# Supplementary material for: Arsenic metabolism in technical biogas plants: possible consequences for resident microbiota and downstream units
Source: AMB Express. 2019 Nov 28;9:190. doi: 10.1186/s13568-019-0902-6 (PMC6882981; doi:10.1186/s13568-019-0902-6)
Supplement: Supplementary file 2 — Additional file 2. Additional electronic material, which provides full dataset of Figure 1 (Qiime2 files). [file 13568_2019_902_MOESM2_ESM.qzv]

Archive with 68 entries (68 files):
- 41ab44e8-4670-4568-81db-98b188333850/checksums.md5
- 41ab44e8-4670-4568-81db-98b188333850/metadata.yaml
- 41ab44e8-4670-4568-81db-98b188333850/VERSION
- 41ab44e8-4670-4568-81db-98b188333850/data/level-7.csv
- 41ab44e8-4670-4568-81db-98b188333850/data/level-5.csv
- 41ab44e8-4670-4568-81db-98b188333850/data/level-3.jsonp
- 41ab44e8-4670-4568-81db-98b188333850/data/level-6.csv
- 41ab44e8-4670-4568-81db-98b188333850/data/level-6.jsonp
- 41ab44e8-4670-4568-81db-98b188333850/data/level-2.csv
- 41ab44e8-4670-4568-81db-98b188333850/data/level-1.csv
- 41ab44e8-4670-4568-81db-98b188333850/data/level-4.csv
- 41ab44e8-4670-4568-81db-98b188333850/data/level-4.jsonp
- 41ab44e8-4670-4568-81db-98b188333850/data/level-2.jsonp
- 41ab44e8-4670-4568-81db-98b188333850/data/index.html
- 41ab44e8-4670-4568-81db-98b188333850/data/level-7.jsonp
- 41ab44e8-4670-4568-81db-98b188333850/data/level-5.jsonp
- 41ab44e8-4670-4568-81db-98b188333850/data/level-1.jsonp
- 41ab44e8-4670-4568-81db-98b188333850/data/level-3.csv
- 41ab44e8-4670-4568-81db-98b188333850/data/dist/vendor.bundle.js
- 41ab44e8-4670-4568-81db-98b188333850/data/dist/bundle.js
- 41ab44e8-4670-4568-81db-98b188333850/data/dist/d3-license.txt
- 41ab44e8-4670-4568-81db-98b188333850/data/dist/d3-scale-chromatic-license.txt
- 41ab44e8-4670-4568-81db-98b188333850/data/dist/thenBy-license.txt
- 41ab44e8-4670-4568-81db-98b188333850/data/q2templateassets/css/bootstrap.min.css
- 41ab44e8-4670-4568-81db-98b188333850/data/q2templateassets/css/tab-parent.css
- 41ab44e8-4670-4568-81db-98b188333850/data/q2templateassets/css/normalize.css
- 41ab44e8-4670-4568-81db-98b188333850/data/q2templateassets/js/parent.js
- 41ab44e8-4670-4568-81db-98b188333850/data/q2templateassets/js/child.js
- 41ab44e8-4670-4568-81db-98b188333850/data/q2templateassets/js/bootstrap.min.js
- 41ab44e8-4670-4568-81db-98b188333850/data/q2templateassets/js/jquery-3.2.0.min.js
- 41ab44e8-4670-4568-81db-98b188333850/data/q2templateassets/img/qiime2-rect-200.png
- 41ab44e8-4670-4568-81db-98b188333850/data/q2templateassets/fonts/glyphicons-halflings-regular.eot
- 41ab44e8-4670-4568-81db-98b188333850/data/q2templateassets/fonts/glyphicons-halflings-regular.svg
- 41ab44e8-4670-4568-81db-98b188333850/data/q2templateassets/fonts/glyphicons-halflings-regular.ttf
- 41ab44e8-4670-4568-81db-98b188333850/data/q2templateassets/fonts/glyphicons-halflings-regular.woff2
- 41ab44e8-4670-4568-81db-98b188333850/data/q2templateassets/fonts/glyphicons-halflings-regular.woff
- 41ab44e8-4670-4568-81db-98b188333850/provenance/citations.bib
- 41ab44e8-4670-4568-81db-98b188333850/provenance/metadata.yaml
- 41ab44e8-4670-4568-81db-98b188333850/provenance/VERSION
- 41ab44e8-4670-4568-81db-98b188333850/provenance/action/metadata.tsv
- 41ab44e8-4670-4568-81db-98b188333850/provenance/action/action.yaml
- 41ab44e8-4670-4568-81db-98b188333850/provenance/artifacts/f1d80efb-8972-468c-a086-5f4e54de57f8/metadata.yaml
- 41ab44e8-4670-4568-81db-98b188333850/provenance/artifacts/f1d80efb-8972-468c-a086-5f4e54de57f8/VERSION
- 41ab44e8-4670-4568-81db-98b188333850/provenance/artifacts/f1d80efb-8972-468c-a086-5f4e54de57f8/action/action.yaml
- 41ab44e8-4670-4568-81db-98b188333850/provenance/artifacts/4abdda52-c3e4-47f0-9813-2b11485694e5/citations.bib
- 41ab44e8-4670-4568-81db-98b188333850/provenance/artifacts/4abdda52-c3e4-47f0-9813-2b11485694e5/metadata.yaml
- 41ab44e8-4670-4568-81db-98b188333850/provenance/artifacts/4abdda52-c3e4-47f0-9813-2b11485694e5/VERSION
- 41ab44e8-4670-4568-81db-98b188333850/provenance/artifacts/4abdda52-c3e4-47f0-9813-2b11485694e5/action/action.yaml
- 41ab44e8-4670-4568-81db-98b188333850/provenance/artifacts/f6fa68d6-9593-42c8-8a04-0bc34db08461/citations.bib
- 41ab44e8-4670-4568-81db-98b188333850/provenance/artifacts/f6fa68d6-9593-42c8-8a04-0bc34db08461/metadata.yaml
- 41ab44e8-4670-4568-81db-98b188333850/provenance/artifacts/f6fa68d6-9593-42c8-8a04-0bc34db08461/VERSION
- 41ab44e8-4670-4568-81db-98b188333850/provenance/artifacts/f6fa68d6-9593-42c8-8a04-0bc34db08461/action/action.yaml
- 41ab44e8-4670-4568-81db-98b188333850/provenance/artifacts/a56e52e0-7ff2-4631-83a1-7d3b2a50f1d1/metadata.yaml
- 41ab44e8-4670-4568-81db-98b188333850/provenance/artifacts/a56e52e0-7ff2-4631-83a1-7d3b2a50f1d1/VERSION
- 41ab44e8-4670-4568-81db-98b188333850/provenance/artifacts/a56e52e0-7ff2-4631-83a1-7d3b2a50f1d1/action/action.yaml
- 41ab44e8-4670-4568-81db-98b188333850/provenance/artifacts/4ded0bb6-58f0-4cca-82e8-a9404791c6a7/metadata.yaml
- 41ab44e8-4670-4568-81db-98b188333850/provenance/artifacts/4ded0bb6-58f0-4cca-82e8-a9404791c6a7/VERSION
- 41ab44e8-4670-4568-81db-98b188333850/provenance/artifacts/4ded0bb6-58f0-4cca-82e8-a9404791c6a7/action/action.yaml
- 41ab44e8-4670-4568-81db-98b188333850/provenance/artifacts/44603abb-5c65-40a3-b078-95a303f60c2b/metadata.yaml
- 41ab44e8-4670-4568-81db-98b188333850/provenance/artifacts/44603abb-5c65-40a3-b078-95a303f60c2b/VERSION
- 41ab44e8-4670-4568-81db-98b188333850/provenance/artifacts/44603abb-5c65-40a3-b078-95a303f60c2b/action/action.yaml
- 41ab44e8-4670-4568-81db-98b188333850/provenance/artifacts/d4dbb9b2-74d3-4db6-a827-cf83ea0ba0fb/metadata.yaml
- 41ab44e8-4670-4568-81db-98b188333850/provenance/artifacts/d4dbb9b2-74d3-4db6-a827-cf83ea0ba0fb/VERSION
- 41ab44e8-4670-4568-81db-98b188333850/provenance/artifacts/d4dbb9b2-74d3-4db6-a827-cf83ea0ba0fb/action/action.yaml
- 41ab44e8-4670-4568-81db-98b188333850/provenance/artifacts/cbdba207-95b8-49eb-8d33-a7b5f852690a/citations.bib
- 41ab44e8-4670-4568-81db-98b188333850/provenance/artifacts/cbdba207-95b8-49eb-8d33-a7b5f852690a/metadata.yaml
- 41ab44e8-4670-4568-81db-98b188333850/provenance/artifacts/cbdba207-95b8-49eb-8d33-a7b5f852690a/VERSION
- 41ab44e8-4670-4568-81db-98b188333850/provenance/artifacts/cbdba207-95b8-49eb-8d33-a7b5f852690a/action/action.yaml
