# Supplementary material for: Arsenic metabolism in technical biogas plants: possible consequences for resident microbiota and downstream units
Source: AMB Express. 2019 Nov 28;9:190. doi: 10.1186/s13568-019-0902-6 (PMC6882981; doi:10.1186/s13568-019-0902-6)
Supplement: Supplementary file 2 — Additional file 2. Additional electronic material, which provides full dataset of Figure 1 (Qiime2 files). [file 13568_2019_902_MOESM2_ESM.qzv › 41ab44e8-4670-4568-81db-98b188333850/checksums.md5]

feea9bc4f7035a12723bfa8775a74d59  VERSION
8e596daf5b97348712b817b14f5772cb  metadata.yaml
96a668a02aef3b4614d8c3a29c12b26b  data/index.html
1afdad319216e0955f1c7241f0f75e08  data/level-1.csv
fe39c3822da2cf9b401ca2ee82aed4b6  data/level-1.jsonp
1cb8e0c487e89937e2d524e7731eb86f  data/level-2.csv
ac96505dab153c399ba9a07dd90caa11  data/level-2.jsonp
b3e1a92c82730e5d7986099a44f4b2af  data/level-3.csv
675ce147c918ee08080aea1e54d67f9b  data/level-3.jsonp
1704d1dbd00954e64f6560edd1dacd14  data/level-4.csv
568fca612bb9095f7f833183e52b7489  data/level-4.jsonp
9cf60911793acd5e879bf7807dbb09d5  data/level-5.csv
43f68362ff1184161b7a0bb94e31c9fd  data/level-5.jsonp
27057a412f31dcf1636483cb8fd90fca  data/level-6.csv
5503f85ba9e2cc27f91a66738a4dca9c  data/level-6.jsonp
09d21c0f25f2bce02a8b87bdce862026  data/level-7.csv
105dae3f81d1bdd4b6267ad4de821b63  data/level-7.jsonp
76d1a901dd33517cbddce77cf2cb41ca  data/dist/bundle.js
50142b6c2444076623d0819ea6448352  data/dist/d3-license.txt
daa4a96370c888d3a03365173482516e  data/dist/d3-scale-chromatic-license.txt
ecca8f2b8a84749ce6623ef81b19e5ed  data/dist/thenBy-license.txt
ccec0221608959985178200f31c9d7e2  data/dist/vendor.bundle.js
e3e8b38fed66211f84a6d5ddb8e0f876  data/q2templateassets/css/bootstrap.min.css
be7f3425b44480dcf3aab3408f632f37  data/q2templateassets/css/normalize.css
0893e573eb42bc294a478a3e187fa80b  data/q2templateassets/css/tab-parent.css
f4769f9bdb7466be65088239c12046d1  data/q2templateassets/fonts/glyphicons-halflings-regular.eot
89889688147bd7575d6327160d64e760  data/q2templateassets/fonts/glyphicons-halflings-regular.svg
e18bbf611f2a2e43afc071aa2f4e1512  data/q2templateassets/fonts/glyphicons-halflings-regular.ttf
fa2772327f55d8198301fdb8bcfc8158  data/q2templateassets/fonts/glyphicons-halflings-regular.woff
448c34a56d699c29117adc64c43affeb  data/q2templateassets/fonts/glyphicons-halflings-regular.woff2
91a940675401d7263fd5da9360f20881  data/q2templateassets/img/qiime2-rect-200.png
5869c96cc8f19086aee625d670d741f9  data/q2templateassets/js/bootstrap.min.js
794b5307794fec58b12f1ab690cedee1  data/q2templateassets/js/child.js
d4162c9d7e520a5de05001be6e741899  data/q2templateassets/js/jquery-3.2.0.min.js
bc1efc8406af887ba7ed6fccbe229a81  data/q2templateassets/js/parent.js
feea9bc4f7035a12723bfa8775a74d59  provenance/VERSION
5f4d26baf882d2c66228c95e19901ce4  provenance/citations.bib
8e596daf5b97348712b817b14f5772cb  provenance/metadata.yaml
fa2df4c835e964203a78003c27f01b45  provenance/action/action.yaml
f4d2a9d827ff47310b8e0eea13dfc09c  provenance/action/metadata.tsv
c2c57f2b4d412141865ecfeaea28e42a  provenance/artifacts/44603abb-5c65-40a3-b078-95a303f60c2b/VERSION
af517f0aaaafa3d7819388962e9e5d4a  provenance/artifacts/44603abb-5c65-40a3-b078-95a303f60c2b/metadata.yaml
b9356e3a7444d5afa41f620398bcebf2  provenance/artifacts/44603abb-5c65-40a3-b078-95a303f60c2b/action/action.yaml
cd3605e5eb801971433961ac904c6cfc  provenance/artifacts/4abdda52-c3e4-47f0-9813-2b11485694e5/VERSION
e7b2dfabc56afaab7779639ce20ab0eb  provenance/artifacts/4abdda52-c3e4-47f0-9813-2b11485694e5/citations.bib
37b048f9ed3d78176e78db44f0f22044  provenance/artifacts/4abdda52-c3e4-47f0-9813-2b11485694e5/metadata.yaml
3e9d7e1336c5407551cebdd75faca073  provenance/artifacts/4abdda52-c3e4-47f0-9813-2b11485694e5/action/action.yaml
2f8317dd725209cf97b2d3c3ccedaca0  provenance/artifacts/4ded0bb6-58f0-4cca-82e8-a9404791c6a7/VERSION
6a09404f51df48d07cd0441dd1213ee0  provenance/artifacts/4ded0bb6-58f0-4cca-82e8-a9404791c6a7/metadata.yaml
6d1d4397ee5ca3b849e66a6900ae517f  provenance/artifacts/4ded0bb6-58f0-4cca-82e8-a9404791c6a7/action/action.yaml
2f8317dd725209cf97b2d3c3ccedaca0  provenance/artifacts/a56e52e0-7ff2-4631-83a1-7d3b2a50f1d1/VERSION
8d206a33ed29f7002cb6c46e82379fd1  provenance/artifacts/a56e52e0-7ff2-4631-83a1-7d3b2a50f1d1/metadata.yaml
376ee1e822e08dbf42748535323b225f  provenance/artifacts/a56e52e0-7ff2-4631-83a1-7d3b2a50f1d1/action/action.yaml
cd3605e5eb801971433961ac904c6cfc  provenance/artifacts/cbdba207-95b8-49eb-8d33-a7b5f852690a/VERSION
cf007734654a733e16dd9d640fd4dd20  provenance/artifacts/cbdba207-95b8-49eb-8d33-a7b5f852690a/citations.bib
27a66f24ef5ce5e7e9d7fcbd2836d2e7  provenance/artifacts/cbdba207-95b8-49eb-8d33-a7b5f852690a/metadata.yaml
43ccb0ad54f9c56a26f275d82c11345a  provenance/artifacts/cbdba207-95b8-49eb-8d33-a7b5f852690a/action/action.yaml
2f8317dd725209cf97b2d3c3ccedaca0  provenance/artifacts/d4dbb9b2-74d3-4db6-a827-cf83ea0ba0fb/VERSION
7ff4390277bb8385f9375014ce75377b  provenance/artifacts/d4dbb9b2-74d3-4db6-a827-cf83ea0ba0fb/metadata.yaml
b822f90f175e920bae27c6bff4790b2e  provenance/artifacts/d4dbb9b2-74d3-4db6-a827-cf83ea0ba0fb/action/action.yaml
c2c57f2b4d412141865ecfeaea28e42a  provenance/artifacts/f1d80efb-8972-468c-a086-5f4e54de57f8/VERSION
b304f047cecc54f7286bce60b52f3e42  provenance/artifacts/f1d80efb-8972-468c-a086-5f4e54de57f8/metadata.yaml
1b9225b652a0fb3c312a2c1fcf7bed2c  provenance/artifacts/f1d80efb-8972-468c-a086-5f4e54de57f8/action/action.yaml
cd3605e5eb801971433961ac904c6cfc  provenance/artifacts/f6fa68d6-9593-42c8-8a04-0bc34db08461/VERSION
b1a096a64a46aa3617cfe79a0f460635  provenance/artifacts/f6fa68d6-9593-42c8-8a04-0bc34db08461/citations.bib
1ed32b2b215866e8ac0fdefa0a003263  provenance/artifacts/f6fa68d6-9593-42c8-8a04-0bc34db08461/metadata.yaml
c91c498059995f06c6a15d7756de7ff8  provenance/artifacts/f6fa68d6-9593-42c8-8a04-0bc34db08461/action/action.yaml
