# Supplementary material for: Arsenic metabolism in technical biogas plants: possible consequences for resident microbiota and downstream units
Source: AMB Express. 2019 Nov 28;9:190. doi: 10.1186/s13568-019-0902-6 (PMC6882981; doi:10.1186/s13568-019-0902-6)
Supplement: Supplementary file 2 — Additional file 2. Additional electronic material, which provides full dataset of Figure 1 (Qiime2 files). [file 13568_2019_902_MOESM2_ESM.qzv › 41ab44e8-4670-4568-81db-98b188333850/data/level-1.csv]

index	k__Archaea	k__Bacteria	plant type	plant no.
01_U341F-U806R-NW3-1	97.0	2547.0	Biogas	#01
02_U341F-U806R-NW3-2	341.0	12525.0	Biogas	#02
03_U341F-U806R-NW3-3	1456.0	10303.0	Biogas	#02
04_U341F-U806R-NW3-4	103.0	11592.0	Biogas	#04
05_U341F-U806R-NW3-5	0.0	5707.0	Biogas	#05
06_U341F-U806R-NW3-6	1102.0	10722.0	Biogas	#06
07_U341F-U806R-NW3-8	100.0	12374.0	Biogas	#07
08_U341F-U806R-NW3-9	0.0	3165.0	Biogas	#08
09_U341F-U806R-NW3-10	777.0	10775.0	Biogas	#09
10_U341F-U806R-NW3-11	81.0	11610.0	Biogas	#10
11_U341F-U806R-NW3-12	35.0	12451.0	Biogas	#11
12_U341F-U806R-NW3-14	40.0	10875.0	Biogas	#12
13_U341F-U806R-NW3-15	621.0	12108.0	Biogas	#13
14_U341F-U806R-NW3-7	804.0	13862.0	SSD	#14
15_U341F-U806R-NW3-13	313.0	5161.0	SSD	#15
