# Supplementary material for: Arsenic metabolism in technical biogas plants: possible consequences for resident microbiota and downstream units
Source: AMB Express. 2019 Nov 28;9:190. doi: 10.1186/s13568-019-0902-6 (PMC6882981; doi:10.1186/s13568-019-0902-6)
Supplement: Supplementary file 2 — Additional file 2. Additional electronic material, which provides full dataset of Figure 1 (Qiime2 files). [file 13568_2019_902_MOESM2_ESM.qzv › 41ab44e8-4670-4568-81db-98b188333850/data/level-2.csv]

index	k__Archaea;p__Crenarchaeota	k__Archaea;p__Euryarchaeota	k__Archaea;p__[Parvarchaeota]	k__Bacteria;__	k__Bacteria;p__	k__Bacteria;p__Acidobacteria	k__Bacteria;p__Actinobacteria	k__Bacteria;p__Armatimonadetes	k__Bacteria;p__Bacteroidetes	k__Bacteria;p__Caldiserica	k__Bacteria;p__Chlorobi	k__Bacteria;p__Chloroflexi	k__Bacteria;p__Cyanobacteria	k__Bacteria;p__EM3	k__Bacteria;p__Fibrobacteres	k__Bacteria;p__Firmicutes	k__Bacteria;p__NKB19	k__Bacteria;p__OD1	k__Bacteria;p__OP1	k__Bacteria;p__OP8	k__Bacteria;p__OP9	k__Bacteria;p__Proteobacteria	k__Bacteria;p__SAR406	k__Bacteria;p__SR1	k__Bacteria;p__Spirochaetes	k__Bacteria;p__Synergistetes	k__Bacteria;p__TA06	k__Bacteria;p__TM7	k__Bacteria;p__Tenericutes	k__Bacteria;p__Thermotogae	k__Bacteria;p__Verrucomicrobia	k__Bacteria;p__WPS-2	k__Bacteria;p__WS6	k__Bacteria;p__WWE1	plant type	plant no.
01_U341F-U806R-NW3-1	0.0	97.0	0.0	0.0	35.0	0.0	9.0	0.0	432.0	0.0	0.0	0.0	0.0	0.0	10.0	1716.0	0.0	0.0	0.0	0.0	55.0	0.0	0.0	2.0	10.0	111.0	0.0	0.0	16.0	110.0	0.0	0.0	0.0	41.0	Biogas	#01
02_U341F-U806R-NW3-2	22.0	319.0	0.0	191.0	169.0	54.0	151.0	0.0	2871.0	0.0	0.0	26.0	0.0	0.0	103.0	6695.0	5.0	5.0	0.0	0.0	26.0	27.0	0.0	39.0	97.0	64.0	0.0	0.0	93.0	5.0	0.0	4.0	23.0	1877.0	Biogas	#02
03_U341F-U806R-NW3-3	0.0	1456.0	0.0	8.0	213.0	0.0	0.0	0.0	1182.0	0.0	0.0	0.0	0.0	0.0	5.0	7496.0	0.0	0.0	0.0	0.0	48.0	0.0	0.0	114.0	20.0	83.0	0.0	0.0	83.0	0.0	0.0	0.0	0.0	1051.0	Biogas	#02
04_U341F-U806R-NW3-4	0.0	103.0	0.0	118.0	372.0	0.0	115.0	0.0	4045.0	0.0	0.0	0.0	0.0	0.0	10.0	6183.0	0.0	0.0	0.0	0.0	0.0	44.0	0.0	61.0	0.0	63.0	0.0	0.0	304.0	173.0	0.0	0.0	0.0	104.0	Biogas	#04
05_U341F-U806R-NW3-5	0.0	0.0	0.0	52.0	28.0	0.0	0.0	0.0	414.0	0.0	0.0	0.0	0.0	0.0	0.0	4928.0	0.0	0.0	0.0	0.0	9.0	0.0	0.0	19.0	60.0	0.0	0.0	0.0	138.0	0.0	0.0	0.0	0.0	59.0	Biogas	#05
06_U341F-U806R-NW3-6	13.0	1089.0	0.0	145.0	310.0	17.0	61.0	0.0	2431.0	0.0	0.0	8.0	0.0	0.0	57.0	5931.0	0.0	12.0	0.0	0.0	21.0	15.0	0.0	277.0	63.0	104.0	0.0	8.0	357.0	0.0	27.0	11.0	6.0	861.0	Biogas	#06
07_U341F-U806R-NW3-8	0.0	100.0	0.0	19.0	91.0	0.0	0.0	0.0	2625.0	0.0	0.0	0.0	0.0	0.0	0.0	9139.0	0.0	0.0	0.0	0.0	16.0	0.0	0.0	0.0	0.0	94.0	0.0	0.0	70.0	320.0	0.0	0.0	0.0	0.0	Biogas	#07
08_U341F-U806R-NW3-9	0.0	0.0	0.0	0.0	76.0	0.0	0.0	0.0	403.0	0.0	0.0	0.0	0.0	0.0	0.0	2542.0	0.0	0.0	0.0	0.0	0.0	0.0	0.0	0.0	0.0	47.0	0.0	0.0	66.0	31.0	0.0	0.0	0.0	0.0	Biogas	#08
09_U341F-U806R-NW3-10	8.0	769.0	0.0	68.0	208.0	54.0	78.0	0.0	4115.0	0.0	0.0	0.0	2.0	0.0	82.0	4789.0	5.0	0.0	0.0	0.0	11.0	12.0	0.0	168.0	197.0	158.0	0.0	67.0	284.0	0.0	6.0	0.0	3.0	468.0	Biogas	#09
10_U341F-U806R-NW3-11	0.0	81.0	0.0	20.0	442.0	0.0	0.0	0.0	1309.0	0.0	0.0	0.0	0.0	0.0	0.0	8118.0	0.0	0.0	0.0	0.0	15.0	0.0	0.0	0.0	0.0	55.0	0.0	0.0	175.0	1476.0	0.0	0.0	0.0	0.0	Biogas	#10
11_U341F-U806R-NW3-12	0.0	35.0	0.0	126.0	266.0	19.0	0.0	0.0	1418.0	0.0	0.0	0.0	0.0	0.0	29.0	8828.0	0.0	32.0	0.0	0.0	57.0	0.0	0.0	16.0	26.0	284.0	0.0	0.0	112.0	223.0	0.0	0.0	0.0	1015.0	Biogas	#11
12_U341F-U806R-NW3-14	0.0	40.0	0.0	21.0	247.0	0.0	0.0	0.0	2665.0	0.0	0.0	0.0	0.0	0.0	0.0	7472.0	0.0	10.0	0.0	0.0	7.0	0.0	0.0	0.0	0.0	70.0	0.0	0.0	383.0	0.0	0.0	0.0	0.0	0.0	Biogas	#12
13_U341F-U806R-NW3-15	0.0	621.0	0.0	34.0	451.0	0.0	35.0	0.0	1673.0	0.0	0.0	0.0	0.0	0.0	0.0	9455.0	0.0	0.0	0.0	0.0	74.0	0.0	0.0	0.0	5.0	70.0	0.0	0.0	301.0	0.0	0.0	0.0	2.0	8.0	Biogas	#13
14_U341F-U806R-NW3-7	0.0	804.0	0.0	224.0	905.0	19.0	351.0	8.0	2487.0	31.0	16.0	441.0	0.0	793.0	0.0	4075.0	0.0	313.0	20.0	304.0	85.0	357.0	8.0	0.0	501.0	168.0	5.0	141.0	4.0	225.0	0.0	4.0	28.0	2349.0	SSD	#14
15_U341F-U806R-NW3-13	0.0	308.0	5.0	0.0	16.0	14.0	998.0	0.0	1527.0	0.0	33.0	176.0	0.0	0.0	0.0	1375.0	11.0	0.0	0.0	0.0	29.0	83.0	0.0	260.0	5.0	549.0	0.0	53.0	4.0	0.0	0.0	0.0	0.0	28.0	SSD	#15
