# Supplementary material for: Arsenic metabolism in technical biogas plants: possible consequences for resident microbiota and downstream units
Source: AMB Express. 2019 Nov 28;9:190. doi: 10.1186/s13568-019-0902-6 (PMC6882981; doi:10.1186/s13568-019-0902-6)
Supplement: Supplementary file 2 — Additional file 2. Additional electronic material, which provides full dataset of Figure 1 (Qiime2 files). [file 13568_2019_902_MOESM2_ESM.qzv › 41ab44e8-4670-4568-81db-98b188333850/data/level-2.jsonp]

load_data(2,["k__Archaea;p__Crenarchaeota", "k__Archaea;p__Euryarchaeota", "k__Archaea;p__[Parvarchaeota]", "k__Bacteria;__", "k__Bacteria;p__", "k__Bacteria;p__Acidobacteria", "k__Bacteria;p__Actinobacteria", "k__Bacteria;p__Armatimonadetes", "k__Bacteria;p__Bacteroidetes", "k__Bacteria;p__Caldiserica", "k__Bacteria;p__Chlorobi", "k__Bacteria;p__Chloroflexi", "k__Bacteria;p__Cyanobacteria", "k__Bacteria;p__EM3", "k__Bacteria;p__Fibrobacteres", "k__Bacteria;p__Firmicutes", "k__Bacteria;p__NKB19", "k__Bacteria;p__OD1", "k__Bacteria;p__OP1", "k__Bacteria;p__OP8", "k__Bacteria;p__OP9", "k__Bacteria;p__Proteobacteria", "k__Bacteria;p__SAR406", "k__Bacteria;p__SR1", "k__Bacteria;p__Spirochaetes", "k__Bacteria;p__Synergistetes", "k__Bacteria;p__TA06", "k__Bacteria;p__TM7", "k__Bacteria;p__Tenericutes", "k__Bacteria;p__Thermotogae", "k__Bacteria;p__Verrucomicrobia", "k__Bacteria;p__WPS-2", "k__Bacteria;p__WS6", "k__Bacteria;p__WWE1"],["index", "k__Archaea;p__Crenarchaeota", "k__Archaea;p__Euryarchaeota", "k__Archaea;p__[Parvarchaeota]", "k__Bacteria;__", "k__Bacteria;p__", "k__Bacteria;p__Acidobacteria", "k__Bacteria;p__Actinobacteria", "k__Bacteria;p__Armatimonadetes", "k__Bacteria;p__Bacteroidetes", "k__Bacteria;p__Caldiserica", "k__Bacteria;p__Chlorobi", "k__Bacteria;p__Chloroflexi", "k__Bacteria;p__Cyanobacteria", "k__Bacteria;p__EM3", "k__Bacteria;p__Fibrobacteres", "k__Bacteria;p__Firmicutes", "k__Bacteria;p__NKB19", "k__Bacteria;p__OD1", "k__Bacteria;p__OP1", "k__Bacteria;p__OP8", "k__Bacteria;p__OP9", "k__Bacteria;p__Proteobacteria", "k__Bacteria;p__SAR406", "k__Bacteria;p__SR1", "k__Bacteria;p__Spirochaetes", "k__Bacteria;p__Synergistetes", "k__Bacteria;p__TA06", "k__Bacteria;p__TM7", "k__Bacteria;p__Tenericutes", "k__Bacteria;p__Thermotogae", "k__Bacteria;p__Verrucomicrobia", "k__Bacteria;p__WPS-2", "k__Bacteria;p__WS6", "k__Bacteria;p__WWE1", "plant type", "plant no."],[{"index":"01_U341F-U806R-NW3-1","k__Archaea;p__Crenarchaeota":0.0,"k__Archaea;p__Euryarchaeota":97.0,"k__Archaea;p__[Parvarchaeota]":0.0,"k__Bacteria;__":0.0,"k__Bacteria;p__":35.0,"k__Bacteria;p__Acidobacteria":0.0,"k__Bacteria;p__Actinobacteria":9.0,"k__Bacteria;p__Armatimonadetes":0.0,"k__Bacteria;p__Bacteroidetes":432.0,"k__Bacteria;p__Caldiserica":0.0,"k__Bacteria;p__Chlorobi":0.0,"k__Bacteria;p__Chloroflexi":0.0,"k__Bacteria;p__Cyanobacteria":0.0,"k__Bacteria;p__EM3":0.0,"k__Bacteria;p__Fibrobacteres":10.0,"k__Bacteria;p__Firmicutes":1716.0,"k__Bacteria;p__NKB19":0.0,"k__Bacteria;p__OD1":0.0,"k__Bacteria;p__OP1":0.0,"k__Bacteria;p__OP8":0.0,"k__Bacteria;p__OP9":55.0,"k__Bacteria;p__Proteobacteria":0.0,"k__Bacteria;p__SAR406":0.0,"k__Bacteria;p__SR1":2.0,"k__Bacteria;p__Spirochaetes":10.0,"k__Bacteria;p__Synergistetes":111.0,"k__Bacteria;p__TA06":0.0,"k__Bacteria;p__TM7":0.0,"k__Bacteria;p__Tenericutes":16.0,"k__Bacteria;p__Thermotogae":110.0,"k__Bacteria;p__Verrucomicrobia":0.0,"k__Bacteria;p__WPS-2":0.0,"k__Bacteria;p__WS6":0.0,"k__Bacteria;p__WWE1":41.0,"plant type":"Biogas","plant no.":"#01"},{"index":"02_U341F-U806R-NW3-2","k__Archaea;p__Crenarchaeota":22.0,"k__Archaea;p__Euryarchaeota":319.0,"k__Archaea;p__[Parvarchaeota]":0.0,"k__Bacteria;__":191.0,"k__Bacteria;p__":169.0,"k__Bacteria;p__Acidobacteria":54.0,"k__Bacteria;p__Actinobacteria":151.0,"k__Bacteria;p__Armatimonadetes":0.0,"k__Bacteria;p__Bacteroidetes":2871.0,"k__Bacteria;p__Caldiserica":0.0,"k__Bacteria;p__Chlorobi":0.0,"k__Bacteria;p__Chloroflexi":26.0,"k__Bacteria;p__Cyanobacteria":0.0,"k__Bacteria;p__EM3":0.0,"k__Bacteria;p__Fibrobacteres":103.0,"k__Bacteria;p__Firmicutes":6695.0,"k__Bacteria;p__NKB19":5.0,"k__Bacteria;p__OD1":5.0,"k__Bacteria;p__OP1":0.0,"k__Bacteria;p__OP8":0.0,"k__Bacteria;p__OP9":26.0,"k__Bacteria;p__Proteobacteria":27.0,"k__Bacteria;p__SAR406":0.0,"k__Bacteria;p__SR1":39.0,"k__Bacteria;p__Spirochaetes":97.0,"k__Bacteria;p__Synergistetes":64.0,"k__Bacteria;p__TA06":0.0,"k__Bacteria;p__TM7":0.0,"k__Bacteria;p__Tenericutes":93.0,"k__Bacteria;p__Thermotogae":5.0,"k__Bacteria;p__Verrucomicrobia":0.0,"k__Bacteria;p__WPS-2":4.0,"k__Bacteria;p__WS6":23.0,"k__Bacteria;p__WWE1":1877.0,"plant type":"Biogas","plant no.":"#02"},{"index":"03_U341F-U806R-NW3-3","k__Archaea;p__Crenarchaeota":0.0,"k__Archaea;p__Euryarchaeota":1456.0,"k__Archaea;p__[Parvarchaeota]":0.0,"k__Bacteria;__":8.0,"k__Bacteria;p__":213.0,"k__Bacteria;p__Acidobacteria":0.0,"k__Bacteria;p__Actinobacteria":0.0,"k__Bacteria;p__Armatimonadetes":0.0,"k__Bacteria;p__Bacteroidetes":1182.0,"k__Bacteria;p__Caldiserica":0.0,"k__Bacteria;p__Chlorobi":0.0,"k__Bacteria;p__Chloroflexi":0.0,"k__Bacteria;p__Cyanobacteria":0.0,"k__Bacteria;p__EM3":0.0,"k__Bacteria;p__Fibrobacteres":5.0,"k__Bacteria;p__Firmicutes":7496.0,"k__Bacteria;p__NKB19":0.0,"k__Bacteria;p__OD1":0.0,"k__Bacteria;p__OP1":0.0,"k__Bacteria;p__OP8":0.0,"k__Bacteria;p__OP9":48.0,"k__Bacteria;p__Proteobacteria":0.0,"k__Bacteria;p__SAR406":0.0,"k__Bacteria;p__SR1":114.0,"k__Bacteria;p__Spirochaetes":20.0,"k__Bacteria;p__Synergistetes":83.0,"k__Bacteria;p__TA06":0.0,"k__Bacteria;p__TM7":0.0,"k__Bacteria;p__Tenericutes":83.0,"k__Bacteria;p__Thermotogae":0.0,"k__Bacteria;p__Verrucomicrobia":0.0,"k__Bacteria;p__WPS-2":0.0,"k__Bacteria;p__WS6":0.0,"k__Bacteria;p__WWE1":1051.0,"plant type":"Biogas","plant no.":"#02"},{"index":"04_U341F-U806R-NW3-4","k__Archaea;p__Crenarchaeota":0.0,"k__Archaea;p__Euryarchaeota":103.0,"k__Archaea;p__[Parvarchaeota]":0.0,"k__Bacteria;__":118.0,"k__Bacteria;p__":372.0,"k__Bacteria;p__Acidobacteria":0.0,"k__Bacteria;p__Actinobacteria":115.0,"k__Bacteria;p__Armatimonadetes":0.0,"k__Bacteria;p__Bacteroidetes":4045.0,"k__Bacteria;p__Caldiserica":0.0,"k__Bacteria;p__Chlorobi":0.0,"k__Bacteria;p__Chloroflexi":0.0,"k__Bacteria;p__Cyanobacteria":0.0,"k__Bacteria;p__EM3":0.0,"k__Bacteria;p__Fibrobacteres":10.0,"k__Bacteria;p__Firmicutes":6183.0,"k__Bacteria;p__NKB19":0.0,"k__Bacteria;p__OD1":0.0,"k__Bacteria;p__OP1":0.0,"k__Bacteria;p__OP8":0.0,"k__Bacteria;p__OP9":0.0,"k__Bacteria;p__Proteobacteria":44.0,"k__Bacteria;p__SAR406":0.0,"k__Bacteria;p__SR1":61.0,"k__Bacteria;p__Spirochaetes":0.0,"k__Bacteria;p__Synergistetes":63.0,"k__Bacteria;p__TA06":0.0,"k__Bacteria;p__TM7":0.0,"k__Bacteria;p__Tenericutes":304.0,"k__Bacteria;p__Thermotogae":173.0,"k__Bacteria;p__Verrucomicrobia":0.0,"k__Bacteria;p__WPS-2":0.0,"k__Bacteria;p__WS6":0.0,"k__Bacteria;p__WWE1":104.0,"plant type":"Biogas","plant no.":"#04"},{"index":"05_U341F-U806R-NW3-5","k__Archaea;p__Crenarchaeota":0.0,"k__Archaea;p__Euryarchaeota":0.0,"k__Archaea;p__[Parvarchaeota]":0.0,"k__Bacteria;__":52.0,"k__Bacteria;p__":28.0,"k__Bacteria;p__Acidobacteria":0.0,"k__Bacteria;p__Actinobacteria":0.0,"k__Bacteria;p__Armatimonadetes":0.0,"k__Bacteria;p__Bacteroidetes":414.0,"k__Bacteria;p__Caldiserica":0.0,"k__Bacteria;p__Chlorobi":0.0,"k__Bacteria;p__Chloroflexi":0.0,"k__Bacteria;p__Cyanobacteria":0.0,"k__Bacteria;p__EM3":0.0,"k__Bacteria;p__Fibrobacteres":0.0,"k__Bacteria;p__Firmicutes":4928.0,"k__Bacteria;p__NKB19":0.0,"k__Bacteria;p__OD1":0.0,"k__Bacteria;p__OP1":0.0,"k__Bacteria;p__OP8":0.0,"k__Bacteria;p__OP9":9.0,"k__Bacteria;p__Proteobacteria":0.0,"k__Bacteria;p__SAR406":0.0,"k__Bacteria;p__SR1":19.0,"k__Bacteria;p__Spirochaetes":60.0,"k__Bacteria;p__Synergistetes":0.0,"k__Bacteria;p__TA06":0.0,"k__Bacteria;p__TM7":0.0,"k__Bacteria;p__Tenericutes":138.0,"k__Bacteria;p__Thermotogae":0.0,"k__Bacteria;p__Verrucomicrobia":0.0,"k__Bacteria;p__WPS-2":0.0,"k__Bacteria;p__WS6":0.0,"k__Bacteria;p__WWE1":59.0,"plant type":"Biogas","plant no.":"#05"},{"index":"06_U341F-U806R-NW3-6","k__Archaea;p__Crenarchaeota":13.0,"k__Archaea;p__Euryarchaeota":1089.0,"k__Archaea;p__[Parvarchaeota]":0.0,"k__Bacteria;__":145.0,"k__Bacteria;p__":310.0,"k__Bacteria;p__Acidobacteria":17.0,"k__Bacteria;p__Actinobacteria":61.0,"k__Bacteria;p__Armatimonadetes":0.0,"k__Bacteria;p__Bacteroidetes":2431.0,"k__Bacteria;p__Caldiserica":0.0,"k__Bacteria;p__Chlorobi":0.0,"k__Bacteria;p__Chloroflexi":8.0,"k__Bacteria;p__Cyanobacteria":0.0,"k__Bacteria;p__EM3":0.0,"k__Bacteria;p__Fibrobacteres":57.0,"k__Bacteria;p__Firmicutes":5931.0,"k__Bacteria;p__NKB19":0.0,"k__Bacteria;p__OD1":12.0,"k__Bacteria;p__OP1":0.0,"k__Bacteria;p__OP8":0.0,"k__Bacteria;p__OP9":21.0,"k__Bacteria;p__Proteobacteria":15.0,"k__Bacteria;p__SAR406":0.0,"k__Bacteria;p__SR1":277.0,"k__Bacteria;p__Spirochaetes":63.0,"k__Bacteria;p__Synergistetes":104.0,"k__Bacteria;p__TA06":0.0,"k__Bacteria;p__TM7":8.0,"k__Bacteria;p__Tenericutes":357.0,"k__Bacteria;p__Thermotogae":0.0,"k__Bacteria;p__Verrucomicrobia":27.0,"k__Bacteria;p__WPS-2":11.0,"k__Bacteria;p__WS6":6.0,"k__Bacteria;p__WWE1":861.0,"plant type":"Biogas","plant no.":"#06"},{"index":"07_U341F-U806R-NW3-8","k__Archaea;p__Crenarchaeota":0.0,"k__Archaea;p__Euryarchaeota":100.0,"k__Archaea;p__[Parvarchaeota]":0.0,"k__Bacteria;__":19.0,"k__Bacteria;p__":91.0,"k__Bacteria;p__Acidobacteria":0.0,"k__Bacteria;p__Actinobacteria":0.0,"k__Bacteria;p__Armatimonadetes":0.0,"k__Bacteria;p__Bacteroidetes":2625.0,"k__Bacteria;p__Caldiserica":0.0,"k__Bacteria;p__Chlorobi":0.0,"k__Bacteria;p__Chloroflexi":0.0,"k__Bacteria;p__Cyanobacteria":0.0,"k__Bacteria;p__EM3":0.0,"k__Bacteria;p__Fibrobacteres":0.0,"k__Bacteria;p__Firmicutes":9139.0,"k__Bacteria;p__NKB19":0.0,"k__Bacteria;p__OD1":0.0,"k__Bacteria;p__OP1":0.0,"k__Bacteria;p__OP8":0.0,"k__Bacteria;p__OP9":16.0,"k__Bacteria;p__Proteobacteria":0.0,"k__Bacteria;p__SAR406":0.0,"k__Bacteria;p__SR1":0.0,"k__Bacteria;p__Spirochaetes":0.0,"k__Bacteria;p__Synergistetes":94.0,"k__Bacteria;p__TA06":0.0,"k__Bacteria;p__TM7":0.0,"k__Bacteria;p__Tenericutes":70.0,"k__Bacteria;p__Thermotogae":320.0,"k__Bacteria;p__Verrucomicrobia":0.0,"k__Bacteria;p__WPS-2":0.0,"k__Bacteria;p__WS6":0.0,"k__Bacteria;p__WWE1":0.0,"plant type":"Biogas","plant no.":"#07"},{"index":"08_U341F-U806R-NW3-9","k__Archaea;p__Crenarchaeota":0.0,"k__Archaea;p__Euryarchaeota":0.0,"k__Archaea;p__[Parvarchaeota]":0.0,"k__Bacteria;__":0.0,"k__Bacteria;p__":76.0,"k__Bacteria;p__Acidobacteria":0.0,"k__Bacteria;p__Actinobacteria":0.0,"k__Bacteria;p__Armatimonadetes":0.0,"k__Bacteria;p__Bacteroidetes":403.0,"k__Bacteria;p__Caldiserica":0.0,"k__Bacteria;p__Chlorobi":0.0,"k__Bacteria;p__Chloroflexi":0.0,"k__Bacteria;p__Cyanobacteria":0.0,"k__Bacteria;p__EM3":0.0,"k__Bacteria;p__Fibrobacteres":0.0,"k__Bacteria;p__Firmicutes":2542.0,"k__Bacteria;p__NKB19":0.0,"k__Bacteria;p__OD1":0.0,"k__Bacteria;p__OP1":0.0,"k__Bacteria;p__OP8":0.0,"k__Bacteria;p__OP9":0.0,"k__Bacteria;p__Proteobacteria":0.0,"k__Bacteria;p__SAR406":0.0,"k__Bacteria;p__SR1":0.0,"k__Bacteria;p__Spirochaetes":0.0,"k__Bacteria;p__Synergistetes":47.0,"k__Bacteria;p__TA06":0.0,"k__Bacteria;p__TM7":0.0,"k__Bacteria;p__Tenericutes":66.0,"k__Bacteria;p__Thermotogae":31.0,"k__Bacteria;p__Verrucomicrobia":0.0,"k__Bacteria;p__WPS-2":0.0,"k__Bacteria;p__WS6":0.0,"k__Bacteria;p__WWE1":0.0,"plant type":"Biogas","plant no.":"#08"},{"index":"09_U341F-U806R-NW3-10","k__Archaea;p__Crenarchaeota":8.0,"k__Archaea;p__Euryarchaeota":769.0,"k__Archaea;p__[Parvarchaeota]":0.0,"k__Bacteria;__":68.0,"k__Bacteria;p__":208.0,"k__Bacteria;p__Acidobacteria":54.0,"k__Bacteria;p__Actinobacteria":78.0,"k__Bacteria;p__Armatimonadetes":0.0,"k__Bacteria;p__Bacteroidetes":4115.0,"k__Bacteria;p__Caldiserica":0.0,"k__Bacteria;p__Chlorobi":0.0,"k__Bacteria;p__Chloroflexi":0.0,"k__Bacteria;p__Cyanobacteria":2.0,"k__Bacteria;p__EM3":0.0,"k__Bacteria;p__Fibrobacteres":82.0,"k__Bacteria;p__Firmicutes":4789.0,"k__Bacteria;p__NKB19":5.0,"k__Bacteria;p__OD1":0.0,"k__Bacteria;p__OP1":0.0,"k__Bacteria;p__OP8":0.0,"k__Bacteria;p__OP9":11.0,"k__Bacteria;p__Proteobacteria":12.0,"k__Bacteria;p__SAR406":0.0,"k__Bacteria;p__SR1":168.0,"k__Bacteria;p__Spirochaetes":197.0,"k__Bacteria;p__Synergistetes":158.0,"k__Bacteria;p__TA06":0.0,"k__Bacteria;p__TM7":67.0,"k__Bacteria;p__Tenericutes":284.0,"k__Bacteria;p__Thermotogae":0.0,"k__Bacteria;p__Verrucomicrobia":6.0,"k__Bacteria;p__WPS-2":0.0,"k__Bacteria;p__WS6":3.0,"k__Bacteria;p__WWE1":468.0,"plant type":"Biogas","plant no.":"#09"},{"index":"10_U341F-U806R-NW3-11","k__Archaea;p__Crenarchaeota":0.0,"k__Archaea;p__Euryarchaeota":81.0,"k__Archaea;p__[Parvarchaeota]":0.0,"k__Bacteria;__":20.0,"k__Bacteria;p__":442.0,"k__Bacteria;p__Acidobacteria":0.0,"k__Bacteria;p__Actinobacteria":0.0,"k__Bacteria;p__Armatimonadetes":0.0,"k__Bacteria;p__Bacteroidetes":1309.0,"k__Bacteria;p__Caldiserica":0.0,"k__Bacteria;p__Chlorobi":0.0,"k__Bacteria;p__Chloroflexi":0.0,"k__Bacteria;p__Cyanobacteria":0.0,"k__Bacteria;p__EM3":0.0,"k__Bacteria;p__Fibrobacteres":0.0,"k__Bacteria;p__Firmicutes":8118.0,"k__Bacteria;p__NKB19":0.0,"k__Bacteria;p__OD1":0.0,"k__Bacteria;p__OP1":0.0,"k__Bacteria;p__OP8":0.0,"k__Bacteria;p__OP9":15.0,"k__Bacteria;p__Proteobacteria":0.0,"k__Bacteria;p__SAR406":0.0,"k__Bacteria;p__SR1":0.0,"k__Bacteria;p__Spirochaetes":0.0,"k__Bacteria;p__Synergistetes":55.0,"k__Bacteria;p__TA06":0.0,"k__Bacteria;p__TM7":0.0,"k__Bacteria;p__Tenericutes":175.0,"k__Bacteria;p__Thermotogae":1476.0,"k__Bacteria;p__Verrucomicrobia":0.0,"k__Bacteria;p__WPS-2":0.0,"k__Bacteria;p__WS6":0.0,"k__Bacteria;p__WWE1":0.0,"plant type":"Biogas","plant no.":"#10"},{"index":"11_U341F-U806R-NW3-12","k__Archaea;p__Crenarchaeota":0.0,"k__Archaea;p__Euryarchaeota":35.0,"k__Archaea;p__[Parvarchaeota]":0.0,"k__Bacteria;__":126.0,"k__Bacteria;p__":266.0,"k__Bacteria;p__Acidobacteria":19.0,"k__Bacteria;p__Actinobacteria":0.0,"k__Bacteria;p__Armatimonadetes":0.0,"k__Bacteria;p__Bacteroidetes":1418.0,"k__Bacteria;p__Caldiserica":0.0,"k__Bacteria;p__Chlorobi":0.0,"k__Bacteria;p__Chloroflexi":0.0,"k__Bacteria;p__Cyanobacteria":0.0,"k__Bacteria;p__EM3":0.0,"k__Bacteria;p__Fibrobacteres":29.0,"k__Bacteria;p__Firmicutes":8828.0,"k__Bacteria;p__NKB19":0.0,"k__Bacteria;p__OD1":32.0,"k__Bacteria;p__OP1":0.0,"k__Bacteria;p__OP8":0.0,"k__Bacteria;p__OP9":57.0,"k__Bacteria;p__Proteobacteria":0.0,"k__Bacteria;p__SAR406":0.0,"k__Bacteria;p__SR1":16.0,"k__Bacteria;p__Spirochaetes":26.0,"k__Bacteria;p__Synergistetes":284.0,"k__Bacteria;p__TA06":0.0,"k__Bacteria;p__TM7":0.0,"k__Bacteria;p__Tenericutes":112.0,"k__Bacteria;p__Thermotogae":223.0,"k__Bacteria;p__Verrucomicrobia":0.0,"k__Bacteria;p__WPS-2":0.0,"k__Bacteria;p__WS6":0.0,"k__Bacteria;p__WWE1":1015.0,"plant type":"Biogas","plant no.":"#11"},{"index":"12_U341F-U806R-NW3-14","k__Archaea;p__Crenarchaeota":0.0,"k__Archaea;p__Euryarchaeota":40.0,"k__Archaea;p__[Parvarchaeota]":0.0,"k__Bacteria;__":21.0,"k__Bacteria;p__":247.0,"k__Bacteria;p__Acidobacteria":0.0,"k__Bacteria;p__Actinobacteria":0.0,"k__Bacteria;p__Armatimonadetes":0.0,"k__Bacteria;p__Bacteroidetes":2665.0,"k__Bacteria;p__Caldiserica":0.0,"k__Bacteria;p__Chlorobi":0.0,"k__Bacteria;p__Chloroflexi":0.0,"k__Bacteria;p__Cyanobacteria":0.0,"k__Bacteria;p__EM3":0.0,"k__Bacteria;p__Fibrobacteres":0.0,"k__Bacteria;p__Firmicutes":7472.0,"k__Bacteria;p__NKB19":0.0,"k__Bacteria;p__OD1":10.0,"k__Bacteria;p__OP1":0.0,"k__Bacteria;p__OP8":0.0,"k__Bacteria;p__OP9":7.0,"k__Bacteria;p__Proteobacteria":0.0,"k__Bacteria;p__SAR406":0.0,"k__Bacteria;p__SR1":0.0,"k__Bacteria;p__Spirochaetes":0.0,"k__Bacteria;p__Synergistetes":70.0,"k__Bacteria;p__TA06":0.0,"k__Bacteria;p__TM7":0.0,"k__Bacteria;p__Tenericutes":383.0,"k__Bacteria;p__Thermotogae":0.0,"k__Bacteria;p__Verrucomicrobia":0.0,"k__Bacteria;p__WPS-2":0.0,"k__Bacteria;p__WS6":0.0,"k__Bacteria;p__WWE1":0.0,"plant type":"Biogas","plant no.":"#12"},{"index":"13_U341F-U806R-NW3-15","k__Archaea;p__Crenarchaeota":0.0,"k__Archaea;p__Euryarchaeota":621.0,"k__Archaea;p__[Parvarchaeota]":0.0,"k__Bacteria;__":34.0,"k__Bacteria;p__":451.0,"k__Bacteria;p__Acidobacteria":0.0,"k__Bacteria;p__Actinobacteria":35.0,"k__Bacteria;p__Armatimonadetes":0.0,"k__Bacteria;p__Bacteroidetes":1673.0,"k__Bacteria;p__Caldiserica":0.0,"k__Bacteria;p__Chlorobi":0.0,"k__Bacteria;p__Chloroflexi":0.0,"k__Bacteria;p__Cyanobacteria":0.0,"k__Bacteria;p__EM3":0.0,"k__Bacteria;p__Fibrobacteres":0.0,"k__Bacteria;p__Firmicutes":9455.0,"k__Bacteria;p__NKB19":0.0,"k__Bacteria;p__OD1":0.0,"k__Bacteria;p__OP1":0.0,"k__Bacteria;p__OP8":0.0,"k__Bacteria;p__OP9":74.0,"k__Bacteria;p__Proteobacteria":0.0,"k__Bacteria;p__SAR406":0.0,"k__Bacteria;p__SR1":0.0,"k__Bacteria;p__Spirochaetes":5.0,"k__Bacteria;p__Synergistetes":70.0,"k__Bacteria;p__TA06":0.0,"k__Bacteria;p__TM7":0.0,"k__Bacteria;p__Tenericutes":301.0,"k__Bacteria;p__Thermotogae":0.0,"k__Bacteria;p__Verrucomicrobia":0.0,"k__Bacteria;p__WPS-2":0.0,"k__Bacteria;p__WS6":2.0,"k__Bacteria;p__WWE1":8.0,"plant type":"Biogas","plant no.":"#13"},{"index":"14_U341F-U806R-NW3-7","k__Archaea;p__Crenarchaeota":0.0,"k__Archaea;p__Euryarchaeota":804.0,"k__Archaea;p__[Parvarchaeota]":0.0,"k__Bacteria;__":224.0,"k__Bacteria;p__":905.0,"k__Bacteria;p__Acidobacteria":19.0,"k__Bacteria;p__Actinobacteria":351.0,"k__Bacteria;p__Armatimonadetes":8.0,"k__Bacteria;p__Bacteroidetes":2487.0,"k__Bacteria;p__Caldiserica":31.0,"k__Bacteria;p__Chlorobi":16.0,"k__Bacteria;p__Chloroflexi":441.0,"k__Bacteria;p__Cyanobacteria":0.0,"k__Bacteria;p__EM3":793.0,"k__Bacteria;p__Fibrobacteres":0.0,"k__Bacteria;p__Firmicutes":4075.0,"k__Bacteria;p__NKB19":0.0,"k__Bacteria;p__OD1":313.0,"k__Bacteria;p__OP1":20.0,"k__Bacteria;p__OP8":304.0,"k__Bacteria;p__OP9":85.0,"k__Bacteria;p__Proteobacteria":357.0,"k__Bacteria;p__SAR406":8.0,"k__Bacteria;p__SR1":0.0,"k__Bacteria;p__Spirochaetes":501.0,"k__Bacteria;p__Synergistetes":168.0,"k__Bacteria;p__TA06":5.0,"k__Bacteria;p__TM7":141.0,"k__Bacteria;p__Tenericutes":4.0,"k__Bacteria;p__Thermotogae":225.0,"k__Bacteria;p__Verrucomicrobia":0.0,"k__Bacteria;p__WPS-2":4.0,"k__Bacteria;p__WS6":28.0,"k__Bacteria;p__WWE1":2349.0,"plant type":"SSD","plant no.":"#14"},{"index":"15_U341F-U806R-NW3-13","k__Archaea;p__Crenarchaeota":0.0,"k__Archaea;p__Euryarchaeota":308.0,"k__Archaea;p__[Parvarchaeota]":5.0,"k__Bacteria;__":0.0,"k__Bacteria;p__":16.0,"k__Bacteria;p__Acidobacteria":14.0,"k__Bacteria;p__Actinobacteria":998.0,"k__Bacteria;p__Armatimonadetes":0.0,"k__Bacteria;p__Bacteroidetes":1527.0,"k__Bacteria;p__Caldiserica":0.0,"k__Bacteria;p__Chlorobi":33.0,"k__Bacteria;p__Chloroflexi":176.0,"k__Bacteria;p__Cyanobacteria":0.0,"k__Bacteria;p__EM3":0.0,"k__Bacteria;p__Fibrobacteres":0.0,"k__Bacteria;p__Firmicutes":1375.0,"k__Bacteria;p__NKB19":11.0,"k__Bacteria;p__OD1":0.0,"k__Bacteria;p__OP1":0.0,"k__Bacteria;p__OP8":0.0,"k__Bacteria;p__OP9":29.0,"k__Bacteria;p__Proteobacteria":83.0,"k__Bacteria;p__SAR406":0.0,"k__Bacteria;p__SR1":260.0,"k__Bacteria;p__Spirochaetes":5.0,"k__Bacteria;p__Synergistetes":549.0,"k__Bacteria;p__TA06":0.0,"k__Bacteria;p__TM7":53.0,"k__Bacteria;p__Tenericutes":4.0,"k__Bacteria;p__Thermotogae":0.0,"k__Bacteria;p__Verrucomicrobia":0.0,"k__Bacteria;p__WPS-2":0.0,"k__Bacteria;p__WS6":0.0,"k__Bacteria;p__WWE1":28.0,"plant type":"SSD","plant no.":"#15"}]);
