# Supplementary material for: Arsenic metabolism in technical biogas plants: possible consequences for resident microbiota and downstream units
Source: AMB Express. 2019 Nov 28;9:190. doi: 10.1186/s13568-019-0902-6 (PMC6882981; doi:10.1186/s13568-019-0902-6)
Supplement: Supplementary file 2 — Additional file 2. Additional electronic material, which provides full dataset of Figure 1 (Qiime2 files). [file 13568_2019_902_MOESM2_ESM.qzv › 41ab44e8-4670-4568-81db-98b188333850/data/level-3.csv]

index	k__Archaea;p__Crenarchaeota;c__MCG	k__Archaea;p__Euryarchaeota;c__Methanobacteria	k__Archaea;p__Euryarchaeota;c__Methanomicrobia	k__Archaea;p__Euryarchaeota;c__Thermoplasmata	k__Archaea;p__[Parvarchaeota];c__[Parvarchaea]	k__Bacteria;__;__	k__Bacteria;p__;c__	k__Bacteria;p__Acidobacteria;c__BPC102	k__Bacteria;p__Acidobacteria;c__Solibacteres	k__Bacteria;p__Acidobacteria;c__[Chloracidobacteria]	k__Bacteria;p__Actinobacteria;c__	k__Bacteria;p__Actinobacteria;c__Acidimicrobiia	k__Bacteria;p__Actinobacteria;c__Actinobacteria	k__Bacteria;p__Actinobacteria;c__Coriobacteriia	k__Bacteria;p__Armatimonadetes;c__SJA-176	k__Bacteria;p__Bacteroidetes;__	k__Bacteria;p__Bacteroidetes;c__Bacteroidia	k__Bacteria;p__Bacteroidetes;c__Flavobacteriia	k__Bacteria;p__Bacteroidetes;c__Sphingobacteriia	k__Bacteria;p__Bacteroidetes;c__[Saprospirae]	k__Bacteria;p__Caldiserica;c__OP5	k__Bacteria;p__Caldiserica;c__TTA-B1	k__Bacteria;p__Chlorobi;c__Ignavibacteria	k__Bacteria;p__Chlorobi;c__SJA-28	k__Bacteria;p__Chloroflexi;c__	k__Bacteria;p__Chloroflexi;c__Anaerolineae	k__Bacteria;p__Chloroflexi;c__Dehalococcoidetes	k__Bacteria;p__Chloroflexi;c__Ellin6529	k__Bacteria;p__Chloroflexi;c__TK17	k__Bacteria;p__Chloroflexi;c__Thermomicrobia	k__Bacteria;p__Cyanobacteria;c__Chloroplast	k__Bacteria;p__EM3;c__	k__Bacteria;p__Fibrobacteres;c__Fibrobacteria	k__Bacteria;p__Fibrobacteres;c__TG3	k__Bacteria;p__Firmicutes;c__Bacilli	k__Bacteria;p__Firmicutes;c__Clostridia	k__Bacteria;p__Firmicutes;c__Erysipelotrichi	k__Bacteria;p__Firmicutes;c__OPB54	k__Bacteria;p__NKB19;c__noFP_H4	k__Bacteria;p__OD1;c__	k__Bacteria;p__OD1;c__ABY1	k__Bacteria;p__OP1;c__OPB14	k__Bacteria;p__OP8;c__OP8_1	k__Bacteria;p__OP9;c__JS1	k__Bacteria;p__OP9;c__OPB46	k__Bacteria;p__Proteobacteria;c__Alphaproteobacteria	k__Bacteria;p__Proteobacteria;c__Betaproteobacteria	k__Bacteria;p__Proteobacteria;c__Deltaproteobacteria	k__Bacteria;p__Proteobacteria;c__Epsilonproteobacteria
01_U341F-U806R-NW3-1	0.0	0.0	97.0	0.0	0.0	0.0	35.0	0.0	0.0	0.0	0.0	0.0	9.0	0.0	0.0	117.0	315.0	0.0	0.0	0.0	0.0	0.0	0.0	0.0	0.0	0.0	0.0	0.0	0.0	0.0	0.0	0.0	0.0	10.0	28.0	1683.0	0.0	5.0	0.0	0.0	0.0	0.0	0.0	0.0	55.0	0.0	0.0	0.0	0.0
02_U341F-U806R-NW3-2	22.0	24.0	295.0	0.0	0.0	191.0	169.0	54.0	0.0	0.0	0.0	0.0	89.0	62.0	0.0	7.0	2864.0	0.0	0.0	0.0	0.0	0.0	0.0	0.0	0.0	20.0	6.0	0.0	0.0	0.0	0.0	0.0	11.0	92.0	35.0	6600.0	37.0	23.0	5.0	0.0	5.0	0.0	0.0	0.0	26.0	0.0	0.0	27.0	0.0
03_U341F-U806R-NW3-3	0.0	0.0	1456.0	0.0	0.0	8.0	213.0	0.0	0.0	0.0	0.0	0.0	0.0	0.0	0.0	133.0	1042.0	0.0	7.0	0.0	0.0	0.0	0.0	0.0	0.0	0.0	0.0	0.0	0.0	0.0	0.0	0.0	0.0	5.0	55.0	7321.0	61.0	59.0	0.0	0.0	0.0	0.0	0.0	0.0	48.0	0.0	0.0	0.0	0.0
04_U341F-U806R-NW3-4	0.0	66.0	37.0	0.0	0.0	118.0	372.0	0.0	0.0	0.0	0.0	0.0	102.0	13.0	0.0	1788.0	2257.0	0.0	0.0	0.0	0.0	0.0	0.0	0.0	0.0	0.0	0.0	0.0	0.0	0.0	0.0	0.0	10.0	0.0	1149.0	4603.0	384.0	47.0	0.0	0.0	0.0	0.0	0.0	0.0	0.0	0.0	9.0	0.0	0.0
05_U341F-U806R-NW3-5	0.0	0.0	0.0	0.0	0.0	52.0	28.0	0.0	0.0	0.0	0.0	0.0	0.0	0.0	0.0	181.0	233.0	0.0	0.0	0.0	0.0	0.0	0.0	0.0	0.0	0.0	0.0	0.0	0.0	0.0	0.0	0.0	0.0	0.0	56.0	4643.0	195.0	34.0	0.0	0.0	0.0	0.0	0.0	0.0	9.0	0.0	0.0	0.0	0.0
06_U341F-U806R-NW3-6	13.0	8.0	1081.0	0.0	0.0	145.0	310.0	17.0	0.0	0.0	0.0	0.0	24.0	37.0	0.0	10.0	2421.0	0.0	0.0	0.0	0.0	0.0	0.0	0.0	0.0	0.0	8.0	0.0	0.0	0.0	0.0	0.0	7.0	50.0	40.0	5859.0	29.0	3.0	0.0	0.0	12.0	0.0	0.0	0.0	21.0	0.0	0.0	0.0	15.0
07_U341F-U806R-NW3-8	0.0	0.0	100.0	0.0	0.0	19.0	91.0	0.0	0.0	0.0	0.0	0.0	0.0	0.0	0.0	851.0	1774.0	0.0	0.0	0.0	0.0	0.0	0.0	0.0	0.0	0.0	0.0	0.0	0.0	0.0	0.0	0.0	0.0	0.0	34.0	9028.0	0.0	77.0	0.0	0.0	0.0	0.0	0.0	0.0	16.0	0.0	0.0	0.0	0.0
08_U341F-U806R-NW3-9	0.0	0.0	0.0	0.0	0.0	0.0	76.0	0.0	0.0	0.0	0.0	0.0	0.0	0.0	0.0	298.0	105.0	0.0	0.0	0.0	0.0	0.0	0.0	0.0	0.0	0.0	0.0	0.0	0.0	0.0	0.0	0.0	0.0	0.0	0.0	2521.0	0.0	21.0	0.0	0.0	0.0	0.0	0.0	0.0	0.0	0.0	0.0	0.0	0.0
09_U341F-U806R-NW3-10	8.0	51.0	718.0	0.0	0.0	68.0	208.0	54.0	0.0	0.0	0.0	0.0	30.0	48.0	0.0	0.0	4115.0	0.0	0.0	0.0	0.0	0.0	0.0	0.0	0.0	0.0	0.0	0.0	0.0	0.0	2.0	0.0	5.0	77.0	117.0	4558.0	80.0	34.0	5.0	0.0	0.0	0.0	0.0	0.0	11.0	3.0	0.0	9.0	0.0
10_U341F-U806R-NW3-11	0.0	81.0	0.0	0.0	0.0	20.0	442.0	0.0	0.0	0.0	0.0	0.0	0.0	0.0	0.0	885.0	424.0	0.0	0.0	0.0	0.0	0.0	0.0	0.0	0.0	0.0	0.0	0.0	0.0	0.0	0.0	0.0	0.0	0.0	47.0	7938.0	0.0	133.0	0.0	0.0	0.0	0.0	0.0	0.0	15.0	0.0	0.0	0.0	0.0
11_U341F-U806R-NW3-12	0.0	0.0	29.0	6.0	0.0	126.0	266.0	19.0	0.0	0.0	0.0	0.0	0.0	0.0	0.0	226.0	1192.0	0.0	0.0	0.0	0.0	0.0	0.0	0.0	0.0	0.0	0.0	0.0	0.0	0.0	0.0	0.0	7.0	22.0	64.0	8606.0	51.0	107.0	0.0	32.0	0.0	0.0	0.0	0.0	57.0	0.0	0.0	0.0	0.0
12_U341F-U806R-NW3-14	0.0	15.0	25.0	0.0	0.0	21.0	247.0	0.0	0.0	0.0	0.0	0.0	0.0	0.0	0.0	307.0	2358.0	0.0	0.0	0.0	0.0	0.0	0.0	0.0	0.0	0.0	0.0	0.0	0.0	0.0	0.0	0.0	0.0	0.0	87.0	7270.0	21.0	94.0	0.0	10.0	0.0	0.0	0.0	0.0	7.0	0.0	0.0	0.0	0.0
13_U341F-U806R-NW3-15	0.0	10.0	607.0	4.0	0.0	34.0	451.0	0.0	0.0	0.0	0.0	0.0	35.0	0.0	0.0	822.0	851.0	0.0	0.0	0.0	0.0	0.0	0.0	0.0	0.0	0.0	0.0	0.0	0.0	0.0	0.0	0.0	0.0	0.0	507.0	8825.0	19.0	104.0	0.0	0.0	0.0	0.0	0.0	0.0	74.0	0.0	0.0	0.0	0.0
14_U341F-U806R-NW3-7	0.0	13.0	791.0	0.0	0.0	224.0	905.0	10.0	9.0	0.0	16.0	112.0	223.0	0.0	8.0	8.0	2446.0	0.0	0.0	33.0	17.0	14.0	0.0	16.0	6.0	432.0	0.0	3.0	0.0	0.0	0.0	793.0	0.0	0.0	57.0	4018.0	0.0	0.0	0.0	313.0	0.0	20.0	304.0	5.0	80.0	23.0	120.0	97.0	14.0
15_U341F-U806R-NW3-13	0.0	14.0	294.0	0.0	5.0	0.0	16.0	0.0	0.0	14.0	0.0	110.0	888.0	0.0	0.0	0.0	1496.0	11.0	0.0	20.0	0.0	0.0	33.0	0.0	0.0	144.0	0.0	0.0	4.0	28.0	0.0	0.0	0.0	0.0	14.0	1361.0	0.0	0.0	11.0	0.0	0.0	0.0	0.0	10.0	19.0	58.0	5.0	8.0	0.0
[truncated: 20 more columns]
