# Supplementary material for: Arsenic metabolism in technical biogas plants: possible consequences for resident microbiota and downstream units
Source: AMB Express. 2019 Nov 28;9:190. doi: 10.1186/s13568-019-0902-6 (PMC6882981; doi:10.1186/s13568-019-0902-6)
Supplement: Supplementary file 2 — Additional file 2. Additional electronic material, which provides full dataset of Figure 1 (Qiime2 files). [file 13568_2019_902_MOESM2_ESM.qzv › 41ab44e8-4670-4568-81db-98b188333850/data/level-3.jsonp]

load_data(3,["k__Archaea;p__Crenarchaeota;c__MCG", "k__Archaea;p__Euryarchaeota;c__Methanobacteria", "k__Archaea;p__Euryarchaeota;c__Methanomicrobia", "k__Archaea;p__Euryarchaeota;c__Thermoplasmata", "k__Archaea;p__[Parvarchaeota];c__[Parvarchaea]", "k__Bacteria;__;__", "k__Bacteria;p__;c__", "k__Bacteria;p__Acidobacteria;c__BPC102", "k__Bacteria;p__Acidobacteria;c__Solibacteres", "k__Bacteria;p__Acidobacteria;c__[Chloracidobacteria]", "k__Bacteria;p__Actinobacteria;c__", "k__Bacteria;p__Actinobacteria;c__Acidimicrobiia", "k__Bacteria;p__Actinobacteria;c__Actinobacteria", "k__Bacteria;p__Actinobacteria;c__Coriobacteriia", "k__Bacteria;p__Armatimonadetes;c__SJA-176", "k__Bacteria;p__Bacteroidetes;__", "k__Bacteria;p__Bacteroidetes;c__Bacteroidia", "k__Bacteria;p__Bacteroidetes;c__Flavobacteriia", "k__Bacteria;p__Bacteroidetes;c__Sphingobacteriia", "k__Bacteria;p__Bacteroidetes;c__[Saprospirae]", "k__Bacteria;p__Caldiserica;c__OP5", "k__Bacteria;p__Caldiserica;c__TTA-B1", "k__Bacteria;p__Chlorobi;c__Ignavibacteria", "k__Bacteria;p__Chlorobi;c__SJA-28", "k__Bacteria;p__Chloroflexi;c__", "k__Bacteria;p__Chloroflexi;c__Anaerolineae", "k__Bacteria;p__Chloroflexi;c__Dehalococcoidetes", "k__Bacteria;p__Chloroflexi;c__Ellin6529", "k__Bacteria;p__Chloroflexi;c__TK17", "k__Bacteria;p__Chloroflexi;c__Thermomicrobia", "k__Bacteria;p__Cyanobacteria;c__Chloroplast", "k__Bacteria;p__EM3;c__", "k__Bacteria;p__Fibrobacteres;c__Fibrobacteria", "k__Bacteria;p__Fibrobacteres;c__TG3", "k__Bacteria;p__Firmicutes;c__Bacilli", "k__Bacteria;p__Firmicutes;c__Clostridia", "k__Bacteria;p__Firmicutes;c__Erysipelotrichi", "k__Bacteria;p__Firmicutes;c__OPB54", "k__Bacteria;p__NKB19;c__noFP_H4", "k__Bacteria;p__OD1;c__", "k__Bacteria;p__OD1;c__ABY1", "k__Bacteria;p__OP1;c__OPB14", "k__Bacteria;p__OP8;c__OP8_1", "k__Bacteria;p__OP9;c__JS1", "k__Bacteria;p__OP9;c__OPB46", "k__Bacteria;p__Proteobacteria;c__Alphaproteobacteria", "k__Bacteria;p__Proteobacteria;c__Betaproteobacteria", "k__Bacteria;p__Proteobacteria;c__Deltaproteobacteria", "k__Bacteria;p__Proteobacteria;c__Epsilonproteobacteria", "k__Bacteria;p__Proteobacteria;c__Gammaproteobacteria", "k__Bacteria;p__SAR406;c__AB16", "k__Bacteria;p__SR1;c__", "k__Bacteria;p__Spirochaetes;c__MVP-15", "k__Bacteria;p__Spirochaetes;c__Spirochaetes", "k__Bacteria;p__Spirochaetes;c__[Leptospirae]", "k__Bacteria;p__Synergistetes;c__Synergistia", "k__Bacteria;p__TA06;c__", "k__Bacteria;p__TM7;c__TM7-1", "k__Bacteria;p__TM7;c__TM7-3", "k__Bacteria;p__Tenericutes;c__Mollicutes", "k__Bacteria;p__Tenericutes;c__RF3", "k__Bacteria;p__Thermotogae;c__Thermotogae", "k__Bacteria;p__Verrucomicrobia;c__Verruco-5", "k__Bacteria;p__Verrucomicrobia;c__[Pedosphaerae]", "k__Bacteria;p__WPS-2;c__", "k__Bacteria;p__WS6;c__SC72", "k__Bacteria;p__WWE1;c__[Cloacamonae]"],["index", "k__Archaea;p__Crenarchaeota;c__MCG", "k__Archaea;p__Euryarchaeota;c__Methanobacteria", "k__Archaea;p__Euryarchaeota;c__Methanomicrobia", "k__Archaea;p__Euryarchaeota;c__Thermoplasmata", "k__Archaea;p__[Parvarchaeota];c__[Parvarchaea]", "k__Bacteria;__;__", "k__Bacteria;p__;c__", "k__Bacteria;p__Acidobacteria;c__BPC102", "k__Bacteria;p__Acidobacteria;c__Solibacteres", "k__Bacteria;p__Acidobacteria;c__[Chloracidobacteria]", "k__Bacteria;p__Actinobacteria;c__", "k__Bacteria;p__Actinobacteria;c__Acidimicrobiia", "k__Bacteria;p__Actinobacteria;c__Actinobacteria", "k__Bacteria;p__Actinobacteria;c__Coriobacteriia", "k__Bacteria;p__Armatimonadetes;c__SJA-176", "k__Bacteria;p__Bacteroidetes;__", "k__Bacteria;p__Bacteroidetes;c__Bacteroidia", "k__Bacteria;p__Bacteroidetes;c__Flavobacteriia", "k__Bacteria;p__Bacteroidetes;c__Sphingobacteriia", "k__Bacteria;p__Bacteroidetes;c__[Saprospirae]", "k__Bacteria;p__Caldiserica;c__OP5", "k__Bacteria;p__Caldiserica;c__TTA-B1", "k__Bacteria;p__Chlorobi;c__Ignavibacteria", "k__Bacteria;p__Chlorobi;c__SJA-28", "k__Bacteria;p__Chloroflexi;c__", "k__Bacteria;p__Chloroflexi;c__Anaerolineae", "k__Bacteria;p__Chloroflexi;c__Dehalococcoidetes", "k__Bacteria;p__Chloroflexi;c__Ellin6529", "k__Bacteria;p__Chloroflexi;c__TK17", "k__Bacteria;p__Chloroflexi;c__Thermomicrobia", "k__Bacteria;p__Cyanobacteria;c__Chloroplast", "k__Bacteria;p__EM3;c__", "k__Bacteria;p__Fibrobacteres;c__Fibrobacteria", "k__Bacteria;p__Fibrobacteres;c__TG3", "k__Bacteria;p__Firmicutes;c__Bacilli", "k__Bacteria;p__Firmicutes;c__Clostridia", "k__Bacteria;p__Firmicutes;c__Erysipelotrichi", "k__Bacteria;p__Firmicutes;c__OPB54", "k__Bacteria;p__NKB19;c__noFP_H4", "k__Bacteria;p__OD1;c__", "k__Bacteria;p__OD1;c__ABY1", "k__Bacteria;p__OP1;c__OPB14", "k__Bacteria;p__OP8;c__OP8_1", "k__Bacteria;p__OP9;c__JS1", "k__Bacteria;p__OP9;c__OPB46", "k__Bacteria;p__Proteobacteria;c__Alphaproteobacteria", "k__Bacteria;p__Proteobacteria;c__Betaproteobacteria", "k__Bacteria;p__Proteobacteria;c__Deltaproteobacteria", "k__Bacteria;p__Proteobacteria;c__Epsilonproteobacteria", "k__Bacteria;p__Proteobacteria;c__Gammaproteobacteria", "k__Bacteria;p__SAR406;c__AB16", "k__Bacteria;p__SR1;c__", "k__Bacteria;p__Spirochaetes;c__MVP-15", "k__Bacteria;p__Spirochaetes;c__Spirochaetes", "k__Bacteria;p__Spirochaetes;c__[Leptospirae]", "k__Bacteria;p__Synergistetes;c__Synergistia", "k__Bacteria;p__TA06;c__", "k__Bacteria;p__TM7;c__TM7-1", "k__Bacteria;p__TM7;c__TM7-3", "k__Bacteria;p__Tenericutes;c__Mollicutes", "k__Bacteria;p__Tenericutes;c__RF3", "k__Bacteria;p__Thermotogae;c__Thermotogae", "k__Bacteria;p__Verrucomicrobia;c__Verruco-5", "k__Bacteria;p__Verrucomicrobia;c__[Pedosphaerae]", "k__Bacteria;p__WPS-2;c__", "k__Bacteria;p__WS6;c__SC72", "k__Bacteria;p__WWE1;c__[Cloacamonae]", "plant type", "plant no."],[{"index":"01_U341F-U806R-NW3-1","k__Archaea;p__Crenarchaeota;c__MCG":0.0,"k__Archaea;p__Euryarchaeota;c__Methanobacteria":0.0,"k__Archaea;p__Euryarchaeota;c__Methanomicrobia":97.0,"k__Archaea;p__Euryarchaeota;c__Thermoplasmata":0.0,"k__Archaea;p__[Parvarchaeota];c__[Parvarchaea]":0.0,"k__Bacteria;__;__":0.0,"k__Bacteria;p__;c__":35.0,"k__Bacteria;p__Acidobacteria;c__BPC102":0.0,"k__Bacteria;p__Acidobacteria;c__Solibacteres":0.0,"k__Bacteria;p__Acidobacteria;c__[Chloracidobacteria]":0.0,"k__Bacteria;p__Actinobacteria;c__":0.0,"k__Bacteria;p__Actinobacteria;c__Acidimicrobiia":0.0,"k__Bacteria;p__Actinobacteria;c__Actinobacteria":9.0,"k__Bacteria;p__Actinobacteria;c__Coriobacteriia":0.0,"k__Bacteria;p__Armatimonadetes;c__SJA-176":0.0,"k__Bacteria;p__Bacteroidetes;__":117.0,"k__Bacteria;p__Bacteroidetes;c__Bacteroidia":315.0,"k__Bacteria;p__Bacteroidetes;c__Flavobacteriia":0.0,"k__Bacteria;p__Bacteroidetes;c__Sphingobacteriia":0.0,"k__Bacteria;p__Bacteroidetes;c__[Saprospirae]":0.0,"k__Bacteria;p__Caldiserica;c__OP5":0.0,"k__Bacteria;p__Caldiserica;c__TTA-B1":0.0,"k__Bacteria;p__Chlorobi;c__Ignavibacteria":0.0,"k__Bacteria;p__Chlorobi;c__SJA-28":0.0,"k__Bacteria;p__Chloroflexi;c__":0.0,"k__Bacteria;p__Chloroflexi;c__Anaerolineae":0.0,"k__Bacteria;p__Chloroflexi;c__Dehalococcoidetes":0.0,"k__Bacteria;p__Chloroflexi;c__Ellin6529":0.0,"k__Bacteria;p__Chloroflexi;c__TK17":0.0,"k__Bacteria;p__Chloroflexi;c__Thermomicrobia":0.0,"k__Bacteria;p__Cyanobacteria;c__Chloroplast":0.0,"k__Bacteria;p__EM3;c__":0.0,"k__Bacteria;p__Fibrobacteres;c__Fibrobacteria":0.0,"k__Bacteria;p__Fibrobacteres;c__TG3":10.0,"k__Bacteria;p__Firmicutes;c__Bacilli":28.0,"k__Bacteria;p__Firmicutes;c__Clostridia":1683.0,"k__Bacteria;p__Firmicutes;c__Erysipelotrichi":0.0,"k__Bacteria;p__Firmicutes;c__OPB54":5.0,"k__Bacteria;p__NKB19;c__noFP_H4":0.0,"k__Bacteria;p__OD1;c__":0.0,"k__Bacteria;p__OD1;c__ABY1":0.0,"k__Bacteria;p__OP1;c__OPB14":0.0,"k__Bacteria;p__OP8;c__OP8_1":0.0,"k__Bacteria;p__OP9;c__JS1":0.0,"k__Bacteria;p__OP9;c__OPB46":55.0,"k__Bacteria;p__Proteobacteria;c__Alphaproteobacteria":0.0,"k__Bacteria;p__Proteobacteria;c__Betaproteobacteria":0.0,"k__Bacteria;p__Proteobacteria;c__Deltaproteobacteria":0.0,"k__Bacteria;p__Proteobacteria;c__Epsilonproteobacteria":0.0,"k__Bacteria;p__Proteobacteria;c__Gammaproteobacteria":0.0,"k__Bacteria;p__SAR406;c__AB16":0.0,"k__Bacteria;p__SR1;c__":2.0,"k__Bacteria;p__Spirochaetes;c__MVP-15":0.0,"k__Bacteria;p__Spirochaetes;c__Spirochaetes":10.0,"k__Bacteria;p__Spirochaetes;c__[Leptospirae]":0.0,"k__Bacteria;p__Synergistetes;c__Synergistia":111.0,"k__Bacteria;p__TA06;c__":0.0,"k__Bacteria;p__TM7;c__TM7-1":0.0,"k__Bacteria;p__TM7;c__TM7-3":0.0,"k__Bacteria;p__Tenericutes;c__Mollicutes":0.0,"k__Bacteria;p__Tenericutes;c__RF3":16.0,"k__Bacteria;p__Thermotogae;c__Thermotogae":110.0,"k__Bacteria;p__Verrucomicrobia;c__Verruco-5":0.0,"k__Bacteria;p__Verrucomicrobia;c__[Pedosphaerae]":0.0,"k__Bacteria;p__WPS-2;c__":0.0,"k__Bacteria;p__WS6;c__SC72":0.0,"k__Bacteria;p__WWE1;c__[Cloacamonae]":41.0,"plant type":"Biogas","plant no.":"#01"},{"index":"02_U341F-U806R-NW3-2","k__Archaea;p__Crenarchaeota;c__MCG":22.0,"k__Archaea;p__Euryarchaeota;c__Methanobacteria":24.0,"k__Archaea;p__Euryarchaeota;c__Methanomicrobia":295.0,"k__Archaea;p__Euryarchaeota;c__Thermoplasmata":0.0,"k__Archaea;p__[Parvarchaeota];c__[Parvarchaea]":0.0,"k__Bacteria;__;__":191.0,"k__Bacteria;p__;c__":169.0,"k__Bacteria;p__Acidobacteria;c__BPC102":54.0,"k__Bacteria;p__Acidobacteria;c__Solibacteres":0.0,"k__Bacteria;p__Acidobacteria;c__[Chloracidobacteria]":0.0,"k__Bacteria;p__Actinobacteria;c__":0.0,"k__Bacteria;p__Actinobacteria;c__Acidimicrobiia":0.0,"k__Bacteria;p__Actinobacteria;c__Actinobacteria":89.0,"k__Bacteria;p__Actinobacteria;c__Coriobacteriia":62.0,"k__Bacteria;p__Armatimonadetes;c__SJA-176":0.0,"k__Bacteria;p__Bacteroidetes;__":7.0,"k__Bacteria;p__Bacteroidetes;c__Bacteroidia":2864.0,"k__Bacteria;p__Bacteroidetes;c__Flavobacteriia":0.0,"k__Bacteria;p__Bacteroidetes;c__Sphingobacteriia":0.0,"k__Bacteria;p__Bacteroidetes;c__[Saprospirae]":0.0,"k__Bacteria;p__Caldiserica;c__OP5":0.0,"k__Bacteria;p__Caldiserica;c__TTA-B1":0.0,"k__Bacteria;p__Chlorobi;c__Ignavibacteria":0.0,"k__Bacteria;p__Chlorobi;c__SJA-28":0.0,"k__Bacteria;p__Chloroflexi;c__":0.0,"k__Bacteria;p__Chloroflexi;c__Anaerolineae":20.0,"k__Bacteria;p__Chloroflexi;c__Dehalococcoidetes":6.0,"k__Bacteria;p__Chloroflexi;c__Ellin6529":0.0,"k__Bacteria;p__Chloroflexi;c__TK17":0.0,"k__Bacteria;p__Chloroflexi;c__Thermomicrobia":0.0,"k__Bacteria;p__Cyanobacteria;c__Chloroplast":0.0,"k__Bacteria;p__EM3;c__":0.0,"k__Bacteria;p__Fibrobacteres;c__Fibrobacteria":11.0,"k__Bacteria;p__Fibrobacteres;c__TG3":92.0,"k__Bacteria;p__Firmicutes;c__Bacilli":35.0,"k__Bacteria;p__Firmicutes;c__Clostridia":6600.0,"k__Bacteria;p__Firmicutes;c__Erysipelotrichi":37.0,"k__Bacteria;p__Firmicutes;c__OPB54":23.0,"k__Bacteria;p__NKB19;c__noFP_H4":5.0,"k__Bacteria;p__OD1;c__":0.0,"k__Bacteria;p__OD1;c__ABY1":5.0,"k__Bacteria;p__OP1;c__OPB14":0.0,"k__Bacteria;p__OP8;c__OP8_1":0.0,"k__Bacteria;p__OP9;c__JS1":0.0,"k__Bacteria;p__OP9;c__OPB46":26.0,"k__Bacteria;p__Proteobacteria;c__Alphaproteobacteria":0.0,"k__Bacteria;p__Proteobacteria;c__Betaproteobacteria":0.0,"k__Bacteria;p__Proteobacteria;c__Deltaproteobacteria":27.0,"k__Bacteria;p__Proteobacteria;c__Epsilonproteobacteria":0.0,"k__Bacteria;p__Proteobacteria;c__Gammaproteobacteria":0.0,"k__Bacteria;p__SAR406;c__AB16":0.0,"k__Bacteria;p__SR1;c__":39.0,"k__Bacteria;p__Spirochaetes;c__MVP-15":16.0,"k__Bacteria;p__Spirochaetes;c__Spirochaetes":81.0,"k__Bacteria;p__Spirochaetes;c__[Leptospirae]":0.0,"k__Bacteria;p__Synergistetes;c__Synergistia":64.0,"k__Bacteria;p__TA06;c__":0.0,"k__Bacteria;p__TM7;c__TM7-1":0.0,"k__Bacteria;p__TM7;c__TM7-3":0.0,"k__Bacteria;p__Tenericutes;c__Mollicutes":31.0,"k__Bacteria;p__Tenericutes;c__RF3":62.0,"k__Bacteria;p__Thermotogae;c__Thermotogae":5.0,"k__Bacteria;p__Verrucomicrobia;c__Verruco-5":0.0,"k__Bacteria;p__Verrucomicrobia;c__[Pedosphaerae]":0.0,"k__Bacteria;p__WPS-2;c__":4.0,"k__Bacteria;p__WS6;c__SC72":23.0,"k__Bacteria;p__WWE1;c__[Cloacamonae]":1877.0,"plant type":"Biogas","plant no.":"#02"},{"index":"03_U341F-U806R-NW3-3","k__Archaea;p__Crenarchaeota;c__MCG":0.0,"k__Archaea;p__Euryarchaeota;c__Methanobacteria":0.0,"k__Archaea;p__Euryarchaeota;c__Methanomicrobia":1456.0,"k__Archaea;p__Euryarchaeota;c__Thermoplasmata":0.0,"k__Archaea;p__[Parvarchaeota];c__[Parvarchaea]":0.0,"k__Bacteria;__;__":8.0,"k__Bacteria;p__;c__":213.0,"k__Bacteria;p__Acidobacteria;c__BPC102":0.0,"k__Bacteria;p__Acidobacteria;c__Solibacteres":0.0,"k__Bacteria;p__Acidobacteria;c__[Chloracidobacteria]":0.0,"k__Bacteria;p__Actinobacteria;c__":0.0,"k__Bacteria;p__Actinobacteria;c__Acidimicrobiia":0.0,"k__Bacteria;p__Actinobacteria;c__Actinobacteria":0.0,"k__Bacteria;p__Actinobacteria;c__Coriobacteriia":0.0,"k__Bacteria;p__Armatimonadetes;c__SJA-176":0.0,"k__Bacteria;p__Bacteroidetes;__":133.0,"k__Bacteria;p__Bacteroidetes;c__Bacteroidia":1042.0,"k__Bacteria;p__Bacteroidetes;c__Flavobacteriia":0.0,"k__Bacteria;p__Bacteroidetes;c__Sphingobacteriia":7.0,"k__Bacteria;p__Bacteroidetes;c__[Saprospirae]":0.0,"k__Bacteria;p__Caldiserica;c__OP5":0.0,"k__Bacteria;p__Caldiserica;c__TTA-B1":0.0,"k__Bacteria;p__Chlorobi;c__Ignavibacteria":0.0,"k__Bacteria;p__Chlorobi;c__SJA-28":0.0,"k__Bacteria;p__Chloroflexi;c__":0.0,"k__Bacteria;p__Chloroflexi;c__Anaerolineae":0.0,"k__Bacteria;p__Chloroflexi;c__Dehalococcoidetes":0.0,"k__Bacteria;p__Chloroflexi;c__Ellin6529":0.0,"k__Bacteria;p__Chloroflexi;c__TK17":0.0,"k__Bacteria;p__Chloroflexi;c__Thermomicrobia":0.0,"k__Bacteria;p__Cyanobacteria;c__Chloroplast":0.0,"k__Bacteria;p__EM3;c__":0.0,"k__Bacteria;p__Fibrobacteres;c__Fibrobacteria":0.0,"k__Bacteria;p__Fibrobacteres;c__TG3":5.0,"k__Bacteria;p__Firmicutes;c__Bacilli":55.0,"k__Bacteria;p__Firmicutes;c__Clostridia":7321.0,"k__Bacteria;p__Firmicutes;c__Erysipelotrichi":61.0,"k__Bacteria;p__Firmicutes;c__OPB54":59.0,"k__Bacteria;p__NKB19;c__noFP_H4":0.0,"k__Bacteria;p__OD1;c__":0.0,"k__Bacteria;p__OD1;c__ABY1":0.0,"k__Bacteria;p__OP1;c__OPB14":0.0,"k__Bacteria;p__OP8;c__OP8_1":0.0,"k__Bacteria;p__OP9;c__JS1":0.0,"k__Bacteria;p__OP9;c__OPB46":48.0,"k__Bacteria;p__Proteobacteria;c__Alphaproteobacteria":0.0,"k__Bacteria;p__Proteobacteria;c__Betaproteobacteria":0.0,"k__Bacteria;p__Proteobacteria;c__Deltaproteobacteria":0.0,"k__Bacteria;p__Proteobacteria;c__Epsilonproteobacteria":0.0,"k__Bacteria;p__Proteobacteria;c__Gammaproteobacteria":0.0,"k__Bacteria;p__SAR406;c__AB16":0.0,"k__Bacteria;p__SR1;c__":114.0,"k__Bacteria;p__Spirochaetes;c__MVP-15":0.0,"k__Bacteria;p__Spirochaetes;c__Spirochaetes":20.0,"k__Bacteria;p__Spirochaetes;c__[Leptospirae]":0.0,"k__Bacteria;p__Synergistetes;c__Synergistia":83.0,"k__Bacteria;p__TA06;c__":0.0,"k__Bacteria;p__TM7;c__TM7-1":0.0,"k__Bacteria;p__TM7;c__TM7-3":0.0,"k__Bacteria;p__Tenericutes;c__Mollicutes":23.0,"k__Bacteria;p__Tenericutes;c__RF3":60.0,"k__Bacteria;p__Thermotogae;c__Thermotogae":0.0,"k__Bacteria;p__Verrucomicrobia;c__Verruco-5":0.0,"k__Bacteria;p__Verrucomicrobia;c__[Pedosphaerae]":0.0,"k__Bacteria;p__WPS-2;c__":0.0,"k__Bacteria;p__WS6;c__SC72":0.0,"k__Bacteria;p__WWE1;c__[Cloacamonae]":1051.0,"plant type":"Biogas","plant no.":"#02"},{"index":"04_U341F-U806R-NW3-4","k__Archaea;p__Crenarchaeota;c__MCG":0.0,"k__Archaea;p__Euryarchaeota;c__Methanobacteria":66.0,"k__Archaea;p__Euryarchaeota;c__Methanomicrobia":37.0,"k__Archaea;p__Euryarchaeota;c__Thermoplasmata":0.0,"k__Archaea;p__[Parvarchaeota];c__[Parvarchaea]":0.0,"k__Bacteria;__;__":118.0,"k__Bacteria;p__;c__":372.0,"k__Bacteria;p__Acidobacteria;c__BPC102":0.0,"k__Bacteria;p__Acidobacteria;c__Solibacteres":0.0,"k__Bacteria;p__Acidobacteria;c__[Chloracidobacteria]":0.0,"k__Bacteria;p__Actinobacteria;c__":0.0,"k__Bacteria;p__Actinobacteria;c__Acidimicrobiia":0.0,"k__Bacteria;p__Actinobacteria;c__Actinobacteria":102.0,"k__Bacteria;p__Actinobacteria;c__Coriobacteriia":13.0,"k__Bacteria;p__Armatimonadetes;c__SJA-176":0.0,"k__Bacteria;p__Bacteroidetes;__":1788.0,"k__Bacteria;p__Bacteroidetes;c__Bacteroidia":2257.0,"k__Bacteria;p__Bacteroidetes;c__Flavobacteriia":0.0,"k__Bacteria;p__Bacteroidetes;c__Sphingobacteriia":0.0,"k__Bacteria;p__Bacteroidetes;c__[Saprospirae]":0.0,"k__Bacteria;p__Caldiserica;c__OP5":0.0,"k__Bacteria;p__Caldiserica;c__TTA-B1":0.0,"k__Bacteria;p__Chlorobi;c__Ignavibacteria":0.0,"k__Bacteria;p__Chlorobi;c__SJA-28":0.0,"k__Bacteria;p__Chloroflexi;c__":0.0,"k__Bacteria;p__Chloroflexi;c__Anaerolineae":0.0,"k__Bacteria;p__Chloroflexi;c__Dehalococcoidetes":0.0,"k__Bacteria;p__Chloroflexi;c__Ellin6529":0.0,"k__Bacteria;p__Chloroflexi;c__TK17":0.0,"k__Bacteria;p__Chloroflexi;c__Thermomicrobia":0.0,"k__Bacteria;p__Cyanobacteria;c__Chloroplast":0.0,"k__Bacteria;p__EM3;c__":0.0,"k__Bacteria;p__Fibrobacteres;c__Fibrobacteria":10.0,"k__Bacteria;p__Fibrobacteres;c__TG3":0.0,"k__Bacteria;p__Firmicutes;c__Bacilli":1149.0,"k__Bacteria;p__Firmicutes;c__Clostridia":4603.0,"k__Bacteria;p__Firmicutes;c__Erysipelotrichi":384.0,"k__Bacteria;p__Firmicutes;c__OPB54":47.0,"k__Bacteria;p__NKB19;c__noFP_H4":0.0,"k__Bacteria;p__OD1;c__":0.0,"k__Bacteria;p__OD1;c__ABY1":0.0,"k__Bacteria;p__OP1;c__OPB14":0.0,"k__Bacteria;p__OP8;c__OP8_1":0.0,"k__Bacteria;p__OP9;c__JS1":0.0,"k__Bacteria;p__OP9;c__OPB46":0.0,"k__Bacteria;p__Proteobacteria;c__Alphaproteobacteria":0.0,"k__Bacteria;p__Proteobacteria;c__Betaproteobacteria":9.0,"k__Bacteria;p__Proteobacteria;c__Deltaproteobacteria":0.0,"k__Bacteria;p__Proteobacteria;c__Epsilonproteobacteria":0.0,"k__Bacteria;p__Proteobacteria;c__Gammaproteobacteria":35.0,"k__Bacteria;p__SAR406;c__AB16":0.0,"k__Bacteria;p__SR1;c__":61.0,"k__Bacteria;p__Spirochaetes;c__MVP-15":0.0,"k__Bacteria;p__Spirochaetes;c__Spirochaetes":0.0,"k__Bacteria;p__Spirochaetes;c__[Leptospirae]":0.0,"k__Bacteria;p__Synergistetes;c__Synergistia":63.0,"k__Bacteria;p__TA06;c__":0.0,"k__Bacteria;p__TM7;c__TM7-1":0.0,"k__Bacteria;p__TM7;c__TM7-3":0.0,"k__Bacteria;p__Tenericutes;c__Mollicutes":112.0,"k__Bacteria;p__Tenericutes;c__RF3":192.0,"k__Bacteria;p__Thermotogae;c__Thermotogae":173.0,"k__Bacteria;p__Verrucomicrobia;c__Verruco-5":0.0,"k__Bacteria;p__Verrucomicrobia;c__[Pedosphaerae]":0.0,"k__Bacteria;p__WPS-2;c__":0.0,"k__Bacteria;p__WS6;c__SC72":0.0,"k__Bacteria;p__WWE1;c__[Cloacamonae]":104.0,"plant type":"Biogas","plant no.":"#04"},{"index":"05_U341F-U806R-NW3-5","k__Archaea;p__Crenarchaeota;c__MCG":0.0,"k__Archaea;p__Euryarchaeota;c__Methanobacteria":0.0,"k__Archaea;p__Euryarchaeota;c__Methanomicrobia":0.0,"k__Archaea;p__Euryarchaeota;c__Thermoplasmata":0.0,"k__Archaea;p__[Parvarchaeota];c__[Parvarchaea]":0.0,"k__Bacteria;__;__":52.0,"k__Bacteria;p__;c__":28.0,"k__Bacteria;p__Acidobacteria;c__BPC102":0.0,"k__Bacteria;p__Acidobacteria;c__Solibacteres":0.0,"k__Bacteria;p__Acidobacteria;c__[Chloracidobacteria]":0.0,"k__Bacteria;p__Actinobacteria;c__":0.0,"k__Bacteria;p__Actinobacteria;c__Acidimicrobiia":0.0,"k__Bacteria;p__Actinobacteria;c__Actinobacteria":0.0,"k__Bacteria;p__Actinobacteria;c__Coriobacteriia":0.0,"k__Bacteria;p__Armatimonadetes;c__SJA-176":0.0,"k__Bacteria;p__Bacteroidetes;__":181.0,"k__Bacteria;p__Bacteroidetes;c__Bacteroidia":233.0,"k__Bacteria;p__Bacteroidetes;c__Flavobacteriia":0.0,"k__Bacteria;p__Bacteroidetes;c__Sphingobacteriia":0.0,"k__Bacteria;p__Bacteroidetes;c__[Saprospirae]":0.0,"k__Bacteria;p__Caldiserica;c__OP5":0.0,"k__Bacteria;p__Caldiserica;c__TTA-B1":0.0,"k__Bacteria;p__Chlorobi;c__Ignavibacteria":0.0,"k__Bacteria;p__Chlorobi;c__SJA-28":0.0,"k__Bacteria;p__Chloroflexi;c__":0.0,"k__Bacteria;p__Chloroflexi;c__Anaerolineae":0.0,"k__Bacteria;p__Chloroflexi;c__Dehalococcoidetes":0.0,"k__Bacteria;p__Chloroflexi;c__Ellin6529":0.0,"k__Bacteria;p__Chloroflexi;c__TK17":0.0,"k__Bacteria;p__Chloroflexi;c__Thermomicrobia":0.0,"k__Bacteria;p__Cyanobacteria;c__Chloroplast":0.0,"k__Bacteria;p__EM3;c__":0.0,"k__Bacteria;p__Fibrobacteres;c__Fibrobacteria":0.0,"k__Bacteria;p__Fibrobacteres;c__TG3":0.0,"k__Bacteria;p__Firmicutes;c__Bacilli":56.0,"k__Bacteria;p__Firmicutes;c__Clostridia":4643.0,"k__Bacteria;p__Firmicutes;c__Erysipelotrichi":195.0,"k__Bacteria;p__Firmicutes;c__OPB54":34.0,"k__Bacteria;p__NKB19;c__noFP_H4":0.0,"k__Bacteria;p__OD1;c__":0.0,"k__Bacteria;p__OD1;c__ABY1":0.0,"k__Bacteria;p__OP1;c__OPB14":0.0,"k__Bacteria;p__OP8;c__OP8_1":0.0,"k__Bacteria;p__OP9;c__JS1":0.0,"k__Bacteria;p__OP9;c__OPB46":9.0,"k__Bacteria;p__Proteobacteria;c__Alphaproteobacteria":0.0,"k__Bacteria;p__Proteobacteria;c__Betaproteobacteria":0.0,"k__Bacteria;p__Proteobacteria;c__Deltaproteobacteria":0.0,"k__Bacteria;p__Proteobacteria;c__Epsilonproteobacteria":0.0,"k__Bacteria;p__Proteobacteria;c__Gammaproteobacteria":0.0,"k__Bacteria;p__SAR406;c__AB16":0.0,"k__Bacteria;p__SR1;c__":19.0,"k__Bacteria;p__Spirochaetes;c__MVP-15":0.0,"k__Bacteria;p__Spirochaetes;c__Spirochaetes":60.0,"k__Bacteria;p__Spirochaetes;c__[Leptospirae]":0.0,"k__Bacteria;p__Synergistetes;c__Synergistia":0.0,"k__Bacteria;p__TA06;c__":0.0,"k__Bacteria;p__TM7;c__TM7-1":0.0,"k__Bacteria;p__TM7;c__TM7-3":0.0,"k__Bacteria;p__Tenericutes;c__Mollicutes":86.0,"k__Bacteria;p__Tenericutes;c__RF3":52.0,"k__Bacteria;p__Thermotogae;c__Thermotogae":0.0,"k__Bacteria;p__Verrucomicrobia;c__Verruco-5":0.0,"k__Bacteria;p__Verrucomicrobia;c__[Pedosphaerae]":0.0,"k__Bacteria;p__WPS-2;c__":0.0,"k__Bacteria;p__WS6;c__SC72":0.0,"k__Bacteria;p__WWE1;c__[Cloacamonae]":59.0,"plant type":"Biogas","plant no.":"#05"},{"index":"06_U341F-U806R-NW3-6","k__Archaea;p__Crenarchaeota;c__MCG":13.0,"k__Archaea;p__Euryarchaeota;c__Methanobacteria":8.0,"k__Archaea;p__Euryarchaeota;c__Methanomicrobia":1081.0,"k__Archaea;p__Euryarchaeota;c__Thermoplasmata":0.0,"k__Archaea;p__[Parvarchaeota];c__[Parvarchaea]":0.0,"k__Bacteria;__;__":145.0,"k__Bacteria;p__;c__":310.0,"k__Bacteria;p__Acidobacteria;c__BPC102":17.0,"k__Bacteria;p__Acidobacteria;c__Solibacteres":0.0,"k__Bacteria;p__Acidobacteria;c__[Chloracidobacteria]":0.0,"k__Bacteria;p__Actinobacteria;c__":0.0,"k__Bacteria;p__Actinobacteria;c__Acidimicrobiia":0.0,"k__Bacteria;p__Actinobacteria;c__Actinobacteria":24.0,"k__Bacteria;p__Actinobacteria;c__Coriobacteriia":37.0,"k__Bacteria;p__Armatimonadetes;c__SJA-176":0.0,"k__Bacteria;p__Bacteroidetes;__":10.0,"k__Bacteria;p__Bacteroidetes;c__Bacteroidia":2421.0,"k__Bacteria;p__Bacteroidetes;c__Flavobacteriia":0.0,"k__Bacteria;p__Bacteroidetes;c__Sphingobacteriia":0.0,"k__Bacteria;p__Bacteroidetes;c__[Saprospirae]":0.0,"k__Bacteria;p__Caldiserica;c__OP5":0.0,"k__Bacteria;p__Caldiserica;c__TTA-B1":0.0,"k__Bacteria;p__Chlorobi;c__Ignavibacteria":0.0,"k__Bacteria;p__Chlorobi;c__SJA-28":0.0,"k__Bacteria;p__Chloroflexi;c__":0.0,"k__Bacteria;p__Chloroflexi;c__Anaerolineae":0.0,"k__Bacteria;p__Chloroflexi;c__Dehalococcoidetes":8.0,"k__Bacteria;p__Chloroflexi;c__Ellin6529":0.0,"k__Bacteria;p__Chloroflexi;c__TK17":0.0,"k__Bacteria;p__Chloroflexi;c__Thermomicrobia":0.0,"k__Bacteria;p__Cyanobacteria;c__Chloroplast":0.0,"k__Bacteria;p__EM3;c__":0.0,"k__Bacteria;p__Fibrobacteres;c__Fibrobacteria":7.0,"k__Bacteria;p__Fibrobacteres;c__TG3":50.0,"k__Bacteria;p__Firmicutes;c__Bacilli":40.0,"k__Bacteria;p__Firmicutes;c__Clostridia":5859.0,"k__Bacteria;p__Firmicutes;c__Erysipelotrichi":29.0,"k__Bacteria;p__Firmicutes;c__OPB54":3.0,"k__Bacteria;p__NKB19;c__noFP_H4":0.0,"k__Bacteria;p__OD1;c__":0.0,"k__Bacteria;p__OD1;c__ABY1":12.0,"k__Bacteria;p__OP1;c__OPB14":0.0,"k__Bacteria;p__OP8;c__OP8_1":0.0,"k__Bacteria;p__OP9;c__JS1":0.0,"k__Bacteria;p__OP9;c__OPB46":21.0,"k__Bacteria;p__Proteobacteria;c__Alphaproteobacteria":0.0,"k__Bacteria;p__Proteobacteria;c__Betaproteobacteria":0.0,"k__Bacteria;p__Proteobacteria;c__Deltaproteobacteria":0.0,"k__Bacteria;p__Proteobacteria;c__Epsilonproteobacteria":15.0,"k__Bacteria;p__Proteobacteria;c__Gammaproteobacteria":0.0,"k__Bacteria;p__SAR406;c__AB16":0.0,"k__Bacteria;p__SR1;c__":277.0,"k__Bacteria;p__Spirochaetes;c__MVP-15":0.0,"k__Bacteria;p__Spirochaetes;c__Spirochaetes":63.0,"k__Bacteria;p__Spirochaetes;c__[Leptospirae]":0.0,"k__Bacteria;p__Synergistetes;c__Synergistia":104.0,"k__Bacteria;p__TA06;c__":0.0,"k__Bacteria;p__TM7;c__TM7-1":0.0,"k__Bacteria;p__TM7;c__TM7-3":8.0,"k__Bacteria;p__Tenericutes;c__Mollicutes":145.0,"k__Bacteria;p__Tenericutes;c__RF3":212.0,"k__Bacteria;p__Thermotogae;c__Thermotogae":0.0,"k__Bacteria;p__Verrucomicrobia;c__Verruco-5":14.0,"k__Bacteria;p__Verrucomicrobia;c__[Pedosphaerae]":13.0,"k__Bacteria;p__WPS-2;c__":11.0,"k__Bacteria;p__WS6;c__SC72":6.0,"k__Bacteria;p__WWE1;c__[Cloacamonae]":861.0,"plant type":"Biogas","plant no.":"#06"},{"index":"07_U341F-U806R-NW3-8","k__Archaea;p__Crenarchaeota;c__MCG":0.0,"k__Archaea;p__Euryarchaeota;c__Methanobacteria":0.0,"k__Archaea;p__Euryarchaeota;c__Methanomicrobia":100.0,"k__Archaea;p__Euryarchaeota;c__Thermoplasmata":0.0,"k__Archaea;p__[Parvarchaeota];c__[Parvarchaea]":0.0,"k__Bacteria;__;__":19.0,"k__Bacteria;p__;c__":91.0,"k__Bacteria;p__Acidobacteria;c__BPC102":0.0,"k__Bacteria;p__Acidobacteria;c__Solibacteres":0.0,"k__Bacteria;p__Acidobacteria;c__[Chloracidobacteria]":0.0,"k__Bacteria;p__Actinobacteria;c__":0.0,"k__Bacteria;p__Actinobacteria;c__Acidimicrobiia":0.0,"k__Bacteria;p__Actinobacteria;c__Actinobacteria":0.0,"k__Bacteria;p__Actinobacteria;c__Coriobacteriia":0.0,"k__Bacteria;p__Armatimonadetes;c__SJA-176":0.0,"k__Bacteria;p__Bacteroidetes;__":851.0,"k__Bacteria;p__Bacteroidetes;c__Bacteroidia":1774.0,"k__Bacteria;p__Bacteroidetes;c__Flavobacteriia":0.0,"k__Bacteria;p__Bacteroidetes;c__Sphingobacteriia":0.0,"k__Bacteria;p__Bacteroidetes;c__[Saprospirae]":0.0,"k__Bacteria;p__Caldiserica;c__OP5":0.0,"k__Bacteria;p__Caldiserica;c__TTA-B1":0.0,"k__Bacteria;p__Chlorobi;c__Ignavibacteria":0.0,"k__Bacteria;p__Chlorobi;c__SJA-28":0.0,"k__Bacteria;p__Chloroflexi;c__":0.0,"k__Bacteria;p__Chloroflexi;c__Anaerolineae":0.0,"k__Bacteria;p__Chloroflexi;c__Dehalococcoidetes":0.0,"k__Bacteria;p__Chloroflexi;c__Ellin6529":0.0,"k__Bacteria;p__Chloroflexi;c__TK17":0.0,"k__Bacteria;p__Chloroflexi;c__Thermomicrobia":0.0,"k__Bacteria;p__Cyanobacteria;c__Chloroplast":0.0,"k__Bacteria;p__EM3;c__":0.0,"k__Bacteria;p__Fibrobacteres;c__Fibrobacteria":0.0,"k__Bacteria;p__Fibrobacteres;c__TG3":0.0,"k__Bacteria;p__Firmicutes;c__Bacilli":34.0,"k__Bacteria;p__Firmicutes;c__Clostridia":9028.0,"k__Bacteria;p__Firmicutes;c__Erysipelotrichi":0.0,"k__Bacteria;p__Firmicutes;c__OPB54":77.0,"k__Bacteria;p__NKB19;c__noFP_H4":0.0,"k__Bacteria;p__OD1;c__":0.0,"k__Bacteria;p__OD1;c__ABY1":0.0,"k__Bacteria;p__OP1;c__OPB14":0.0,"k__Bacteria;p__OP8;c__OP8_1":0.0,"k__Bacteria;p__OP9;c__JS1":0.0,"k__Bacteria;p__OP9;c__OPB46":16.0,"k__Bacteria;p__Proteobacteria;c__Alphaproteobacteria":0.0,"k__Bacteria;p__Proteobacteria;c__Betaproteobacteria":0.0,"k__Bacteria;p__Proteobacteria;c__Deltaproteobacteria":0.0,"k__Bacteria;p__Proteobacteria;c__Epsilonproteobacteria":0.0,"k__Bacteria;p__Proteobacteria;c__Gammaproteobacteria":0.0,"k__Bacteria;p__SAR406;c__AB16":0.0,"k__Bacteria;p__SR1;c__":0.0,"k__Bacteria;p__Spirochaetes;c__MVP-15":0.0,"k__Bacteria;p__Spirochaetes;c__Spirochaetes":0.0,"k__Bacteria;p__Spirochaetes;c__[Leptospirae]":0.0,"k__Bacteria;p__Synergistetes;c__Synergistia":94.0,"k__Bacteria;p__TA06;c__":0.0,"k__Bacteria;p__TM7;c__TM7-1":0.0,"k__Bacteria;p__TM7;c__TM7-3":0.0,"k__Bacteria;p__Tenericutes;c__Mollicutes":0.0,"k__Bacteria;p__Tenericutes;c__RF3":70.0,"k__Bacteria;p__Thermotogae;c__Thermotogae":320.0,"k__Bacteria;p__Verrucomicrobia;c__Verruco-5":0.0,"k__Bacteria;p__Verrucomicrobia;c__[Pedosphaerae]":0.0,"k__Bacteria;p__WPS-2;c__":0.0,"k__Bacteria;p__WS6;c__SC72":0.0,"k__Bacteria;p__WWE1;c__[Cloacamonae]":0.0,"plant type":"Biogas","plant no.":"#07"},{"index":"08_U341F-U806R-NW3-9","k__Archaea;p__Crenarchaeota;c__MCG":0.0,"k__Archaea;p__Euryarchaeota;c__Methanobacteria":0.0,"k__Archaea;p__Euryarchaeota;c__Methanomicrobia":0.0,"k__Archaea;p__Euryarchaeota;c__Thermoplasmata":0.0,"k__Archaea;p__[Parvarchaeota];c__[Parvarchaea]":0.0,"k__Bacteria;__;__":0.0,"k__Bacteria;p__;c__":76.0,"k__Bacteria;p__Acidobacteria;c__BPC102":0.0,"k__Bacteria;p__Acidobacteria;c__Solibacteres":0.0,"k__Bacteria;p__Acidobacteria;c__[Chloracidobacteria]":0.0,"k__Bacteria;p__Actinobacteria;c__":0.0,"k__Bacteria;p__Actinobacteria;c__Acidimicrobiia":0.0,"k__Bacteria;p__Actinobacteria;c__Actinobacteria":0.0,"k__Bacteria;p__Actinobacteria;c__Coriobacteriia":0.0,"k__Bacteria;p__Armatimonadetes;c__SJA-176":0.0,"k__Bacteria;p__Bacteroidetes;__":298.0,"k__Bacteria;p__Bacteroidetes;c__Bacteroidia":105.0,"k__Bacteria;p__Bacteroidetes;c__Flavobacteriia":0.0,"k__Bacteria;p__Bacteroidetes;c__Sphingobacteriia":0.0,"k__Bacteria;p__Bacteroidetes;c__[Saprospirae]":0.0,"k__Bacteria;p__Caldiserica;c__OP5":0.0,"k__Bacteria;p__Caldiserica;c__TTA-B1":0.0,"k__Bacteria;p__Chlorobi;c__Ignavibacteria":0.0,"k__Bacteria;p__Chlorobi;c__SJA-28":0.0,"k__Bacteria;p__Chloroflexi;c__":0.0,"k__Bacteria;p__Chloroflexi;c__Anaerolineae":0.0,"k__Bacteria;p__Chloroflexi;c__Dehalococcoidetes":0.0,"k__Bacteria;p__Chloroflexi;c__Ellin6529":0.0,"k__Bacteria;p__Chloroflexi;c__TK17":0.0,"k__Bacteria;p__Chloroflexi;c__Thermomicrobia":0.0,"k__Bacteria;p__Cyanobacteria;c__Chloroplast":0.0,"k__Bacteria;p__EM3;c__":0.0,"k__Bacteria;p__Fibrobacteres;c__Fibrobacteria":0.0,"k__Bacteria;p__Fibrobacteres;c__TG3":0.0,"k__Bacteria;p__Firmicutes;c__Bacilli":0.0,"k__Bacteria;p__Firmicutes;c__Clostridia":2521.0,"k__Bacteria;p__Firmicutes;c__Erysipelotrichi":0.0,"k__Bacteria;p__Firmicutes;c__OPB54":21.0,"k__Bacteria;p__NKB19;c__noFP_H4":0.0,"k__Bacteria;p__OD1;c__":0.0,"k__Bacteria;p__OD1;c__ABY1":0.0,"k__Bacteria;p__OP1;c__OPB14":0.0,"k__Bacteria;p__OP8;c__OP8_1":0.0,"k__Bacteria;p__OP9;c__JS1":0.0,"k__Bacteria;p__OP9;c__OPB46":0.0,"k__Bacteria;p__Proteobacteria;c__Alphaproteobacteria":0.0,"k__Bacteria;p__Proteobacteria;c__Betaproteobacteria":0.0,"k__Bacteria;p__Proteobacteria;c__Deltaproteobacteria":0.0,"k__Bacteria;p__Proteobacteria;c__Epsilonproteobacteria":0.0,"k__Bacteria;p__Proteobacteria;c__Gammaproteobacteria":0.0,"k__Bacteria;p__SAR406;c__AB16":0.0,"k__Bacteria;p__SR1;c__":0.0,"k__Bacteria;p__Spirochaetes;c__MVP-15":0.0,"k__Bacteria;p__Spirochaetes;c__Spirochaetes":0.0,"k__Bacteria;p__Spirochaetes;c__[Leptospirae]":0.0,"k__Bacteria;p__Synergistetes;c__Synergistia":47.0,"k__Bacteria;p__TA06;c__":0.0,"k__Bacteria;p__TM7;c__TM7-1":0.0,"k__Bacteria;p__TM7;c__TM7-3":0.0,"k__Bacteria;p__Tenericutes;c__Mollicutes":0.0,"k__Bacteria;p__Tenericutes;c__RF3":66.0,"k__Bacteria;p__Thermotogae;c__Thermotogae":31.0,"k__Bacteria;p__Verrucomicrobia;c__Verruco-5":0.0,"k__Bacteria;p__Verrucomicrobia;c__[Pedosphaerae]":0.0,"k__Bacteria;p__WPS-2;c__":0.0,"k__Bacteria;p__WS6;c__SC72":0.0,"k__Bacteria;p__WWE1;c__[Cloacamonae]":0.0,"plant type":"Biogas","plant no.":"#08"},{"index":"09_U341F-U806R-NW3-10","k__Archaea;p__Crenarchaeota;c__MCG":8.0,"k__Archaea;p__Euryarchaeota;c__Methanobacteria":51.0,"k__Archaea;p__Euryarchaeota;c__Methanomicrobia":718.0,"k__Archaea;p__Euryarchaeota;c__Thermoplasmata":0.0,"k__Archaea;p__[Parvarchaeota];c__[Parvarchaea]":0.0,"k__Bacteria;__;__":68.0,"k__Bacteria;p__;c__":208.0,"k__Bacteria;p__Acidobacteria;c__BPC102":54.0,"k__Bacteria;p__Acidobacteria;c__Solibacteres":0.0,"k__Bacteria;p__Acidobacteria;c__[Chloracidobacteria]":0.0,"k__Bacteria;p__Actinobacteria;c__":0.0,"k__Bacteria;p__Actinobacteria;c__Acidimicrobiia":0.0,"k__Bacteria;p__Actinobacteria;c__Actinobacteria":30.0,"k__Bacteria;p__Actinobacteria;c__Coriobacteriia":48.0,"k__Bacteria;p__Armatimonadetes;c__SJA-176":0.0,"k__Bacteria;p__Bacteroidetes;__":0.0,"k__Bacteria;p__Bacteroidetes;c__Bacteroidia":4115.0,"k__Bacteria;p__Bacteroidetes;c__Flavobacteriia":0.0,"k__Bacteria;p__Bacteroidetes;c__Sphingobacteriia":0.0,"k__Bacteria;p__Bacteroidetes;c__[Saprospirae]":0.0,"k__Bacteria;p__Caldiserica;c__OP5":0.0,"k__Bacteria;p__Caldiserica;c__TTA-B1":0.0,"k__Bacteria;p__Chlorobi;c__Ignavibacteria":0.0,"k__Bacteria;p__Chlorobi;c__SJA-28":0.0,"k__Bacteria;p__Chloroflexi;c__":0.0,"k__Bacteria;p__Chloroflexi;c__Anaerolineae":0.0,"k__Bacteria;p__Chloroflexi;c__Dehalococcoidetes":0.0,"k__Bacteria;p__Chloroflexi;c__Ellin6529":0.0,"k__Bacteria;p__Chloroflexi;c__TK17":0.0,"k__Bacteria;p__Chloroflexi;c__Thermomicrobia":0.0,"k__Bacteria;p__Cyanobacteria;c__Chloroplast":2.0,"k__Bacteria;p__EM3;c__":0.0,"k__Bacteria;p__Fibrobacteres;c__Fibrobacteria":5.0,"k__Bacteria;p__Fibrobacteres;c__TG3":77.0,"k__Bacteria;p__Firmicutes;c__Bacilli":117.0,"k__Bacteria;p__Firmicutes;c__Clostridia":4558.0,"k__Bacteria;p__Firmicutes;c__Erysipelotrichi":80.0,"k__Bacteria;p__Firmicutes;c__OPB54":34.0,"k__Bacteria;p__NKB19;c__noFP_H4":5.0,"k__Bacteria;p__OD1;c__":0.0,"k__Bacteria;p__OD1;c__ABY1":0.0,"k__Bacteria;p__OP1;c__OPB14":0.0,"k__Bacteria;p__OP8;c__OP8_1":0.0,"k__Bacteria;p__OP9;c__JS1":0.0,"k__Bacteria;p__OP9;c__OPB46":11.0,"k__Bacteria;p__Proteobacteria;c__Alphaproteobacteria":3.0,"k__Bacteria;p__Proteobacteria;c__Betaproteobacteria":0.0,"k__Bacteria;p__Proteobacteria;c__Deltaproteobacteria":9.0,"k__Bacteria;p__Proteobacteria;c__Epsilonproteobacteria":0.0,"k__Bacteria;p__Proteobacteria;c__Gammaproteobacteria":0.0,"k__Bacteria;p__SAR406;c__AB16":0.0,"k__Bacteria;p__SR1;c__":168.0,"k__Bacteria;p__Spirochaetes;c__MVP-15":0.0,"k__Bacteria;p__Spirochaetes;c__Spirochaetes":188.0,"k__Bacteria;p__Spirochaetes;c__[Leptospirae]":9.0,"k__Bacteria;p__Synergistetes;c__Synergistia":158.0,"k__Bacteria;p__TA06;c__":0.0,"k__Bacteria;p__TM7;c__TM7-1":0.0,"k__Bacteria;p__TM7;c__TM7-3":67.0,"k__Bacteria;p__Tenericutes;c__Mollicutes":102.0,"k__Bacteria;p__Tenericutes;c__RF3":182.0,"k__Bacteria;p__Thermotogae;c__Thermotogae":0.0,"k__Bacteria;p__Verrucomicrobia;c__Verruco-5":0.0,"k__Bacteria;p__Verrucomicrobia;c__[Pedosphaerae]":6.0,"k__Bacteria;p__WPS-2;c__":0.0,"k__Bacteria;p__WS6;c__SC72":3.0,"k__Bacteria;p__WWE1;c__[Cloacamonae]":468.0,"plant type":"Biogas","plant no.":"#09"},{"index":"10_U341F-U806R-NW3-11","k__Archaea;p__Crenarchaeota;c__MCG":0.0,"k__Archaea;p__Euryarchaeota;c__Methanobacteria":81.0,"k__Archaea;p__Euryarchaeota;c__Methanomicrobia":0.0,"k__Archaea;p__Euryarchaeota;c__Thermoplasmata":0.0,"k__Archaea;p__[Parvarchaeota];c__[Parvarchaea]":0.0,"k__Bacteria;__;__":20.0,"k__Bacteria;p__;c__":442.0,"k__Bacteria;p__Acidobacteria;c__BPC102":0.0,"k__Bacteria;p__Acidobacteria;c__Solibacteres":0.0,"k__Bacteria;p__Acidobacteria;c__[Chloracidobacteria]":0.0,"k__Bacteria;p__Actinobacteria;c__":0.0,"k__Bacteria;p__Actinobacteria;c__Acidimicrobiia":0.0,"k__Bacteria;p__Actinobacteria;c__Actinobacteria":0.0,"k__Bacteria;p__Actinobacteria;c__Coriobacteriia":0.0,"k__Bacteria;p__Armatimonadetes;c__SJA-176":0.0,"k__Bacteria;p__Bacteroidetes;__":885.0,"k__Bacteria;p__Bacteroidetes;c__Bacteroidia":424.0,"k__Bacteria;p__Bacteroidetes;c__Flavobacteriia":0.0,"k__Bacteria;p__Bacteroidetes;c__Sphingobacteriia":0.0,"k__Bacteria;p__Bacteroidetes;c__[Saprospirae]":0.0,"k__Bacteria;p__Caldiserica;c__OP5":0.0,"k__Bacteria;p__Caldiserica;c__TTA-B1":0.0,"k__Bacteria;p__Chlorobi;c__Ignavibacteria":0.0,"k__Bacteria;p__Chlorobi;c__SJA-28":0.0,"k__Bacteria;p__Chloroflexi;c__":0.0,"k__Bacteria;p__Chloroflexi;c__Anaerolineae":0.0,"k__Bacteria;p__Chloroflexi;c__Dehalococcoidetes":0.0,"k__Bacteria;p__Chloroflexi;c__Ellin6529":0.0,"k__Bacteria;p__Chloroflexi;c__TK17":0.0,"k__Bacteria;p__Chloroflexi;c__Thermomicrobia":0.0,"k__Bacteria;p__Cyanobacteria;c__Chloroplast":0.0,"k__Bacteria;p__EM3;c__":0.0,"k__Bacteria;p__Fibrobacteres;c__Fibrobacteria":0.0,"k__Bacteria;p__Fibrobacteres;c__TG3":0.0,"k__Bacteria;p__Firmicutes;c__Bacilli":47.0,"k__Bacteria;p__Firmicutes;c__Clostridia":7938.0,"k__Bacteria;p__Firmicutes;c__Erysipelotrichi":0.0,"k__Bacteria;p__Firmicutes;c__OPB54":133.0,"k__Bacteria;p__NKB19;c__noFP_H4":0.0,"k__Bacteria;p__OD1;c__":0.0,"k__Bacteria;p__OD1;c__ABY1":0.0,"k__Bacteria;p__OP1;c__OPB14":0.0,"k__Bacteria;p__OP8;c__OP8_1":0.0,"k__Bacteria;p__OP9;c__JS1":0.0,"k__Bacteria;p__OP9;c__OPB46":15.0,"k__Bacteria;p__Proteobacteria;c__Alphaproteobacteria":0.0,"k__Bacteria;p__Proteobacteria;c__Betaproteobacteria":0.0,"k__Bacteria;p__Proteobacteria;c__Deltaproteobacteria":0.0,"k__Bacteria;p__Proteobacteria;c__Epsilonproteobacteria":0.0,"k__Bacteria;p__Proteobacteria;c__Gammaproteobacteria":0.0,"k__Bacteria;p__SAR406;c__AB16":0.0,"k__Bacteria;p__SR1;c__":0.0,"k__Bacteria;p__Spirochaetes;c__MVP-15":0.0,"k__Bacteria;p__Spirochaetes;c__Spirochaetes":0.0,"k__Bacteria;p__Spirochaetes;c__[Leptospirae]":0.0,"k__Bacteria;p__Synergistetes;c__Synergistia":55.0,"k__Bacteria;p__TA06;c__":0.0,"k__Bacteria;p__TM7;c__TM7-1":0.0,"k__Bacteria;p__TM7;c__TM7-3":0.0,"k__Bacteria;p__Tenericutes;c__Mollicutes":0.0,"k__Bacteria;p__Tenericutes;c__RF3":175.0,"k__Bacteria;p__Thermotogae;c__Thermotogae":1476.0,"k__Bacteria;p__Verrucomicrobia;c__Verruco-5":0.0,"k__Bacteria;p__Verrucomicrobia;c__[Pedosphaerae]":0.0,"k__Bacteria;p__WPS-2;c__":0.0,"k__Bacteria;p__WS6;c__SC72":0.0,"k__Bacteria;p__WWE1;c__[Cloacamonae]":0.0,"plant type":"Biogas","plant no.":"#10"},{"index":"11_U341F-U806R-NW3-12","k__Archaea;p__Crenarchaeota;c__MCG":0.0,"k__Archaea;p__Euryarchaeota;c__Methanobacteria":0.0,"k__Archaea;p__Euryarchaeota;c__Methanomicrobia":29.0,"k__Archaea;p__Euryarchaeota;c__Thermoplasmata":6.0,"k__Archaea;p__[Parvarchaeota];c__[Parvarchaea]":0.0,"k__Bacteria;__;__":126.0,"k__Bacteria;p__;c__":266.0,"k__Bacteria;p__Acidobacteria;c__BPC102":19.0,"k__Bacteria;p__Acidobacteria;c__Solibacteres":0.0,"k__Bacteria;p__Acidobacteria;c__[Chloracidobacteria]":0.0,"k__Bacteria;p__Actinobacteria;c__":0.0,"k__Bacteria;p__Actinobacteria;c__Acidimicrobiia":0.0,"k__Bacteria;p__Actinobacteria;c__Actinobacteria":0.0,"k__Bacteria;p__Actinobacteria;c__Coriobacteriia":0.0,"k__Bacteria;p__Armatimonadetes;c__SJA-176":0.0,"k__Bacteria;p__Bacteroidetes;__":226.0,"k__Bacteria;p__Bacteroidetes;c__Bacteroidia":1192.0,"k__Bacteria;p__Bacteroidetes;c__Flavobacteriia":0.0,"k__Bacteria;p__Bacteroidetes;c__Sphingobacteriia":0.0,"k__Bacteria;p__Bacteroidetes;c__[Saprospirae]":0.0,"k__Bacteria;p__Caldiserica;c__OP5":0.0,"k__Bacteria;p__Caldiserica;c__TTA-B1":0.0,"k__Bacteria;p__Chlorobi;c__Ignavibacteria":0.0,"k__Bacteria;p__Chlorobi;c__SJA-28":0.0,"k__Bacteria;p__Chloroflexi;c__":0.0,"k__Bacteria;p__Chloroflexi;c__Anaerolineae":0.0,"k__Bacteria;p__Chloroflexi;c__Dehalococcoidetes":0.0,"k__Bacteria;p__Chloroflexi;c__Ellin6529":0.0,"k__Bacteria;p__Chloroflexi;c__TK17":0.0,"k__Bacteria;p__Chloroflexi;c__Thermomicrobia":0.0,"k__Bacteria;p__Cyanobacteria;c__Chloroplast":0.0,"k__Bacteria;p__EM3;c__":0.0,"k__Bacteria;p__Fibrobacteres;c__Fibrobacteria":7.0,"k__Bacteria;p__Fibrobacteres;c__TG3":22.0,"k__Bacteria;p__Firmicutes;c__Bacilli":64.0,"k__Bacteria;p__Firmicutes;c__Clostridia":8606.0,"k__Bacteria;p__Firmicutes;c__Erysipelotrichi":51.0,"k__Bacteria;p__Firmicutes;c__OPB54":107.0,"k__Bacteria;p__NKB19;c__noFP_H4":0.0,"k__Bacteria;p__OD1;c__":32.0,"k__Bacteria;p__OD1;c__ABY1":0.0,"k__Bacteria;p__OP1;c__OPB14":0.0,"k__Bacteria;p__OP8;c__OP8_1":0.0,"k__Bacteria;p__OP9;c__JS1":0.0,"k__Bacteria;p__OP9;c__OPB46":57.0,"k__Bacteria;p__Proteobacteria;c__Alphaproteobacteria":0.0,"k__Bacteria;p__Proteobacteria;c__Betaproteobacteria":0.0,"k__Bacteria;p__Proteobacteria;c__Deltaproteobacteria":0.0,"k__Bacteria;p__Proteobacteria;c__Epsilonproteobacteria":0.0,"k__Bacteria;p__Proteobacteria;c__Gammaproteobacteria":0.0,"k__Bacteria;p__SAR406;c__AB16":0.0,"k__Bacteria;p__SR1;c__":16.0,"k__Bacteria;p__Spirochaetes;c__MVP-15":0.0,"k__Bacteria;p__Spirochaetes;c__Spirochaetes":26.0,"k__Bacteria;p__Spirochaetes;c__[Leptospirae]":0.0,"k__Bacteria;p__Synergistetes;c__Synergistia":284.0,"k__Bacteria;p__TA06;c__":0.0,"k__Bacteria;p__TM7;c__TM7-1":0.0,"k__Bacteria;p__TM7;c__TM7-3":0.0,"k__Bacteria;p__Tenericutes;c__Mollicutes":44.0,"k__Bacteria;p__Tenericutes;c__RF3":68.0,"k__Bacteria;p__Thermotogae;c__Thermotogae":223.0,"k__Bacteria;p__Verrucomicrobia;c__Verruco-5":0.0,"k__Bacteria;p__Verrucomicrobia;c__[Pedosphaerae]":0.0,"k__Bacteria;p__WPS-2;c__":0.0,"k__Bacteria;p__WS6;c__SC72":0.0,"k__Bacteria;p__WWE1;c__[Cloacamonae]":1015.0,"plant type":"Biogas","plant no.":"#11"},{"index":"12_U341F-U806R-NW3-14","k__Archaea;p__Crenarchaeota;c__MCG":0.0,"k__Archaea;p__Euryarchaeota;c__Methanobacteria":15.0,"k__Archaea;p__Euryarchaeota;c__Methanomicrobia":25.0,"k__Archaea;p__Euryarchaeota;c__Thermoplasmata":0.0,"k__Archaea;p__[Parvarchaeota];c__[Parvarchaea]":0.0,"k__Bacteria;__;__":21.0,"k__Bacteria;p__;c__":247.0,"k__Bacteria;p__Acidobacteria;c__BPC102":0.0,"k__Bacteria;p__Acidobacteria;c__Solibacteres":0.0,"k__Bacteria;p__Acidobacteria;c__[Chloracidobacteria]":0.0,"k__Bacteria;p__Actinobacteria;c__":0.0,"k__Bacteria;p__Actinobacteria;c__Acidimicrobiia":0.0,"k__Bacteria;p__Actinobacteria;c__Actinobacteria":0.0,"k__Bacteria;p__Actinobacteria;c__Coriobacteriia":0.0,"k__Bacteria;p__Armatimonadetes;c__SJA-176":0.0,"k__Bacteria;p__Bacteroidetes;__":307.0,"k__Bacteria;p__Bacteroidetes;c__Bacteroidia":2358.0,"k__Bacteria;p__Bacteroidetes;c__Flavobacteriia":0.0,"k__Bacteria;p__Bacteroidetes;c__Sphingobacteriia":0.0,"k__Bacteria;p__Bacteroidetes;c__[Saprospirae]":0.0,"k__Bacteria;p__Caldiserica;c__OP5":0.0,"k__Bacteria;p__Caldiserica;c__TTA-B1":0.0,"k__Bacteria;p__Chlorobi;c__Ignavibacteria":0.0,"k__Bacteria;p__Chlorobi;c__SJA-28":0.0,"k__Bacteria;p__Chloroflexi;c__":0.0,"k__Bacteria;p__Chloroflexi;c__Anaerolineae":0.0,"k__Bacteria;p__Chloroflexi;c__Dehalococcoidetes":0.0,"k__Bacteria;p__Chloroflexi;c__Ellin6529":0.0,"k__Bacteria;p__Chloroflexi;c__TK17":0.0,"k__Bacteria;p__Chloroflexi;c__Thermomicrobia":0.0,"k__Bacteria;p__Cyanobacteria;c__Chloroplast":0.0,"k__Bacteria;p__EM3;c__":0.0,"k__Bacteria;p__Fibrobacteres;c__Fibrobacteria":0.0,"k__Bacteria;p__Fibrobacteres;c__TG3":0.0,"k__Bacteria;p__Firmicutes;c__Bacilli":87.0,"k__Bacteria;p__Firmicutes;c__Clostridia":7270.0,"k__Bacteria;p__Firmicutes;c__Erysipelotrichi":21.0,"k__Bacteria;p__Firmicutes;c__OPB54":94.0,"k__Bacteria;p__NKB19;c__noFP_H4":0.0,"k__Bacteria;p__OD1;c__":10.0,"k__Bacteria;p__OD1;c__ABY1":0.0,"k__Bacteria;p__OP1;c__OPB14":0.0,"k__Bacteria;p__OP8;c__OP8_1":0.0,"k__Bacteria;p__OP9;c__JS1":0.0,"k__Bacteria;p__OP9;c__OPB46":7.0,"k__Bacteria;p__Proteobacteria;c__Alphaproteobacteria":0.0,"k__Bacteria;p__Proteobacteria;c__Betaproteobacteria":0.0,"k__Bacteria;p__Proteobacteria;c__Deltaproteobacteria":0.0,"k__Bacteria;p__Proteobacteria;c__Epsilonproteobacteria":0.0,"k__Bacteria;p__Proteobacteria;c__Gammaproteobacteria":0.0,"k__Bacteria;p__SAR406;c__AB16":0.0,"k__Bacteria;p__SR1;c__":0.0,"k__Bacteria;p__Spirochaetes;c__MVP-15":0.0,"k__Bacteria;p__Spirochaetes;c__Spirochaetes":0.0,"k__Bacteria;p__Spirochaetes;c__[Leptospirae]":0.0,"k__Bacteria;p__Synergistetes;c__Synergistia":70.0,"k__Bacteria;p__TA06;c__":0.0,"k__Bacteria;p__TM7;c__TM7-1":0.0,"k__Bacteria;p__TM7;c__TM7-3":0.0,"k__Bacteria;p__Tenericutes;c__Mollicutes":12.0,"k__Bacteria;p__Tenericutes;c__RF3":371.0,"k__Bacteria;p__Thermotogae;c__Thermotogae":0.0,"k__Bacteria;p__Verrucomicrobia;c__Verruco-5":0.0,"k__Bacteria;p__Verrucomicrobia;c__[Pedosphaerae]":0.0,"k__Bacteria;p__WPS-2;c__":0.0,"k__Bacteria;p__WS6;c__SC72":0.0,"k__Bacteria;p__WWE1;c__[Cloacamonae]":0.0,"plant type":"Biogas","plant no.":"#12"},{"index":"13_U341F-U806R-NW3-15","k__Archaea;p__Crenarchaeota;c__MCG":0.0,"k__Archaea;p__Euryarchaeota;c__Methanobacteria":10.0,"k__Archaea;p__Euryarchaeota;c__Methanomicrobia":607.0,"k__Archaea;p__Euryarchaeota;c__Thermoplasmata":4.0,"k__Archaea;p__[Parvarchaeota];c__[Parvarchaea]":0.0,"k__Bacteria;__;__":34.0,"k__Bacteria;p__;c__":451.0,"k__Bacteria;p__Acidobacteria;c__BPC102":0.0,"k__Bacteria;p__Acidobacteria;c__Solibacteres":0.0,"k__Bacteria;p__Acidobacteria;c__[Chloracidobacteria]":0.0,"k__Bacteria;p__Actinobacteria;c__":0.0,"k__Bacteria;p__Actinobacteria;c__Acidimicrobiia":0.0,"k__Bacteria;p__Actinobacteria;c__Actinobacteria":35.0,"k__Bacteria;p__Actinobacteria;c__Coriobacteriia":0.0,"k__Bacteria;p__Armatimonadetes;c__SJA-176":0.0,"k__Bacteria;p__Bacteroidetes;__":822.0,"k__Bacteria;p__Bacteroidetes;c__Bacteroidia":851.0,"k__Bacteria;p__Bacteroidetes;c__Flavobacteriia":0.0,"k__Bacteria;p__Bacteroidetes;c__Sphingobacteriia":0.0,"k__Bacteria;p__Bacteroidetes;c__[Saprospirae]":0.0,"k__Bacteria;p__Caldiserica;c__OP5":0.0,"k__Bacteria;p__Caldiserica;c__TTA-B1":0.0,"k__Bacteria;p__Chlorobi;c__Ignavibacteria":0.0,"k__Bacteria;p__Chlorobi;c__SJA-28":0.0,"k__Bacteria;p__Chloroflexi;c__":0.0,"k__Bacteria;p__Chloroflexi;c__Anaerolineae":0.0,"k__Bacteria;p__Chloroflexi;c__Dehalococcoidetes":0.0,"k__Bacteria;p__Chloroflexi;c__Ellin6529":0.0,"k__Bacteria;p__Chloroflexi;c__TK17":0.0,"k__Bacteria;p__Chloroflexi;c__Thermomicrobia":0.0,"k__Bacteria;p__Cyanobacteria;c__Chloroplast":0.0,"k__Bacteria;p__EM3;c__":0.0,"k__Bacteria;p__Fibrobacteres;c__Fibrobacteria":0.0,"k__Bacteria;p__Fibrobacteres;c__TG3":0.0,"k__Bacteria;p__Firmicutes;c__Bacilli":507.0,"k__Bacteria;p__Firmicutes;c__Clostridia":8825.0,"k__Bacteria;p__Firmicutes;c__Erysipelotrichi":19.0,"k__Bacteria;p__Firmicutes;c__OPB54":104.0,"k__Bacteria;p__NKB19;c__noFP_H4":0.0,"k__Bacteria;p__OD1;c__":0.0,"k__Bacteria;p__OD1;c__ABY1":0.0,"k__Bacteria;p__OP1;c__OPB14":0.0,"k__Bacteria;p__OP8;c__OP8_1":0.0,"k__Bacteria;p__OP9;c__JS1":0.0,"k__Bacteria;p__OP9;c__OPB46":74.0,"k__Bacteria;p__Proteobacteria;c__Alphaproteobacteria":0.0,"k__Bacteria;p__Proteobacteria;c__Betaproteobacteria":0.0,"k__Bacteria;p__Proteobacteria;c__Deltaproteobacteria":0.0,"k__Bacteria;p__Proteobacteria;c__Epsilonproteobacteria":0.0,"k__Bacteria;p__Proteobacteria;c__Gammaproteobacteria":0.0,"k__Bacteria;p__SAR406;c__AB16":0.0,"k__Bacteria;p__SR1;c__":0.0,"k__Bacteria;p__Spirochaetes;c__MVP-15":0.0,"k__Bacteria;p__Spirochaetes;c__Spirochaetes":5.0,"k__Bacteria;p__Spirochaetes;c__[Leptospirae]":0.0,"k__Bacteria;p__Synergistetes;c__Synergistia":70.0,"k__Bacteria;p__TA06;c__":0.0,"k__Bacteria;p__TM7;c__TM7-1":0.0,"k__Bacteria;p__TM7;c__TM7-3":0.0,"k__Bacteria;p__Tenericutes;c__Mollicutes":90.0,"k__Bacteria;p__Tenericutes;c__RF3":211.0,"k__Bacteria;p__Thermotogae;c__Thermotogae":0.0,"k__Bacteria;p__Verrucomicrobia;c__Verruco-5":0.0,"k__Bacteria;p__Verrucomicrobia;c__[Pedosphaerae]":0.0,"k__Bacteria;p__WPS-2;c__":0.0,"k__Bacteria;p__WS6;c__SC72":2.0,"k__Bacteria;p__WWE1;c__[Cloacamonae]":8.0,"plant type":"Biogas","plant no.":"#13"},{"index":"14_U341F-U806R-NW3-7","k__Archaea;p__Crenarchaeota;c__MCG":0.0,"k__Archaea;p__Euryarchaeota;c__Methanobacteria":13.0,"k__Archaea;p__Euryarchaeota;c__Methanomicrobia":791.0,"k__Archaea;p__Euryarchaeota;c__Thermoplasmata":0.0,"k__Archaea;p__[Parvarchaeota];c__[Parvarchaea]":0.0,"k__Bacteria;__;__":224.0,"k__Bacteria;p__;c__":905.0,"k__Bacteria;p__Acidobacteria;c__BPC102":10.0,"k__Bacteria;p__Acidobacteria;c__Solibacteres":9.0,"k__Bacteria;p__Acidobacteria;c__[Chloracidobacteria]":0.0,"k__Bacteria;p__Actinobacteria;c__":16.0,"k__Bacteria;p__Actinobacteria;c__Acidimicrobiia":112.0,"k__Bacteria;p__Actinobacteria;c__Actinobacteria":223.0,"k__Bacteria;p__Actinobacteria;c__Coriobacteriia":0.0,"k__Bacteria;p__Armatimonadetes;c__SJA-176":8.0,"k__Bacteria;p__Bacteroidetes;__":8.0,"k__Bacteria;p__Bacteroidetes;c__Bacteroidia":2446.0,"k__Bacteria;p__Bacteroidetes;c__Flavobacteriia":0.0,"k__Bacteria;p__Bacteroidetes;c__Sphingobacteriia":0.0,"k__Bacteria;p__Bacteroidetes;c__[Saprospirae]":33.0,"k__Bacteria;p__Caldiserica;c__OP5":17.0,"k__Bacteria;p__Caldiserica;c__TTA-B1":14.0,"k__Bacteria;p__Chlorobi;c__Ignavibacteria":0.0,"k__Bacteria;p__Chlorobi;c__SJA-28":16.0,"k__Bacteria;p__Chloroflexi;c__":6.0,"k__Bacteria;p__Chloroflexi;c__Anaerolineae":432.0,"k__Bacteria;p__Chloroflexi;c__Dehalococcoidetes":0.0,"k__Bacteria;p__Chloroflexi;c__Ellin6529":3.0,"k__Bacteria;p__Chloroflexi;c__TK17":0.0,"k__Bacteria;p__Chloroflexi;c__Thermomicrobia":0.0,"k__Bacteria;p__Cyanobacteria;c__Chloroplast":0.0,"k__Bacteria;p__EM3;c__":793.0,"k__Bacteria;p__Fibrobacteres;c__Fibrobacteria":0.0,"k__Bacteria;p__Fibrobacteres;c__TG3":0.0,"k__Bacteria;p__Firmicutes;c__Bacilli":57.0,"k__Bacteria;p__Firmicutes;c__Clostridia":4018.0,"k__Bacteria;p__Firmicutes;c__Erysipelotrichi":0.0,"k__Bacteria;p__Firmicutes;c__OPB54":0.0,"k__Bacteria;p__NKB19;c__noFP_H4":0.0,"k__Bacteria;p__OD1;c__":313.0,"k__Bacteria;p__OD1;c__ABY1":0.0,"k__Bacteria;p__OP1;c__OPB14":20.0,"k__Bacteria;p__OP8;c__OP8_1":304.0,"k__Bacteria;p__OP9;c__JS1":5.0,"k__Bacteria;p__OP9;c__OPB46":80.0,"k__Bacteria;p__Proteobacteria;c__Alphaproteobacteria":23.0,"k__Bacteria;p__Proteobacteria;c__Betaproteobacteria":120.0,"k__Bacteria;p__Proteobacteria;c__Deltaproteobacteria":97.0,"k__Bacteria;p__Proteobacteria;c__Epsilonproteobacteria":14.0,"k__Bacteria;p__Proteobacteria;c__Gammaproteobacteria":103.0,"k__Bacteria;p__SAR406;c__AB16":8.0,"k__Bacteria;p__SR1;c__":0.0,"k__Bacteria;p__Spirochaetes;c__MVP-15":0.0,"k__Bacteria;p__Spirochaetes;c__Spirochaetes":470.0,"k__Bacteria;p__Spirochaetes;c__[Leptospirae]":31.0,"k__Bacteria;p__Synergistetes;c__Synergistia":168.0,"k__Bacteria;p__TA06;c__":5.0,"k__Bacteria;p__TM7;c__TM7-1":31.0,"k__Bacteria;p__TM7;c__TM7-3":110.0,"k__Bacteria;p__Tenericutes;c__Mollicutes":0.0,"k__Bacteria;p__Tenericutes;c__RF3":4.0,"k__Bacteria;p__Thermotogae;c__Thermotogae":225.0,"k__Bacteria;p__Verrucomicrobia;c__Verruco-5":0.0,"k__Bacteria;p__Verrucomicrobia;c__[Pedosphaerae]":0.0,"k__Bacteria;p__WPS-2;c__":4.0,"k__Bacteria;p__WS6;c__SC72":28.0,"k__Bacteria;p__WWE1;c__[Cloacamonae]":2349.0,"plant type":"SSD","plant no.":"#14"},{"index":"15_U341F-U806R-NW3-13","k__Archaea;p__Crenarchaeota;c__MCG":0.0,"k__Archaea;p__Euryarchaeota;c__Methanobacteria":14.0,"k__Archaea;p__Euryarchaeota;c__Methanomicrobia":294.0,"k__Archaea;p__Euryarchaeota;c__Thermoplasmata":0.0,"k__Archaea;p__[Parvarchaeota];c__[Parvarchaea]":5.0,"k__Bacteria;__;__":0.0,"k__Bacteria;p__;c__":16.0,"k__Bacteria;p__Acidobacteria;c__BPC102":0.0,"k__Bacteria;p__Acidobacteria;c__Solibacteres":0.0,"k__Bacteria;p__Acidobacteria;c__[Chloracidobacteria]":14.0,"k__Bacteria;p__Actinobacteria;c__":0.0,"k__Bacteria;p__Actinobacteria;c__Acidimicrobiia":110.0,"k__Bacteria;p__Actinobacteria;c__Actinobacteria":888.0,"k__Bacteria;p__Actinobacteria;c__Coriobacteriia":0.0,"k__Bacteria;p__Armatimonadetes;c__SJA-176":0.0,"k__Bacteria;p__Bacteroidetes;__":0.0,"k__Bacteria;p__Bacteroidetes;c__Bacteroidia":1496.0,"k__Bacteria;p__Bacteroidetes;c__Flavobacteriia":11.0,"k__Bacteria;p__Bacteroidetes;c__Sphingobacteriia":0.0,"k__Bacteria;p__Bacteroidetes;c__[Saprospirae]":20.0,"k__Bacteria;p__Caldiserica;c__OP5":0.0,"k__Bacteria;p__Caldiserica;c__TTA-B1":0.0,"k__Bacteria;p__Chlorobi;c__Ignavibacteria":33.0,"k__Bacteria;p__Chlorobi;c__SJA-28":0.0,"k__Bacteria;p__Chloroflexi;c__":0.0,"k__Bacteria;p__Chloroflexi;c__Anaerolineae":144.0,"k__Bacteria;p__Chloroflexi;c__Dehalococcoidetes":0.0,"k__Bacteria;p__Chloroflexi;c__Ellin6529":0.0,"k__Bacteria;p__Chloroflexi;c__TK17":4.0,"k__Bacteria;p__Chloroflexi;c__Thermomicrobia":28.0,"k__Bacteria;p__Cyanobacteria;c__Chloroplast":0.0,"k__Bacteria;p__EM3;c__":0.0,"k__Bacteria;p__Fibrobacteres;c__Fibrobacteria":0.0,"k__Bacteria;p__Fibrobacteres;c__TG3":0.0,"k__Bacteria;p__Firmicutes;c__Bacilli":14.0,"k__Bacteria;p__Firmicutes;c__Clostridia":1361.0,"k__Bacteria;p__Firmicutes;c__Erysipelotrichi":0.0,"k__Bacteria;p__Firmicutes;c__OPB54":0.0,"k__Bacteria;p__NKB19;c__noFP_H4":11.0,"k__Bacteria;p__OD1;c__":0.0,"k__Bacteria;p__OD1;c__ABY1":0.0,"k__Bacteria;p__OP1;c__OPB14":0.0,"k__Bacteria;p__OP8;c__OP8_1":0.0,"k__Bacteria;p__OP9;c__JS1":10.0,"k__Bacteria;p__OP9;c__OPB46":19.0,"k__Bacteria;p__Proteobacteria;c__Alphaproteobacteria":58.0,"k__Bacteria;p__Proteobacteria;c__Betaproteobacteria":5.0,"k__Bacteria;p__Proteobacteria;c__Deltaproteobacteria":8.0,"k__Bacteria;p__Proteobacteria;c__Epsilonproteobacteria":0.0,"k__Bacteria;p__Proteobacteria;c__Gammaproteobacteria":12.0,"k__Bacteria;p__SAR406;c__AB16":0.0,"k__Bacteria;p__SR1;c__":260.0,"k__Bacteria;p__Spirochaetes;c__MVP-15":0.0,"k__Bacteria;p__Spirochaetes;c__Spirochaetes":0.0,"k__Bacteria;p__Spirochaetes;c__[Leptospirae]":5.0,"k__Bacteria;p__Synergistetes;c__Synergistia":549.0,"k__Bacteria;p__TA06;c__":0.0,"k__Bacteria;p__TM7;c__TM7-1":44.0,"k__Bacteria;p__TM7;c__TM7-3":9.0,"k__Bacteria;p__Tenericutes;c__Mollicutes":4.0,"k__Bacteria;p__Tenericutes;c__RF3":0.0,"k__Bacteria;p__Thermotogae;c__Thermotogae":0.0,"k__Bacteria;p__Verrucomicrobia;c__Verruco-5":0.0,"k__Bacteria;p__Verrucomicrobia;c__[Pedosphaerae]":0.0,"k__Bacteria;p__WPS-2;c__":0.0,"k__Bacteria;p__WS6;c__SC72":0.0,"k__Bacteria;p__WWE1;c__[Cloacamonae]":28.0,"plant type":"SSD","plant no.":"#15"}]);
