# Supplementary material for: Arsenic metabolism in technical biogas plants: possible consequences for resident microbiota and downstream units
Source: AMB Express. 2019 Nov 28;9:190. doi: 10.1186/s13568-019-0902-6 (PMC6882981; doi:10.1186/s13568-019-0902-6)
Supplement: Supplementary file 2 — Additional file 2. Additional electronic material, which provides full dataset of Figure 1 (Qiime2 files). [file 13568_2019_902_MOESM2_ESM.qzv › 41ab44e8-4670-4568-81db-98b188333850/data/level-4.csv]

index	k__Archaea;p__Crenarchaeota;c__MCG;o__pGrfC26	k__Archaea;p__Euryarchaeota;c__Methanobacteria;o__Methanobacteriales	k__Archaea;p__Euryarchaeota;c__Methanomicrobia;o__Methanomicrobiales	k__Archaea;p__Euryarchaeota;c__Methanomicrobia;o__Methanosarcinales	k__Archaea;p__Euryarchaeota;c__Thermoplasmata;o__E2	k__Archaea;p__[Parvarchaeota];c__[Parvarchaea];o__WCHD3-30	k__Bacteria;__;__;__	k__Bacteria;p__;c__;o__	k__Bacteria;p__Acidobacteria;c__BPC102;o__MVS-40	k__Bacteria;p__Acidobacteria;c__Solibacteres;o__Solibacterales	k__Bacteria;p__Acidobacteria;c__[Chloracidobacteria];o__RB41	k__Bacteria;p__Actinobacteria;c__;o__	k__Bacteria;p__Actinobacteria;c__Acidimicrobiia;o__Acidimicrobiales	k__Bacteria;p__Actinobacteria;c__Actinobacteria;o__Actinomycetales	k__Bacteria;p__Actinobacteria;c__Actinobacteria;o__Bifidobacteriales	k__Bacteria;p__Actinobacteria;c__Actinobacteria;o__WCHB1-81	k__Bacteria;p__Actinobacteria;c__Coriobacteriia;o__Coriobacteriales	k__Bacteria;p__Armatimonadetes;c__SJA-176;o__GAB-B06	k__Bacteria;p__Bacteroidetes;__;__	k__Bacteria;p__Bacteroidetes;c__Bacteroidia;o__Bacteroidales	k__Bacteria;p__Bacteroidetes;c__Flavobacteriia;o__Flavobacteriales	k__Bacteria;p__Bacteroidetes;c__Sphingobacteriia;o__Sphingobacteriales	k__Bacteria;p__Bacteroidetes;c__[Saprospirae];o__[Saprospirales]	k__Bacteria;p__Caldiserica;c__OP5;o__WCHB1-02	k__Bacteria;p__Caldiserica;c__TTA-B1;o__	k__Bacteria;p__Chlorobi;c__Ignavibacteria;o__Ignavibacteriales	k__Bacteria;p__Chlorobi;c__SJA-28;o__	k__Bacteria;p__Chloroflexi;c__;o__	k__Bacteria;p__Chloroflexi;c__Anaerolineae;o__Anaerolineales	k__Bacteria;p__Chloroflexi;c__Anaerolineae;o__Caldilineales	k__Bacteria;p__Chloroflexi;c__Anaerolineae;o__OPB11	k__Bacteria;p__Chloroflexi;c__Anaerolineae;o__SBR1031	k__Bacteria;p__Chloroflexi;c__Anaerolineae;o__SHA-20	k__Bacteria;p__Chloroflexi;c__Dehalococcoidetes;o__Dehalococcoidales	k__Bacteria;p__Chloroflexi;c__Ellin6529;o__	k__Bacteria;p__Chloroflexi;c__TK17;o__mle1-48	k__Bacteria;p__Chloroflexi;c__Thermomicrobia;o__JG30-KF-CM45	k__Bacteria;p__Cyanobacteria;c__Chloroplast;o__Streptophyta	k__Bacteria;p__EM3;c__;o__	k__Bacteria;p__Fibrobacteres;c__Fibrobacteria;o__Fibrobacterales	k__Bacteria;p__Fibrobacteres;c__TG3;o__TG3-1	k__Bacteria;p__Firmicutes;c__Bacilli;__	k__Bacteria;p__Firmicutes;c__Bacilli;o__Bacillales	k__Bacteria;p__Firmicutes;c__Bacilli;o__Haloplasmatales	k__Bacteria;p__Firmicutes;c__Bacilli;o__Lactobacillales	k__Bacteria;p__Firmicutes;c__Bacilli;o__Turicibacterales	k__Bacteria;p__Firmicutes;c__Clostridia;__	k__Bacteria;p__Firmicutes;c__Clostridia;o__	k__Bacteria;p__Firmicutes;c__Clostridia;o__BSA2B-08
01_U341F-U806R-NW3-1	0.0	0.0	0.0	97.0	0.0	0.0	0.0	35.0	0.0	0.0	0.0	0.0	0.0	9.0	0.0	0.0	0.0	0.0	117.0	315.0	0.0	0.0	0.0	0.0	0.0	0.0	0.0	0.0	0.0	0.0	0.0	0.0	0.0	0.0	0.0	0.0	0.0	0.0	0.0	0.0	10.0	0.0	23.0	0.0	0.0	5.0	74.0	0.0	0.0
02_U341F-U806R-NW3-2	22.0	24.0	0.0	295.0	0.0	0.0	191.0	169.0	54.0	0.0	0.0	0.0	0.0	51.0	38.0	0.0	62.0	0.0	7.0	2864.0	0.0	0.0	0.0	0.0	0.0	0.0	0.0	0.0	20.0	0.0	0.0	0.0	0.0	6.0	0.0	0.0	0.0	0.0	0.0	11.0	92.0	0.0	5.0	0.0	30.0	0.0	43.0	0.0	0.0
03_U341F-U806R-NW3-3	0.0	0.0	0.0	1456.0	0.0	0.0	8.0	213.0	0.0	0.0	0.0	0.0	0.0	0.0	0.0	0.0	0.0	0.0	133.0	1042.0	0.0	7.0	0.0	0.0	0.0	0.0	0.0	0.0	0.0	0.0	0.0	0.0	0.0	0.0	0.0	0.0	0.0	0.0	0.0	0.0	5.0	0.0	0.0	0.0	55.0	0.0	248.0	0.0	0.0
04_U341F-U806R-NW3-4	0.0	66.0	0.0	37.0	0.0	0.0	118.0	372.0	0.0	0.0	0.0	0.0	0.0	0.0	102.0	0.0	13.0	0.0	1788.0	2257.0	0.0	0.0	0.0	0.0	0.0	0.0	0.0	0.0	0.0	0.0	0.0	0.0	0.0	0.0	0.0	0.0	0.0	0.0	0.0	10.0	0.0	23.0	59.0	0.0	1067.0	0.0	31.0	0.0	0.0
05_U341F-U806R-NW3-5	0.0	0.0	0.0	0.0	0.0	0.0	52.0	28.0	0.0	0.0	0.0	0.0	0.0	0.0	0.0	0.0	0.0	0.0	181.0	233.0	0.0	0.0	0.0	0.0	0.0	0.0	0.0	0.0	0.0	0.0	0.0	0.0	0.0	0.0	0.0	0.0	0.0	0.0	0.0	0.0	0.0	0.0	0.0	0.0	56.0	0.0	209.0	0.0	0.0
06_U341F-U806R-NW3-6	13.0	8.0	0.0	1081.0	0.0	0.0	145.0	310.0	17.0	0.0	0.0	0.0	0.0	24.0	0.0	0.0	37.0	0.0	10.0	2421.0	0.0	0.0	0.0	0.0	0.0	0.0	0.0	0.0	0.0	0.0	0.0	0.0	0.0	8.0	0.0	0.0	0.0	0.0	0.0	7.0	50.0	0.0	0.0	0.0	27.0	13.0	4.0	0.0	0.0
07_U341F-U806R-NW3-8	0.0	0.0	0.0	100.0	0.0	0.0	19.0	91.0	0.0	0.0	0.0	0.0	0.0	0.0	0.0	0.0	0.0	0.0	851.0	1774.0	0.0	0.0	0.0	0.0	0.0	0.0	0.0	0.0	0.0	0.0	0.0	0.0	0.0	0.0	0.0	0.0	0.0	0.0	0.0	0.0	0.0	0.0	13.0	0.0	21.0	0.0	439.0	6.0	21.0
08_U341F-U806R-NW3-9	0.0	0.0	0.0	0.0	0.0	0.0	0.0	76.0	0.0	0.0	0.0	0.0	0.0	0.0	0.0	0.0	0.0	0.0	298.0	105.0	0.0	0.0	0.0	0.0	0.0	0.0	0.0	0.0	0.0	0.0	0.0	0.0	0.0	0.0	0.0	0.0	0.0	0.0	0.0	0.0	0.0	0.0	0.0	0.0	0.0	0.0	147.0	13.0	0.0
09_U341F-U806R-NW3-10	8.0	51.0	0.0	718.0	0.0	0.0	68.0	208.0	54.0	0.0	0.0	0.0	0.0	30.0	0.0	0.0	48.0	0.0	0.0	4115.0	0.0	0.0	0.0	0.0	0.0	0.0	0.0	0.0	0.0	0.0	0.0	0.0	0.0	0.0	0.0	0.0	0.0	2.0	0.0	5.0	77.0	0.0	0.0	0.0	83.0	34.0	6.0	4.0	4.0
10_U341F-U806R-NW3-11	0.0	81.0	0.0	0.0	0.0	0.0	20.0	442.0	0.0	0.0	0.0	0.0	0.0	0.0	0.0	0.0	0.0	0.0	885.0	424.0	0.0	0.0	0.0	0.0	0.0	0.0	0.0	0.0	0.0	0.0	0.0	0.0	0.0	0.0	0.0	0.0	0.0	0.0	0.0	0.0	0.0	0.0	0.0	37.0	0.0	10.0	512.0	17.0	44.0
11_U341F-U806R-NW3-12	0.0	0.0	11.0	18.0	6.0	0.0	126.0	266.0	19.0	0.0	0.0	0.0	0.0	0.0	0.0	0.0	0.0	0.0	226.0	1192.0	0.0	0.0	0.0	0.0	0.0	0.0	0.0	0.0	0.0	0.0	0.0	0.0	0.0	0.0	0.0	0.0	0.0	0.0	0.0	7.0	22.0	0.0	0.0	0.0	54.0	10.0	329.0	9.0	0.0
12_U341F-U806R-NW3-14	0.0	15.0	13.0	12.0	0.0	0.0	21.0	247.0	0.0	0.0	0.0	0.0	0.0	0.0	0.0	0.0	0.0	0.0	307.0	2358.0	0.0	0.0	0.0	0.0	0.0	0.0	0.0	0.0	0.0	0.0	0.0	0.0	0.0	0.0	0.0	0.0	0.0	0.0	0.0	0.0	0.0	0.0	32.0	0.0	55.0	0.0	249.0	10.0	0.0
13_U341F-U806R-NW3-15	0.0	10.0	24.0	583.0	4.0	0.0	34.0	451.0	0.0	0.0	0.0	0.0	0.0	35.0	0.0	0.0	0.0	0.0	822.0	851.0	0.0	0.0	0.0	0.0	0.0	0.0	0.0	0.0	0.0	0.0	0.0	0.0	0.0	0.0	0.0	0.0	0.0	0.0	0.0	0.0	0.0	0.0	167.0	0.0	318.0	22.0	482.0	21.0	44.0
14_U341F-U806R-NW3-7	0.0	13.0	94.0	697.0	0.0	0.0	224.0	905.0	10.0	9.0	0.0	16.0	112.0	208.0	0.0	15.0	0.0	8.0	8.0	2446.0	0.0	0.0	33.0	17.0	14.0	0.0	16.0	6.0	227.0	35.0	15.0	8.0	147.0	0.0	3.0	0.0	0.0	0.0	793.0	0.0	0.0	0.0	0.0	0.0	45.0	12.0	10.0	4.0	0.0
15_U341F-U806R-NW3-13	0.0	14.0	0.0	294.0	0.0	5.0	0.0	16.0	0.0	0.0	14.0	0.0	110.0	888.0	0.0	0.0	0.0	0.0	0.0	1496.0	11.0	0.0	20.0	0.0	0.0	33.0	0.0	0.0	124.0	9.0	0.0	0.0	11.0	0.0	0.0	4.0	28.0	0.0	0.0	0.0	0.0	0.0	0.0	0.0	14.0	0.0	0.0	0.0	0.0
[truncated: 59 more columns]
