# Supplementary material for: Arsenic metabolism in technical biogas plants: possible consequences for resident microbiota and downstream units
Source: AMB Express. 2019 Nov 28;9:190. doi: 10.1186/s13568-019-0902-6 (PMC6882981; doi:10.1186/s13568-019-0902-6)
Supplement: Supplementary file 2 — Additional file 2. Additional electronic material, which provides full dataset of Figure 1 (Qiime2 files). [file 13568_2019_902_MOESM2_ESM.qzv › 41ab44e8-4670-4568-81db-98b188333850/data/level-4.jsonp]

load_data(4,["k__Archaea;p__Crenarchaeota;c__MCG;o__pGrfC26", "k__Archaea;p__Euryarchaeota;c__Methanobacteria;o__Methanobacteriales", "k__Archaea;p__Euryarchaeota;c__Methanomicrobia;o__Methanomicrobiales", "k__Archaea;p__Euryarchaeota;c__Methanomicrobia;o__Methanosarcinales", "k__Archaea;p__Euryarchaeota;c__Thermoplasmata;o__E2", "k__Archaea;p__[Parvarchaeota];c__[Parvarchaea];o__WCHD3-30", "k__Bacteria;__;__;__", "k__Bacteria;p__;c__;o__", "k__Bacteria;p__Acidobacteria;c__BPC102;o__MVS-40", "k__Bacteria;p__Acidobacteria;c__Solibacteres;o__Solibacterales", "k__Bacteria;p__Acidobacteria;c__[Chloracidobacteria];o__RB41", "k__Bacteria;p__Actinobacteria;c__;o__", "k__Bacteria;p__Actinobacteria;c__Acidimicrobiia;o__Acidimicrobiales", "k__Bacteria;p__Actinobacteria;c__Actinobacteria;o__Actinomycetales", "k__Bacteria;p__Actinobacteria;c__Actinobacteria;o__Bifidobacteriales", "k__Bacteria;p__Actinobacteria;c__Actinobacteria;o__WCHB1-81", "k__Bacteria;p__Actinobacteria;c__Coriobacteriia;o__Coriobacteriales", "k__Bacteria;p__Armatimonadetes;c__SJA-176;o__GAB-B06", "k__Bacteria;p__Bacteroidetes;__;__", "k__Bacteria;p__Bacteroidetes;c__Bacteroidia;o__Bacteroidales", "k__Bacteria;p__Bacteroidetes;c__Flavobacteriia;o__Flavobacteriales", "k__Bacteria;p__Bacteroidetes;c__Sphingobacteriia;o__Sphingobacteriales", "k__Bacteria;p__Bacteroidetes;c__[Saprospirae];o__[Saprospirales]", "k__Bacteria;p__Caldiserica;c__OP5;o__WCHB1-02", "k__Bacteria;p__Caldiserica;c__TTA-B1;o__", "k__Bacteria;p__Chlorobi;c__Ignavibacteria;o__Ignavibacteriales", "k__Bacteria;p__Chlorobi;c__SJA-28;o__", "k__Bacteria;p__Chloroflexi;c__;o__", "k__Bacteria;p__Chloroflexi;c__Anaerolineae;o__Anaerolineales", "k__Bacteria;p__Chloroflexi;c__Anaerolineae;o__Caldilineales", "k__Bacteria;p__Chloroflexi;c__Anaerolineae;o__OPB11", "k__Bacteria;p__Chloroflexi;c__Anaerolineae;o__SBR1031", "k__Bacteria;p__Chloroflexi;c__Anaerolineae;o__SHA-20", "k__Bacteria;p__Chloroflexi;c__Dehalococcoidetes;o__Dehalococcoidales", "k__Bacteria;p__Chloroflexi;c__Ellin6529;o__", "k__Bacteria;p__Chloroflexi;c__TK17;o__mle1-48", "k__Bacteria;p__Chloroflexi;c__Thermomicrobia;o__JG30-KF-CM45", "k__Bacteria;p__Cyanobacteria;c__Chloroplast;o__Streptophyta", "k__Bacteria;p__EM3;c__;o__", "k__Bacteria;p__Fibrobacteres;c__Fibrobacteria;o__Fibrobacterales", "k__Bacteria;p__Fibrobacteres;c__TG3;o__TG3-1", "k__Bacteria;p__Firmicutes;c__Bacilli;__", "k__Bacteria;p__Firmicutes;c__Bacilli;o__Bacillales", "k__Bacteria;p__Firmicutes;c__Bacilli;o__Haloplasmatales", "k__Bacteria;p__Firmicutes;c__Bacilli;o__Lactobacillales", "k__Bacteria;p__Firmicutes;c__Bacilli;o__Turicibacterales", "k__Bacteria;p__Firmicutes;c__Clostridia;__", "k__Bacteria;p__Firmicutes;c__Clostridia;o__", "k__Bacteria;p__Firmicutes;c__Clostridia;o__BSA2B-08", "k__Bacteria;p__Firmicutes;c__Clostridia;o__Clostridiales", "k__Bacteria;p__Firmicutes;c__Clostridia;o__Halanaerobiales", "k__Bacteria;p__Firmicutes;c__Clostridia;o__MBA08", "k__Bacteria;p__Firmicutes;c__Clostridia;o__Natranaerobiales", "k__Bacteria;p__Firmicutes;c__Clostridia;o__OPB54", "k__Bacteria;p__Firmicutes;c__Clostridia;o__SHA-98", "k__Bacteria;p__Firmicutes;c__Clostridia;o__Thermoanaerobacterales", "k__Bacteria;p__Firmicutes;c__Erysipelotrichi;o__Erysipelotrichales", "k__Bacteria;p__Firmicutes;c__OPB54;o__", "k__Bacteria;p__NKB19;c__noFP_H4;o__", "k__Bacteria;p__OD1;c__;o__", "k__Bacteria;p__OD1;c__ABY1;o__", "k__Bacteria;p__OP1;c__OPB14;o__", "k__Bacteria;p__OP8;c__OP8_1;o__OPB95", "k__Bacteria;p__OP9;c__JS1;o__BA021", "k__Bacteria;p__OP9;c__OPB46;o__OPB72", "k__Bacteria;p__OP9;c__OPB46;o__SHA-1", "k__Bacteria;p__Proteobacteria;c__Alphaproteobacteria;__", "k__Bacteria;p__Proteobacteria;c__Alphaproteobacteria;o__Rhizobiales", "k__Bacteria;p__Proteobacteria;c__Alphaproteobacteria;o__Rhodobacterales", "k__Bacteria;p__Proteobacteria;c__Alphaproteobacteria;o__Rhodospirillales", "k__Bacteria;p__Proteobacteria;c__Alphaproteobacteria;o__Sphingomonadales", "k__Bacteria;p__Proteobacteria;c__Betaproteobacteria;__", "k__Bacteria;p__Proteobacteria;c__Betaproteobacteria;o__Burkholderiales", "k__Bacteria;p__Proteobacteria;c__Betaproteobacteria;o__Thiobacterales", "k__Bacteria;p__Proteobacteria;c__Deltaproteobacteria;__", "k__Bacteria;p__Proteobacteria;c__Deltaproteobacteria;o__", "k__Bacteria;p__Proteobacteria;c__Deltaproteobacteria;o__Syntrophobacterales", "k__Bacteria;p__Proteobacteria;c__Epsilonproteobacteria;o__Campylobacterales", "k__Bacteria;p__Proteobacteria;c__Gammaproteobacteria;__", "k__Bacteria;p__Proteobacteria;c__Gammaproteobacteria;o__Aeromonadales", "k__Bacteria;p__Proteobacteria;c__Gammaproteobacteria;o__Pseudomonadales", "k__Bacteria;p__Proteobacteria;c__Gammaproteobacteria;o__Xanthomonadales", "k__Bacteria;p__SAR406;c__AB16;o__noFP_H7", "k__Bacteria;p__SR1;c__;o__", "k__Bacteria;p__Spirochaetes;c__MVP-15;o__PL-11B10", "k__Bacteria;p__Spirochaetes;c__Spirochaetes;o__Sphaerochaetales", "k__Bacteria;p__Spirochaetes;c__Spirochaetes;o__Spirochaetales", "k__Bacteria;p__Spirochaetes;c__[Leptospirae];o__[Leptospirales]", "k__Bacteria;p__Synergistetes;c__Synergistia;o__Synergistales", "k__Bacteria;p__TA06;c__;o__", "k__Bacteria;p__TM7;c__TM7-1;o__", "k__Bacteria;p__TM7;c__TM7-3;__", "k__Bacteria;p__TM7;c__TM7-3;o__", "k__Bacteria;p__TM7;c__TM7-3;o__CW040", "k__Bacteria;p__TM7;c__TM7-3;o__I025", "k__Bacteria;p__Tenericutes;c__Mollicutes;o__", "k__Bacteria;p__Tenericutes;c__Mollicutes;o__Acholeplasmatales", "k__Bacteria;p__Tenericutes;c__Mollicutes;o__RF39", "k__Bacteria;p__Tenericutes;c__RF3;o__ML615J-28", "k__Bacteria;p__Thermotogae;c__Thermotogae;o__Thermotogales", "k__Bacteria;p__Verrucomicrobia;c__Verruco-5;o__LD1-PB3", "k__Bacteria;p__Verrucomicrobia;c__[Pedosphaerae];o__[Pedosphaerales]", "k__Bacteria;p__WPS-2;c__;o__", "k__Bacteria;p__WS6;c__SC72;o__A-2AF", "k__Bacteria;p__WS6;c__SC72;o__WCHB1-15", "k__Bacteria;p__WWE1;c__[Cloacamonae];o__[Cloacamonales]"],["index", "k__Archaea;p__Crenarchaeota;c__MCG;o__pGrfC26", "k__Archaea;p__Euryarchaeota;c__Methanobacteria;o__Methanobacteriales", "k__Archaea;p__Euryarchaeota;c__Methanomicrobia;o__Methanomicrobiales", "k__Archaea;p__Euryarchaeota;c__Methanomicrobia;o__Methanosarcinales", "k__Archaea;p__Euryarchaeota;c__Thermoplasmata;o__E2", "k__Archaea;p__[Parvarchaeota];c__[Parvarchaea];o__WCHD3-30", "k__Bacteria;__;__;__", "k__Bacteria;p__;c__;o__", "k__Bacteria;p__Acidobacteria;c__BPC102;o__MVS-40", "k__Bacteria;p__Acidobacteria;c__Solibacteres;o__Solibacterales", "k__Bacteria;p__Acidobacteria;c__[Chloracidobacteria];o__RB41", "k__Bacteria;p__Actinobacteria;c__;o__", "k__Bacteria;p__Actinobacteria;c__Acidimicrobiia;o__Acidimicrobiales", "k__Bacteria;p__Actinobacteria;c__Actinobacteria;o__Actinomycetales", "k__Bacteria;p__Actinobacteria;c__Actinobacteria;o__Bifidobacteriales", "k__Bacteria;p__Actinobacteria;c__Actinobacteria;o__WCHB1-81", "k__Bacteria;p__Actinobacteria;c__Coriobacteriia;o__Coriobacteriales", "k__Bacteria;p__Armatimonadetes;c__SJA-176;o__GAB-B06", "k__Bacteria;p__Bacteroidetes;__;__", "k__Bacteria;p__Bacteroidetes;c__Bacteroidia;o__Bacteroidales", "k__Bacteria;p__Bacteroidetes;c__Flavobacteriia;o__Flavobacteriales", "k__Bacteria;p__Bacteroidetes;c__Sphingobacteriia;o__Sphingobacteriales", "k__Bacteria;p__Bacteroidetes;c__[Saprospirae];o__[Saprospirales]", "k__Bacteria;p__Caldiserica;c__OP5;o__WCHB1-02", "k__Bacteria;p__Caldiserica;c__TTA-B1;o__", "k__Bacteria;p__Chlorobi;c__Ignavibacteria;o__Ignavibacteriales", "k__Bacteria;p__Chlorobi;c__SJA-28;o__", "k__Bacteria;p__Chloroflexi;c__;o__", "k__Bacteria;p__Chloroflexi;c__Anaerolineae;o__Anaerolineales", "k__Bacteria;p__Chloroflexi;c__Anaerolineae;o__Caldilineales", "k__Bacteria;p__Chloroflexi;c__Anaerolineae;o__OPB11", "k__Bacteria;p__Chloroflexi;c__Anaerolineae;o__SBR1031", "k__Bacteria;p__Chloroflexi;c__Anaerolineae;o__SHA-20", "k__Bacteria;p__Chloroflexi;c__Dehalococcoidetes;o__Dehalococcoidales", "k__Bacteria;p__Chloroflexi;c__Ellin6529;o__", "k__Bacteria;p__Chloroflexi;c__TK17;o__mle1-48", "k__Bacteria;p__Chloroflexi;c__Thermomicrobia;o__JG30-KF-CM45", "k__Bacteria;p__Cyanobacteria;c__Chloroplast;o__Streptophyta", "k__Bacteria;p__EM3;c__;o__", "k__Bacteria;p__Fibrobacteres;c__Fibrobacteria;o__Fibrobacterales", "k__Bacteria;p__Fibrobacteres;c__TG3;o__TG3-1", "k__Bacteria;p__Firmicutes;c__Bacilli;__", "k__Bacteria;p__Firmicutes;c__Bacilli;o__Bacillales", "k__Bacteria;p__Firmicutes;c__Bacilli;o__Haloplasmatales", "k__Bacteria;p__Firmicutes;c__Bacilli;o__Lactobacillales", "k__Bacteria;p__Firmicutes;c__Bacilli;o__Turicibacterales", "k__Bacteria;p__Firmicutes;c__Clostridia;__", "k__Bacteria;p__Firmicutes;c__Clostridia;o__", "k__Bacteria;p__Firmicutes;c__Clostridia;o__BSA2B-08", "k__Bacteria;p__Firmicutes;c__Clostridia;o__Clostridiales", "k__Bacteria;p__Firmicutes;c__Clostridia;o__Halanaerobiales", "k__Bacteria;p__Firmicutes;c__Clostridia;o__MBA08", "k__Bacteria;p__Firmicutes;c__Clostridia;o__Natranaerobiales", "k__Bacteria;p__Firmicutes;c__Clostridia;o__OPB54", "k__Bacteria;p__Firmicutes;c__Clostridia;o__SHA-98", "k__Bacteria;p__Firmicutes;c__Clostridia;o__Thermoanaerobacterales", "k__Bacteria;p__Firmicutes;c__Erysipelotrichi;o__Erysipelotrichales", "k__Bacteria;p__Firmicutes;c__OPB54;o__", "k__Bacteria;p__NKB19;c__noFP_H4;o__", "k__Bacteria;p__OD1;c__;o__", "k__Bacteria;p__OD1;c__ABY1;o__", "k__Bacteria;p__OP1;c__OPB14;o__", "k__Bacteria;p__OP8;c__OP8_1;o__OPB95", "k__Bacteria;p__OP9;c__JS1;o__BA021", "k__Bacteria;p__OP9;c__OPB46;o__OPB72", "k__Bacteria;p__OP9;c__OPB46;o__SHA-1", "k__Bacteria;p__Proteobacteria;c__Alphaproteobacteria;__", "k__Bacteria;p__Proteobacteria;c__Alphaproteobacteria;o__Rhizobiales", "k__Bacteria;p__Proteobacteria;c__Alphaproteobacteria;o__Rhodobacterales", "k__Bacteria;p__Proteobacteria;c__Alphaproteobacteria;o__Rhodospirillales", "k__Bacteria;p__Proteobacteria;c__Alphaproteobacteria;o__Sphingomonadales", "k__Bacteria;p__Proteobacteria;c__Betaproteobacteria;__", "k__Bacteria;p__Proteobacteria;c__Betaproteobacteria;o__Burkholderiales", "k__Bacteria;p__Proteobacteria;c__Betaproteobacteria;o__Thiobacterales", "k__Bacteria;p__Proteobacteria;c__Deltaproteobacteria;__", "k__Bacteria;p__Proteobacteria;c__Deltaproteobacteria;o__", "k__Bacteria;p__Proteobacteria;c__Deltaproteobacteria;o__Syntrophobacterales", "k__Bacteria;p__Proteobacteria;c__Epsilonproteobacteria;o__Campylobacterales", "k__Bacteria;p__Proteobacteria;c__Gammaproteobacteria;__", "k__Bacteria;p__Proteobacteria;c__Gammaproteobacteria;o__Aeromonadales", "k__Bacteria;p__Proteobacteria;c__Gammaproteobacteria;o__Pseudomonadales", "k__Bacteria;p__Proteobacteria;c__Gammaproteobacteria;o__Xanthomonadales", "k__Bacteria;p__SAR406;c__AB16;o__noFP_H7", "k__Bacteria;p__SR1;c__;o__", "k__Bacteria;p__Spirochaetes;c__MVP-15;o__PL-11B10", "k__Bacteria;p__Spirochaetes;c__Spirochaetes;o__Sphaerochaetales", "k__Bacteria;p__Spirochaetes;c__Spirochaetes;o__Spirochaetales", "k__Bacteria;p__Spirochaetes;c__[Leptospirae];o__[Leptospirales]", "k__Bacteria;p__Synergistetes;c__Synergistia;o__Synergistales", "k__Bacteria;p__TA06;c__;o__", "k__Bacteria;p__TM7;c__TM7-1;o__", "k__Bacteria;p__TM7;c__TM7-3;__", "k__Bacteria;p__TM7;c__TM7-3;o__", "k__Bacteria;p__TM7;c__TM7-3;o__CW040", "k__Bacteria;p__TM7;c__TM7-3;o__I025", "k__Bacteria;p__Tenericutes;c__Mollicutes;o__", "k__Bacteria;p__Tenericutes;c__Mollicutes;o__Acholeplasmatales", "k__Bacteria;p__Tenericutes;c__Mollicutes;o__RF39", "k__Bacteria;p__Tenericutes;c__RF3;o__ML615J-28", "k__Bacteria;p__Thermotogae;c__Thermotogae;o__Thermotogales", "k__Bacteria;p__Verrucomicrobia;c__Verruco-5;o__LD1-PB3", "k__Bacteria;p__Verrucomicrobia;c__[Pedosphaerae];o__[Pedosphaerales]", "k__Bacteria;p__WPS-2;c__;o__", "k__Bacteria;p__WS6;c__SC72;o__A-2AF", "k__Bacteria;p__WS6;c__SC72;o__WCHB1-15", "k__Bacteria;p__WWE1;c__[Cloacamonae];o__[Cloacamonales]", "plant type", "plant no."],[{"index":"01_U341F-U806R-NW3-1","k__Archaea;p__Crenarchaeota;c__MCG;o__pGrfC26":0.0,"k__Archaea;p__Euryarchaeota;c__Methanobacteria;o__Methanobacteriales":0.0,"k__Archaea;p__Euryarchaeota;c__Methanomicrobia;o__Methanomicrobiales":0.0,"k__Archaea;p__Euryarchaeota;c__Methanomicrobia;o__Methanosarcinales":97.0,"k__Archaea;p__Euryarchaeota;c__Thermoplasmata;o__E2":0.0,"k__Archaea;p__[Parvarchaeota];c__[Parvarchaea];o__WCHD3-30":0.0,"k__Bacteria;__;__;__":0.0,"k__Bacteria;p__;c__;o__":35.0,"k__Bacteria;p__Acidobacteria;c__BPC102;o__MVS-40":0.0,"k__Bacteria;p__Acidobacteria;c__Solibacteres;o__Solibacterales":0.0,"k__Bacteria;p__Acidobacteria;c__[Chloracidobacteria];o__RB41":0.0,"k__Bacteria;p__Actinobacteria;c__;o__":0.0,"k__Bacteria;p__Actinobacteria;c__Acidimicrobiia;o__Acidimicrobiales":0.0,"k__Bacteria;p__Actinobacteria;c__Actinobacteria;o__Actinomycetales":9.0,"k__Bacteria;p__Actinobacteria;c__Actinobacteria;o__Bifidobacteriales":0.0,"k__Bacteria;p__Actinobacteria;c__Actinobacteria;o__WCHB1-81":0.0,"k__Bacteria;p__Actinobacteria;c__Coriobacteriia;o__Coriobacteriales":0.0,"k__Bacteria;p__Armatimonadetes;c__SJA-176;o__GAB-B06":0.0,"k__Bacteria;p__Bacteroidetes;__;__":117.0,"k__Bacteria;p__Bacteroidetes;c__Bacteroidia;o__Bacteroidales":315.0,"k__Bacteria;p__Bacteroidetes;c__Flavobacteriia;o__Flavobacteriales":0.0,"k__Bacteria;p__Bacteroidetes;c__Sphingobacteriia;o__Sphingobacteriales":0.0,"k__Bacteria;p__Bacteroidetes;c__[Saprospirae];o__[Saprospirales]":0.0,"k__Bacteria;p__Caldiserica;c__OP5;o__WCHB1-02":0.0,"k__Bacteria;p__Caldiserica;c__TTA-B1;o__":0.0,"k__Bacteria;p__Chlorobi;c__Ignavibacteria;o__Ignavibacteriales":0.0,"k__Bacteria;p__Chlorobi;c__SJA-28;o__":0.0,"k__Bacteria;p__Chloroflexi;c__;o__":0.0,"k__Bacteria;p__Chloroflexi;c__Anaerolineae;o__Anaerolineales":0.0,"k__Bacteria;p__Chloroflexi;c__Anaerolineae;o__Caldilineales":0.0,"k__Bacteria;p__Chloroflexi;c__Anaerolineae;o__OPB11":0.0,"k__Bacteria;p__Chloroflexi;c__Anaerolineae;o__SBR1031":0.0,"k__Bacteria;p__Chloroflexi;c__Anaerolineae;o__SHA-20":0.0,"k__Bacteria;p__Chloroflexi;c__Dehalococcoidetes;o__Dehalococcoidales":0.0,"k__Bacteria;p__Chloroflexi;c__Ellin6529;o__":0.0,"k__Bacteria;p__Chloroflexi;c__TK17;o__mle1-48":0.0,"k__Bacteria;p__Chloroflexi;c__Thermomicrobia;o__JG30-KF-CM45":0.0,"k__Bacteria;p__Cyanobacteria;c__Chloroplast;o__Streptophyta":0.0,"k__Bacteria;p__EM3;c__;o__":0.0,"k__Bacteria;p__Fibrobacteres;c__Fibrobacteria;o__Fibrobacterales":0.0,"k__Bacteria;p__Fibrobacteres;c__TG3;o__TG3-1":10.0,"k__Bacteria;p__Firmicutes;c__Bacilli;__":0.0,"k__Bacteria;p__Firmicutes;c__Bacilli;o__Bacillales":23.0,"k__Bacteria;p__Firmicutes;c__Bacilli;o__Haloplasmatales":0.0,"k__Bacteria;p__Firmicutes;c__Bacilli;o__Lactobacillales":0.0,"k__Bacteria;p__Firmicutes;c__Bacilli;o__Turicibacterales":5.0,"k__Bacteria;p__Firmicutes;c__Clostridia;__":74.0,"k__Bacteria;p__Firmicutes;c__Clostridia;o__":0.0,"k__Bacteria;p__Firmicutes;c__Clostridia;o__BSA2B-08":0.0,"k__Bacteria;p__Firmicutes;c__Clostridia;o__Clostridiales":447.0,"k__Bacteria;p__Firmicutes;c__Clostridia;o__Halanaerobiales":11.0,"k__Bacteria;p__Firmicutes;c__Clostridia;o__MBA08":959.0,"k__Bacteria;p__Firmicutes;c__Clostridia;o__Natranaerobiales":0.0,"k__Bacteria;p__Firmicutes;c__Clostridia;o__OPB54":0.0,"k__Bacteria;p__Firmicutes;c__Clostridia;o__SHA-98":134.0,"k__Bacteria;p__Firmicutes;c__Clostridia;o__Thermoanaerobacterales":58.0,"k__Bacteria;p__Firmicutes;c__Erysipelotrichi;o__Erysipelotrichales":0.0,"k__Bacteria;p__Firmicutes;c__OPB54;o__":5.0,"k__Bacteria;p__NKB19;c__noFP_H4;o__":0.0,"k__Bacteria;p__OD1;c__;o__":0.0,"k__Bacteria;p__OD1;c__ABY1;o__":0.0,"k__Bacteria;p__OP1;c__OPB14;o__":0.0,"k__Bacteria;p__OP8;c__OP8_1;o__OPB95":0.0,"k__Bacteria;p__OP9;c__JS1;o__BA021":0.0,"k__Bacteria;p__OP9;c__OPB46;o__OPB72":55.0,"k__Bacteria;p__OP9;c__OPB46;o__SHA-1":0.0,"k__Bacteria;p__Proteobacteria;c__Alphaproteobacteria;__":0.0,"k__Bacteria;p__Proteobacteria;c__Alphaproteobacteria;o__Rhizobiales":0.0,"k__Bacteria;p__Proteobacteria;c__Alphaproteobacteria;o__Rhodobacterales":0.0,"k__Bacteria;p__Proteobacteria;c__Alphaproteobacteria;o__Rhodospirillales":0.0,"k__Bacteria;p__Proteobacteria;c__Alphaproteobacteria;o__Sphingomonadales":0.0,"k__Bacteria;p__Proteobacteria;c__Betaproteobacteria;__":0.0,"k__Bacteria;p__Proteobacteria;c__Betaproteobacteria;o__Burkholderiales":0.0,"k__Bacteria;p__Proteobacteria;c__Betaproteobacteria;o__Thiobacterales":0.0,"k__Bacteria;p__Proteobacteria;c__Deltaproteobacteria;__":0.0,"k__Bacteria;p__Proteobacteria;c__Deltaproteobacteria;o__":0.0,"k__Bacteria;p__Proteobacteria;c__Deltaproteobacteria;o__Syntrophobacterales":0.0,"k__Bacteria;p__Proteobacteria;c__Epsilonproteobacteria;o__Campylobacterales":0.0,"k__Bacteria;p__Proteobacteria;c__Gammaproteobacteria;__":0.0,"k__Bacteria;p__Proteobacteria;c__Gammaproteobacteria;o__Aeromonadales":0.0,"k__Bacteria;p__Proteobacteria;c__Gammaproteobacteria;o__Pseudomonadales":0.0,"k__Bacteria;p__Proteobacteria;c__Gammaproteobacteria;o__Xanthomonadales":0.0,"k__Bacteria;p__SAR406;c__AB16;o__noFP_H7":0.0,"k__Bacteria;p__SR1;c__;o__":2.0,"k__Bacteria;p__Spirochaetes;c__MVP-15;o__PL-11B10":0.0,"k__Bacteria;p__Spirochaetes;c__Spirochaetes;o__Sphaerochaetales":0.0,"k__Bacteria;p__Spirochaetes;c__Spirochaetes;o__Spirochaetales":10.0,"k__Bacteria;p__Spirochaetes;c__[Leptospirae];o__[Leptospirales]":0.0,"k__Bacteria;p__Synergistetes;c__Synergistia;o__Synergistales":111.0,"k__Bacteria;p__TA06;c__;o__":0.0,"k__Bacteria;p__TM7;c__TM7-1;o__":0.0,"k__Bacteria;p__TM7;c__TM7-3;__":0.0,"k__Bacteria;p__TM7;c__TM7-3;o__":0.0,"k__Bacteria;p__TM7;c__TM7-3;o__CW040":0.0,"k__Bacteria;p__TM7;c__TM7-3;o__I025":0.0,"k__Bacteria;p__Tenericutes;c__Mollicutes;o__":0.0,"k__Bacteria;p__Tenericutes;c__Mollicutes;o__Acholeplasmatales":0.0,"k__Bacteria;p__Tenericutes;c__Mollicutes;o__RF39":0.0,"k__Bacteria;p__Tenericutes;c__RF3;o__ML615J-28":16.0,"k__Bacteria;p__Thermotogae;c__Thermotogae;o__Thermotogales":110.0,"k__Bacteria;p__Verrucomicrobia;c__Verruco-5;o__LD1-PB3":0.0,"k__Bacteria;p__Verrucomicrobia;c__[Pedosphaerae];o__[Pedosphaerales]":0.0,"k__Bacteria;p__WPS-2;c__;o__":0.0,"k__Bacteria;p__WS6;c__SC72;o__A-2AF":0.0,"k__Bacteria;p__WS6;c__SC72;o__WCHB1-15":0.0,"k__Bacteria;p__WWE1;c__[Cloacamonae];o__[Cloacamonales]":41.0,"plant type":"Biogas","plant no.":"#01"},{"index":"02_U341F-U806R-NW3-2","k__Archaea;p__Crenarchaeota;c__MCG;o__pGrfC26":22.0,"k__Archaea;p__Euryarchaeota;c__Methanobacteria;o__Methanobacteriales":24.0,"k__Archaea;p__Euryarchaeota;c__Methanomicrobia;o__Methanomicrobiales":0.0,"k__Archaea;p__Euryarchaeota;c__Methanomicrobia;o__Methanosarcinales":295.0,"k__Archaea;p__Euryarchaeota;c__Thermoplasmata;o__E2":0.0,"k__Archaea;p__[Parvarchaeota];c__[Parvarchaea];o__WCHD3-30":0.0,"k__Bacteria;__;__;__":191.0,"k__Bacteria;p__;c__;o__":169.0,"k__Bacteria;p__Acidobacteria;c__BPC102;o__MVS-40":54.0,"k__Bacteria;p__Acidobacteria;c__Solibacteres;o__Solibacterales":0.0,"k__Bacteria;p__Acidobacteria;c__[Chloracidobacteria];o__RB41":0.0,"k__Bacteria;p__Actinobacteria;c__;o__":0.0,"k__Bacteria;p__Actinobacteria;c__Acidimicrobiia;o__Acidimicrobiales":0.0,"k__Bacteria;p__Actinobacteria;c__Actinobacteria;o__Actinomycetales":51.0,"k__Bacteria;p__Actinobacteria;c__Actinobacteria;o__Bifidobacteriales":38.0,"k__Bacteria;p__Actinobacteria;c__Actinobacteria;o__WCHB1-81":0.0,"k__Bacteria;p__Actinobacteria;c__Coriobacteriia;o__Coriobacteriales":62.0,"k__Bacteria;p__Armatimonadetes;c__SJA-176;o__GAB-B06":0.0,"k__Bacteria;p__Bacteroidetes;__;__":7.0,"k__Bacteria;p__Bacteroidetes;c__Bacteroidia;o__Bacteroidales":2864.0,"k__Bacteria;p__Bacteroidetes;c__Flavobacteriia;o__Flavobacteriales":0.0,"k__Bacteria;p__Bacteroidetes;c__Sphingobacteriia;o__Sphingobacteriales":0.0,"k__Bacteria;p__Bacteroidetes;c__[Saprospirae];o__[Saprospirales]":0.0,"k__Bacteria;p__Caldiserica;c__OP5;o__WCHB1-02":0.0,"k__Bacteria;p__Caldiserica;c__TTA-B1;o__":0.0,"k__Bacteria;p__Chlorobi;c__Ignavibacteria;o__Ignavibacteriales":0.0,"k__Bacteria;p__Chlorobi;c__SJA-28;o__":0.0,"k__Bacteria;p__Chloroflexi;c__;o__":0.0,"k__Bacteria;p__Chloroflexi;c__Anaerolineae;o__Anaerolineales":20.0,"k__Bacteria;p__Chloroflexi;c__Anaerolineae;o__Caldilineales":0.0,"k__Bacteria;p__Chloroflexi;c__Anaerolineae;o__OPB11":0.0,"k__Bacteria;p__Chloroflexi;c__Anaerolineae;o__SBR1031":0.0,"k__Bacteria;p__Chloroflexi;c__Anaerolineae;o__SHA-20":0.0,"k__Bacteria;p__Chloroflexi;c__Dehalococcoidetes;o__Dehalococcoidales":6.0,"k__Bacteria;p__Chloroflexi;c__Ellin6529;o__":0.0,"k__Bacteria;p__Chloroflexi;c__TK17;o__mle1-48":0.0,"k__Bacteria;p__Chloroflexi;c__Thermomicrobia;o__JG30-KF-CM45":0.0,"k__Bacteria;p__Cyanobacteria;c__Chloroplast;o__Streptophyta":0.0,"k__Bacteria;p__EM3;c__;o__":0.0,"k__Bacteria;p__Fibrobacteres;c__Fibrobacteria;o__Fibrobacterales":11.0,"k__Bacteria;p__Fibrobacteres;c__TG3;o__TG3-1":92.0,"k__Bacteria;p__Firmicutes;c__Bacilli;__":0.0,"k__Bacteria;p__Firmicutes;c__Bacilli;o__Bacillales":5.0,"k__Bacteria;p__Firmicutes;c__Bacilli;o__Haloplasmatales":0.0,"k__Bacteria;p__Firmicutes;c__Bacilli;o__Lactobacillales":30.0,"k__Bacteria;p__Firmicutes;c__Bacilli;o__Turicibacterales":0.0,"k__Bacteria;p__Firmicutes;c__Clostridia;__":43.0,"k__Bacteria;p__Firmicutes;c__Clostridia;o__":0.0,"k__Bacteria;p__Firmicutes;c__Clostridia;o__BSA2B-08":0.0,"k__Bacteria;p__Firmicutes;c__Clostridia;o__Clostridiales":4788.0,"k__Bacteria;p__Firmicutes;c__Clostridia;o__Halanaerobiales":0.0,"k__Bacteria;p__Firmicutes;c__Clostridia;o__MBA08":1634.0,"k__Bacteria;p__Firmicutes;c__Clostridia;o__Natranaerobiales":44.0,"k__Bacteria;p__Firmicutes;c__Clostridia;o__OPB54":0.0,"k__Bacteria;p__Firmicutes;c__Clostridia;o__SHA-98":79.0,"k__Bacteria;p__Firmicutes;c__Clostridia;o__Thermoanaerobacterales":12.0,"k__Bacteria;p__Firmicutes;c__Erysipelotrichi;o__Erysipelotrichales":37.0,"k__Bacteria;p__Firmicutes;c__OPB54;o__":23.0,"k__Bacteria;p__NKB19;c__noFP_H4;o__":5.0,"k__Bacteria;p__OD1;c__;o__":0.0,"k__Bacteria;p__OD1;c__ABY1;o__":5.0,"k__Bacteria;p__OP1;c__OPB14;o__":0.0,"k__Bacteria;p__OP8;c__OP8_1;o__OPB95":0.0,"k__Bacteria;p__OP9;c__JS1;o__BA021":0.0,"k__Bacteria;p__OP9;c__OPB46;o__OPB72":0.0,"k__Bacteria;p__OP9;c__OPB46;o__SHA-1":26.0,"k__Bacteria;p__Proteobacteria;c__Alphaproteobacteria;__":0.0,"k__Bacteria;p__Proteobacteria;c__Alphaproteobacteria;o__Rhizobiales":0.0,"k__Bacteria;p__Proteobacteria;c__Alphaproteobacteria;o__Rhodobacterales":0.0,"k__Bacteria;p__Proteobacteria;c__Alphaproteobacteria;o__Rhodospirillales":0.0,"k__Bacteria;p__Proteobacteria;c__Alphaproteobacteria;o__Sphingomonadales":0.0,"k__Bacteria;p__Proteobacteria;c__Betaproteobacteria;__":0.0,"k__Bacteria;p__Proteobacteria;c__Betaproteobacteria;o__Burkholderiales":0.0,"k__Bacteria;p__Proteobacteria;c__Betaproteobacteria;o__Thiobacterales":0.0,"k__Bacteria;p__Proteobacteria;c__Deltaproteobacteria;__":19.0,"k__Bacteria;p__Proteobacteria;c__Deltaproteobacteria;o__":0.0,"k__Bacteria;p__Proteobacteria;c__Deltaproteobacteria;o__Syntrophobacterales":8.0,"k__Bacteria;p__Proteobacteria;c__Epsilonproteobacteria;o__Campylobacterales":0.0,"k__Bacteria;p__Proteobacteria;c__Gammaproteobacteria;__":0.0,"k__Bacteria;p__Proteobacteria;c__Gammaproteobacteria;o__Aeromonadales":0.0,"k__Bacteria;p__Proteobacteria;c__Gammaproteobacteria;o__Pseudomonadales":0.0,"k__Bacteria;p__Proteobacteria;c__Gammaproteobacteria;o__Xanthomonadales":0.0,"k__Bacteria;p__SAR406;c__AB16;o__noFP_H7":0.0,"k__Bacteria;p__SR1;c__;o__":39.0,"k__Bacteria;p__Spirochaetes;c__MVP-15;o__PL-11B10":16.0,"k__Bacteria;p__Spirochaetes;c__Spirochaetes;o__Sphaerochaetales":0.0,"k__Bacteria;p__Spirochaetes;c__Spirochaetes;o__Spirochaetales":81.0,"k__Bacteria;p__Spirochaetes;c__[Leptospirae];o__[Leptospirales]":0.0,"k__Bacteria;p__Synergistetes;c__Synergistia;o__Synergistales":64.0,"k__Bacteria;p__TA06;c__;o__":0.0,"k__Bacteria;p__TM7;c__TM7-1;o__":0.0,"k__Bacteria;p__TM7;c__TM7-3;__":0.0,"k__Bacteria;p__TM7;c__TM7-3;o__":0.0,"k__Bacteria;p__TM7;c__TM7-3;o__CW040":0.0,"k__Bacteria;p__TM7;c__TM7-3;o__I025":0.0,"k__Bacteria;p__Tenericutes;c__Mollicutes;o__":8.0,"k__Bacteria;p__Tenericutes;c__Mollicutes;o__Acholeplasmatales":17.0,"k__Bacteria;p__Tenericutes;c__Mollicutes;o__RF39":6.0,"k__Bacteria;p__Tenericutes;c__RF3;o__ML615J-28":62.0,"k__Bacteria;p__Thermotogae;c__Thermotogae;o__Thermotogales":5.0,"k__Bacteria;p__Verrucomicrobia;c__Verruco-5;o__LD1-PB3":0.0,"k__Bacteria;p__Verrucomicrobia;c__[Pedosphaerae];o__[Pedosphaerales]":0.0,"k__Bacteria;p__WPS-2;c__;o__":4.0,"k__Bacteria;p__WS6;c__SC72;o__A-2AF":7.0,"k__Bacteria;p__WS6;c__SC72;o__WCHB1-15":16.0,"k__Bacteria;p__WWE1;c__[Cloacamonae];o__[Cloacamonales]":1877.0,"plant type":"Biogas","plant no.":"#02"},{"index":"03_U341F-U806R-NW3-3","k__Archaea;p__Crenarchaeota;c__MCG;o__pGrfC26":0.0,"k__Archaea;p__Euryarchaeota;c__Methanobacteria;o__Methanobacteriales":0.0,"k__Archaea;p__Euryarchaeota;c__Methanomicrobia;o__Methanomicrobiales":0.0,"k__Archaea;p__Euryarchaeota;c__Methanomicrobia;o__Methanosarcinales":1456.0,"k__Archaea;p__Euryarchaeota;c__Thermoplasmata;o__E2":0.0,"k__Archaea;p__[Parvarchaeota];c__[Parvarchaea];o__WCHD3-30":0.0,"k__Bacteria;__;__;__":8.0,"k__Bacteria;p__;c__;o__":213.0,"k__Bacteria;p__Acidobacteria;c__BPC102;o__MVS-40":0.0,"k__Bacteria;p__Acidobacteria;c__Solibacteres;o__Solibacterales":0.0,"k__Bacteria;p__Acidobacteria;c__[Chloracidobacteria];o__RB41":0.0,"k__Bacteria;p__Actinobacteria;c__;o__":0.0,"k__Bacteria;p__Actinobacteria;c__Acidimicrobiia;o__Acidimicrobiales":0.0,"k__Bacteria;p__Actinobacteria;c__Actinobacteria;o__Actinomycetales":0.0,"k__Bacteria;p__Actinobacteria;c__Actinobacteria;o__Bifidobacteriales":0.0,"k__Bacteria;p__Actinobacteria;c__Actinobacteria;o__WCHB1-81":0.0,"k__Bacteria;p__Actinobacteria;c__Coriobacteriia;o__Coriobacteriales":0.0,"k__Bacteria;p__Armatimonadetes;c__SJA-176;o__GAB-B06":0.0,"k__Bacteria;p__Bacteroidetes;__;__":133.0,"k__Bacteria;p__Bacteroidetes;c__Bacteroidia;o__Bacteroidales":1042.0,"k__Bacteria;p__Bacteroidetes;c__Flavobacteriia;o__Flavobacteriales":0.0,"k__Bacteria;p__Bacteroidetes;c__Sphingobacteriia;o__Sphingobacteriales":7.0,"k__Bacteria;p__Bacteroidetes;c__[Saprospirae];o__[Saprospirales]":0.0,"k__Bacteria;p__Caldiserica;c__OP5;o__WCHB1-02":0.0,"k__Bacteria;p__Caldiserica;c__TTA-B1;o__":0.0,"k__Bacteria;p__Chlorobi;c__Ignavibacteria;o__Ignavibacteriales":0.0,"k__Bacteria;p__Chlorobi;c__SJA-28;o__":0.0,"k__Bacteria;p__Chloroflexi;c__;o__":0.0,"k__Bacteria;p__Chloroflexi;c__Anaerolineae;o__Anaerolineales":0.0,"k__Bacteria;p__Chloroflexi;c__Anaerolineae;o__Caldilineales":0.0,"k__Bacteria;p__Chloroflexi;c__Anaerolineae;o__OPB11":0.0,"k__Bacteria;p__Chloroflexi;c__Anaerolineae;o__SBR1031":0.0,"k__Bacteria;p__Chloroflexi;c__Anaerolineae;o__SHA-20":0.0,"k__Bacteria;p__Chloroflexi;c__Dehalococcoidetes;o__Dehalococcoidales":0.0,"k__Bacteria;p__Chloroflexi;c__Ellin6529;o__":0.0,"k__Bacteria;p__Chloroflexi;c__TK17;o__mle1-48":0.0,"k__Bacteria;p__Chloroflexi;c__Thermomicrobia;o__JG30-KF-CM45":0.0,"k__Bacteria;p__Cyanobacteria;c__Chloroplast;o__Streptophyta":0.0,"k__Bacteria;p__EM3;c__;o__":0.0,"k__Bacteria;p__Fibrobacteres;c__Fibrobacteria;o__Fibrobacterales":0.0,"k__Bacteria;p__Fibrobacteres;c__TG3;o__TG3-1":5.0,"k__Bacteria;p__Firmicutes;c__Bacilli;__":0.0,"k__Bacteria;p__Firmicutes;c__Bacilli;o__Bacillales":0.0,"k__Bacteria;p__Firmicutes;c__Bacilli;o__Haloplasmatales":0.0,"k__Bacteria;p__Firmicutes;c__Bacilli;o__Lactobacillales":55.0,"k__Bacteria;p__Firmicutes;c__Bacilli;o__Turicibacterales":0.0,"k__Bacteria;p__Firmicutes;c__Clostridia;__":248.0,"k__Bacteria;p__Firmicutes;c__Clostridia;o__":0.0,"k__Bacteria;p__Firmicutes;c__Clostridia;o__BSA2B-08":0.0,"k__Bacteria;p__Firmicutes;c__Clostridia;o__Clostridiales":1787.0,"k__Bacteria;p__Firmicutes;c__Clostridia;o__Halanaerobiales":0.0,"k__Bacteria;p__Firmicutes;c__Clostridia;o__MBA08":3861.0,"k__Bacteria;p__Firmicutes;c__Clostridia;o__Natranaerobiales":57.0,"k__Bacteria;p__Firmicutes;c__Clostridia;o__OPB54":32.0,"k__Bacteria;p__Firmicutes;c__Clostridia;o__SHA-98":1208.0,"k__Bacteria;p__Firmicutes;c__Clostridia;o__Thermoanaerobacterales":128.0,"k__Bacteria;p__Firmicutes;c__Erysipelotrichi;o__Erysipelotrichales":61.0,"k__Bacteria;p__Firmicutes;c__OPB54;o__":59.0,"k__Bacteria;p__NKB19;c__noFP_H4;o__":0.0,"k__Bacteria;p__OD1;c__;o__":0.0,"k__Bacteria;p__OD1;c__ABY1;o__":0.0,"k__Bacteria;p__OP1;c__OPB14;o__":0.0,"k__Bacteria;p__OP8;c__OP8_1;o__OPB95":0.0,"k__Bacteria;p__OP9;c__JS1;o__BA021":0.0,"k__Bacteria;p__OP9;c__OPB46;o__OPB72":32.0,"k__Bacteria;p__OP9;c__OPB46;o__SHA-1":16.0,"k__Bacteria;p__Proteobacteria;c__Alphaproteobacteria;__":0.0,"k__Bacteria;p__Proteobacteria;c__Alphaproteobacteria;o__Rhizobiales":0.0,"k__Bacteria;p__Proteobacteria;c__Alphaproteobacteria;o__Rhodobacterales":0.0,"k__Bacteria;p__Proteobacteria;c__Alphaproteobacteria;o__Rhodospirillales":0.0,"k__Bacteria;p__Proteobacteria;c__Alphaproteobacteria;o__Sphingomonadales":0.0,"k__Bacteria;p__Proteobacteria;c__Betaproteobacteria;__":0.0,"k__Bacteria;p__Proteobacteria;c__Betaproteobacteria;o__Burkholderiales":0.0,"k__Bacteria;p__Proteobacteria;c__Betaproteobacteria;o__Thiobacterales":0.0,"k__Bacteria;p__Proteobacteria;c__Deltaproteobacteria;__":0.0,"k__Bacteria;p__Proteobacteria;c__Deltaproteobacteria;o__":0.0,"k__Bacteria;p__Proteobacteria;c__Deltaproteobacteria;o__Syntrophobacterales":0.0,"k__Bacteria;p__Proteobacteria;c__Epsilonproteobacteria;o__Campylobacterales":0.0,"k__Bacteria;p__Proteobacteria;c__Gammaproteobacteria;__":0.0,"k__Bacteria;p__Proteobacteria;c__Gammaproteobacteria;o__Aeromonadales":0.0,"k__Bacteria;p__Proteobacteria;c__Gammaproteobacteria;o__Pseudomonadales":0.0,"k__Bacteria;p__Proteobacteria;c__Gammaproteobacteria;o__Xanthomonadales":0.0,"k__Bacteria;p__SAR406;c__AB16;o__noFP_H7":0.0,"k__Bacteria;p__SR1;c__;o__":114.0,"k__Bacteria;p__Spirochaetes;c__MVP-15;o__PL-11B10":0.0,"k__Bacteria;p__Spirochaetes;c__Spirochaetes;o__Sphaerochaetales":0.0,"k__Bacteria;p__Spirochaetes;c__Spirochaetes;o__Spirochaetales":20.0,"k__Bacteria;p__Spirochaetes;c__[Leptospirae];o__[Leptospirales]":0.0,"k__Bacteria;p__Synergistetes;c__Synergistia;o__Synergistales":83.0,"k__Bacteria;p__TA06;c__;o__":0.0,"k__Bacteria;p__TM7;c__TM7-1;o__":0.0,"k__Bacteria;p__TM7;c__TM7-3;__":0.0,"k__Bacteria;p__TM7;c__TM7-3;o__":0.0,"k__Bacteria;p__TM7;c__TM7-3;o__CW040":0.0,"k__Bacteria;p__TM7;c__TM7-3;o__I025":0.0,"k__Bacteria;p__Tenericutes;c__Mollicutes;o__":0.0,"k__Bacteria;p__Tenericutes;c__Mollicutes;o__Acholeplasmatales":23.0,"k__Bacteria;p__Tenericutes;c__Mollicutes;o__RF39":0.0,"k__Bacteria;p__Tenericutes;c__RF3;o__ML615J-28":60.0,"k__Bacteria;p__Thermotogae;c__Thermotogae;o__Thermotogales":0.0,"k__Bacteria;p__Verrucomicrobia;c__Verruco-5;o__LD1-PB3":0.0,"k__Bacteria;p__Verrucomicrobia;c__[Pedosphaerae];o__[Pedosphaerales]":0.0,"k__Bacteria;p__WPS-2;c__;o__":0.0,"k__Bacteria;p__WS6;c__SC72;o__A-2AF":0.0,"k__Bacteria;p__WS6;c__SC72;o__WCHB1-15":0.0,"k__Bacteria;p__WWE1;c__[Cloacamonae];o__[Cloacamonales]":1051.0,"plant type":"Biogas","plant no.":"#02"},{"index":"04_U341F-U806R-NW3-4","k__Archaea;p__Crenarchaeota;c__MCG;o__pGrfC26":0.0,"k__Archaea;p__Euryarchaeota;c__Methanobacteria;o__Methanobacteriales":66.0,"k__Archaea;p__Euryarchaeota;c__Methanomicrobia;o__Methanomicrobiales":0.0,"k__Archaea;p__Euryarchaeota;c__Methanomicrobia;o__Methanosarcinales":37.0,"k__Archaea;p__Euryarchaeota;c__Thermoplasmata;o__E2":0.0,"k__Archaea;p__[Parvarchaeota];c__[Parvarchaea];o__WCHD3-30":0.0,"k__Bacteria;__;__;__":118.0,"k__Bacteria;p__;c__;o__":372.0,"k__Bacteria;p__Acidobacteria;c__BPC102;o__MVS-40":0.0,"k__Bacteria;p__Acidobacteria;c__Solibacteres;o__Solibacterales":0.0,"k__Bacteria;p__Acidobacteria;c__[Chloracidobacteria];o__RB41":0.0,"k__Bacteria;p__Actinobacteria;c__;o__":0.0,"k__Bacteria;p__Actinobacteria;c__Acidimicrobiia;o__Acidimicrobiales":0.0,"k__Bacteria;p__Actinobacteria;c__Actinobacteria;o__Actinomycetales":0.0,"k__Bacteria;p__Actinobacteria;c__Actinobacteria;o__Bifidobacteriales":102.0,"k__Bacteria;p__Actinobacteria;c__Actinobacteria;o__WCHB1-81":0.0,"k__Bacteria;p__Actinobacteria;c__Coriobacteriia;o__Coriobacteriales":13.0,"k__Bacteria;p__Armatimonadetes;c__SJA-176;o__GAB-B06":0.0,"k__Bacteria;p__Bacteroidetes;__;__":1788.0,"k__Bacteria;p__Bacteroidetes;c__Bacteroidia;o__Bacteroidales":2257.0,"k__Bacteria;p__Bacteroidetes;c__Flavobacteriia;o__Flavobacteriales":0.0,"k__Bacteria;p__Bacteroidetes;c__Sphingobacteriia;o__Sphingobacteriales":0.0,"k__Bacteria;p__Bacteroidetes;c__[Saprospirae];o__[Saprospirales]":0.0,"k__Bacteria;p__Caldiserica;c__OP5;o__WCHB1-02":0.0,"k__Bacteria;p__Caldiserica;c__TTA-B1;o__":0.0,"k__Bacteria;p__Chlorobi;c__Ignavibacteria;o__Ignavibacteriales":0.0,"k__Bacteria;p__Chlorobi;c__SJA-28;o__":0.0,"k__Bacteria;p__Chloroflexi;c__;o__":0.0,"k__Bacteria;p__Chloroflexi;c__Anaerolineae;o__Anaerolineales":0.0,"k__Bacteria;p__Chloroflexi;c__Anaerolineae;o__Caldilineales":0.0,"k__Bacteria;p__Chloroflexi;c__Anaerolineae;o__OPB11":0.0,"k__Bacteria;p__Chloroflexi;c__Anaerolineae;o__SBR1031":0.0,"k__Bacteria;p__Chloroflexi;c__Anaerolineae;o__SHA-20":0.0,"k__Bacteria;p__Chloroflexi;c__Dehalococcoidetes;o__Dehalococcoidales":0.0,"k__Bacteria;p__Chloroflexi;c__Ellin6529;o__":0.0,"k__Bacteria;p__Chloroflexi;c__TK17;o__mle1-48":0.0,"k__Bacteria;p__Chloroflexi;c__Thermomicrobia;o__JG30-KF-CM45":0.0,"k__Bacteria;p__Cyanobacteria;c__Chloroplast;o__Streptophyta":0.0,"k__Bacteria;p__EM3;c__;o__":0.0,"k__Bacteria;p__Fibrobacteres;c__Fibrobacteria;o__Fibrobacterales":10.0,"k__Bacteria;p__Fibrobacteres;c__TG3;o__TG3-1":0.0,"k__Bacteria;p__Firmicutes;c__Bacilli;__":23.0,"k__Bacteria;p__Firmicutes;c__Bacilli;o__Bacillales":59.0,"k__Bacteria;p__Firmicutes;c__Bacilli;o__Haloplasmatales":0.0,"k__Bacteria;p__Firmicutes;c__Bacilli;o__Lactobacillales":1067.0,"k__Bacteria;p__Firmicutes;c__Bacilli;o__Turicibacterales":0.0,"k__Bacteria;p__Firmicutes;c__Clostridia;__":31.0,"k__Bacteria;p__Firmicutes;c__Clostridia;o__":0.0,"k__Bacteria;p__Firmicutes;c__Clostridia;o__BSA2B-08":0.0,"k__Bacteria;p__Firmicutes;c__Clostridia;o__Clostridiales":3603.0,"k__Bacteria;p__Firmicutes;c__Clostridia;o__Halanaerobiales":16.0,"k__Bacteria;p__Firmicutes;c__Clostridia;o__MBA08":278.0,"k__Bacteria;p__Firmicutes;c__Clostridia;o__Natranaerobiales":95.0,"k__Bacteria;p__Firmicutes;c__Clostridia;o__OPB54":8.0,"k__Bacteria;p__Firmicutes;c__Clostridia;o__SHA-98":224.0,"k__Bacteria;p__Firmicutes;c__Clostridia;o__Thermoanaerobacterales":348.0,"k__Bacteria;p__Firmicutes;c__Erysipelotrichi;o__Erysipelotrichales":384.0,"k__Bacteria;p__Firmicutes;c__OPB54;o__":47.0,"k__Bacteria;p__NKB19;c__noFP_H4;o__":0.0,"k__Bacteria;p__OD1;c__;o__":0.0,"k__Bacteria;p__OD1;c__ABY1;o__":0.0,"k__Bacteria;p__OP1;c__OPB14;o__":0.0,"k__Bacteria;p__OP8;c__OP8_1;o__OPB95":0.0,"k__Bacteria;p__OP9;c__JS1;o__BA021":0.0,"k__Bacteria;p__OP9;c__OPB46;o__OPB72":0.0,"k__Bacteria;p__OP9;c__OPB46;o__SHA-1":0.0,"k__Bacteria;p__Proteobacteria;c__Alphaproteobacteria;__":0.0,"k__Bacteria;p__Proteobacteria;c__Alphaproteobacteria;o__Rhizobiales":0.0,"k__Bacteria;p__Proteobacteria;c__Alphaproteobacteria;o__Rhodobacterales":0.0,"k__Bacteria;p__Proteobacteria;c__Alphaproteobacteria;o__Rhodospirillales":0.0,"k__Bacteria;p__Proteobacteria;c__Alphaproteobacteria;o__Sphingomonadales":0.0,"k__Bacteria;p__Proteobacteria;c__Betaproteobacteria;__":0.0,"k__Bacteria;p__Proteobacteria;c__Betaproteobacteria;o__Burkholderiales":9.0,"k__Bacteria;p__Proteobacteria;c__Betaproteobacteria;o__Thiobacterales":0.0,"k__Bacteria;p__Proteobacteria;c__Deltaproteobacteria;__":0.0,"k__Bacteria;p__Proteobacteria;c__Deltaproteobacteria;o__":0.0,"k__Bacteria;p__Proteobacteria;c__Deltaproteobacteria;o__Syntrophobacterales":0.0,"k__Bacteria;p__Proteobacteria;c__Epsilonproteobacteria;o__Campylobacterales":0.0,"k__Bacteria;p__Proteobacteria;c__Gammaproteobacteria;__":8.0,"k__Bacteria;p__Proteobacteria;c__Gammaproteobacteria;o__Aeromonadales":15.0,"k__Bacteria;p__Proteobacteria;c__Gammaproteobacteria;o__Pseudomonadales":12.0,"k__Bacteria;p__Proteobacteria;c__Gammaproteobacteria;o__Xanthomonadales":0.0,"k__Bacteria;p__SAR406;c__AB16;o__noFP_H7":0.0,"k__Bacteria;p__SR1;c__;o__":61.0,"k__Bacteria;p__Spirochaetes;c__MVP-15;o__PL-11B10":0.0,"k__Bacteria;p__Spirochaetes;c__Spirochaetes;o__Sphaerochaetales":0.0,"k__Bacteria;p__Spirochaetes;c__Spirochaetes;o__Spirochaetales":0.0,"k__Bacteria;p__Spirochaetes;c__[Leptospirae];o__[Leptospirales]":0.0,"k__Bacteria;p__Synergistetes;c__Synergistia;o__Synergistales":63.0,"k__Bacteria;p__TA06;c__;o__":0.0,"k__Bacteria;p__TM7;c__TM7-1;o__":0.0,"k__Bacteria;p__TM7;c__TM7-3;__":0.0,"k__Bacteria;p__TM7;c__TM7-3;o__":0.0,"k__Bacteria;p__TM7;c__TM7-3;o__CW040":0.0,"k__Bacteria;p__TM7;c__TM7-3;o__I025":0.0,"k__Bacteria;p__Tenericutes;c__Mollicutes;o__":18.0,"k__Bacteria;p__Tenericutes;c__Mollicutes;o__Acholeplasmatales":88.0,"k__Bacteria;p__Tenericutes;c__Mollicutes;o__RF39":6.0,"k__Bacteria;p__Tenericutes;c__RF3;o__ML615J-28":192.0,"k__Bacteria;p__Thermotogae;c__Thermotogae;o__Thermotogales":173.0,"k__Bacteria;p__Verrucomicrobia;c__Verruco-5;o__LD1-PB3":0.0,"k__Bacteria;p__Verrucomicrobia;c__[Pedosphaerae];o__[Pedosphaerales]":0.0,"k__Bacteria;p__WPS-2;c__;o__":0.0,"k__Bacteria;p__WS6;c__SC72;o__A-2AF":0.0,"k__Bacteria;p__WS6;c__SC72;o__WCHB1-15":0.0,"k__Bacteria;p__WWE1;c__[Cloacamonae];o__[Cloacamonales]":104.0,"plant type":"Biogas","plant no.":"#04"},{"index":"05_U341F-U806R-NW3-5","k__Archaea;p__Crenarchaeota;c__MCG;o__pGrfC26":0.0,"k__Archaea;p__Euryarchaeota;c__Methanobacteria;o__Methanobacteriales":0.0,"k__Archaea;p__Euryarchaeota;c__Methanomicrobia;o__Methanomicrobiales":0.0,"k__Archaea;p__Euryarchaeota;c__Methanomicrobia;o__Methanosarcinales":0.0,"k__Archaea;p__Euryarchaeota;c__Thermoplasmata;o__E2":0.0,"k__Archaea;p__[Parvarchaeota];c__[Parvarchaea];o__WCHD3-30":0.0,"k__Bacteria;__;__;__":52.0,"k__Bacteria;p__;c__;o__":28.0,"k__Bacteria;p__Acidobacteria;c__BPC102;o__MVS-40":0.0,"k__Bacteria;p__Acidobacteria;c__Solibacteres;o__Solibacterales":0.0,"k__Bacteria;p__Acidobacteria;c__[Chloracidobacteria];o__RB41":0.0,"k__Bacteria;p__Actinobacteria;c__;o__":0.0,"k__Bacteria;p__Actinobacteria;c__Acidimicrobiia;o__Acidimicrobiales":0.0,"k__Bacteria;p__Actinobacteria;c__Actinobacteria;o__Actinomycetales":0.0,"k__Bacteria;p__Actinobacteria;c__Actinobacteria;o__Bifidobacteriales":0.0,"k__Bacteria;p__Actinobacteria;c__Actinobacteria;o__WCHB1-81":0.0,"k__Bacteria;p__Actinobacteria;c__Coriobacteriia;o__Coriobacteriales":0.0,"k__Bacteria;p__Armatimonadetes;c__SJA-176;o__GAB-B06":0.0,"k__Bacteria;p__Bacteroidetes;__;__":181.0,"k__Bacteria;p__Bacteroidetes;c__Bacteroidia;o__Bacteroidales":233.0,"k__Bacteria;p__Bacteroidetes;c__Flavobacteriia;o__Flavobacteriales":0.0,"k__Bacteria;p__Bacteroidetes;c__Sphingobacteriia;o__Sphingobacteriales":0.0,"k__Bacteria;p__Bacteroidetes;c__[Saprospirae];o__[Saprospirales]":0.0,"k__Bacteria;p__Caldiserica;c__OP5;o__WCHB1-02":0.0,"k__Bacteria;p__Caldiserica;c__TTA-B1;o__":0.0,"k__Bacteria;p__Chlorobi;c__Ignavibacteria;o__Ignavibacteriales":0.0,"k__Bacteria;p__Chlorobi;c__SJA-28;o__":0.0,"k__Bacteria;p__Chloroflexi;c__;o__":0.0,"k__Bacteria;p__Chloroflexi;c__Anaerolineae;o__Anaerolineales":0.0,"k__Bacteria;p__Chloroflexi;c__Anaerolineae;o__Caldilineales":0.0,"k__Bacteria;p__Chloroflexi;c__Anaerolineae;o__OPB11":0.0,"k__Bacteria;p__Chloroflexi;c__Anaerolineae;o__SBR1031":0.0,"k__Bacteria;p__Chloroflexi;c__Anaerolineae;o__SHA-20":0.0,"k__Bacteria;p__Chloroflexi;c__Dehalococcoidetes;o__Dehalococcoidales":0.0,"k__Bacteria;p__Chloroflexi;c__Ellin6529;o__":0.0,"k__Bacteria;p__Chloroflexi;c__TK17;o__mle1-48":0.0,"k__Bacteria;p__Chloroflexi;c__Thermomicrobia;o__JG30-KF-CM45":0.0,"k__Bacteria;p__Cyanobacteria;c__Chloroplast;o__Streptophyta":0.0,"k__Bacteria;p__EM3;c__;o__":0.0,"k__Bacteria;p__Fibrobacteres;c__Fibrobacteria;o__Fibrobacterales":0.0,"k__Bacteria;p__Fibrobacteres;c__TG3;o__TG3-1":0.0,"k__Bacteria;p__Firmicutes;c__Bacilli;__":0.0,"k__Bacteria;p__Firmicutes;c__Bacilli;o__Bacillales":0.0,"k__Bacteria;p__Firmicutes;c__Bacilli;o__Haloplasmatales":0.0,"k__Bacteria;p__Firmicutes;c__Bacilli;o__Lactobacillales":56.0,"k__Bacteria;p__Firmicutes;c__Bacilli;o__Turicibacterales":0.0,"k__Bacteria;p__Firmicutes;c__Clostridia;__":209.0,"k__Bacteria;p__Firmicutes;c__Clostridia;o__":0.0,"k__Bacteria;p__Firmicutes;c__Clostridia;o__BSA2B-08":0.0,"k__Bacteria;p__Firmicutes;c__Clostridia;o__Clostridiales":1684.0,"k__Bacteria;p__Firmicutes;c__Clostridia;o__Halanaerobiales":145.0,"k__Bacteria;p__Firmicutes;c__Clostridia;o__MBA08":2230.0,"k__Bacteria;p__Firmicutes;c__Clostridia;o__Natranaerobiales":0.0,"k__Bacteria;p__Firmicutes;c__Clostridia;o__OPB54":20.0,"k__Bacteria;p__Firmicutes;c__Clostridia;o__SHA-98":231.0,"k__Bacteria;p__Firmicutes;c__Clostridia;o__Thermoanaerobacterales":124.0,"k__Bacteria;p__Firmicutes;c__Erysipelotrichi;o__Erysipelotrichales":195.0,"k__Bacteria;p__Firmicutes;c__OPB54;o__":34.0,"k__Bacteria;p__NKB19;c__noFP_H4;o__":0.0,"k__Bacteria;p__OD1;c__;o__":0.0,"k__Bacteria;p__OD1;c__ABY1;o__":0.0,"k__Bacteria;p__OP1;c__OPB14;o__":0.0,"k__Bacteria;p__OP8;c__OP8_1;o__OPB95":0.0,"k__Bacteria;p__OP9;c__JS1;o__BA021":0.0,"k__Bacteria;p__OP9;c__OPB46;o__OPB72":9.0,"k__Bacteria;p__OP9;c__OPB46;o__SHA-1":0.0,"k__Bacteria;p__Proteobacteria;c__Alphaproteobacteria;__":0.0,"k__Bacteria;p__Proteobacteria;c__Alphaproteobacteria;o__Rhizobiales":0.0,"k__Bacteria;p__Proteobacteria;c__Alphaproteobacteria;o__Rhodobacterales":0.0,"k__Bacteria;p__Proteobacteria;c__Alphaproteobacteria;o__Rhodospirillales":0.0,"k__Bacteria;p__Proteobacteria;c__Alphaproteobacteria;o__Sphingomonadales":0.0,"k__Bacteria;p__Proteobacteria;c__Betaproteobacteria;__":0.0,"k__Bacteria;p__Proteobacteria;c__Betaproteobacteria;o__Burkholderiales":0.0,"k__Bacteria;p__Proteobacteria;c__Betaproteobacteria;o__Thiobacterales":0.0,"k__Bacteria;p__Proteobacteria;c__Deltaproteobacteria;__":0.0,"k__Bacteria;p__Proteobacteria;c__Deltaproteobacteria;o__":0.0,"k__Bacteria;p__Proteobacteria;c__Deltaproteobacteria;o__Syntrophobacterales":0.0,"k__Bacteria;p__Proteobacteria;c__Epsilonproteobacteria;o__Campylobacterales":0.0,"k__Bacteria;p__Proteobacteria;c__Gammaproteobacteria;__":0.0,"k__Bacteria;p__Proteobacteria;c__Gammaproteobacteria;o__Aeromonadales":0.0,"k__Bacteria;p__Proteobacteria;c__Gammaproteobacteria;o__Pseudomonadales":0.0,"k__Bacteria;p__Proteobacteria;c__Gammaproteobacteria;o__Xanthomonadales":0.0,"k__Bacteria;p__SAR406;c__AB16;o__noFP_H7":0.0,"k__Bacteria;p__SR1;c__;o__":19.0,"k__Bacteria;p__Spirochaetes;c__MVP-15;o__PL-11B10":0.0,"k__Bacteria;p__Spirochaetes;c__Spirochaetes;o__Sphaerochaetales":0.0,"k__Bacteria;p__Spirochaetes;c__Spirochaetes;o__Spirochaetales":60.0,"k__Bacteria;p__Spirochaetes;c__[Leptospirae];o__[Leptospirales]":0.0,"k__Bacteria;p__Synergistetes;c__Synergistia;o__Synergistales":0.0,"k__Bacteria;p__TA06;c__;o__":0.0,"k__Bacteria;p__TM7;c__TM7-1;o__":0.0,"k__Bacteria;p__TM7;c__TM7-3;__":0.0,"k__Bacteria;p__TM7;c__TM7-3;o__":0.0,"k__Bacteria;p__TM7;c__TM7-3;o__CW040":0.0,"k__Bacteria;p__TM7;c__TM7-3;o__I025":0.0,"k__Bacteria;p__Tenericutes;c__Mollicutes;o__":0.0,"k__Bacteria;p__Tenericutes;c__Mollicutes;o__Acholeplasmatales":86.0,"k__Bacteria;p__Tenericutes;c__Mollicutes;o__RF39":0.0,"k__Bacteria;p__Tenericutes;c__RF3;o__ML615J-28":52.0,"k__Bacteria;p__Thermotogae;c__Thermotogae;o__Thermotogales":0.0,"k__Bacteria;p__Verrucomicrobia;c__Verruco-5;o__LD1-PB3":0.0,"k__Bacteria;p__Verrucomicrobia;c__[Pedosphaerae];o__[Pedosphaerales]":0.0,"k__Bacteria;p__WPS-2;c__;o__":0.0,"k__Bacteria;p__WS6;c__SC72;o__A-2AF":0.0,"k__Bacteria;p__WS6;c__SC72;o__WCHB1-15":0.0,"k__Bacteria;p__WWE1;c__[Cloacamonae];o__[Cloacamonales]":59.0,"plant type":"Biogas","plant no.":"#05"},{"index":"06_U341F-U806R-NW3-6","k__Archaea;p__Crenarchaeota;c__MCG;o__pGrfC26":13.0,"k__Archaea;p__Euryarchaeota;c__Methanobacteria;o__Methanobacteriales":8.0,"k__Archaea;p__Euryarchaeota;c__Methanomicrobia;o__Methanomicrobiales":0.0,"k__Archaea;p__Euryarchaeota;c__Methanomicrobia;o__Methanosarcinales":1081.0,"k__Archaea;p__Euryarchaeota;c__Thermoplasmata;o__E2":0.0,"k__Archaea;p__[Parvarchaeota];c__[Parvarchaea];o__WCHD3-30":0.0,"k__Bacteria;__;__;__":145.0,"k__Bacteria;p__;c__;o__":310.0,"k__Bacteria;p__Acidobacteria;c__BPC102;o__MVS-40":17.0,"k__Bacteria;p__Acidobacteria;c__Solibacteres;o__Solibacterales":0.0,"k__Bacteria;p__Acidobacteria;c__[Chloracidobacteria];o__RB41":0.0,"k__Bacteria;p__Actinobacteria;c__;o__":0.0,"k__Bacteria;p__Actinobacteria;c__Acidimicrobiia;o__Acidimicrobiales":0.0,"k__Bacteria;p__Actinobacteria;c__Actinobacteria;o__Actinomycetales":24.0,"k__Bacteria;p__Actinobacteria;c__Actinobacteria;o__Bifidobacteriales":0.0,"k__Bacteria;p__Actinobacteria;c__Actinobacteria;o__WCHB1-81":0.0,"k__Bacteria;p__Actinobacteria;c__Coriobacteriia;o__Coriobacteriales":37.0,"k__Bacteria;p__Armatimonadetes;c__SJA-176;o__GAB-B06":0.0,"k__Bacteria;p__Bacteroidetes;__;__":10.0,"k__Bacteria;p__Bacteroidetes;c__Bacteroidia;o__Bacteroidales":2421.0,"k__Bacteria;p__Bacteroidetes;c__Flavobacteriia;o__Flavobacteriales":0.0,"k__Bacteria;p__Bacteroidetes;c__Sphingobacteriia;o__Sphingobacteriales":0.0,"k__Bacteria;p__Bacteroidetes;c__[Saprospirae];o__[Saprospirales]":0.0,"k__Bacteria;p__Caldiserica;c__OP5;o__WCHB1-02":0.0,"k__Bacteria;p__Caldiserica;c__TTA-B1;o__":0.0,"k__Bacteria;p__Chlorobi;c__Ignavibacteria;o__Ignavibacteriales":0.0,"k__Bacteria;p__Chlorobi;c__SJA-28;o__":0.0,"k__Bacteria;p__Chloroflexi;c__;o__":0.0,"k__Bacteria;p__Chloroflexi;c__Anaerolineae;o__Anaerolineales":0.0,"k__Bacteria;p__Chloroflexi;c__Anaerolineae;o__Caldilineales":0.0,"k__Bacteria;p__Chloroflexi;c__Anaerolineae;o__OPB11":0.0,"k__Bacteria;p__Chloroflexi;c__Anaerolineae;o__SBR1031":0.0,"k__Bacteria;p__Chloroflexi;c__Anaerolineae;o__SHA-20":0.0,"k__Bacteria;p__Chloroflexi;c__Dehalococcoidetes;o__Dehalococcoidales":8.0,"k__Bacteria;p__Chloroflexi;c__Ellin6529;o__":0.0,"k__Bacteria;p__Chloroflexi;c__TK17;o__mle1-48":0.0,"k__Bacteria;p__Chloroflexi;c__Thermomicrobia;o__JG30-KF-CM45":0.0,"k__Bacteria;p__Cyanobacteria;c__Chloroplast;o__Streptophyta":0.0,"k__Bacteria;p__EM3;c__;o__":0.0,"k__Bacteria;p__Fibrobacteres;c__Fibrobacteria;o__Fibrobacterales":7.0,"k__Bacteria;p__Fibrobacteres;c__TG3;o__TG3-1":50.0,"k__Bacteria;p__Firmicutes;c__Bacilli;__":0.0,"k__Bacteria;p__Firmicutes;c__Bacilli;o__Bacillales":0.0,"k__Bacteria;p__Firmicutes;c__Bacilli;o__Haloplasmatales":0.0,"k__Bacteria;p__Firmicutes;c__Bacilli;o__Lactobacillales":27.0,"k__Bacteria;p__Firmicutes;c__Bacilli;o__Turicibacterales":13.0,"k__Bacteria;p__Firmicutes;c__Clostridia;__":4.0,"k__Bacteria;p__Firmicutes;c__Clostridia;o__":0.0,"k__Bacteria;p__Firmicutes;c__Clostridia;o__BSA2B-08":0.0,"k__Bacteria;p__Firmicutes;c__Clostridia;o__Clostridiales":4558.0,"k__Bacteria;p__Firmicutes;c__Clostridia;o__Halanaerobiales":0.0,"k__Bacteria;p__Firmicutes;c__Clostridia;o__MBA08":1219.0,"k__Bacteria;p__Firmicutes;c__Clostridia;o__Natranaerobiales":8.0,"k__Bacteria;p__Firmicutes;c__Clostridia;o__OPB54":9.0,"k__Bacteria;p__Firmicutes;c__Clostridia;o__SHA-98":44.0,"k__Bacteria;p__Firmicutes;c__Clostridia;o__Thermoanaerobacterales":17.0,"k__Bacteria;p__Firmicutes;c__Erysipelotrichi;o__Erysipelotrichales":29.0,"k__Bacteria;p__Firmicutes;c__OPB54;o__":3.0,"k__Bacteria;p__NKB19;c__noFP_H4;o__":0.0,"k__Bacteria;p__OD1;c__;o__":0.0,"k__Bacteria;p__OD1;c__ABY1;o__":12.0,"k__Bacteria;p__OP1;c__OPB14;o__":0.0,"k__Bacteria;p__OP8;c__OP8_1;o__OPB95":0.0,"k__Bacteria;p__OP9;c__JS1;o__BA021":0.0,"k__Bacteria;p__OP9;c__OPB46;o__OPB72":0.0,"k__Bacteria;p__OP9;c__OPB46;o__SHA-1":21.0,"k__Bacteria;p__Proteobacteria;c__Alphaproteobacteria;__":0.0,"k__Bacteria;p__Proteobacteria;c__Alphaproteobacteria;o__Rhizobiales":0.0,"k__Bacteria;p__Proteobacteria;c__Alphaproteobacteria;o__Rhodobacterales":0.0,"k__Bacteria;p__Proteobacteria;c__Alphaproteobacteria;o__Rhodospirillales":0.0,"k__Bacteria;p__Proteobacteria;c__Alphaproteobacteria;o__Sphingomonadales":0.0,"k__Bacteria;p__Proteobacteria;c__Betaproteobacteria;__":0.0,"k__Bacteria;p__Proteobacteria;c__Betaproteobacteria;o__Burkholderiales":0.0,"k__Bacteria;p__Proteobacteria;c__Betaproteobacteria;o__Thiobacterales":0.0,"k__Bacteria;p__Proteobacteria;c__Deltaproteobacteria;__":0.0,"k__Bacteria;p__Proteobacteria;c__Deltaproteobacteria;o__":0.0,"k__Bacteria;p__Proteobacteria;c__Deltaproteobacteria;o__Syntrophobacterales":0.0,"k__Bacteria;p__Proteobacteria;c__Epsilonproteobacteria;o__Campylobacterales":15.0,"k__Bacteria;p__Proteobacteria;c__Gammaproteobacteria;__":0.0,"k__Bacteria;p__Proteobacteria;c__Gammaproteobacteria;o__Aeromonadales":0.0,"k__Bacteria;p__Proteobacteria;c__Gammaproteobacteria;o__Pseudomonadales":0.0,"k__Bacteria;p__Proteobacteria;c__Gammaproteobacteria;o__Xanthomonadales":0.0,"k__Bacteria;p__SAR406;c__AB16;o__noFP_H7":0.0,"k__Bacteria;p__SR1;c__;o__":277.0,"k__Bacteria;p__Spirochaetes;c__MVP-15;o__PL-11B10":0.0,"k__Bacteria;p__Spirochaetes;c__Spirochaetes;o__Sphaerochaetales":0.0,"k__Bacteria;p__Spirochaetes;c__Spirochaetes;o__Spirochaetales":63.0,"k__Bacteria;p__Spirochaetes;c__[Leptospirae];o__[Leptospirales]":0.0,"k__Bacteria;p__Synergistetes;c__Synergistia;o__Synergistales":104.0,"k__Bacteria;p__TA06;c__;o__":0.0,"k__Bacteria;p__TM7;c__TM7-1;o__":0.0,"k__Bacteria;p__TM7;c__TM7-3;__":0.0,"k__Bacteria;p__TM7;c__TM7-3;o__":0.0,"k__Bacteria;p__TM7;c__TM7-3;o__CW040":8.0,"k__Bacteria;p__TM7;c__TM7-3;o__I025":0.0,"k__Bacteria;p__Tenericutes;c__Mollicutes;o__":9.0,"k__Bacteria;p__Tenericutes;c__Mollicutes;o__Acholeplasmatales":136.0,"k__Bacteria;p__Tenericutes;c__Mollicutes;o__RF39":0.0,"k__Bacteria;p__Tenericutes;c__RF3;o__ML615J-28":212.0,"k__Bacteria;p__Thermotogae;c__Thermotogae;o__Thermotogales":0.0,"k__Bacteria;p__Verrucomicrobia;c__Verruco-5;o__LD1-PB3":14.0,"k__Bacteria;p__Verrucomicrobia;c__[Pedosphaerae];o__[Pedosphaerales]":13.0,"k__Bacteria;p__WPS-2;c__;o__":11.0,"k__Bacteria;p__WS6;c__SC72;o__A-2AF":0.0,"k__Bacteria;p__WS6;c__SC72;o__WCHB1-15":6.0,"k__Bacteria;p__WWE1;c__[Cloacamonae];o__[Cloacamonales]":861.0,"plant type":"Biogas","plant no.":"#06"},{"index":"07_U341F-U806R-NW3-8","k__Archaea;p__Crenarchaeota;c__MCG;o__pGrfC26":0.0,"k__Archaea;p__Euryarchaeota;c__Methanobacteria;o__Methanobacteriales":0.0,"k__Archaea;p__Euryarchaeota;c__Methanomicrobia;o__Methanomicrobiales":0.0,"k__Archaea;p__Euryarchaeota;c__Methanomicrobia;o__Methanosarcinales":100.0,"k__Archaea;p__Euryarchaeota;c__Thermoplasmata;o__E2":0.0,"k__Archaea;p__[Parvarchaeota];c__[Parvarchaea];o__WCHD3-30":0.0,"k__Bacteria;__;__;__":19.0,"k__Bacteria;p__;c__;o__":91.0,"k__Bacteria;p__Acidobacteria;c__BPC102;o__MVS-40":0.0,"k__Bacteria;p__Acidobacteria;c__Solibacteres;o__Solibacterales":0.0,"k__Bacteria;p__Acidobacteria;c__[Chloracidobacteria];o__RB41":0.0,"k__Bacteria;p__Actinobacteria;c__;o__":0.0,"k__Bacteria;p__Actinobacteria;c__Acidimicrobiia;o__Acidimicrobiales":0.0,"k__Bacteria;p__Actinobacteria;c__Actinobacteria;o__Actinomycetales":0.0,"k__Bacteria;p__Actinobacteria;c__Actinobacteria;o__Bifidobacteriales":0.0,"k__Bacteria;p__Actinobacteria;c__Actinobacteria;o__WCHB1-81":0.0,"k__Bacteria;p__Actinobacteria;c__Coriobacteriia;o__Coriobacteriales":0.0,"k__Bacteria;p__Armatimonadetes;c__SJA-176;o__GAB-B06":0.0,"k__Bacteria;p__Bacteroidetes;__;__":851.0,"k__Bacteria;p__Bacteroidetes;c__Bacteroidia;o__Bacteroidales":1774.0,"k__Bacteria;p__Bacteroidetes;c__Flavobacteriia;o__Flavobacteriales":0.0,"k__Bacteria;p__Bacteroidetes;c__Sphingobacteriia;o__Sphingobacteriales":0.0,"k__Bacteria;p__Bacteroidetes;c__[Saprospirae];o__[Saprospirales]":0.0,"k__Bacteria;p__Caldiserica;c__OP5;o__WCHB1-02":0.0,"k__Bacteria;p__Caldiserica;c__TTA-B1;o__":0.0,"k__Bacteria;p__Chlorobi;c__Ignavibacteria;o__Ignavibacteriales":0.0,"k__Bacteria;p__Chlorobi;c__SJA-28;o__":0.0,"k__Bacteria;p__Chloroflexi;c__;o__":0.0,"k__Bacteria;p__Chloroflexi;c__Anaerolineae;o__Anaerolineales":0.0,"k__Bacteria;p__Chloroflexi;c__Anaerolineae;o__Caldilineales":0.0,"k__Bacteria;p__Chloroflexi;c__Anaerolineae;o__OPB11":0.0,"k__Bacteria;p__Chloroflexi;c__Anaerolineae;o__SBR1031":0.0,"k__Bacteria;p__Chloroflexi;c__Anaerolineae;o__SHA-20":0.0,"k__Bacteria;p__Chloroflexi;c__Dehalococcoidetes;o__Dehalococcoidales":0.0,"k__Bacteria;p__Chloroflexi;c__Ellin6529;o__":0.0,"k__Bacteria;p__Chloroflexi;c__TK17;o__mle1-48":0.0,"k__Bacteria;p__Chloroflexi;c__Thermomicrobia;o__JG30-KF-CM45":0.0,"k__Bacteria;p__Cyanobacteria;c__Chloroplast;o__Streptophyta":0.0,"k__Bacteria;p__EM3;c__;o__":0.0,"k__Bacteria;p__Fibrobacteres;c__Fibrobacteria;o__Fibrobacterales":0.0,"k__Bacteria;p__Fibrobacteres;c__TG3;o__TG3-1":0.0,"k__Bacteria;p__Firmicutes;c__Bacilli;__":0.0,"k__Bacteria;p__Firmicutes;c__Bacilli;o__Bacillales":13.0,"k__Bacteria;p__Firmicutes;c__Bacilli;o__Haloplasmatales":0.0,"k__Bacteria;p__Firmicutes;c__Bacilli;o__Lactobacillales":21.0,"k__Bacteria;p__Firmicutes;c__Bacilli;o__Turicibacterales":0.0,"k__Bacteria;p__Firmicutes;c__Clostridia;__":439.0,"k__Bacteria;p__Firmicutes;c__Clostridia;o__":6.0,"k__Bacteria;p__Firmicutes;c__Clostridia;o__BSA2B-08":21.0,"k__Bacteria;p__Firmicutes;c__Clostridia;o__Clostridiales":860.0,"k__Bacteria;p__Firmicutes;c__Clostridia;o__Halanaerobiales":36.0,"k__Bacteria;p__Firmicutes;c__Clostridia;o__MBA08":6191.0,"k__Bacteria;p__Firmicutes;c__Clostridia;o__Natranaerobiales":52.0,"k__Bacteria;p__Firmicutes;c__Clostridia;o__OPB54":17.0,"k__Bacteria;p__Firmicutes;c__Clostridia;o__SHA-98":1212.0,"k__Bacteria;p__Firmicutes;c__Clostridia;o__Thermoanaerobacterales":194.0,"k__Bacteria;p__Firmicutes;c__Erysipelotrichi;o__Erysipelotrichales":0.0,"k__Bacteria;p__Firmicutes;c__OPB54;o__":77.0,"k__Bacteria;p__NKB19;c__noFP_H4;o__":0.0,"k__Bacteria;p__OD1;c__;o__":0.0,"k__Bacteria;p__OD1;c__ABY1;o__":0.0,"k__Bacteria;p__OP1;c__OPB14;o__":0.0,"k__Bacteria;p__OP8;c__OP8_1;o__OPB95":0.0,"k__Bacteria;p__OP9;c__JS1;o__BA021":0.0,"k__Bacteria;p__OP9;c__OPB46;o__OPB72":16.0,"k__Bacteria;p__OP9;c__OPB46;o__SHA-1":0.0,"k__Bacteria;p__Proteobacteria;c__Alphaproteobacteria;__":0.0,"k__Bacteria;p__Proteobacteria;c__Alphaproteobacteria;o__Rhizobiales":0.0,"k__Bacteria;p__Proteobacteria;c__Alphaproteobacteria;o__Rhodobacterales":0.0,"k__Bacteria;p__Proteobacteria;c__Alphaproteobacteria;o__Rhodospirillales":0.0,"k__Bacteria;p__Proteobacteria;c__Alphaproteobacteria;o__Sphingomonadales":0.0,"k__Bacteria;p__Proteobacteria;c__Betaproteobacteria;__":0.0,"k__Bacteria;p__Proteobacteria;c__Betaproteobacteria;o__Burkholderiales":0.0,"k__Bacteria;p__Proteobacteria;c__Betaproteobacteria;o__Thiobacterales":0.0,"k__Bacteria;p__Proteobacteria;c__Deltaproteobacteria;__":0.0,"k__Bacteria;p__Proteobacteria;c__Deltaproteobacteria;o__":0.0,"k__Bacteria;p__Proteobacteria;c__Deltaproteobacteria;o__Syntrophobacterales":0.0,"k__Bacteria;p__Proteobacteria;c__Epsilonproteobacteria;o__Campylobacterales":0.0,"k__Bacteria;p__Proteobacteria;c__Gammaproteobacteria;__":0.0,"k__Bacteria;p__Proteobacteria;c__Gammaproteobacteria;o__Aeromonadales":0.0,"k__Bacteria;p__Proteobacteria;c__Gammaproteobacteria;o__Pseudomonadales":0.0,"k__Bacteria;p__Proteobacteria;c__Gammaproteobacteria;o__Xanthomonadales":0.0,"k__Bacteria;p__SAR406;c__AB16;o__noFP_H7":0.0,"k__Bacteria;p__SR1;c__;o__":0.0,"k__Bacteria;p__Spirochaetes;c__MVP-15;o__PL-11B10":0.0,"k__Bacteria;p__Spirochaetes;c__Spirochaetes;o__Sphaerochaetales":0.0,"k__Bacteria;p__Spirochaetes;c__Spirochaetes;o__Spirochaetales":0.0,"k__Bacteria;p__Spirochaetes;c__[Leptospirae];o__[Leptospirales]":0.0,"k__Bacteria;p__Synergistetes;c__Synergistia;o__Synergistales":94.0,"k__Bacteria;p__TA06;c__;o__":0.0,"k__Bacteria;p__TM7;c__TM7-1;o__":0.0,"k__Bacteria;p__TM7;c__TM7-3;__":0.0,"k__Bacteria;p__TM7;c__TM7-3;o__":0.0,"k__Bacteria;p__TM7;c__TM7-3;o__CW040":0.0,"k__Bacteria;p__TM7;c__TM7-3;o__I025":0.0,"k__Bacteria;p__Tenericutes;c__Mollicutes;o__":0.0,"k__Bacteria;p__Tenericutes;c__Mollicutes;o__Acholeplasmatales":0.0,"k__Bacteria;p__Tenericutes;c__Mollicutes;o__RF39":0.0,"k__Bacteria;p__Tenericutes;c__RF3;o__ML615J-28":70.0,"k__Bacteria;p__Thermotogae;c__Thermotogae;o__Thermotogales":320.0,"k__Bacteria;p__Verrucomicrobia;c__Verruco-5;o__LD1-PB3":0.0,"k__Bacteria;p__Verrucomicrobia;c__[Pedosphaerae];o__[Pedosphaerales]":0.0,"k__Bacteria;p__WPS-2;c__;o__":0.0,"k__Bacteria;p__WS6;c__SC72;o__A-2AF":0.0,"k__Bacteria;p__WS6;c__SC72;o__WCHB1-15":0.0,"k__Bacteria;p__WWE1;c__[Cloacamonae];o__[Cloacamonales]":0.0,"plant type":"Biogas","plant no.":"#07"},{"index":"08_U341F-U806R-NW3-9","k__Archaea;p__Crenarchaeota;c__MCG;o__pGrfC26":0.0,"k__Archaea;p__Euryarchaeota;c__Methanobacteria;o__Methanobacteriales":0.0,"k__Archaea;p__Euryarchaeota;c__Methanomicrobia;o__Methanomicrobiales":0.0,"k__Archaea;p__Euryarchaeota;c__Methanomicrobia;o__Methanosarcinales":0.0,"k__Archaea;p__Euryarchaeota;c__Thermoplasmata;o__E2":0.0,"k__Archaea;p__[Parvarchaeota];c__[Parvarchaea];o__WCHD3-30":0.0,"k__Bacteria;__;__;__":0.0,"k__Bacteria;p__;c__;o__":76.0,"k__Bacteria;p__Acidobacteria;c__BPC102;o__MVS-40":0.0,"k__Bacteria;p__Acidobacteria;c__Solibacteres;o__Solibacterales":0.0,"k__Bacteria;p__Acidobacteria;c__[Chloracidobacteria];o__RB41":0.0,"k__Bacteria;p__Actinobacteria;c__;o__":0.0,"k__Bacteria;p__Actinobacteria;c__Acidimicrobiia;o__Acidimicrobiales":0.0,"k__Bacteria;p__Actinobacteria;c__Actinobacteria;o__Actinomycetales":0.0,"k__Bacteria;p__Actinobacteria;c__Actinobacteria;o__Bifidobacteriales":0.0,"k__Bacteria;p__Actinobacteria;c__Actinobacteria;o__WCHB1-81":0.0,"k__Bacteria;p__Actinobacteria;c__Coriobacteriia;o__Coriobacteriales":0.0,"k__Bacteria;p__Armatimonadetes;c__SJA-176;o__GAB-B06":0.0,"k__Bacteria;p__Bacteroidetes;__;__":298.0,"k__Bacteria;p__Bacteroidetes;c__Bacteroidia;o__Bacteroidales":105.0,"k__Bacteria;p__Bacteroidetes;c__Flavobacteriia;o__Flavobacteriales":0.0,"k__Bacteria;p__Bacteroidetes;c__Sphingobacteriia;o__Sphingobacteriales":0.0,"k__Bacteria;p__Bacteroidetes;c__[Saprospirae];o__[Saprospirales]":0.0,"k__Bacteria;p__Caldiserica;c__OP5;o__WCHB1-02":0.0,"k__Bacteria;p__Caldiserica;c__TTA-B1;o__":0.0,"k__Bacteria;p__Chlorobi;c__Ignavibacteria;o__Ignavibacteriales":0.0,"k__Bacteria;p__Chlorobi;c__SJA-28;o__":0.0,"k__Bacteria;p__Chloroflexi;c__;o__":0.0,"k__Bacteria;p__Chloroflexi;c__Anaerolineae;o__Anaerolineales":0.0,"k__Bacteria;p__Chloroflexi;c__Anaerolineae;o__Caldilineales":0.0,"k__Bacteria;p__Chloroflexi;c__Anaerolineae;o__OPB11":0.0,"k__Bacteria;p__Chloroflexi;c__Anaerolineae;o__SBR1031":0.0,"k__Bacteria;p__Chloroflexi;c__Anaerolineae;o__SHA-20":0.0,"k__Bacteria;p__Chloroflexi;c__Dehalococcoidetes;o__Dehalococcoidales":0.0,"k__Bacteria;p__Chloroflexi;c__Ellin6529;o__":0.0,"k__Bacteria;p__Chloroflexi;c__TK17;o__mle1-48":0.0,"k__Bacteria;p__Chloroflexi;c__Thermomicrobia;o__JG30-KF-CM45":0.0,"k__Bacteria;p__Cyanobacteria;c__Chloroplast;o__Streptophyta":0.0,"k__Bacteria;p__EM3;c__;o__":0.0,"k__Bacteria;p__Fibrobacteres;c__Fibrobacteria;o__Fibrobacterales":0.0,"k__Bacteria;p__Fibrobacteres;c__TG3;o__TG3-1":0.0,"k__Bacteria;p__Firmicutes;c__Bacilli;__":0.0,"k__Bacteria;p__Firmicutes;c__Bacilli;o__Bacillales":0.0,"k__Bacteria;p__Firmicutes;c__Bacilli;o__Haloplasmatales":0.0,"k__Bacteria;p__Firmicutes;c__Bacilli;o__Lactobacillales":0.0,"k__Bacteria;p__Firmicutes;c__Bacilli;o__Turicibacterales":0.0,"k__Bacteria;p__Firmicutes;c__Clostridia;__":147.0,"k__Bacteria;p__Firmicutes;c__Clostridia;o__":13.0,"k__Bacteria;p__Firmicutes;c__Clostridia;o__BSA2B-08":0.0,"k__Bacteria;p__Firmicutes;c__Clostridia;o__Clostridiales":459.0,"k__Bacteria;p__Firmicutes;c__Clostridia;o__Halanaerobiales":65.0,"k__Bacteria;p__Firmicutes;c__Clostridia;o__MBA08":1364.0,"k__Bacteria;p__Firmicutes;c__Clostridia;o__Natranaerobiales":21.0,"k__Bacteria;p__Firmicutes;c__Clostridia;o__OPB54":42.0,"k__Bacteria;p__Firmicutes;c__Clostridia;o__SHA-98":332.0,"k__Bacteria;p__Firmicutes;c__Clostridia;o__Thermoanaerobacterales":78.0,"k__Bacteria;p__Firmicutes;c__Erysipelotrichi;o__Erysipelotrichales":0.0,"k__Bacteria;p__Firmicutes;c__OPB54;o__":21.0,"k__Bacteria;p__NKB19;c__noFP_H4;o__":0.0,"k__Bacteria;p__OD1;c__;o__":0.0,"k__Bacteria;p__OD1;c__ABY1;o__":0.0,"k__Bacteria;p__OP1;c__OPB14;o__":0.0,"k__Bacteria;p__OP8;c__OP8_1;o__OPB95":0.0,"k__Bacteria;p__OP9;c__JS1;o__BA021":0.0,"k__Bacteria;p__OP9;c__OPB46;o__OPB72":0.0,"k__Bacteria;p__OP9;c__OPB46;o__SHA-1":0.0,"k__Bacteria;p__Proteobacteria;c__Alphaproteobacteria;__":0.0,"k__Bacteria;p__Proteobacteria;c__Alphaproteobacteria;o__Rhizobiales":0.0,"k__Bacteria;p__Proteobacteria;c__Alphaproteobacteria;o__Rhodobacterales":0.0,"k__Bacteria;p__Proteobacteria;c__Alphaproteobacteria;o__Rhodospirillales":0.0,"k__Bacteria;p__Proteobacteria;c__Alphaproteobacteria;o__Sphingomonadales":0.0,"k__Bacteria;p__Proteobacteria;c__Betaproteobacteria;__":0.0,"k__Bacteria;p__Proteobacteria;c__Betaproteobacteria;o__Burkholderiales":0.0,"k__Bacteria;p__Proteobacteria;c__Betaproteobacteria;o__Thiobacterales":0.0,"k__Bacteria;p__Proteobacteria;c__Deltaproteobacteria;__":0.0,"k__Bacteria;p__Proteobacteria;c__Deltaproteobacteria;o__":0.0,"k__Bacteria;p__Proteobacteria;c__Deltaproteobacteria;o__Syntrophobacterales":0.0,"k__Bacteria;p__Proteobacteria;c__Epsilonproteobacteria;o__Campylobacterales":0.0,"k__Bacteria;p__Proteobacteria;c__Gammaproteobacteria;__":0.0,"k__Bacteria;p__Proteobacteria;c__Gammaproteobacteria;o__Aeromonadales":0.0,"k__Bacteria;p__Proteobacteria;c__Gammaproteobacteria;o__Pseudomonadales":0.0,"k__Bacteria;p__Proteobacteria;c__Gammaproteobacteria;o__Xanthomonadales":0.0,"k__Bacteria;p__SAR406;c__AB16;o__noFP_H7":0.0,"k__Bacteria;p__SR1;c__;o__":0.0,"k__Bacteria;p__Spirochaetes;c__MVP-15;o__PL-11B10":0.0,"k__Bacteria;p__Spirochaetes;c__Spirochaetes;o__Sphaerochaetales":0.0,"k__Bacteria;p__Spirochaetes;c__Spirochaetes;o__Spirochaetales":0.0,"k__Bacteria;p__Spirochaetes;c__[Leptospirae];o__[Leptospirales]":0.0,"k__Bacteria;p__Synergistetes;c__Synergistia;o__Synergistales":47.0,"k__Bacteria;p__TA06;c__;o__":0.0,"k__Bacteria;p__TM7;c__TM7-1;o__":0.0,"k__Bacteria;p__TM7;c__TM7-3;__":0.0,"k__Bacteria;p__TM7;c__TM7-3;o__":0.0,"k__Bacteria;p__TM7;c__TM7-3;o__CW040":0.0,"k__Bacteria;p__TM7;c__TM7-3;o__I025":0.0,"k__Bacteria;p__Tenericutes;c__Mollicutes;o__":0.0,"k__Bacteria;p__Tenericutes;c__Mollicutes;o__Acholeplasmatales":0.0,"k__Bacteria;p__Tenericutes;c__Mollicutes;o__RF39":0.0,"k__Bacteria;p__Tenericutes;c__RF3;o__ML615J-28":66.0,"k__Bacteria;p__Thermotogae;c__Thermotogae;o__Thermotogales":31.0,"k__Bacteria;p__Verrucomicrobia;c__Verruco-5;o__LD1-PB3":0.0,"k__Bacteria;p__Verrucomicrobia;c__[Pedosphaerae];o__[Pedosphaerales]":0.0,"k__Bacteria;p__WPS-2;c__;o__":0.0,"k__Bacteria;p__WS6;c__SC72;o__A-2AF":0.0,"k__Bacteria;p__WS6;c__SC72;o__WCHB1-15":0.0,"k__Bacteria;p__WWE1;c__[Cloacamonae];o__[Cloacamonales]":0.0,"plant type":"Biogas","plant no.":"#08"},{"index":"09_U341F-U806R-NW3-10","k__Archaea;p__Crenarchaeota;c__MCG;o__pGrfC26":8.0,"k__Archaea;p__Euryarchaeota;c__Methanobacteria;o__Methanobacteriales":51.0,"k__Archaea;p__Euryarchaeota;c__Methanomicrobia;o__Methanomicrobiales":0.0,"k__Archaea;p__Euryarchaeota;c__Methanomicrobia;o__Methanosarcinales":718.0,"k__Archaea;p__Euryarchaeota;c__Thermoplasmata;o__E2":0.0,"k__Archaea;p__[Parvarchaeota];c__[Parvarchaea];o__WCHD3-30":0.0,"k__Bacteria;__;__;__":68.0,"k__Bacteria;p__;c__;o__":208.0,"k__Bacteria;p__Acidobacteria;c__BPC102;o__MVS-40":54.0,"k__Bacteria;p__Acidobacteria;c__Solibacteres;o__Solibacterales":0.0,"k__Bacteria;p__Acidobacteria;c__[Chloracidobacteria];o__RB41":0.0,"k__Bacteria;p__Actinobacteria;c__;o__":0.0,"k__Bacteria;p__Actinobacteria;c__Acidimicrobiia;o__Acidimicrobiales":0.0,"k__Bacteria;p__Actinobacteria;c__Actinobacteria;o__Actinomycetales":30.0,"k__Bacteria;p__Actinobacteria;c__Actinobacteria;o__Bifidobacteriales":0.0,"k__Bacteria;p__Actinobacteria;c__Actinobacteria;o__WCHB1-81":0.0,"k__Bacteria;p__Actinobacteria;c__Coriobacteriia;o__Coriobacteriales":48.0,"k__Bacteria;p__Armatimonadetes;c__SJA-176;o__GAB-B06":0.0,"k__Bacteria;p__Bacteroidetes;__;__":0.0,"k__Bacteria;p__Bacteroidetes;c__Bacteroidia;o__Bacteroidales":4115.0,"k__Bacteria;p__Bacteroidetes;c__Flavobacteriia;o__Flavobacteriales":0.0,"k__Bacteria;p__Bacteroidetes;c__Sphingobacteriia;o__Sphingobacteriales":0.0,"k__Bacteria;p__Bacteroidetes;c__[Saprospirae];o__[Saprospirales]":0.0,"k__Bacteria;p__Caldiserica;c__OP5;o__WCHB1-02":0.0,"k__Bacteria;p__Caldiserica;c__TTA-B1;o__":0.0,"k__Bacteria;p__Chlorobi;c__Ignavibacteria;o__Ignavibacteriales":0.0,"k__Bacteria;p__Chlorobi;c__SJA-28;o__":0.0,"k__Bacteria;p__Chloroflexi;c__;o__":0.0,"k__Bacteria;p__Chloroflexi;c__Anaerolineae;o__Anaerolineales":0.0,"k__Bacteria;p__Chloroflexi;c__Anaerolineae;o__Caldilineales":0.0,"k__Bacteria;p__Chloroflexi;c__Anaerolineae;o__OPB11":0.0,"k__Bacteria;p__Chloroflexi;c__Anaerolineae;o__SBR1031":0.0,"k__Bacteria;p__Chloroflexi;c__Anaerolineae;o__SHA-20":0.0,"k__Bacteria;p__Chloroflexi;c__Dehalococcoidetes;o__Dehalococcoidales":0.0,"k__Bacteria;p__Chloroflexi;c__Ellin6529;o__":0.0,"k__Bacteria;p__Chloroflexi;c__TK17;o__mle1-48":0.0,"k__Bacteria;p__Chloroflexi;c__Thermomicrobia;o__JG30-KF-CM45":0.0,"k__Bacteria;p__Cyanobacteria;c__Chloroplast;o__Streptophyta":2.0,"k__Bacteria;p__EM3;c__;o__":0.0,"k__Bacteria;p__Fibrobacteres;c__Fibrobacteria;o__Fibrobacterales":5.0,"k__Bacteria;p__Fibrobacteres;c__TG3;o__TG3-1":77.0,"k__Bacteria;p__Firmicutes;c__Bacilli;__":0.0,"k__Bacteria;p__Firmicutes;c__Bacilli;o__Bacillales":0.0,"k__Bacteria;p__Firmicutes;c__Bacilli;o__Haloplasmatales":0.0,"k__Bacteria;p__Firmicutes;c__Bacilli;o__Lactobacillales":83.0,"k__Bacteria;p__Firmicutes;c__Bacilli;o__Turicibacterales":34.0,"k__Bacteria;p__Firmicutes;c__Clostridia;__":6.0,"k__Bacteria;p__Firmicutes;c__Clostridia;o__":4.0,"k__Bacteria;p__Firmicutes;c__Clostridia;o__BSA2B-08":4.0,"k__Bacteria;p__Firmicutes;c__Clostridia;o__Clostridiales":3562.0,"k__Bacteria;p__Firmicutes;c__Clostridia;o__Halanaerobiales":0.0,"k__Bacteria;p__Firmicutes;c__Clostridia;o__MBA08":847.0,"k__Bacteria;p__Firmicutes;c__Clostridia;o__Natranaerobiales":41.0,"k__Bacteria;p__Firmicutes;c__Clostridia;o__OPB54":44.0,"k__Bacteria;p__Firmicutes;c__Clostridia;o__SHA-98":39.0,"k__Bacteria;p__Firmicutes;c__Clostridia;o__Thermoanaerobacterales":11.0,"k__Bacteria;p__Firmicutes;c__Erysipelotrichi;o__Erysipelotrichales":80.0,"k__Bacteria;p__Firmicutes;c__OPB54;o__":34.0,"k__Bacteria;p__NKB19;c__noFP_H4;o__":5.0,"k__Bacteria;p__OD1;c__;o__":0.0,"k__Bacteria;p__OD1;c__ABY1;o__":0.0,"k__Bacteria;p__OP1;c__OPB14;o__":0.0,"k__Bacteria;p__OP8;c__OP8_1;o__OPB95":0.0,"k__Bacteria;p__OP9;c__JS1;o__BA021":0.0,"k__Bacteria;p__OP9;c__OPB46;o__OPB72":0.0,"k__Bacteria;p__OP9;c__OPB46;o__SHA-1":11.0,"k__Bacteria;p__Proteobacteria;c__Alphaproteobacteria;__":3.0,"k__Bacteria;p__Proteobacteria;c__Alphaproteobacteria;o__Rhizobiales":0.0,"k__Bacteria;p__Proteobacteria;c__Alphaproteobacteria;o__Rhodobacterales":0.0,"k__Bacteria;p__Proteobacteria;c__Alphaproteobacteria;o__Rhodospirillales":0.0,"k__Bacteria;p__Proteobacteria;c__Alphaproteobacteria;o__Sphingomonadales":0.0,"k__Bacteria;p__Proteobacteria;c__Betaproteobacteria;__":0.0,"k__Bacteria;p__Proteobacteria;c__Betaproteobacteria;o__Burkholderiales":0.0,"k__Bacteria;p__Proteobacteria;c__Betaproteobacteria;o__Thiobacterales":0.0,"k__Bacteria;p__Proteobacteria;c__Deltaproteobacteria;__":9.0,"k__Bacteria;p__Proteobacteria;c__Deltaproteobacteria;o__":0.0,"k__Bacteria;p__Proteobacteria;c__Deltaproteobacteria;o__Syntrophobacterales":0.0,"k__Bacteria;p__Proteobacteria;c__Epsilonproteobacteria;o__Campylobacterales":0.0,"k__Bacteria;p__Proteobacteria;c__Gammaproteobacteria;__":0.0,"k__Bacteria;p__Proteobacteria;c__Gammaproteobacteria;o__Aeromonadales":0.0,"k__Bacteria;p__Proteobacteria;c__Gammaproteobacteria;o__Pseudomonadales":0.0,"k__Bacteria;p__Proteobacteria;c__Gammaproteobacteria;o__Xanthomonadales":0.0,"k__Bacteria;p__SAR406;c__AB16;o__noFP_H7":0.0,"k__Bacteria;p__SR1;c__;o__":168.0,"k__Bacteria;p__Spirochaetes;c__MVP-15;o__PL-11B10":0.0,"k__Bacteria;p__Spirochaetes;c__Spirochaetes;o__Sphaerochaetales":49.0,"k__Bacteria;p__Spirochaetes;c__Spirochaetes;o__Spirochaetales":139.0,"k__Bacteria;p__Spirochaetes;c__[Leptospirae];o__[Leptospirales]":9.0,"k__Bacteria;p__Synergistetes;c__Synergistia;o__Synergistales":158.0,"k__Bacteria;p__TA06;c__;o__":0.0,"k__Bacteria;p__TM7;c__TM7-1;o__":0.0,"k__Bacteria;p__TM7;c__TM7-3;__":0.0,"k__Bacteria;p__TM7;c__TM7-3;o__":0.0,"k__Bacteria;p__TM7;c__TM7-3;o__CW040":67.0,"k__Bacteria;p__TM7;c__TM7-3;o__I025":0.0,"k__Bacteria;p__Tenericutes;c__Mollicutes;o__":7.0,"k__Bacteria;p__Tenericutes;c__Mollicutes;o__Acholeplasmatales":95.0,"k__Bacteria;p__Tenericutes;c__Mollicutes;o__RF39":0.0,"k__Bacteria;p__Tenericutes;c__RF3;o__ML615J-28":182.0,"k__Bacteria;p__Thermotogae;c__Thermotogae;o__Thermotogales":0.0,"k__Bacteria;p__Verrucomicrobia;c__Verruco-5;o__LD1-PB3":0.0,"k__Bacteria;p__Verrucomicrobia;c__[Pedosphaerae];o__[Pedosphaerales]":6.0,"k__Bacteria;p__WPS-2;c__;o__":0.0,"k__Bacteria;p__WS6;c__SC72;o__A-2AF":3.0,"k__Bacteria;p__WS6;c__SC72;o__WCHB1-15":0.0,"k__Bacteria;p__WWE1;c__[Cloacamonae];o__[Cloacamonales]":468.0,"plant type":"Biogas","plant no.":"#09"},{"index":"10_U341F-U806R-NW3-11","k__Archaea;p__Crenarchaeota;c__MCG;o__pGrfC26":0.0,"k__Archaea;p__Euryarchaeota;c__Methanobacteria;o__Methanobacteriales":81.0,"k__Archaea;p__Euryarchaeota;c__Methanomicrobia;o__Methanomicrobiales":0.0,"k__Archaea;p__Euryarchaeota;c__Methanomicrobia;o__Methanosarcinales":0.0,"k__Archaea;p__Euryarchaeota;c__Thermoplasmata;o__E2":0.0,"k__Archaea;p__[Parvarchaeota];c__[Parvarchaea];o__WCHD3-30":0.0,"k__Bacteria;__;__;__":20.0,"k__Bacteria;p__;c__;o__":442.0,"k__Bacteria;p__Acidobacteria;c__BPC102;o__MVS-40":0.0,"k__Bacteria;p__Acidobacteria;c__Solibacteres;o__Solibacterales":0.0,"k__Bacteria;p__Acidobacteria;c__[Chloracidobacteria];o__RB41":0.0,"k__Bacteria;p__Actinobacteria;c__;o__":0.0,"k__Bacteria;p__Actinobacteria;c__Acidimicrobiia;o__Acidimicrobiales":0.0,"k__Bacteria;p__Actinobacteria;c__Actinobacteria;o__Actinomycetales":0.0,"k__Bacteria;p__Actinobacteria;c__Actinobacteria;o__Bifidobacteriales":0.0,"k__Bacteria;p__Actinobacteria;c__Actinobacteria;o__WCHB1-81":0.0,"k__Bacteria;p__Actinobacteria;c__Coriobacteriia;o__Coriobacteriales":0.0,"k__Bacteria;p__Armatimonadetes;c__SJA-176;o__GAB-B06":0.0,"k__Bacteria;p__Bacteroidetes;__;__":885.0,"k__Bacteria;p__Bacteroidetes;c__Bacteroidia;o__Bacteroidales":424.0,"k__Bacteria;p__Bacteroidetes;c__Flavobacteriia;o__Flavobacteriales":0.0,"k__Bacteria;p__Bacteroidetes;c__Sphingobacteriia;o__Sphingobacteriales":0.0,"k__Bacteria;p__Bacteroidetes;c__[Saprospirae];o__[Saprospirales]":0.0,"k__Bacteria;p__Caldiserica;c__OP5;o__WCHB1-02":0.0,"k__Bacteria;p__Caldiserica;c__TTA-B1;o__":0.0,"k__Bacteria;p__Chlorobi;c__Ignavibacteria;o__Ignavibacteriales":0.0,"k__Bacteria;p__Chlorobi;c__SJA-28;o__":0.0,"k__Bacteria;p__Chloroflexi;c__;o__":0.0,"k__Bacteria;p__Chloroflexi;c__Anaerolineae;o__Anaerolineales":0.0,"k__Bacteria;p__Chloroflexi;c__Anaerolineae;o__Caldilineales":0.0,"k__Bacteria;p__Chloroflexi;c__Anaerolineae;o__OPB11":0.0,"k__Bacteria;p__Chloroflexi;c__Anaerolineae;o__SBR1031":0.0,"k__Bacteria;p__Chloroflexi;c__Anaerolineae;o__SHA-20":0.0,"k__Bacteria;p__Chloroflexi;c__Dehalococcoidetes;o__Dehalococcoidales":0.0,"k__Bacteria;p__Chloroflexi;c__Ellin6529;o__":0.0,"k__Bacteria;p__Chloroflexi;c__TK17;o__mle1-48":0.0,"k__Bacteria;p__Chloroflexi;c__Thermomicrobia;o__JG30-KF-CM45":0.0,"k__Bacteria;p__Cyanobacteria;c__Chloroplast;o__Streptophyta":0.0,"k__Bacteria;p__EM3;c__;o__":0.0,"k__Bacteria;p__Fibrobacteres;c__Fibrobacteria;o__Fibrobacterales":0.0,"k__Bacteria;p__Fibrobacteres;c__TG3;o__TG3-1":0.0,"k__Bacteria;p__Firmicutes;c__Bacilli;__":0.0,"k__Bacteria;p__Firmicutes;c__Bacilli;o__Bacillales":0.0,"k__Bacteria;p__Firmicutes;c__Bacilli;o__Haloplasmatales":37.0,"k__Bacteria;p__Firmicutes;c__Bacilli;o__Lactobacillales":0.0,"k__Bacteria;p__Firmicutes;c__Bacilli;o__Turicibacterales":10.0,"k__Bacteria;p__Firmicutes;c__Clostridia;__":512.0,"k__Bacteria;p__Firmicutes;c__Clostridia;o__":17.0,"k__Bacteria;p__Firmicutes;c__Clostridia;o__BSA2B-08":44.0,"k__Bacteria;p__Firmicutes;c__Clostridia;o__Clostridiales":1345.0,"k__Bacteria;p__Firmicutes;c__Clostridia;o__Halanaerobiales":240.0,"k__Bacteria;p__Firmicutes;c__Clostridia;o__MBA08":3926.0,"k__Bacteria;p__Firmicutes;c__Clostridia;o__Natranaerobiales":26.0,"k__Bacteria;p__Firmicutes;c__Clostridia;o__OPB54":36.0,"k__Bacteria;p__Firmicutes;c__Clostridia;o__SHA-98":1320.0,"k__Bacteria;p__Firmicutes;c__Clostridia;o__Thermoanaerobacterales":472.0,"k__Bacteria;p__Firmicutes;c__Erysipelotrichi;o__Erysipelotrichales":0.0,"k__Bacteria;p__Firmicutes;c__OPB54;o__":133.0,"k__Bacteria;p__NKB19;c__noFP_H4;o__":0.0,"k__Bacteria;p__OD1;c__;o__":0.0,"k__Bacteria;p__OD1;c__ABY1;o__":0.0,"k__Bacteria;p__OP1;c__OPB14;o__":0.0,"k__Bacteria;p__OP8;c__OP8_1;o__OPB95":0.0,"k__Bacteria;p__OP9;c__JS1;o__BA021":0.0,"k__Bacteria;p__OP9;c__OPB46;o__OPB72":15.0,"k__Bacteria;p__OP9;c__OPB46;o__SHA-1":0.0,"k__Bacteria;p__Proteobacteria;c__Alphaproteobacteria;__":0.0,"k__Bacteria;p__Proteobacteria;c__Alphaproteobacteria;o__Rhizobiales":0.0,"k__Bacteria;p__Proteobacteria;c__Alphaproteobacteria;o__Rhodobacterales":0.0,"k__Bacteria;p__Proteobacteria;c__Alphaproteobacteria;o__Rhodospirillales":0.0,"k__Bacteria;p__Proteobacteria;c__Alphaproteobacteria;o__Sphingomonadales":0.0,"k__Bacteria;p__Proteobacteria;c__Betaproteobacteria;__":0.0,"k__Bacteria;p__Proteobacteria;c__Betaproteobacteria;o__Burkholderiales":0.0,"k__Bacteria;p__Proteobacteria;c__Betaproteobacteria;o__Thiobacterales":0.0,"k__Bacteria;p__Proteobacteria;c__Deltaproteobacteria;__":0.0,"k__Bacteria;p__Proteobacteria;c__Deltaproteobacteria;o__":0.0,"k__Bacteria;p__Proteobacteria;c__Deltaproteobacteria;o__Syntrophobacterales":0.0,"k__Bacteria;p__Proteobacteria;c__Epsilonproteobacteria;o__Campylobacterales":0.0,"k__Bacteria;p__Proteobacteria;c__Gammaproteobacteria;__":0.0,"k__Bacteria;p__Proteobacteria;c__Gammaproteobacteria;o__Aeromonadales":0.0,"k__Bacteria;p__Proteobacteria;c__Gammaproteobacteria;o__Pseudomonadales":0.0,"k__Bacteria;p__Proteobacteria;c__Gammaproteobacteria;o__Xanthomonadales":0.0,"k__Bacteria;p__SAR406;c__AB16;o__noFP_H7":0.0,"k__Bacteria;p__SR1;c__;o__":0.0,"k__Bacteria;p__Spirochaetes;c__MVP-15;o__PL-11B10":0.0,"k__Bacteria;p__Spirochaetes;c__Spirochaetes;o__Sphaerochaetales":0.0,"k__Bacteria;p__Spirochaetes;c__Spirochaetes;o__Spirochaetales":0.0,"k__Bacteria;p__Spirochaetes;c__[Leptospirae];o__[Leptospirales]":0.0,"k__Bacteria;p__Synergistetes;c__Synergistia;o__Synergistales":55.0,"k__Bacteria;p__TA06;c__;o__":0.0,"k__Bacteria;p__TM7;c__TM7-1;o__":0.0,"k__Bacteria;p__TM7;c__TM7-3;__":0.0,"k__Bacteria;p__TM7;c__TM7-3;o__":0.0,"k__Bacteria;p__TM7;c__TM7-3;o__CW040":0.0,"k__Bacteria;p__TM7;c__TM7-3;o__I025":0.0,"k__Bacteria;p__Tenericutes;c__Mollicutes;o__":0.0,"k__Bacteria;p__Tenericutes;c__Mollicutes;o__Acholeplasmatales":0.0,"k__Bacteria;p__Tenericutes;c__Mollicutes;o__RF39":0.0,"k__Bacteria;p__Tenericutes;c__RF3;o__ML615J-28":175.0,"k__Bacteria;p__Thermotogae;c__Thermotogae;o__Thermotogales":1476.0,"k__Bacteria;p__Verrucomicrobia;c__Verruco-5;o__LD1-PB3":0.0,"k__Bacteria;p__Verrucomicrobia;c__[Pedosphaerae];o__[Pedosphaerales]":0.0,"k__Bacteria;p__WPS-2;c__;o__":0.0,"k__Bacteria;p__WS6;c__SC72;o__A-2AF":0.0,"k__Bacteria;p__WS6;c__SC72;o__WCHB1-15":0.0,"k__Bacteria;p__WWE1;c__[Cloacamonae];o__[Cloacamonales]":0.0,"plant type":"Biogas","plant no.":"#10"},{"index":"11_U341F-U806R-NW3-12","k__Archaea;p__Crenarchaeota;c__MCG;o__pGrfC26":0.0,"k__Archaea;p__Euryarchaeota;c__Methanobacteria;o__Methanobacteriales":0.0,"k__Archaea;p__Euryarchaeota;c__Methanomicrobia;o__Methanomicrobiales":11.0,"k__Archaea;p__Euryarchaeota;c__Methanomicrobia;o__Methanosarcinales":18.0,"k__Archaea;p__Euryarchaeota;c__Thermoplasmata;o__E2":6.0,"k__Archaea;p__[Parvarchaeota];c__[Parvarchaea];o__WCHD3-30":0.0,"k__Bacteria;__;__;__":126.0,"k__Bacteria;p__;c__;o__":266.0,"k__Bacteria;p__Acidobacteria;c__BPC102;o__MVS-40":19.0,"k__Bacteria;p__Acidobacteria;c__Solibacteres;o__Solibacterales":0.0,"k__Bacteria;p__Acidobacteria;c__[Chloracidobacteria];o__RB41":0.0,"k__Bacteria;p__Actinobacteria;c__;o__":0.0,"k__Bacteria;p__Actinobacteria;c__Acidimicrobiia;o__Acidimicrobiales":0.0,"k__Bacteria;p__Actinobacteria;c__Actinobacteria;o__Actinomycetales":0.0,"k__Bacteria;p__Actinobacteria;c__Actinobacteria;o__Bifidobacteriales":0.0,"k__Bacteria;p__Actinobacteria;c__Actinobacteria;o__WCHB1-81":0.0,"k__Bacteria;p__Actinobacteria;c__Coriobacteriia;o__Coriobacteriales":0.0,"k__Bacteria;p__Armatimonadetes;c__SJA-176;o__GAB-B06":0.0,"k__Bacteria;p__Bacteroidetes;__;__":226.0,"k__Bacteria;p__Bacteroidetes;c__Bacteroidia;o__Bacteroidales":1192.0,"k__Bacteria;p__Bacteroidetes;c__Flavobacteriia;o__Flavobacteriales":0.0,"k__Bacteria;p__Bacteroidetes;c__Sphingobacteriia;o__Sphingobacteriales":0.0,"k__Bacteria;p__Bacteroidetes;c__[Saprospirae];o__[Saprospirales]":0.0,"k__Bacteria;p__Caldiserica;c__OP5;o__WCHB1-02":0.0,"k__Bacteria;p__Caldiserica;c__TTA-B1;o__":0.0,"k__Bacteria;p__Chlorobi;c__Ignavibacteria;o__Ignavibacteriales":0.0,"k__Bacteria;p__Chlorobi;c__SJA-28;o__":0.0,"k__Bacteria;p__Chloroflexi;c__;o__":0.0,"k__Bacteria;p__Chloroflexi;c__Anaerolineae;o__Anaerolineales":0.0,"k__Bacteria;p__Chloroflexi;c__Anaerolineae;o__Caldilineales":0.0,"k__Bacteria;p__Chloroflexi;c__Anaerolineae;o__OPB11":0.0,"k__Bacteria;p__Chloroflexi;c__Anaerolineae;o__SBR1031":0.0,"k__Bacteria;p__Chloroflexi;c__Anaerolineae;o__SHA-20":0.0,"k__Bacteria;p__Chloroflexi;c__Dehalococcoidetes;o__Dehalococcoidales":0.0,"k__Bacteria;p__Chloroflexi;c__Ellin6529;o__":0.0,"k__Bacteria;p__Chloroflexi;c__TK17;o__mle1-48":0.0,"k__Bacteria;p__Chloroflexi;c__Thermomicrobia;o__JG30-KF-CM45":0.0,"k__Bacteria;p__Cyanobacteria;c__Chloroplast;o__Streptophyta":0.0,"k__Bacteria;p__EM3;c__;o__":0.0,"k__Bacteria;p__Fibrobacteres;c__Fibrobacteria;o__Fibrobacterales":7.0,"k__Bacteria;p__Fibrobacteres;c__TG3;o__TG3-1":22.0,"k__Bacteria;p__Firmicutes;c__Bacilli;__":0.0,"k__Bacteria;p__Firmicutes;c__Bacilli;o__Bacillales":0.0,"k__Bacteria;p__Firmicutes;c__Bacilli;o__Haloplasmatales":0.0,"k__Bacteria;p__Firmicutes;c__Bacilli;o__Lactobacillales":54.0,"k__Bacteria;p__Firmicutes;c__Bacilli;o__Turicibacterales":10.0,"k__Bacteria;p__Firmicutes;c__Clostridia;__":329.0,"k__Bacteria;p__Firmicutes;c__Clostridia;o__":9.0,"k__Bacteria;p__Firmicutes;c__Clostridia;o__BSA2B-08":0.0,"k__Bacteria;p__Firmicutes;c__Clostridia;o__Clostridiales":2622.0,"k__Bacteria;p__Firmicutes;c__Clostridia;o__Halanaerobiales":17.0,"k__Bacteria;p__Firmicutes;c__Clostridia;o__MBA08":3666.0,"k__Bacteria;p__Firmicutes;c__Clostridia;o__Natranaerobiales":154.0,"k__Bacteria;p__Firmicutes;c__Clostridia;o__OPB54":59.0,"k__Bacteria;p__Firmicutes;c__Clostridia;o__SHA-98":1365.0,"k__Bacteria;p__Firmicutes;c__Clostridia;o__Thermoanaerobacterales":385.0,"k__Bacteria;p__Firmicutes;c__Erysipelotrichi;o__Erysipelotrichales":51.0,"k__Bacteria;p__Firmicutes;c__OPB54;o__":107.0,"k__Bacteria;p__NKB19;c__noFP_H4;o__":0.0,"k__Bacteria;p__OD1;c__;o__":32.0,"k__Bacteria;p__OD1;c__ABY1;o__":0.0,"k__Bacteria;p__OP1;c__OPB14;o__":0.0,"k__Bacteria;p__OP8;c__OP8_1;o__OPB95":0.0,"k__Bacteria;p__OP9;c__JS1;o__BA021":0.0,"k__Bacteria;p__OP9;c__OPB46;o__OPB72":28.0,"k__Bacteria;p__OP9;c__OPB46;o__SHA-1":29.0,"k__Bacteria;p__Proteobacteria;c__Alphaproteobacteria;__":0.0,"k__Bacteria;p__Proteobacteria;c__Alphaproteobacteria;o__Rhizobiales":0.0,"k__Bacteria;p__Proteobacteria;c__Alphaproteobacteria;o__Rhodobacterales":0.0,"k__Bacteria;p__Proteobacteria;c__Alphaproteobacteria;o__Rhodospirillales":0.0,"k__Bacteria;p__Proteobacteria;c__Alphaproteobacteria;o__Sphingomonadales":0.0,"k__Bacteria;p__Proteobacteria;c__Betaproteobacteria;__":0.0,"k__Bacteria;p__Proteobacteria;c__Betaproteobacteria;o__Burkholderiales":0.0,"k__Bacteria;p__Proteobacteria;c__Betaproteobacteria;o__Thiobacterales":0.0,"k__Bacteria;p__Proteobacteria;c__Deltaproteobacteria;__":0.0,"k__Bacteria;p__Proteobacteria;c__Deltaproteobacteria;o__":0.0,"k__Bacteria;p__Proteobacteria;c__Deltaproteobacteria;o__Syntrophobacterales":0.0,"k__Bacteria;p__Proteobacteria;c__Epsilonproteobacteria;o__Campylobacterales":0.0,"k__Bacteria;p__Proteobacteria;c__Gammaproteobacteria;__":0.0,"k__Bacteria;p__Proteobacteria;c__Gammaproteobacteria;o__Aeromonadales":0.0,"k__Bacteria;p__Proteobacteria;c__Gammaproteobacteria;o__Pseudomonadales":0.0,"k__Bacteria;p__Proteobacteria;c__Gammaproteobacteria;o__Xanthomonadales":0.0,"k__Bacteria;p__SAR406;c__AB16;o__noFP_H7":0.0,"k__Bacteria;p__SR1;c__;o__":16.0,"k__Bacteria;p__Spirochaetes;c__MVP-15;o__PL-11B10":0.0,"k__Bacteria;p__Spirochaetes;c__Spirochaetes;o__Sphaerochaetales":0.0,"k__Bacteria;p__Spirochaetes;c__Spirochaetes;o__Spirochaetales":26.0,"k__Bacteria;p__Spirochaetes;c__[Leptospirae];o__[Leptospirales]":0.0,"k__Bacteria;p__Synergistetes;c__Synergistia;o__Synergistales":284.0,"k__Bacteria;p__TA06;c__;o__":0.0,"k__Bacteria;p__TM7;c__TM7-1;o__":0.0,"k__Bacteria;p__TM7;c__TM7-3;__":0.0,"k__Bacteria;p__TM7;c__TM7-3;o__":0.0,"k__Bacteria;p__TM7;c__TM7-3;o__CW040":0.0,"k__Bacteria;p__TM7;c__TM7-3;o__I025":0.0,"k__Bacteria;p__Tenericutes;c__Mollicutes;o__":0.0,"k__Bacteria;p__Tenericutes;c__Mollicutes;o__Acholeplasmatales":44.0,"k__Bacteria;p__Tenericutes;c__Mollicutes;o__RF39":0.0,"k__Bacteria;p__Tenericutes;c__RF3;o__ML615J-28":68.0,"k__Bacteria;p__Thermotogae;c__Thermotogae;o__Thermotogales":223.0,"k__Bacteria;p__Verrucomicrobia;c__Verruco-5;o__LD1-PB3":0.0,"k__Bacteria;p__Verrucomicrobia;c__[Pedosphaerae];o__[Pedosphaerales]":0.0,"k__Bacteria;p__WPS-2;c__;o__":0.0,"k__Bacteria;p__WS6;c__SC72;o__A-2AF":0.0,"k__Bacteria;p__WS6;c__SC72;o__WCHB1-15":0.0,"k__Bacteria;p__WWE1;c__[Cloacamonae];o__[Cloacamonales]":1015.0,"plant type":"Biogas","plant no.":"#11"},{"index":"12_U341F-U806R-NW3-14","k__Archaea;p__Crenarchaeota;c__MCG;o__pGrfC26":0.0,"k__Archaea;p__Euryarchaeota;c__Methanobacteria;o__Methanobacteriales":15.0,"k__Archaea;p__Euryarchaeota;c__Methanomicrobia;o__Methanomicrobiales":13.0,"k__Archaea;p__Euryarchaeota;c__Methanomicrobia;o__Methanosarcinales":12.0,"k__Archaea;p__Euryarchaeota;c__Thermoplasmata;o__E2":0.0,"k__Archaea;p__[Parvarchaeota];c__[Parvarchaea];o__WCHD3-30":0.0,"k__Bacteria;__;__;__":21.0,"k__Bacteria;p__;c__;o__":247.0,"k__Bacteria;p__Acidobacteria;c__BPC102;o__MVS-40":0.0,"k__Bacteria;p__Acidobacteria;c__Solibacteres;o__Solibacterales":0.0,"k__Bacteria;p__Acidobacteria;c__[Chloracidobacteria];o__RB41":0.0,"k__Bacteria;p__Actinobacteria;c__;o__":0.0,"k__Bacteria;p__Actinobacteria;c__Acidimicrobiia;o__Acidimicrobiales":0.0,"k__Bacteria;p__Actinobacteria;c__Actinobacteria;o__Actinomycetales":0.0,"k__Bacteria;p__Actinobacteria;c__Actinobacteria;o__Bifidobacteriales":0.0,"k__Bacteria;p__Actinobacteria;c__Actinobacteria;o__WCHB1-81":0.0,"k__Bacteria;p__Actinobacteria;c__Coriobacteriia;o__Coriobacteriales":0.0,"k__Bacteria;p__Armatimonadetes;c__SJA-176;o__GAB-B06":0.0,"k__Bacteria;p__Bacteroidetes;__;__":307.0,"k__Bacteria;p__Bacteroidetes;c__Bacteroidia;o__Bacteroidales":2358.0,"k__Bacteria;p__Bacteroidetes;c__Flavobacteriia;o__Flavobacteriales":0.0,"k__Bacteria;p__Bacteroidetes;c__Sphingobacteriia;o__Sphingobacteriales":0.0,"k__Bacteria;p__Bacteroidetes;c__[Saprospirae];o__[Saprospirales]":0.0,"k__Bacteria;p__Caldiserica;c__OP5;o__WCHB1-02":0.0,"k__Bacteria;p__Caldiserica;c__TTA-B1;o__":0.0,"k__Bacteria;p__Chlorobi;c__Ignavibacteria;o__Ignavibacteriales":0.0,"k__Bacteria;p__Chlorobi;c__SJA-28;o__":0.0,"k__Bacteria;p__Chloroflexi;c__;o__":0.0,"k__Bacteria;p__Chloroflexi;c__Anaerolineae;o__Anaerolineales":0.0,"k__Bacteria;p__Chloroflexi;c__Anaerolineae;o__Caldilineales":0.0,"k__Bacteria;p__Chloroflexi;c__Anaerolineae;o__OPB11":0.0,"k__Bacteria;p__Chloroflexi;c__Anaerolineae;o__SBR1031":0.0,"k__Bacteria;p__Chloroflexi;c__Anaerolineae;o__SHA-20":0.0,"k__Bacteria;p__Chloroflexi;c__Dehalococcoidetes;o__Dehalococcoidales":0.0,"k__Bacteria;p__Chloroflexi;c__Ellin6529;o__":0.0,"k__Bacteria;p__Chloroflexi;c__TK17;o__mle1-48":0.0,"k__Bacteria;p__Chloroflexi;c__Thermomicrobia;o__JG30-KF-CM45":0.0,"k__Bacteria;p__Cyanobacteria;c__Chloroplast;o__Streptophyta":0.0,"k__Bacteria;p__EM3;c__;o__":0.0,"k__Bacteria;p__Fibrobacteres;c__Fibrobacteria;o__Fibrobacterales":0.0,"k__Bacteria;p__Fibrobacteres;c__TG3;o__TG3-1":0.0,"k__Bacteria;p__Firmicutes;c__Bacilli;__":0.0,"k__Bacteria;p__Firmicutes;c__Bacilli;o__Bacillales":32.0,"k__Bacteria;p__Firmicutes;c__Bacilli;o__Haloplasmatales":0.0,"k__Bacteria;p__Firmicutes;c__Bacilli;o__Lactobacillales":55.0,"k__Bacteria;p__Firmicutes;c__Bacilli;o__Turicibacterales":0.0,"k__Bacteria;p__Firmicutes;c__Clostridia;__":249.0,"k__Bacteria;p__Firmicutes;c__Clostridia;o__":10.0,"k__Bacteria;p__Firmicutes;c__Clostridia;o__BSA2B-08":0.0,"k__Bacteria;p__Firmicutes;c__Clostridia;o__Clostridiales":3083.0,"k__Bacteria;p__Firmicutes;c__Clostridia;o__Halanaerobiales":407.0,"k__Bacteria;p__Firmicutes;c__Clostridia;o__MBA08":2388.0,"k__Bacteria;p__Firmicutes;c__Clostridia;o__Natranaerobiales":18.0,"k__Bacteria;p__Firmicutes;c__Clostridia;o__OPB54":43.0,"k__Bacteria;p__Firmicutes;c__Clostridia;o__SHA-98":911.0,"k__Bacteria;p__Firmicutes;c__Clostridia;o__Thermoanaerobacterales":161.0,"k__Bacteria;p__Firmicutes;c__Erysipelotrichi;o__Erysipelotrichales":21.0,"k__Bacteria;p__Firmicutes;c__OPB54;o__":94.0,"k__Bacteria;p__NKB19;c__noFP_H4;o__":0.0,"k__Bacteria;p__OD1;c__;o__":10.0,"k__Bacteria;p__OD1;c__ABY1;o__":0.0,"k__Bacteria;p__OP1;c__OPB14;o__":0.0,"k__Bacteria;p__OP8;c__OP8_1;o__OPB95":0.0,"k__Bacteria;p__OP9;c__JS1;o__BA021":0.0,"k__Bacteria;p__OP9;c__OPB46;o__OPB72":7.0,"k__Bacteria;p__OP9;c__OPB46;o__SHA-1":0.0,"k__Bacteria;p__Proteobacteria;c__Alphaproteobacteria;__":0.0,"k__Bacteria;p__Proteobacteria;c__Alphaproteobacteria;o__Rhizobiales":0.0,"k__Bacteria;p__Proteobacteria;c__Alphaproteobacteria;o__Rhodobacterales":0.0,"k__Bacteria;p__Proteobacteria;c__Alphaproteobacteria;o__Rhodospirillales":0.0,"k__Bacteria;p__Proteobacteria;c__Alphaproteobacteria;o__Sphingomonadales":0.0,"k__Bacteria;p__Proteobacteria;c__Betaproteobacteria;__":0.0,"k__Bacteria;p__Proteobacteria;c__Betaproteobacteria;o__Burkholderiales":0.0,"k__Bacteria;p__Proteobacteria;c__Betaproteobacteria;o__Thiobacterales":0.0,"k__Bacteria;p__Proteobacteria;c__Deltaproteobacteria;__":0.0,"k__Bacteria;p__Proteobacteria;c__Deltaproteobacteria;o__":0.0,"k__Bacteria;p__Proteobacteria;c__Deltaproteobacteria;o__Syntrophobacterales":0.0,"k__Bacteria;p__Proteobacteria;c__Epsilonproteobacteria;o__Campylobacterales":0.0,"k__Bacteria;p__Proteobacteria;c__Gammaproteobacteria;__":0.0,"k__Bacteria;p__Proteobacteria;c__Gammaproteobacteria;o__Aeromonadales":0.0,"k__Bacteria;p__Proteobacteria;c__Gammaproteobacteria;o__Pseudomonadales":0.0,"k__Bacteria;p__Proteobacteria;c__Gammaproteobacteria;o__Xanthomonadales":0.0,"k__Bacteria;p__SAR406;c__AB16;o__noFP_H7":0.0,"k__Bacteria;p__SR1;c__;o__":0.0,"k__Bacteria;p__Spirochaetes;c__MVP-15;o__PL-11B10":0.0,"k__Bacteria;p__Spirochaetes;c__Spirochaetes;o__Sphaerochaetales":0.0,"k__Bacteria;p__Spirochaetes;c__Spirochaetes;o__Spirochaetales":0.0,"k__Bacteria;p__Spirochaetes;c__[Leptospirae];o__[Leptospirales]":0.0,"k__Bacteria;p__Synergistetes;c__Synergistia;o__Synergistales":70.0,"k__Bacteria;p__TA06;c__;o__":0.0,"k__Bacteria;p__TM7;c__TM7-1;o__":0.0,"k__Bacteria;p__TM7;c__TM7-3;__":0.0,"k__Bacteria;p__TM7;c__TM7-3;o__":0.0,"k__Bacteria;p__TM7;c__TM7-3;o__CW040":0.0,"k__Bacteria;p__TM7;c__TM7-3;o__I025":0.0,"k__Bacteria;p__Tenericutes;c__Mollicutes;o__":12.0,"k__Bacteria;p__Tenericutes;c__Mollicutes;o__Acholeplasmatales":0.0,"k__Bacteria;p__Tenericutes;c__Mollicutes;o__RF39":0.0,"k__Bacteria;p__Tenericutes;c__RF3;o__ML615J-28":371.0,"k__Bacteria;p__Thermotogae;c__Thermotogae;o__Thermotogales":0.0,"k__Bacteria;p__Verrucomicrobia;c__Verruco-5;o__LD1-PB3":0.0,"k__Bacteria;p__Verrucomicrobia;c__[Pedosphaerae];o__[Pedosphaerales]":0.0,"k__Bacteria;p__WPS-2;c__;o__":0.0,"k__Bacteria;p__WS6;c__SC72;o__A-2AF":0.0,"k__Bacteria;p__WS6;c__SC72;o__WCHB1-15":0.0,"k__Bacteria;p__WWE1;c__[Cloacamonae];o__[Cloacamonales]":0.0,"plant type":"Biogas","plant no.":"#12"},{"index":"13_U341F-U806R-NW3-15","k__Archaea;p__Crenarchaeota;c__MCG;o__pGrfC26":0.0,"k__Archaea;p__Euryarchaeota;c__Methanobacteria;o__Methanobacteriales":10.0,"k__Archaea;p__Euryarchaeota;c__Methanomicrobia;o__Methanomicrobiales":24.0,"k__Archaea;p__Euryarchaeota;c__Methanomicrobia;o__Methanosarcinales":583.0,"k__Archaea;p__Euryarchaeota;c__Thermoplasmata;o__E2":4.0,"k__Archaea;p__[Parvarchaeota];c__[Parvarchaea];o__WCHD3-30":0.0,"k__Bacteria;__;__;__":34.0,"k__Bacteria;p__;c__;o__":451.0,"k__Bacteria;p__Acidobacteria;c__BPC102;o__MVS-40":0.0,"k__Bacteria;p__Acidobacteria;c__Solibacteres;o__Solibacterales":0.0,"k__Bacteria;p__Acidobacteria;c__[Chloracidobacteria];o__RB41":0.0,"k__Bacteria;p__Actinobacteria;c__;o__":0.0,"k__Bacteria;p__Actinobacteria;c__Acidimicrobiia;o__Acidimicrobiales":0.0,"k__Bacteria;p__Actinobacteria;c__Actinobacteria;o__Actinomycetales":35.0,"k__Bacteria;p__Actinobacteria;c__Actinobacteria;o__Bifidobacteriales":0.0,"k__Bacteria;p__Actinobacteria;c__Actinobacteria;o__WCHB1-81":0.0,"k__Bacteria;p__Actinobacteria;c__Coriobacteriia;o__Coriobacteriales":0.0,"k__Bacteria;p__Armatimonadetes;c__SJA-176;o__GAB-B06":0.0,"k__Bacteria;p__Bacteroidetes;__;__":822.0,"k__Bacteria;p__Bacteroidetes;c__Bacteroidia;o__Bacteroidales":851.0,"k__Bacteria;p__Bacteroidetes;c__Flavobacteriia;o__Flavobacteriales":0.0,"k__Bacteria;p__Bacteroidetes;c__Sphingobacteriia;o__Sphingobacteriales":0.0,"k__Bacteria;p__Bacteroidetes;c__[Saprospirae];o__[Saprospirales]":0.0,"k__Bacteria;p__Caldiserica;c__OP5;o__WCHB1-02":0.0,"k__Bacteria;p__Caldiserica;c__TTA-B1;o__":0.0,"k__Bacteria;p__Chlorobi;c__Ignavibacteria;o__Ignavibacteriales":0.0,"k__Bacteria;p__Chlorobi;c__SJA-28;o__":0.0,"k__Bacteria;p__Chloroflexi;c__;o__":0.0,"k__Bacteria;p__Chloroflexi;c__Anaerolineae;o__Anaerolineales":0.0,"k__Bacteria;p__Chloroflexi;c__Anaerolineae;o__Caldilineales":0.0,"k__Bacteria;p__Chloroflexi;c__Anaerolineae;o__OPB11":0.0,"k__Bacteria;p__Chloroflexi;c__Anaerolineae;o__SBR1031":0.0,"k__Bacteria;p__Chloroflexi;c__Anaerolineae;o__SHA-20":0.0,"k__Bacteria;p__Chloroflexi;c__Dehalococcoidetes;o__Dehalococcoidales":0.0,"k__Bacteria;p__Chloroflexi;c__Ellin6529;o__":0.0,"k__Bacteria;p__Chloroflexi;c__TK17;o__mle1-48":0.0,"k__Bacteria;p__Chloroflexi;c__Thermomicrobia;o__JG30-KF-CM45":0.0,"k__Bacteria;p__Cyanobacteria;c__Chloroplast;o__Streptophyta":0.0,"k__Bacteria;p__EM3;c__;o__":0.0,"k__Bacteria;p__Fibrobacteres;c__Fibrobacteria;o__Fibrobacterales":0.0,"k__Bacteria;p__Fibrobacteres;c__TG3;o__TG3-1":0.0,"k__Bacteria;p__Firmicutes;c__Bacilli;__":0.0,"k__Bacteria;p__Firmicutes;c__Bacilli;o__Bacillales":167.0,"k__Bacteria;p__Firmicutes;c__Bacilli;o__Haloplasmatales":0.0,"k__Bacteria;p__Firmicutes;c__Bacilli;o__Lactobacillales":318.0,"k__Bacteria;p__Firmicutes;c__Bacilli;o__Turicibacterales":22.0,"k__Bacteria;p__Firmicutes;c__Clostridia;__":482.0,"k__Bacteria;p__Firmicutes;c__Clostridia;o__":21.0,"k__Bacteria;p__Firmicutes;c__Clostridia;o__BSA2B-08":44.0,"k__Bacteria;p__Firmicutes;c__Clostridia;o__Clostridiales":2456.0,"k__Bacteria;p__Firmicutes;c__Clostridia;o__Halanaerobiales":167.0,"k__Bacteria;p__Firmicutes;c__Clostridia;o__MBA08":4134.0,"k__Bacteria;p__Firmicutes;c__Clostridia;o__Natranaerobiales":291.0,"k__Bacteria;p__Firmicutes;c__Clostridia;o__OPB54":57.0,"k__Bacteria;p__Firmicutes;c__Clostridia;o__SHA-98":904.0,"k__Bacteria;p__Firmicutes;c__Clostridia;o__Thermoanaerobacterales":269.0,"k__Bacteria;p__Firmicutes;c__Erysipelotrichi;o__Erysipelotrichales":19.0,"k__Bacteria;p__Firmicutes;c__OPB54;o__":104.0,"k__Bacteria;p__NKB19;c__noFP_H4;o__":0.0,"k__Bacteria;p__OD1;c__;o__":0.0,"k__Bacteria;p__OD1;c__ABY1;o__":0.0,"k__Bacteria;p__OP1;c__OPB14;o__":0.0,"k__Bacteria;p__OP8;c__OP8_1;o__OPB95":0.0,"k__Bacteria;p__OP9;c__JS1;o__BA021":0.0,"k__Bacteria;p__OP9;c__OPB46;o__OPB72":65.0,"k__Bacteria;p__OP9;c__OPB46;o__SHA-1":9.0,"k__Bacteria;p__Proteobacteria;c__Alphaproteobacteria;__":0.0,"k__Bacteria;p__Proteobacteria;c__Alphaproteobacteria;o__Rhizobiales":0.0,"k__Bacteria;p__Proteobacteria;c__Alphaproteobacteria;o__Rhodobacterales":0.0,"k__Bacteria;p__Proteobacteria;c__Alphaproteobacteria;o__Rhodospirillales":0.0,"k__Bacteria;p__Proteobacteria;c__Alphaproteobacteria;o__Sphingomonadales":0.0,"k__Bacteria;p__Proteobacteria;c__Betaproteobacteria;__":0.0,"k__Bacteria;p__Proteobacteria;c__Betaproteobacteria;o__Burkholderiales":0.0,"k__Bacteria;p__Proteobacteria;c__Betaproteobacteria;o__Thiobacterales":0.0,"k__Bacteria;p__Proteobacteria;c__Deltaproteobacteria;__":0.0,"k__Bacteria;p__Proteobacteria;c__Deltaproteobacteria;o__":0.0,"k__Bacteria;p__Proteobacteria;c__Deltaproteobacteria;o__Syntrophobacterales":0.0,"k__Bacteria;p__Proteobacteria;c__Epsilonproteobacteria;o__Campylobacterales":0.0,"k__Bacteria;p__Proteobacteria;c__Gammaproteobacteria;__":0.0,"k__Bacteria;p__Proteobacteria;c__Gammaproteobacteria;o__Aeromonadales":0.0,"k__Bacteria;p__Proteobacteria;c__Gammaproteobacteria;o__Pseudomonadales":0.0,"k__Bacteria;p__Proteobacteria;c__Gammaproteobacteria;o__Xanthomonadales":0.0,"k__Bacteria;p__SAR406;c__AB16;o__noFP_H7":0.0,"k__Bacteria;p__SR1;c__;o__":0.0,"k__Bacteria;p__Spirochaetes;c__MVP-15;o__PL-11B10":0.0,"k__Bacteria;p__Spirochaetes;c__Spirochaetes;o__Sphaerochaetales":0.0,"k__Bacteria;p__Spirochaetes;c__Spirochaetes;o__Spirochaetales":5.0,"k__Bacteria;p__Spirochaetes;c__[Leptospirae];o__[Leptospirales]":0.0,"k__Bacteria;p__Synergistetes;c__Synergistia;o__Synergistales":70.0,"k__Bacteria;p__TA06;c__;o__":0.0,"k__Bacteria;p__TM7;c__TM7-1;o__":0.0,"k__Bacteria;p__TM7;c__TM7-3;__":0.0,"k__Bacteria;p__TM7;c__TM7-3;o__":0.0,"k__Bacteria;p__TM7;c__TM7-3;o__CW040":0.0,"k__Bacteria;p__TM7;c__TM7-3;o__I025":0.0,"k__Bacteria;p__Tenericutes;c__Mollicutes;o__":0.0,"k__Bacteria;p__Tenericutes;c__Mollicutes;o__Acholeplasmatales":90.0,"k__Bacteria;p__Tenericutes;c__Mollicutes;o__RF39":0.0,"k__Bacteria;p__Tenericutes;c__RF3;o__ML615J-28":211.0,"k__Bacteria;p__Thermotogae;c__Thermotogae;o__Thermotogales":0.0,"k__Bacteria;p__Verrucomicrobia;c__Verruco-5;o__LD1-PB3":0.0,"k__Bacteria;p__Verrucomicrobia;c__[Pedosphaerae];o__[Pedosphaerales]":0.0,"k__Bacteria;p__WPS-2;c__;o__":0.0,"k__Bacteria;p__WS6;c__SC72;o__A-2AF":2.0,"k__Bacteria;p__WS6;c__SC72;o__WCHB1-15":0.0,"k__Bacteria;p__WWE1;c__[Cloacamonae];o__[Cloacamonales]":8.0,"plant type":"Biogas","plant no.":"#13"},{"index":"14_U341F-U806R-NW3-7","k__Archaea;p__Crenarchaeota;c__MCG;o__pGrfC26":0.0,"k__Archaea;p__Euryarchaeota;c__Methanobacteria;o__Methanobacteriales":13.0,"k__Archaea;p__Euryarchaeota;c__Methanomicrobia;o__Methanomicrobiales":94.0,"k__Archaea;p__Euryarchaeota;c__Methanomicrobia;o__Methanosarcinales":697.0,"k__Archaea;p__Euryarchaeota;c__Thermoplasmata;o__E2":0.0,"k__Archaea;p__[Parvarchaeota];c__[Parvarchaea];o__WCHD3-30":0.0,"k__Bacteria;__;__;__":224.0,"k__Bacteria;p__;c__;o__":905.0,"k__Bacteria;p__Acidobacteria;c__BPC102;o__MVS-40":10.0,"k__Bacteria;p__Acidobacteria;c__Solibacteres;o__Solibacterales":9.0,"k__Bacteria;p__Acidobacteria;c__[Chloracidobacteria];o__RB41":0.0,"k__Bacteria;p__Actinobacteria;c__;o__":16.0,"k__Bacteria;p__Actinobacteria;c__Acidimicrobiia;o__Acidimicrobiales":112.0,"k__Bacteria;p__Actinobacteria;c__Actinobacteria;o__Actinomycetales":208.0,"k__Bacteria;p__Actinobacteria;c__Actinobacteria;o__Bifidobacteriales":0.0,"k__Bacteria;p__Actinobacteria;c__Actinobacteria;o__WCHB1-81":15.0,"k__Bacteria;p__Actinobacteria;c__Coriobacteriia;o__Coriobacteriales":0.0,"k__Bacteria;p__Armatimonadetes;c__SJA-176;o__GAB-B06":8.0,"k__Bacteria;p__Bacteroidetes;__;__":8.0,"k__Bacteria;p__Bacteroidetes;c__Bacteroidia;o__Bacteroidales":2446.0,"k__Bacteria;p__Bacteroidetes;c__Flavobacteriia;o__Flavobacteriales":0.0,"k__Bacteria;p__Bacteroidetes;c__Sphingobacteriia;o__Sphingobacteriales":0.0,"k__Bacteria;p__Bacteroidetes;c__[Saprospirae];o__[Saprospirales]":33.0,"k__Bacteria;p__Caldiserica;c__OP5;o__WCHB1-02":17.0,"k__Bacteria;p__Caldiserica;c__TTA-B1;o__":14.0,"k__Bacteria;p__Chlorobi;c__Ignavibacteria;o__Ignavibacteriales":0.0,"k__Bacteria;p__Chlorobi;c__SJA-28;o__":16.0,"k__Bacteria;p__Chloroflexi;c__;o__":6.0,"k__Bacteria;p__Chloroflexi;c__Anaerolineae;o__Anaerolineales":227.0,"k__Bacteria;p__Chloroflexi;c__Anaerolineae;o__Caldilineales":35.0,"k__Bacteria;p__Chloroflexi;c__Anaerolineae;o__OPB11":15.0,"k__Bacteria;p__Chloroflexi;c__Anaerolineae;o__SBR1031":8.0,"k__Bacteria;p__Chloroflexi;c__Anaerolineae;o__SHA-20":147.0,"k__Bacteria;p__Chloroflexi;c__Dehalococcoidetes;o__Dehalococcoidales":0.0,"k__Bacteria;p__Chloroflexi;c__Ellin6529;o__":3.0,"k__Bacteria;p__Chloroflexi;c__TK17;o__mle1-48":0.0,"k__Bacteria;p__Chloroflexi;c__Thermomicrobia;o__JG30-KF-CM45":0.0,"k__Bacteria;p__Cyanobacteria;c__Chloroplast;o__Streptophyta":0.0,"k__Bacteria;p__EM3;c__;o__":793.0,"k__Bacteria;p__Fibrobacteres;c__Fibrobacteria;o__Fibrobacterales":0.0,"k__Bacteria;p__Fibrobacteres;c__TG3;o__TG3-1":0.0,"k__Bacteria;p__Firmicutes;c__Bacilli;__":0.0,"k__Bacteria;p__Firmicutes;c__Bacilli;o__Bacillales":0.0,"k__Bacteria;p__Firmicutes;c__Bacilli;o__Haloplasmatales":0.0,"k__Bacteria;p__Firmicutes;c__Bacilli;o__Lactobacillales":45.0,"k__Bacteria;p__Firmicutes;c__Bacilli;o__Turicibacterales":12.0,"k__Bacteria;p__Firmicutes;c__Clostridia;__":10.0,"k__Bacteria;p__Firmicutes;c__Clostridia;o__":4.0,"k__Bacteria;p__Firmicutes;c__Clostridia;o__BSA2B-08":0.0,"k__Bacteria;p__Firmicutes;c__Clostridia;o__Clostridiales":2914.0,"k__Bacteria;p__Firmicutes;c__Clostridia;o__Halanaerobiales":0.0,"k__Bacteria;p__Firmicutes;c__Clostridia;o__MBA08":63.0,"k__Bacteria;p__Firmicutes;c__Clostridia;o__Natranaerobiales":12.0,"k__Bacteria;p__Firmicutes;c__Clostridia;o__OPB54":4.0,"k__Bacteria;p__Firmicutes;c__Clostridia;o__SHA-98":998.0,"k__Bacteria;p__Firmicutes;c__Clostridia;o__Thermoanaerobacterales":13.0,"k__Bacteria;p__Firmicutes;c__Erysipelotrichi;o__Erysipelotrichales":0.0,"k__Bacteria;p__Firmicutes;c__OPB54;o__":0.0,"k__Bacteria;p__NKB19;c__noFP_H4;o__":0.0,"k__Bacteria;p__OD1;c__;o__":313.0,"k__Bacteria;p__OD1;c__ABY1;o__":0.0,"k__Bacteria;p__OP1;c__OPB14;o__":20.0,"k__Bacteria;p__OP8;c__OP8_1;o__OPB95":304.0,"k__Bacteria;p__OP9;c__JS1;o__BA021":5.0,"k__Bacteria;p__OP9;c__OPB46;o__OPB72":50.0,"k__Bacteria;p__OP9;c__OPB46;o__SHA-1":30.0,"k__Bacteria;p__Proteobacteria;c__Alphaproteobacteria;__":0.0,"k__Bacteria;p__Proteobacteria;c__Alphaproteobacteria;o__Rhizobiales":0.0,"k__Bacteria;p__Proteobacteria;c__Alphaproteobacteria;o__Rhodobacterales":0.0,"k__Bacteria;p__Proteobacteria;c__Alphaproteobacteria;o__Rhodospirillales":8.0,"k__Bacteria;p__Proteobacteria;c__Alphaproteobacteria;o__Sphingomonadales":15.0,"k__Bacteria;p__Proteobacteria;c__Betaproteobacteria;__":31.0,"k__Bacteria;p__Proteobacteria;c__Betaproteobacteria;o__Burkholderiales":74.0,"k__Bacteria;p__Proteobacteria;c__Betaproteobacteria;o__Thiobacterales":15.0,"k__Bacteria;p__Proteobacteria;c__Deltaproteobacteria;__":0.0,"k__Bacteria;p__Proteobacteria;c__Deltaproteobacteria;o__":15.0,"k__Bacteria;p__Proteobacteria;c__Deltaproteobacteria;o__Syntrophobacterales":82.0,"k__Bacteria;p__Proteobacteria;c__Epsilonproteobacteria;o__Campylobacterales":14.0,"k__Bacteria;p__Proteobacteria;c__Gammaproteobacteria;__":0.0,"k__Bacteria;p__Proteobacteria;c__Gammaproteobacteria;o__Aeromonadales":36.0,"k__Bacteria;p__Proteobacteria;c__Gammaproteobacteria;o__Pseudomonadales":12.0,"k__Bacteria;p__Proteobacteria;c__Gammaproteobacteria;o__Xanthomonadales":55.0,"k__Bacteria;p__SAR406;c__AB16;o__noFP_H7":8.0,"k__Bacteria;p__SR1;c__;o__":0.0,"k__Bacteria;p__Spirochaetes;c__MVP-15;o__PL-11B10":0.0,"k__Bacteria;p__Spirochaetes;c__Spirochaetes;o__Sphaerochaetales":0.0,"k__Bacteria;p__Spirochaetes;c__Spirochaetes;o__Spirochaetales":470.0,"k__Bacteria;p__Spirochaetes;c__[Leptospirae];o__[Leptospirales]":31.0,"k__Bacteria;p__Synergistetes;c__Synergistia;o__Synergistales":168.0,"k__Bacteria;p__TA06;c__;o__":5.0,"k__Bacteria;p__TM7;c__TM7-1;o__":31.0,"k__Bacteria;p__TM7;c__TM7-3;__":19.0,"k__Bacteria;p__TM7;c__TM7-3;o__":61.0,"k__Bacteria;p__TM7;c__TM7-3;o__CW040":0.0,"k__Bacteria;p__TM7;c__TM7-3;o__I025":30.0,"k__Bacteria;p__Tenericutes;c__Mollicutes;o__":0.0,"k__Bacteria;p__Tenericutes;c__Mollicutes;o__Acholeplasmatales":0.0,"k__Bacteria;p__Tenericutes;c__Mollicutes;o__RF39":0.0,"k__Bacteria;p__Tenericutes;c__RF3;o__ML615J-28":4.0,"k__Bacteria;p__Thermotogae;c__Thermotogae;o__Thermotogales":225.0,"k__Bacteria;p__Verrucomicrobia;c__Verruco-5;o__LD1-PB3":0.0,"k__Bacteria;p__Verrucomicrobia;c__[Pedosphaerae];o__[Pedosphaerales]":0.0,"k__Bacteria;p__WPS-2;c__;o__":4.0,"k__Bacteria;p__WS6;c__SC72;o__A-2AF":28.0,"k__Bacteria;p__WS6;c__SC72;o__WCHB1-15":0.0,"k__Bacteria;p__WWE1;c__[Cloacamonae];o__[Cloacamonales]":2349.0,"plant type":"SSD","plant no.":"#14"},{"index":"15_U341F-U806R-NW3-13","k__Archaea;p__Crenarchaeota;c__MCG;o__pGrfC26":0.0,"k__Archaea;p__Euryarchaeota;c__Methanobacteria;o__Methanobacteriales":14.0,"k__Archaea;p__Euryarchaeota;c__Methanomicrobia;o__Methanomicrobiales":0.0,"k__Archaea;p__Euryarchaeota;c__Methanomicrobia;o__Methanosarcinales":294.0,"k__Archaea;p__Euryarchaeota;c__Thermoplasmata;o__E2":0.0,"k__Archaea;p__[Parvarchaeota];c__[Parvarchaea];o__WCHD3-30":5.0,"k__Bacteria;__;__;__":0.0,"k__Bacteria;p__;c__;o__":16.0,"k__Bacteria;p__Acidobacteria;c__BPC102;o__MVS-40":0.0,"k__Bacteria;p__Acidobacteria;c__Solibacteres;o__Solibacterales":0.0,"k__Bacteria;p__Acidobacteria;c__[Chloracidobacteria];o__RB41":14.0,"k__Bacteria;p__Actinobacteria;c__;o__":0.0,"k__Bacteria;p__Actinobacteria;c__Acidimicrobiia;o__Acidimicrobiales":110.0,"k__Bacteria;p__Actinobacteria;c__Actinobacteria;o__Actinomycetales":888.0,"k__Bacteria;p__Actinobacteria;c__Actinobacteria;o__Bifidobacteriales":0.0,"k__Bacteria;p__Actinobacteria;c__Actinobacteria;o__WCHB1-81":0.0,"k__Bacteria;p__Actinobacteria;c__Coriobacteriia;o__Coriobacteriales":0.0,"k__Bacteria;p__Armatimonadetes;c__SJA-176;o__GAB-B06":0.0,"k__Bacteria;p__Bacteroidetes;__;__":0.0,"k__Bacteria;p__Bacteroidetes;c__Bacteroidia;o__Bacteroidales":1496.0,"k__Bacteria;p__Bacteroidetes;c__Flavobacteriia;o__Flavobacteriales":11.0,"k__Bacteria;p__Bacteroidetes;c__Sphingobacteriia;o__Sphingobacteriales":0.0,"k__Bacteria;p__Bacteroidetes;c__[Saprospirae];o__[Saprospirales]":20.0,"k__Bacteria;p__Caldiserica;c__OP5;o__WCHB1-02":0.0,"k__Bacteria;p__Caldiserica;c__TTA-B1;o__":0.0,"k__Bacteria;p__Chlorobi;c__Ignavibacteria;o__Ignavibacteriales":33.0,"k__Bacteria;p__Chlorobi;c__SJA-28;o__":0.0,"k__Bacteria;p__Chloroflexi;c__;o__":0.0,"k__Bacteria;p__Chloroflexi;c__Anaerolineae;o__Anaerolineales":124.0,"k__Bacteria;p__Chloroflexi;c__Anaerolineae;o__Caldilineales":9.0,"k__Bacteria;p__Chloroflexi;c__Anaerolineae;o__OPB11":0.0,"k__Bacteria;p__Chloroflexi;c__Anaerolineae;o__SBR1031":0.0,"k__Bacteria;p__Chloroflexi;c__Anaerolineae;o__SHA-20":11.0,"k__Bacteria;p__Chloroflexi;c__Dehalococcoidetes;o__Dehalococcoidales":0.0,"k__Bacteria;p__Chloroflexi;c__Ellin6529;o__":0.0,"k__Bacteria;p__Chloroflexi;c__TK17;o__mle1-48":4.0,"k__Bacteria;p__Chloroflexi;c__Thermomicrobia;o__JG30-KF-CM45":28.0,"k__Bacteria;p__Cyanobacteria;c__Chloroplast;o__Streptophyta":0.0,"k__Bacteria;p__EM3;c__;o__":0.0,"k__Bacteria;p__Fibrobacteres;c__Fibrobacteria;o__Fibrobacterales":0.0,"k__Bacteria;p__Fibrobacteres;c__TG3;o__TG3-1":0.0,"k__Bacteria;p__Firmicutes;c__Bacilli;__":0.0,"k__Bacteria;p__Firmicutes;c__Bacilli;o__Bacillales":0.0,"k__Bacteria;p__Firmicutes;c__Bacilli;o__Haloplasmatales":0.0,"k__Bacteria;p__Firmicutes;c__Bacilli;o__Lactobacillales":14.0,"k__Bacteria;p__Firmicutes;c__Bacilli;o__Turicibacterales":0.0,"k__Bacteria;p__Firmicutes;c__Clostridia;__":0.0,"k__Bacteria;p__Firmicutes;c__Clostridia;o__":0.0,"k__Bacteria;p__Firmicutes;c__Clostridia;o__BSA2B-08":0.0,"k__Bacteria;p__Firmicutes;c__Clostridia;o__Clostridiales":1281.0,"k__Bacteria;p__Firmicutes;c__Clostridia;o__Halanaerobiales":0.0,"k__Bacteria;p__Firmicutes;c__Clostridia;o__MBA08":18.0,"k__Bacteria;p__Firmicutes;c__Clostridia;o__Natranaerobiales":0.0,"k__Bacteria;p__Firmicutes;c__Clostridia;o__OPB54":0.0,"k__Bacteria;p__Firmicutes;c__Clostridia;o__SHA-98":62.0,"k__Bacteria;p__Firmicutes;c__Clostridia;o__Thermoanaerobacterales":0.0,"k__Bacteria;p__Firmicutes;c__Erysipelotrichi;o__Erysipelotrichales":0.0,"k__Bacteria;p__Firmicutes;c__OPB54;o__":0.0,"k__Bacteria;p__NKB19;c__noFP_H4;o__":11.0,"k__Bacteria;p__OD1;c__;o__":0.0,"k__Bacteria;p__OD1;c__ABY1;o__":0.0,"k__Bacteria;p__OP1;c__OPB14;o__":0.0,"k__Bacteria;p__OP8;c__OP8_1;o__OPB95":0.0,"k__Bacteria;p__OP9;c__JS1;o__BA021":10.0,"k__Bacteria;p__OP9;c__OPB46;o__OPB72":0.0,"k__Bacteria;p__OP9;c__OPB46;o__SHA-1":19.0,"k__Bacteria;p__Proteobacteria;c__Alphaproteobacteria;__":0.0,"k__Bacteria;p__Proteobacteria;c__Alphaproteobacteria;o__Rhizobiales":28.0,"k__Bacteria;p__Proteobacteria;c__Alphaproteobacteria;o__Rhodobacterales":30.0,"k__Bacteria;p__Proteobacteria;c__Alphaproteobacteria;o__Rhodospirillales":0.0,"k__Bacteria;p__Proteobacteria;c__Alphaproteobacteria;o__Sphingomonadales":0.0,"k__Bacteria;p__Proteobacteria;c__Betaproteobacteria;__":0.0,"k__Bacteria;p__Proteobacteria;c__Betaproteobacteria;o__Burkholderiales":5.0,"k__Bacteria;p__Proteobacteria;c__Betaproteobacteria;o__Thiobacterales":0.0,"k__Bacteria;p__Proteobacteria;c__Deltaproteobacteria;__":0.0,"k__Bacteria;p__Proteobacteria;c__Deltaproteobacteria;o__":0.0,"k__Bacteria;p__Proteobacteria;c__Deltaproteobacteria;o__Syntrophobacterales":8.0,"k__Bacteria;p__Proteobacteria;c__Epsilonproteobacteria;o__Campylobacterales":0.0,"k__Bacteria;p__Proteobacteria;c__Gammaproteobacteria;__":0.0,"k__Bacteria;p__Proteobacteria;c__Gammaproteobacteria;o__Aeromonadales":0.0,"k__Bacteria;p__Proteobacteria;c__Gammaproteobacteria;o__Pseudomonadales":0.0,"k__Bacteria;p__Proteobacteria;c__Gammaproteobacteria;o__Xanthomonadales":12.0,"k__Bacteria;p__SAR406;c__AB16;o__noFP_H7":0.0,"k__Bacteria;p__SR1;c__;o__":260.0,"k__Bacteria;p__Spirochaetes;c__MVP-15;o__PL-11B10":0.0,"k__Bacteria;p__Spirochaetes;c__Spirochaetes;o__Sphaerochaetales":0.0,"k__Bacteria;p__Spirochaetes;c__Spirochaetes;o__Spirochaetales":0.0,"k__Bacteria;p__Spirochaetes;c__[Leptospirae];o__[Leptospirales]":5.0,"k__Bacteria;p__Synergistetes;c__Synergistia;o__Synergistales":549.0,"k__Bacteria;p__TA06;c__;o__":0.0,"k__Bacteria;p__TM7;c__TM7-1;o__":44.0,"k__Bacteria;p__TM7;c__TM7-3;__":9.0,"k__Bacteria;p__TM7;c__TM7-3;o__":0.0,"k__Bacteria;p__TM7;c__TM7-3;o__CW040":0.0,"k__Bacteria;p__TM7;c__TM7-3;o__I025":0.0,"k__Bacteria;p__Tenericutes;c__Mollicutes;o__":0.0,"k__Bacteria;p__Tenericutes;c__Mollicutes;o__Acholeplasmatales":4.0,"k__Bacteria;p__Tenericutes;c__Mollicutes;o__RF39":0.0,"k__Bacteria;p__Tenericutes;c__RF3;o__ML615J-28":0.0,"k__Bacteria;p__Thermotogae;c__Thermotogae;o__Thermotogales":0.0,"k__Bacteria;p__Verrucomicrobia;c__Verruco-5;o__LD1-PB3":0.0,"k__Bacteria;p__Verrucomicrobia;c__[Pedosphaerae];o__[Pedosphaerales]":0.0,"k__Bacteria;p__WPS-2;c__;o__":0.0,"k__Bacteria;p__WS6;c__SC72;o__A-2AF":0.0,"k__Bacteria;p__WS6;c__SC72;o__WCHB1-15":0.0,"k__Bacteria;p__WWE1;c__[Cloacamonae];o__[Cloacamonales]":28.0,"plant type":"SSD","plant no.":"#15"}]);
