# Supplementary material for: Arsenic metabolism in technical biogas plants: possible consequences for resident microbiota and downstream units
Source: AMB Express. 2019 Nov 28;9:190. doi: 10.1186/s13568-019-0902-6 (PMC6882981; doi:10.1186/s13568-019-0902-6)
Supplement: Supplementary file 2 — Additional file 2. Additional electronic material, which provides full dataset of Figure 1 (Qiime2 files). [file 13568_2019_902_MOESM2_ESM.qzv › 41ab44e8-4670-4568-81db-98b188333850/data/level-5.csv]

index	k__Archaea;p__Crenarchaeota;c__MCG;o__pGrfC26;f__	k__Archaea;p__Euryarchaeota;c__Methanobacteria;o__Methanobacteriales;f__Methanobacteriaceae	k__Archaea;p__Euryarchaeota;c__Methanobacteria;o__Methanobacteriales;f__WSA2	k__Archaea;p__Euryarchaeota;c__Methanomicrobia;o__Methanomicrobiales;f__Methanomicrobiaceae	k__Archaea;p__Euryarchaeota;c__Methanomicrobia;o__Methanomicrobiales;f__Methanoregulaceae	k__Archaea;p__Euryarchaeota;c__Methanomicrobia;o__Methanomicrobiales;f__Methanospirillaceae	k__Archaea;p__Euryarchaeota;c__Methanomicrobia;o__Methanosarcinales;f__Methanosaetaceae	k__Archaea;p__Euryarchaeota;c__Methanomicrobia;o__Methanosarcinales;f__Methanosarcinaceae	k__Archaea;p__Euryarchaeota;c__Thermoplasmata;o__E2;f__[Methanomassiliicoccaceae]	k__Archaea;p__[Parvarchaeota];c__[Parvarchaea];o__WCHD3-30;f__	k__Bacteria;__;__;__;__	k__Bacteria;p__;c__;o__;f__	k__Bacteria;p__Acidobacteria;c__BPC102;o__MVS-40;f__	k__Bacteria;p__Acidobacteria;c__Solibacteres;o__Solibacterales;f__AKIW659	k__Bacteria;p__Acidobacteria;c__[Chloracidobacteria];o__RB41;f__Ellin6075	k__Bacteria;p__Actinobacteria;c__;o__;f__	k__Bacteria;p__Actinobacteria;c__Acidimicrobiia;o__Acidimicrobiales;f__	k__Bacteria;p__Actinobacteria;c__Acidimicrobiia;o__Acidimicrobiales;f__C111	k__Bacteria;p__Actinobacteria;c__Acidimicrobiia;o__Acidimicrobiales;f__Microthrixaceae	k__Bacteria;p__Actinobacteria;c__Actinobacteria;o__Actinomycetales;__	k__Bacteria;p__Actinobacteria;c__Actinobacteria;o__Actinomycetales;f__Corynebacteriaceae	k__Bacteria;p__Actinobacteria;c__Actinobacteria;o__Actinomycetales;f__Dermatophilaceae	k__Bacteria;p__Actinobacteria;c__Actinobacteria;o__Actinomycetales;f__Intrasporangiaceae	k__Bacteria;p__Actinobacteria;c__Actinobacteria;o__Actinomycetales;f__Microbacteriaceae	k__Bacteria;p__Actinobacteria;c__Actinobacteria;o__Actinomycetales;f__Nocardioidaceae	k__Bacteria;p__Actinobacteria;c__Actinobacteria;o__Actinomycetales;f__Nocardiopsaceae	k__Bacteria;p__Actinobacteria;c__Actinobacteria;o__Actinomycetales;f__Pseudonocardiaceae	k__Bacteria;p__Actinobacteria;c__Actinobacteria;o__Actinomycetales;f__Streptomycetaceae	k__Bacteria;p__Actinobacteria;c__Actinobacteria;o__Bifidobacteriales;f__Bifidobacteriaceae	k__Bacteria;p__Actinobacteria;c__Actinobacteria;o__WCHB1-81;f__At425_EubF1	k__Bacteria;p__Actinobacteria;c__Coriobacteriia;o__Coriobacteriales;f__Coriobacteriaceae	k__Bacteria;p__Armatimonadetes;c__SJA-176;o__GAB-B06;f__	k__Bacteria;p__Bacteroidetes;__;__;__	k__Bacteria;p__Bacteroidetes;c__Bacteroidia;o__Bacteroidales;__	k__Bacteria;p__Bacteroidetes;c__Bacteroidia;o__Bacteroidales;f__	k__Bacteria;p__Bacteroidetes;c__Bacteroidia;o__Bacteroidales;f__Bacteroidaceae	k__Bacteria;p__Bacteroidetes;c__Bacteroidia;o__Bacteroidales;f__Marinilabiaceae	k__Bacteria;p__Bacteroidetes;c__Bacteroidia;o__Bacteroidales;f__Porphyromonadaceae	k__Bacteria;p__Bacteroidetes;c__Bacteroidia;o__Bacteroidales;f__Prevotellaceae	k__Bacteria;p__Bacteroidetes;c__Bacteroidia;o__Bacteroidales;f__Rikenellaceae	k__Bacteria;p__Bacteroidetes;c__Flavobacteriia;o__Flavobacteriales;f__Flavobacteriaceae	k__Bacteria;p__Bacteroidetes;c__Sphingobacteriia;o__Sphingobacteriales;f__Sphingobacteriaceae	k__Bacteria;p__Bacteroidetes;c__[Saprospirae];o__[Saprospirales];f__Chitinophagaceae	k__Bacteria;p__Bacteroidetes;c__[Saprospirae];o__[Saprospirales];f__Saprospiraceae	k__Bacteria;p__Caldiserica;c__OP5;o__WCHB1-02;f__SHBZ1169	k__Bacteria;p__Caldiserica;c__TTA-B1;o__;f__	k__Bacteria;p__Chlorobi;c__Ignavibacteria;o__Ignavibacteriales;f__Ignavibacteriaceae	k__Bacteria;p__Chlorobi;c__SJA-28;o__;f__	k__Bacteria;p__Chloroflexi;c__;o__;f__
01_U341F-U806R-NW3-1	0.0	0.0	0.0	0.0	0.0	0.0	0.0	97.0	0.0	0.0	0.0	35.0	0.0	0.0	0.0	0.0	0.0	0.0	0.0	0.0	9.0	0.0	0.0	0.0	0.0	0.0	0.0	0.0	0.0	0.0	0.0	0.0	117.0	46.0	155.0	82.0	23.0	9.0	0.0	0.0	0.0	0.0	0.0	0.0	0.0	0.0	0.0	0.0	0.0
02_U341F-U806R-NW3-2	22.0	13.0	11.0	0.0	0.0	0.0	295.0	0.0	0.0	0.0	191.0	169.0	54.0	0.0	0.0	0.0	0.0	0.0	0.0	0.0	51.0	0.0	0.0	0.0	0.0	0.0	0.0	0.0	38.0	0.0	62.0	0.0	7.0	0.0	1659.0	833.0	247.0	110.0	15.0	0.0	0.0	0.0	0.0	0.0	0.0	0.0	0.0	0.0	0.0
03_U341F-U806R-NW3-3	0.0	0.0	0.0	0.0	0.0	0.0	0.0	1456.0	0.0	0.0	8.0	213.0	0.0	0.0	0.0	0.0	0.0	0.0	0.0	0.0	0.0	0.0	0.0	0.0	0.0	0.0	0.0	0.0	0.0	0.0	0.0	0.0	133.0	610.0	92.0	125.0	70.0	145.0	0.0	0.0	0.0	7.0	0.0	0.0	0.0	0.0	0.0	0.0	0.0
04_U341F-U806R-NW3-4	0.0	66.0	0.0	0.0	0.0	0.0	0.0	37.0	0.0	0.0	118.0	372.0	0.0	0.0	0.0	0.0	0.0	0.0	0.0	0.0	0.0	0.0	0.0	0.0	0.0	0.0	0.0	0.0	102.0	0.0	13.0	0.0	1788.0	253.0	1003.0	329.0	8.0	664.0	0.0	0.0	0.0	0.0	0.0	0.0	0.0	0.0	0.0	0.0	0.0
05_U341F-U806R-NW3-5	0.0	0.0	0.0	0.0	0.0	0.0	0.0	0.0	0.0	0.0	52.0	28.0	0.0	0.0	0.0	0.0	0.0	0.0	0.0	0.0	0.0	0.0	0.0	0.0	0.0	0.0	0.0	0.0	0.0	0.0	0.0	0.0	181.0	31.0	69.0	43.0	15.0	75.0	0.0	0.0	0.0	0.0	0.0	0.0	0.0	0.0	0.0	0.0	0.0
06_U341F-U806R-NW3-6	13.0	3.0	5.0	0.0	0.0	0.0	1081.0	0.0	0.0	0.0	145.0	310.0	17.0	0.0	0.0	0.0	0.0	0.0	0.0	0.0	24.0	0.0	0.0	0.0	0.0	0.0	0.0	0.0	0.0	0.0	37.0	0.0	10.0	0.0	1339.0	757.0	167.0	158.0	0.0	0.0	0.0	0.0	0.0	0.0	0.0	0.0	0.0	0.0	0.0
07_U341F-U806R-NW3-8	0.0	0.0	0.0	0.0	0.0	0.0	0.0	100.0	0.0	0.0	19.0	91.0	0.0	0.0	0.0	0.0	0.0	0.0	0.0	0.0	0.0	0.0	0.0	0.0	0.0	0.0	0.0	0.0	0.0	0.0	0.0	0.0	851.0	1655.0	62.0	8.0	32.0	17.0	0.0	0.0	0.0	0.0	0.0	0.0	0.0	0.0	0.0	0.0	0.0
08_U341F-U806R-NW3-9	0.0	0.0	0.0	0.0	0.0	0.0	0.0	0.0	0.0	0.0	0.0	76.0	0.0	0.0	0.0	0.0	0.0	0.0	0.0	0.0	0.0	0.0	0.0	0.0	0.0	0.0	0.0	0.0	0.0	0.0	0.0	0.0	298.0	49.0	34.0	0.0	13.0	9.0	0.0	0.0	0.0	0.0	0.0	0.0	0.0	0.0	0.0	0.0	0.0
09_U341F-U806R-NW3-10	8.0	51.0	0.0	0.0	0.0	0.0	229.0	489.0	0.0	0.0	68.0	208.0	54.0	0.0	0.0	0.0	0.0	0.0	0.0	0.0	30.0	0.0	0.0	0.0	0.0	0.0	0.0	0.0	0.0	0.0	48.0	0.0	0.0	4.0	2205.0	1047.0	650.0	209.0	0.0	0.0	0.0	0.0	0.0	0.0	0.0	0.0	0.0	0.0	0.0
10_U341F-U806R-NW3-11	0.0	81.0	0.0	0.0	0.0	0.0	0.0	0.0	0.0	0.0	20.0	442.0	0.0	0.0	0.0	0.0	0.0	0.0	0.0	0.0	0.0	0.0	0.0	0.0	0.0	0.0	0.0	0.0	0.0	0.0	0.0	0.0	885.0	217.0	192.0	0.0	0.0	15.0	0.0	0.0	0.0	0.0	0.0	0.0	0.0	0.0	0.0	0.0	0.0
11_U341F-U806R-NW3-12	0.0	0.0	0.0	11.0	0.0	0.0	18.0	0.0	6.0	0.0	126.0	266.0	19.0	0.0	0.0	0.0	0.0	0.0	0.0	0.0	0.0	0.0	0.0	0.0	0.0	0.0	0.0	0.0	0.0	0.0	0.0	0.0	226.0	351.0	193.0	265.0	61.0	322.0	0.0	0.0	0.0	0.0	0.0	0.0	0.0	0.0	0.0	0.0	0.0
12_U341F-U806R-NW3-14	0.0	15.0	0.0	13.0	0.0	0.0	0.0	12.0	0.0	0.0	21.0	247.0	0.0	0.0	0.0	0.0	0.0	0.0	0.0	0.0	0.0	0.0	0.0	0.0	0.0	0.0	0.0	0.0	0.0	0.0	0.0	0.0	307.0	1857.0	297.0	0.0	134.0	70.0	0.0	0.0	0.0	0.0	0.0	0.0	0.0	0.0	0.0	0.0	0.0
13_U341F-U806R-NW3-15	0.0	10.0	0.0	24.0	0.0	0.0	0.0	583.0	4.0	0.0	34.0	451.0	0.0	0.0	0.0	0.0	0.0	0.0	0.0	0.0	0.0	0.0	0.0	0.0	0.0	17.0	18.0	0.0	0.0	0.0	0.0	0.0	822.0	311.0	394.0	76.0	0.0	70.0	0.0	0.0	0.0	0.0	0.0	0.0	0.0	0.0	0.0	0.0	0.0
14_U341F-U806R-NW3-7	0.0	0.0	13.0	0.0	69.0	25.0	697.0	0.0	0.0	0.0	224.0	905.0	10.0	9.0	0.0	16.0	24.0	78.0	10.0	23.0	0.0	0.0	164.0	10.0	0.0	0.0	0.0	11.0	0.0	15.0	0.0	8.0	8.0	66.0	1772.0	0.0	10.0	250.0	0.0	348.0	0.0	0.0	16.0	17.0	17.0	14.0	0.0	16.0	6.0
15_U341F-U806R-NW3-13	0.0	0.0	14.0	0.0	0.0	0.0	294.0	0.0	0.0	5.0	0.0	16.0	0.0	0.0	14.0	0.0	0.0	16.0	94.0	0.0	0.0	153.0	703.0	0.0	32.0	0.0	0.0	0.0	0.0	0.0	0.0	0.0	0.0	42.0	1454.0	0.0	0.0	0.0	0.0	0.0	11.0	0.0	9.0	11.0	0.0	0.0	33.0	0.0	0.0
[truncated: 126 more columns]
