# Supplementary material for: Arsenic metabolism in technical biogas plants: possible consequences for resident microbiota and downstream units
Source: AMB Express. 2019 Nov 28;9:190. doi: 10.1186/s13568-019-0902-6 (PMC6882981; doi:10.1186/s13568-019-0902-6)
Supplement: Supplementary file 2 — Additional file 2. Additional electronic material, which provides full dataset of Figure 1 (Qiime2 files). [file 13568_2019_902_MOESM2_ESM.qzv › 41ab44e8-4670-4568-81db-98b188333850/data/level-5.jsonp]

load_data(5,["k__Archaea;p__Crenarchaeota;c__MCG;o__pGrfC26;f__", "k__Archaea;p__Euryarchaeota;c__Methanobacteria;o__Methanobacteriales;f__Methanobacteriaceae", "k__Archaea;p__Euryarchaeota;c__Methanobacteria;o__Methanobacteriales;f__WSA2", "k__Archaea;p__Euryarchaeota;c__Methanomicrobia;o__Methanomicrobiales;f__Methanomicrobiaceae", "k__Archaea;p__Euryarchaeota;c__Methanomicrobia;o__Methanomicrobiales;f__Methanoregulaceae", "k__Archaea;p__Euryarchaeota;c__Methanomicrobia;o__Methanomicrobiales;f__Methanospirillaceae", "k__Archaea;p__Euryarchaeota;c__Methanomicrobia;o__Methanosarcinales;f__Methanosaetaceae", "k__Archaea;p__Euryarchaeota;c__Methanomicrobia;o__Methanosarcinales;f__Methanosarcinaceae", "k__Archaea;p__Euryarchaeota;c__Thermoplasmata;o__E2;f__[Methanomassiliicoccaceae]", "k__Archaea;p__[Parvarchaeota];c__[Parvarchaea];o__WCHD3-30;f__", "k__Bacteria;__;__;__;__", "k__Bacteria;p__;c__;o__;f__", "k__Bacteria;p__Acidobacteria;c__BPC102;o__MVS-40;f__", "k__Bacteria;p__Acidobacteria;c__Solibacteres;o__Solibacterales;f__AKIW659", "k__Bacteria;p__Acidobacteria;c__[Chloracidobacteria];o__RB41;f__Ellin6075", "k__Bacteria;p__Actinobacteria;c__;o__;f__", "k__Bacteria;p__Actinobacteria;c__Acidimicrobiia;o__Acidimicrobiales;f__", "k__Bacteria;p__Actinobacteria;c__Acidimicrobiia;o__Acidimicrobiales;f__C111", "k__Bacteria;p__Actinobacteria;c__Acidimicrobiia;o__Acidimicrobiales;f__Microthrixaceae", "k__Bacteria;p__Actinobacteria;c__Actinobacteria;o__Actinomycetales;__", "k__Bacteria;p__Actinobacteria;c__Actinobacteria;o__Actinomycetales;f__Corynebacteriaceae", "k__Bacteria;p__Actinobacteria;c__Actinobacteria;o__Actinomycetales;f__Dermatophilaceae", "k__Bacteria;p__Actinobacteria;c__Actinobacteria;o__Actinomycetales;f__Intrasporangiaceae", "k__Bacteria;p__Actinobacteria;c__Actinobacteria;o__Actinomycetales;f__Microbacteriaceae", "k__Bacteria;p__Actinobacteria;c__Actinobacteria;o__Actinomycetales;f__Nocardioidaceae", "k__Bacteria;p__Actinobacteria;c__Actinobacteria;o__Actinomycetales;f__Nocardiopsaceae", "k__Bacteria;p__Actinobacteria;c__Actinobacteria;o__Actinomycetales;f__Pseudonocardiaceae", "k__Bacteria;p__Actinobacteria;c__Actinobacteria;o__Actinomycetales;f__Streptomycetaceae", "k__Bacteria;p__Actinobacteria;c__Actinobacteria;o__Bifidobacteriales;f__Bifidobacteriaceae", "k__Bacteria;p__Actinobacteria;c__Actinobacteria;o__WCHB1-81;f__At425_EubF1", "k__Bacteria;p__Actinobacteria;c__Coriobacteriia;o__Coriobacteriales;f__Coriobacteriaceae", "k__Bacteria;p__Armatimonadetes;c__SJA-176;o__GAB-B06;f__", "k__Bacteria;p__Bacteroidetes;__;__;__", "k__Bacteria;p__Bacteroidetes;c__Bacteroidia;o__Bacteroidales;__", "k__Bacteria;p__Bacteroidetes;c__Bacteroidia;o__Bacteroidales;f__", "k__Bacteria;p__Bacteroidetes;c__Bacteroidia;o__Bacteroidales;f__Bacteroidaceae", "k__Bacteria;p__Bacteroidetes;c__Bacteroidia;o__Bacteroidales;f__Marinilabiaceae", "k__Bacteria;p__Bacteroidetes;c__Bacteroidia;o__Bacteroidales;f__Porphyromonadaceae", "k__Bacteria;p__Bacteroidetes;c__Bacteroidia;o__Bacteroidales;f__Prevotellaceae", "k__Bacteria;p__Bacteroidetes;c__Bacteroidia;o__Bacteroidales;f__Rikenellaceae", "k__Bacteria;p__Bacteroidetes;c__Flavobacteriia;o__Flavobacteriales;f__Flavobacteriaceae", "k__Bacteria;p__Bacteroidetes;c__Sphingobacteriia;o__Sphingobacteriales;f__Sphingobacteriaceae", "k__Bacteria;p__Bacteroidetes;c__[Saprospirae];o__[Saprospirales];f__Chitinophagaceae", "k__Bacteria;p__Bacteroidetes;c__[Saprospirae];o__[Saprospirales];f__Saprospiraceae", "k__Bacteria;p__Caldiserica;c__OP5;o__WCHB1-02;f__SHBZ1169", "k__Bacteria;p__Caldiserica;c__TTA-B1;o__;f__", "k__Bacteria;p__Chlorobi;c__Ignavibacteria;o__Ignavibacteriales;f__Ignavibacteriaceae", "k__Bacteria;p__Chlorobi;c__SJA-28;o__;f__", "k__Bacteria;p__Chloroflexi;c__;o__;f__", "k__Bacteria;p__Chloroflexi;c__Anaerolineae;o__Anaerolineales;f__Anaerolinaceae", "k__Bacteria;p__Chloroflexi;c__Anaerolineae;o__Caldilineales;f__Caldilineaceae", "k__Bacteria;p__Chloroflexi;c__Anaerolineae;o__OPB11;f__", "k__Bacteria;p__Chloroflexi;c__Anaerolineae;o__SBR1031;f__SHA-31", "k__Bacteria;p__Chloroflexi;c__Anaerolineae;o__SHA-20;f__", "k__Bacteria;p__Chloroflexi;c__Dehalococcoidetes;o__Dehalococcoidales;__", "k__Bacteria;p__Chloroflexi;c__Ellin6529;o__;f__", "k__Bacteria;p__Chloroflexi;c__TK17;o__mle1-48;f__", "k__Bacteria;p__Chloroflexi;c__Thermomicrobia;o__JG30-KF-CM45;f__", "k__Bacteria;p__Cyanobacteria;c__Chloroplast;o__Streptophyta;f__", "k__Bacteria;p__EM3;c__;o__;f__", "k__Bacteria;p__Fibrobacteres;c__Fibrobacteria;o__Fibrobacterales;f__", "k__Bacteria;p__Fibrobacteres;c__Fibrobacteria;o__Fibrobacterales;f__Fibrobacteraceae", "k__Bacteria;p__Fibrobacteres;c__TG3;o__TG3-1;f__TSCOR003-O20", "k__Bacteria;p__Firmicutes;c__Bacilli;__;__", "k__Bacteria;p__Firmicutes;c__Bacilli;o__Bacillales;__", "k__Bacteria;p__Firmicutes;c__Bacilli;o__Bacillales;f__Bacillaceae", "k__Bacteria;p__Firmicutes;c__Bacilli;o__Bacillales;f__Paenibacillaceae", "k__Bacteria;p__Firmicutes;c__Bacilli;o__Bacillales;f__Planococcaceae", "k__Bacteria;p__Firmicutes;c__Bacilli;o__Bacillales;f__Staphylococcaceae", "k__Bacteria;p__Firmicutes;c__Bacilli;o__Bacillales;f__Thermoactinomycetaceae", "k__Bacteria;p__Firmicutes;c__Bacilli;o__Haloplasmatales;f__Haloplasmataceae", "k__Bacteria;p__Firmicutes;c__Bacilli;o__Lactobacillales;f__Aerococcaceae", "k__Bacteria;p__Firmicutes;c__Bacilli;o__Lactobacillales;f__Carnobacteriaceae", "k__Bacteria;p__Firmicutes;c__Bacilli;o__Lactobacillales;f__Enterococcaceae", "k__Bacteria;p__Firmicutes;c__Bacilli;o__Lactobacillales;f__Lactobacillaceae", "k__Bacteria;p__Firmicutes;c__Bacilli;o__Lactobacillales;f__Leuconostocaceae", "k__Bacteria;p__Firmicutes;c__Bacilli;o__Lactobacillales;f__Streptococcaceae", "k__Bacteria;p__Firmicutes;c__Bacilli;o__Turicibacterales;f__Turicibacteraceae", "k__Bacteria;p__Firmicutes;c__Clostridia;__;__", "k__Bacteria;p__Firmicutes;c__Clostridia;o__;f__", "k__Bacteria;p__Firmicutes;c__Clostridia;o__BSA2B-08;f__", "k__Bacteria;p__Firmicutes;c__Clostridia;o__Clostridiales;__", "k__Bacteria;p__Firmicutes;c__Clostridia;o__Clostridiales;f__", "k__Bacteria;p__Firmicutes;c__Clostridia;o__Clostridiales;f__Caldicoprobacteraceae", "k__Bacteria;p__Firmicutes;c__Clostridia;o__Clostridiales;f__Christensenellaceae", "k__Bacteria;p__Firmicutes;c__Clostridia;o__Clostridiales;f__Clostridiaceae", "k__Bacteria;p__Firmicutes;c__Clostridia;o__Clostridiales;f__Dehalobacteriaceae", "k__Bacteria;p__Firmicutes;c__Clostridia;o__Clostridiales;f__EtOH8", "k__Bacteria;p__Firmicutes;c__Clostridia;o__Clostridiales;f__Eubacteriaceae", "k__Bacteria;p__Firmicutes;c__Clostridia;o__Clostridiales;f__Gracilibacteraceae", "k__Bacteria;p__Firmicutes;c__Clostridia;o__Clostridiales;f__Lachnospiraceae", "k__Bacteria;p__Firmicutes;c__Clostridia;o__Clostridiales;f__Peptococcaceae", "k__Bacteria;p__Firmicutes;c__Clostridia;o__Clostridiales;f__Peptostreptococcaceae", "k__Bacteria;p__Firmicutes;c__Clostridia;o__Clostridiales;f__Ruminococcaceae", "k__Bacteria;p__Firmicutes;c__Clostridia;o__Clostridiales;f__Syntrophomonadaceae", "k__Bacteria;p__Firmicutes;c__Clostridia;o__Clostridiales;f__Veillonellaceae", "k__Bacteria;p__Firmicutes;c__Clostridia;o__Clostridiales;f__[Mogibacteriaceae]", "k__Bacteria;p__Firmicutes;c__Clostridia;o__Clostridiales;f__[Tissierellaceae]", "k__Bacteria;p__Firmicutes;c__Clostridia;o__Halanaerobiales;f__Halanaerobiaceae", "k__Bacteria;p__Firmicutes;c__Clostridia;o__MBA08;f__", "k__Bacteria;p__Firmicutes;c__Clostridia;o__Natranaerobiales;f__", "k__Bacteria;p__Firmicutes;c__Clostridia;o__Natranaerobiales;f__Anaerobrancaceae", "k__Bacteria;p__Firmicutes;c__Clostridia;o__Natranaerobiales;f__ML1228J-1", "k__Bacteria;p__Firmicutes;c__Clostridia;o__Natranaerobiales;f__YAB3B13", "k__Bacteria;p__Firmicutes;c__Clostridia;o__OPB54;f__", "k__Bacteria;p__Firmicutes;c__Clostridia;o__SHA-98;f__", "k__Bacteria;p__Firmicutes;c__Clostridia;o__SHA-98;f__D2", "k__Bacteria;p__Firmicutes;c__Clostridia;o__Thermoanaerobacterales;f__", "k__Bacteria;p__Firmicutes;c__Clostridia;o__Thermoanaerobacterales;f__Thermoanaerobacteraceae", "k__Bacteria;p__Firmicutes;c__Clostridia;o__Thermoanaerobacterales;f__Thermodesulfobiaceae", "k__Bacteria;p__Firmicutes;c__Erysipelotrichi;o__Erysipelotrichales;f__Erysipelotrichaceae", "k__Bacteria;p__Firmicutes;c__OPB54;o__;f__", "k__Bacteria;p__NKB19;c__noFP_H4;o__;f__", "k__Bacteria;p__OD1;c__;o__;f__", "k__Bacteria;p__OD1;c__ABY1;o__;f__", "k__Bacteria;p__OP1;c__OPB14;o__;f__", "k__Bacteria;p__OP8;c__OP8_1;o__OPB95;f__", "k__Bacteria;p__OP9;c__JS1;o__BA021;f__", "k__Bacteria;p__OP9;c__OPB46;o__OPB72;f__TIBD11", "k__Bacteria;p__OP9;c__OPB46;o__SHA-1;f__", "k__Bacteria;p__Proteobacteria;c__Alphaproteobacteria;__;__", "k__Bacteria;p__Proteobacteria;c__Alphaproteobacteria;o__Rhizobiales;f__Hyphomicrobiaceae", "k__Bacteria;p__Proteobacteria;c__Alphaproteobacteria;o__Rhizobiales;f__Methylobacteriaceae", "k__Bacteria;p__Proteobacteria;c__Alphaproteobacteria;o__Rhizobiales;f__Methylocystaceae", "k__Bacteria;p__Proteobacteria;c__Alphaproteobacteria;o__Rhodobacterales;f__Rhodobacteraceae", "k__Bacteria;p__Proteobacteria;c__Alphaproteobacteria;o__Rhodospirillales;f__Rhodospirillaceae", "k__Bacteria;p__Proteobacteria;c__Alphaproteobacteria;o__Sphingomonadales;__", "k__Bacteria;p__Proteobacteria;c__Betaproteobacteria;__;__", "k__Bacteria;p__Proteobacteria;c__Betaproteobacteria;o__Burkholderiales;f__Alcaligenaceae", "k__Bacteria;p__Proteobacteria;c__Betaproteobacteria;o__Burkholderiales;f__Burkholderiaceae", "k__Bacteria;p__Proteobacteria;c__Betaproteobacteria;o__Burkholderiales;f__Comamonadaceae", "k__Bacteria;p__Proteobacteria;c__Betaproteobacteria;o__Thiobacterales;f__Thiobacteraceae", "k__Bacteria;p__Proteobacteria;c__Deltaproteobacteria;__;__", "k__Bacteria;p__Proteobacteria;c__Deltaproteobacteria;o__;f__", "k__Bacteria;p__Proteobacteria;c__Deltaproteobacteria;o__Syntrophobacterales;f__Syntrophaceae", "k__Bacteria;p__Proteobacteria;c__Deltaproteobacteria;o__Syntrophobacterales;f__Syntrophorhabdaceae", "k__Bacteria;p__Proteobacteria;c__Epsilonproteobacteria;o__Campylobacterales;f__Campylobacteraceae", "k__Bacteria;p__Proteobacteria;c__Gammaproteobacteria;__;__", "k__Bacteria;p__Proteobacteria;c__Gammaproteobacteria;o__Aeromonadales;f__Aeromonadaceae", "k__Bacteria;p__Proteobacteria;c__Gammaproteobacteria;o__Aeromonadales;f__Succinivibrionaceae", "k__Bacteria;p__Proteobacteria;c__Gammaproteobacteria;o__Pseudomonadales;f__Moraxellaceae", "k__Bacteria;p__Proteobacteria;c__Gammaproteobacteria;o__Pseudomonadales;f__Pseudomonadaceae", "k__Bacteria;p__Proteobacteria;c__Gammaproteobacteria;o__Xanthomonadales;f__Xanthomonadaceae", "k__Bacteria;p__SAR406;c__AB16;o__noFP_H7;f__", "k__Bacteria;p__SR1;c__;o__;f__", "k__Bacteria;p__Spirochaetes;c__MVP-15;o__PL-11B10;f__", "k__Bacteria;p__Spirochaetes;c__Spirochaetes;o__Sphaerochaetales;f__Sphaerochaetaceae", "k__Bacteria;p__Spirochaetes;c__Spirochaetes;o__Spirochaetales;f__Spirochaetaceae", "k__Bacteria;p__Spirochaetes;c__[Leptospirae];o__[Leptospirales];f__Sediment-4", "k__Bacteria;p__Synergistetes;c__Synergistia;o__Synergistales;f__", "k__Bacteria;p__Synergistetes;c__Synergistia;o__Synergistales;f__Anaerobaculaceae", "k__Bacteria;p__Synergistetes;c__Synergistia;o__Synergistales;f__Dethiosulfovibrionaceae", "k__Bacteria;p__Synergistetes;c__Synergistia;o__Synergistales;f__Synergistaceae", "k__Bacteria;p__Synergistetes;c__Synergistia;o__Synergistales;f__Thermovirgaceae", "k__Bacteria;p__TA06;c__;o__;f__", "k__Bacteria;p__TM7;c__TM7-1;o__;f__", "k__Bacteria;p__TM7;c__TM7-3;__;__", "k__Bacteria;p__TM7;c__TM7-3;o__;f__", "k__Bacteria;p__TM7;c__TM7-3;o__CW040;f__F16", "k__Bacteria;p__TM7;c__TM7-3;o__I025;f__", "k__Bacteria;p__Tenericutes;c__Mollicutes;o__;f__", "k__Bacteria;p__Tenericutes;c__Mollicutes;o__Acholeplasmatales;f__Acholeplasmataceae", "k__Bacteria;p__Tenericutes;c__Mollicutes;o__RF39;f__", "k__Bacteria;p__Tenericutes;c__RF3;o__ML615J-28;f__", "k__Bacteria;p__Thermotogae;c__Thermotogae;o__Thermotogales;f__Thermotogaceae", "k__Bacteria;p__Verrucomicrobia;c__Verruco-5;o__LD1-PB3;f__", "k__Bacteria;p__Verrucomicrobia;c__[Pedosphaerae];o__[Pedosphaerales];f__R4-41B", "k__Bacteria;p__WPS-2;c__;o__;f__", "k__Bacteria;p__WS6;c__SC72;o__A-2AF;f__", "k__Bacteria;p__WS6;c__SC72;o__WCHB1-15;f__", "k__Bacteria;p__WWE1;c__[Cloacamonae];o__[Cloacamonales];f__", "k__Bacteria;p__WWE1;c__[Cloacamonae];o__[Cloacamonales];f__CW-1", "k__Bacteria;p__WWE1;c__[Cloacamonae];o__[Cloacamonales];f__[Cloacamonaceae]"],["index", "k__Archaea;p__Crenarchaeota;c__MCG;o__pGrfC26;f__", "k__Archaea;p__Euryarchaeota;c__Methanobacteria;o__Methanobacteriales;f__Methanobacteriaceae", "k__Archaea;p__Euryarchaeota;c__Methanobacteria;o__Methanobacteriales;f__WSA2", "k__Archaea;p__Euryarchaeota;c__Methanomicrobia;o__Methanomicrobiales;f__Methanomicrobiaceae", "k__Archaea;p__Euryarchaeota;c__Methanomicrobia;o__Methanomicrobiales;f__Methanoregulaceae", "k__Archaea;p__Euryarchaeota;c__Methanomicrobia;o__Methanomicrobiales;f__Methanospirillaceae", "k__Archaea;p__Euryarchaeota;c__Methanomicrobia;o__Methanosarcinales;f__Methanosaetaceae", "k__Archaea;p__Euryarchaeota;c__Methanomicrobia;o__Methanosarcinales;f__Methanosarcinaceae", "k__Archaea;p__Euryarchaeota;c__Thermoplasmata;o__E2;f__[Methanomassiliicoccaceae]", "k__Archaea;p__[Parvarchaeota];c__[Parvarchaea];o__WCHD3-30;f__", "k__Bacteria;__;__;__;__", "k__Bacteria;p__;c__;o__;f__", "k__Bacteria;p__Acidobacteria;c__BPC102;o__MVS-40;f__", "k__Bacteria;p__Acidobacteria;c__Solibacteres;o__Solibacterales;f__AKIW659", "k__Bacteria;p__Acidobacteria;c__[Chloracidobacteria];o__RB41;f__Ellin6075", "k__Bacteria;p__Actinobacteria;c__;o__;f__", "k__Bacteria;p__Actinobacteria;c__Acidimicrobiia;o__Acidimicrobiales;f__", "k__Bacteria;p__Actinobacteria;c__Acidimicrobiia;o__Acidimicrobiales;f__C111", "k__Bacteria;p__Actinobacteria;c__Acidimicrobiia;o__Acidimicrobiales;f__Microthrixaceae", "k__Bacteria;p__Actinobacteria;c__Actinobacteria;o__Actinomycetales;__", "k__Bacteria;p__Actinobacteria;c__Actinobacteria;o__Actinomycetales;f__Corynebacteriaceae", "k__Bacteria;p__Actinobacteria;c__Actinobacteria;o__Actinomycetales;f__Dermatophilaceae", "k__Bacteria;p__Actinobacteria;c__Actinobacteria;o__Actinomycetales;f__Intrasporangiaceae", "k__Bacteria;p__Actinobacteria;c__Actinobacteria;o__Actinomycetales;f__Microbacteriaceae", "k__Bacteria;p__Actinobacteria;c__Actinobacteria;o__Actinomycetales;f__Nocardioidaceae", "k__Bacteria;p__Actinobacteria;c__Actinobacteria;o__Actinomycetales;f__Nocardiopsaceae", "k__Bacteria;p__Actinobacteria;c__Actinobacteria;o__Actinomycetales;f__Pseudonocardiaceae", "k__Bacteria;p__Actinobacteria;c__Actinobacteria;o__Actinomycetales;f__Streptomycetaceae", "k__Bacteria;p__Actinobacteria;c__Actinobacteria;o__Bifidobacteriales;f__Bifidobacteriaceae", "k__Bacteria;p__Actinobacteria;c__Actinobacteria;o__WCHB1-81;f__At425_EubF1", "k__Bacteria;p__Actinobacteria;c__Coriobacteriia;o__Coriobacteriales;f__Coriobacteriaceae", "k__Bacteria;p__Armatimonadetes;c__SJA-176;o__GAB-B06;f__", "k__Bacteria;p__Bacteroidetes;__;__;__", "k__Bacteria;p__Bacteroidetes;c__Bacteroidia;o__Bacteroidales;__", "k__Bacteria;p__Bacteroidetes;c__Bacteroidia;o__Bacteroidales;f__", "k__Bacteria;p__Bacteroidetes;c__Bacteroidia;o__Bacteroidales;f__Bacteroidaceae", "k__Bacteria;p__Bacteroidetes;c__Bacteroidia;o__Bacteroidales;f__Marinilabiaceae", "k__Bacteria;p__Bacteroidetes;c__Bacteroidia;o__Bacteroidales;f__Porphyromonadaceae", "k__Bacteria;p__Bacteroidetes;c__Bacteroidia;o__Bacteroidales;f__Prevotellaceae", "k__Bacteria;p__Bacteroidetes;c__Bacteroidia;o__Bacteroidales;f__Rikenellaceae", "k__Bacteria;p__Bacteroidetes;c__Flavobacteriia;o__Flavobacteriales;f__Flavobacteriaceae", "k__Bacteria;p__Bacteroidetes;c__Sphingobacteriia;o__Sphingobacteriales;f__Sphingobacteriaceae", "k__Bacteria;p__Bacteroidetes;c__[Saprospirae];o__[Saprospirales];f__Chitinophagaceae", "k__Bacteria;p__Bacteroidetes;c__[Saprospirae];o__[Saprospirales];f__Saprospiraceae", "k__Bacteria;p__Caldiserica;c__OP5;o__WCHB1-02;f__SHBZ1169", "k__Bacteria;p__Caldiserica;c__TTA-B1;o__;f__", "k__Bacteria;p__Chlorobi;c__Ignavibacteria;o__Ignavibacteriales;f__Ignavibacteriaceae", "k__Bacteria;p__Chlorobi;c__SJA-28;o__;f__", "k__Bacteria;p__Chloroflexi;c__;o__;f__", "k__Bacteria;p__Chloroflexi;c__Anaerolineae;o__Anaerolineales;f__Anaerolinaceae", "k__Bacteria;p__Chloroflexi;c__Anaerolineae;o__Caldilineales;f__Caldilineaceae", "k__Bacteria;p__Chloroflexi;c__Anaerolineae;o__OPB11;f__", "k__Bacteria;p__Chloroflexi;c__Anaerolineae;o__SBR1031;f__SHA-31", "k__Bacteria;p__Chloroflexi;c__Anaerolineae;o__SHA-20;f__", "k__Bacteria;p__Chloroflexi;c__Dehalococcoidetes;o__Dehalococcoidales;__", "k__Bacteria;p__Chloroflexi;c__Ellin6529;o__;f__", "k__Bacteria;p__Chloroflexi;c__TK17;o__mle1-48;f__", "k__Bacteria;p__Chloroflexi;c__Thermomicrobia;o__JG30-KF-CM45;f__", "k__Bacteria;p__Cyanobacteria;c__Chloroplast;o__Streptophyta;f__", "k__Bacteria;p__EM3;c__;o__;f__", "k__Bacteria;p__Fibrobacteres;c__Fibrobacteria;o__Fibrobacterales;f__", "k__Bacteria;p__Fibrobacteres;c__Fibrobacteria;o__Fibrobacterales;f__Fibrobacteraceae", "k__Bacteria;p__Fibrobacteres;c__TG3;o__TG3-1;f__TSCOR003-O20", "k__Bacteria;p__Firmicutes;c__Bacilli;__;__", "k__Bacteria;p__Firmicutes;c__Bacilli;o__Bacillales;__", "k__Bacteria;p__Firmicutes;c__Bacilli;o__Bacillales;f__Bacillaceae", "k__Bacteria;p__Firmicutes;c__Bacilli;o__Bacillales;f__Paenibacillaceae", "k__Bacteria;p__Firmicutes;c__Bacilli;o__Bacillales;f__Planococcaceae", "k__Bacteria;p__Firmicutes;c__Bacilli;o__Bacillales;f__Staphylococcaceae", "k__Bacteria;p__Firmicutes;c__Bacilli;o__Bacillales;f__Thermoactinomycetaceae", "k__Bacteria;p__Firmicutes;c__Bacilli;o__Haloplasmatales;f__Haloplasmataceae", "k__Bacteria;p__Firmicutes;c__Bacilli;o__Lactobacillales;f__Aerococcaceae", "k__Bacteria;p__Firmicutes;c__Bacilli;o__Lactobacillales;f__Carnobacteriaceae", "k__Bacteria;p__Firmicutes;c__Bacilli;o__Lactobacillales;f__Enterococcaceae", "k__Bacteria;p__Firmicutes;c__Bacilli;o__Lactobacillales;f__Lactobacillaceae", "k__Bacteria;p__Firmicutes;c__Bacilli;o__Lactobacillales;f__Leuconostocaceae", "k__Bacteria;p__Firmicutes;c__Bacilli;o__Lactobacillales;f__Streptococcaceae", "k__Bacteria;p__Firmicutes;c__Bacilli;o__Turicibacterales;f__Turicibacteraceae", "k__Bacteria;p__Firmicutes;c__Clostridia;__;__", "k__Bacteria;p__Firmicutes;c__Clostridia;o__;f__", "k__Bacteria;p__Firmicutes;c__Clostridia;o__BSA2B-08;f__", "k__Bacteria;p__Firmicutes;c__Clostridia;o__Clostridiales;__", "k__Bacteria;p__Firmicutes;c__Clostridia;o__Clostridiales;f__", "k__Bacteria;p__Firmicutes;c__Clostridia;o__Clostridiales;f__Caldicoprobacteraceae", "k__Bacteria;p__Firmicutes;c__Clostridia;o__Clostridiales;f__Christensenellaceae", "k__Bacteria;p__Firmicutes;c__Clostridia;o__Clostridiales;f__Clostridiaceae", "k__Bacteria;p__Firmicutes;c__Clostridia;o__Clostridiales;f__Dehalobacteriaceae", "k__Bacteria;p__Firmicutes;c__Clostridia;o__Clostridiales;f__EtOH8", "k__Bacteria;p__Firmicutes;c__Clostridia;o__Clostridiales;f__Eubacteriaceae", "k__Bacteria;p__Firmicutes;c__Clostridia;o__Clostridiales;f__Gracilibacteraceae", "k__Bacteria;p__Firmicutes;c__Clostridia;o__Clostridiales;f__Lachnospiraceae", "k__Bacteria;p__Firmicutes;c__Clostridia;o__Clostridiales;f__Peptococcaceae", "k__Bacteria;p__Firmicutes;c__Clostridia;o__Clostridiales;f__Peptostreptococcaceae", "k__Bacteria;p__Firmicutes;c__Clostridia;o__Clostridiales;f__Ruminococcaceae", "k__Bacteria;p__Firmicutes;c__Clostridia;o__Clostridiales;f__Syntrophomonadaceae", "k__Bacteria;p__Firmicutes;c__Clostridia;o__Clostridiales;f__Veillonellaceae", "k__Bacteria;p__Firmicutes;c__Clostridia;o__Clostridiales;f__[Mogibacteriaceae]", "k__Bacteria;p__Firmicutes;c__Clostridia;o__Clostridiales;f__[Tissierellaceae]", "k__Bacteria;p__Firmicutes;c__Clostridia;o__Halanaerobiales;f__Halanaerobiaceae", "k__Bacteria;p__Firmicutes;c__Clostridia;o__MBA08;f__", "k__Bacteria;p__Firmicutes;c__Clostridia;o__Natranaerobiales;f__", "k__Bacteria;p__Firmicutes;c__Clostridia;o__Natranaerobiales;f__Anaerobrancaceae", "k__Bacteria;p__Firmicutes;c__Clostridia;o__Natranaerobiales;f__ML1228J-1", "k__Bacteria;p__Firmicutes;c__Clostridia;o__Natranaerobiales;f__YAB3B13", "k__Bacteria;p__Firmicutes;c__Clostridia;o__OPB54;f__", "k__Bacteria;p__Firmicutes;c__Clostridia;o__SHA-98;f__", "k__Bacteria;p__Firmicutes;c__Clostridia;o__SHA-98;f__D2", "k__Bacteria;p__Firmicutes;c__Clostridia;o__Thermoanaerobacterales;f__", "k__Bacteria;p__Firmicutes;c__Clostridia;o__Thermoanaerobacterales;f__Thermoanaerobacteraceae", "k__Bacteria;p__Firmicutes;c__Clostridia;o__Thermoanaerobacterales;f__Thermodesulfobiaceae", "k__Bacteria;p__Firmicutes;c__Erysipelotrichi;o__Erysipelotrichales;f__Erysipelotrichaceae", "k__Bacteria;p__Firmicutes;c__OPB54;o__;f__", "k__Bacteria;p__NKB19;c__noFP_H4;o__;f__", "k__Bacteria;p__OD1;c__;o__;f__", "k__Bacteria;p__OD1;c__ABY1;o__;f__", "k__Bacteria;p__OP1;c__OPB14;o__;f__", "k__Bacteria;p__OP8;c__OP8_1;o__OPB95;f__", "k__Bacteria;p__OP9;c__JS1;o__BA021;f__", "k__Bacteria;p__OP9;c__OPB46;o__OPB72;f__TIBD11", "k__Bacteria;p__OP9;c__OPB46;o__SHA-1;f__", "k__Bacteria;p__Proteobacteria;c__Alphaproteobacteria;__;__", "k__Bacteria;p__Proteobacteria;c__Alphaproteobacteria;o__Rhizobiales;f__Hyphomicrobiaceae", "k__Bacteria;p__Proteobacteria;c__Alphaproteobacteria;o__Rhizobiales;f__Methylobacteriaceae", "k__Bacteria;p__Proteobacteria;c__Alphaproteobacteria;o__Rhizobiales;f__Methylocystaceae", "k__Bacteria;p__Proteobacteria;c__Alphaproteobacteria;o__Rhodobacterales;f__Rhodobacteraceae", "k__Bacteria;p__Proteobacteria;c__Alphaproteobacteria;o__Rhodospirillales;f__Rhodospirillaceae", "k__Bacteria;p__Proteobacteria;c__Alphaproteobacteria;o__Sphingomonadales;__", "k__Bacteria;p__Proteobacteria;c__Betaproteobacteria;__;__", "k__Bacteria;p__Proteobacteria;c__Betaproteobacteria;o__Burkholderiales;f__Alcaligenaceae", "k__Bacteria;p__Proteobacteria;c__Betaproteobacteria;o__Burkholderiales;f__Burkholderiaceae", "k__Bacteria;p__Proteobacteria;c__Betaproteobacteria;o__Burkholderiales;f__Comamonadaceae", "k__Bacteria;p__Proteobacteria;c__Betaproteobacteria;o__Thiobacterales;f__Thiobacteraceae", "k__Bacteria;p__Proteobacteria;c__Deltaproteobacteria;__;__", "k__Bacteria;p__Proteobacteria;c__Deltaproteobacteria;o__;f__", "k__Bacteria;p__Proteobacteria;c__Deltaproteobacteria;o__Syntrophobacterales;f__Syntrophaceae", "k__Bacteria;p__Proteobacteria;c__Deltaproteobacteria;o__Syntrophobacterales;f__Syntrophorhabdaceae", "k__Bacteria;p__Proteobacteria;c__Epsilonproteobacteria;o__Campylobacterales;f__Campylobacteraceae", "k__Bacteria;p__Proteobacteria;c__Gammaproteobacteria;__;__", "k__Bacteria;p__Proteobacteria;c__Gammaproteobacteria;o__Aeromonadales;f__Aeromonadaceae", "k__Bacteria;p__Proteobacteria;c__Gammaproteobacteria;o__Aeromonadales;f__Succinivibrionaceae", "k__Bacteria;p__Proteobacteria;c__Gammaproteobacteria;o__Pseudomonadales;f__Moraxellaceae", "k__Bacteria;p__Proteobacteria;c__Gammaproteobacteria;o__Pseudomonadales;f__Pseudomonadaceae", "k__Bacteria;p__Proteobacteria;c__Gammaproteobacteria;o__Xanthomonadales;f__Xanthomonadaceae", "k__Bacteria;p__SAR406;c__AB16;o__noFP_H7;f__", "k__Bacteria;p__SR1;c__;o__;f__", "k__Bacteria;p__Spirochaetes;c__MVP-15;o__PL-11B10;f__", "k__Bacteria;p__Spirochaetes;c__Spirochaetes;o__Sphaerochaetales;f__Sphaerochaetaceae", "k__Bacteria;p__Spirochaetes;c__Spirochaetes;o__Spirochaetales;f__Spirochaetaceae", "k__Bacteria;p__Spirochaetes;c__[Leptospirae];o__[Leptospirales];f__Sediment-4", "k__Bacteria;p__Synergistetes;c__Synergistia;o__Synergistales;f__", "k__Bacteria;p__Synergistetes;c__Synergistia;o__Synergistales;f__Anaerobaculaceae", "k__Bacteria;p__Synergistetes;c__Synergistia;o__Synergistales;f__Dethiosulfovibrionaceae", "k__Bacteria;p__Synergistetes;c__Synergistia;o__Synergistales;f__Synergistaceae", "k__Bacteria;p__Synergistetes;c__Synergistia;o__Synergistales;f__Thermovirgaceae", "k__Bacteria;p__TA06;c__;o__;f__", "k__Bacteria;p__TM7;c__TM7-1;o__;f__", "k__Bacteria;p__TM7;c__TM7-3;__;__", "k__Bacteria;p__TM7;c__TM7-3;o__;f__", "k__Bacteria;p__TM7;c__TM7-3;o__CW040;f__F16", "k__Bacteria;p__TM7;c__TM7-3;o__I025;f__", "k__Bacteria;p__Tenericutes;c__Mollicutes;o__;f__", "k__Bacteria;p__Tenericutes;c__Mollicutes;o__Acholeplasmatales;f__Acholeplasmataceae", "k__Bacteria;p__Tenericutes;c__Mollicutes;o__RF39;f__", "k__Bacteria;p__Tenericutes;c__RF3;o__ML615J-28;f__", "k__Bacteria;p__Thermotogae;c__Thermotogae;o__Thermotogales;f__Thermotogaceae", "k__Bacteria;p__Verrucomicrobia;c__Verruco-5;o__LD1-PB3;f__", "k__Bacteria;p__Verrucomicrobia;c__[Pedosphaerae];o__[Pedosphaerales];f__R4-41B", "k__Bacteria;p__WPS-2;c__;o__;f__", "k__Bacteria;p__WS6;c__SC72;o__A-2AF;f__", "k__Bacteria;p__WS6;c__SC72;o__WCHB1-15;f__", "k__Bacteria;p__WWE1;c__[Cloacamonae];o__[Cloacamonales];f__", "k__Bacteria;p__WWE1;c__[Cloacamonae];o__[Cloacamonales];f__CW-1", "k__Bacteria;p__WWE1;c__[Cloacamonae];o__[Cloacamonales];f__[Cloacamonaceae]", "plant type", "plant no."],[{"index":"01_U341F-U806R-NW3-1","k__Archaea;p__Crenarchaeota;c__MCG;o__pGrfC26;f__":0.0,"k__Archaea;p__Euryarchaeota;c__Methanobacteria;o__Methanobacteriales;f__Methanobacteriaceae":0.0,"k__Archaea;p__Euryarchaeota;c__Methanobacteria;o__Methanobacteriales;f__WSA2":0.0,"k__Archaea;p__Euryarchaeota;c__Methanomicrobia;o__Methanomicrobiales;f__Methanomicrobiaceae":0.0,"k__Archaea;p__Euryarchaeota;c__Methanomicrobia;o__Methanomicrobiales;f__Methanoregulaceae":0.0,"k__Archaea;p__Euryarchaeota;c__Methanomicrobia;o__Methanomicrobiales;f__Methanospirillaceae":0.0,"k__Archaea;p__Euryarchaeota;c__Methanomicrobia;o__Methanosarcinales;f__Methanosaetaceae":0.0,"k__Archaea;p__Euryarchaeota;c__Methanomicrobia;o__Methanosarcinales;f__Methanosarcinaceae":97.0,"k__Archaea;p__Euryarchaeota;c__Thermoplasmata;o__E2;f__[Methanomassiliicoccaceae]":0.0,"k__Archaea;p__[Parvarchaeota];c__[Parvarchaea];o__WCHD3-30;f__":0.0,"k__Bacteria;__;__;__;__":0.0,"k__Bacteria;p__;c__;o__;f__":35.0,"k__Bacteria;p__Acidobacteria;c__BPC102;o__MVS-40;f__":0.0,"k__Bacteria;p__Acidobacteria;c__Solibacteres;o__Solibacterales;f__AKIW659":0.0,"k__Bacteria;p__Acidobacteria;c__[Chloracidobacteria];o__RB41;f__Ellin6075":0.0,"k__Bacteria;p__Actinobacteria;c__;o__;f__":0.0,"k__Bacteria;p__Actinobacteria;c__Acidimicrobiia;o__Acidimicrobiales;f__":0.0,"k__Bacteria;p__Actinobacteria;c__Acidimicrobiia;o__Acidimicrobiales;f__C111":0.0,"k__Bacteria;p__Actinobacteria;c__Acidimicrobiia;o__Acidimicrobiales;f__Microthrixaceae":0.0,"k__Bacteria;p__Actinobacteria;c__Actinobacteria;o__Actinomycetales;__":0.0,"k__Bacteria;p__Actinobacteria;c__Actinobacteria;o__Actinomycetales;f__Corynebacteriaceae":9.0,"k__Bacteria;p__Actinobacteria;c__Actinobacteria;o__Actinomycetales;f__Dermatophilaceae":0.0,"k__Bacteria;p__Actinobacteria;c__Actinobacteria;o__Actinomycetales;f__Intrasporangiaceae":0.0,"k__Bacteria;p__Actinobacteria;c__Actinobacteria;o__Actinomycetales;f__Microbacteriaceae":0.0,"k__Bacteria;p__Actinobacteria;c__Actinobacteria;o__Actinomycetales;f__Nocardioidaceae":0.0,"k__Bacteria;p__Actinobacteria;c__Actinobacteria;o__Actinomycetales;f__Nocardiopsaceae":0.0,"k__Bacteria;p__Actinobacteria;c__Actinobacteria;o__Actinomycetales;f__Pseudonocardiaceae":0.0,"k__Bacteria;p__Actinobacteria;c__Actinobacteria;o__Actinomycetales;f__Streptomycetaceae":0.0,"k__Bacteria;p__Actinobacteria;c__Actinobacteria;o__Bifidobacteriales;f__Bifidobacteriaceae":0.0,"k__Bacteria;p__Actinobacteria;c__Actinobacteria;o__WCHB1-81;f__At425_EubF1":0.0,"k__Bacteria;p__Actinobacteria;c__Coriobacteriia;o__Coriobacteriales;f__Coriobacteriaceae":0.0,"k__Bacteria;p__Armatimonadetes;c__SJA-176;o__GAB-B06;f__":0.0,"k__Bacteria;p__Bacteroidetes;__;__;__":117.0,"k__Bacteria;p__Bacteroidetes;c__Bacteroidia;o__Bacteroidales;__":46.0,"k__Bacteria;p__Bacteroidetes;c__Bacteroidia;o__Bacteroidales;f__":155.0,"k__Bacteria;p__Bacteroidetes;c__Bacteroidia;o__Bacteroidales;f__Bacteroidaceae":82.0,"k__Bacteria;p__Bacteroidetes;c__Bacteroidia;o__Bacteroidales;f__Marinilabiaceae":23.0,"k__Bacteria;p__Bacteroidetes;c__Bacteroidia;o__Bacteroidales;f__Porphyromonadaceae":9.0,"k__Bacteria;p__Bacteroidetes;c__Bacteroidia;o__Bacteroidales;f__Prevotellaceae":0.0,"k__Bacteria;p__Bacteroidetes;c__Bacteroidia;o__Bacteroidales;f__Rikenellaceae":0.0,"k__Bacteria;p__Bacteroidetes;c__Flavobacteriia;o__Flavobacteriales;f__Flavobacteriaceae":0.0,"k__Bacteria;p__Bacteroidetes;c__Sphingobacteriia;o__Sphingobacteriales;f__Sphingobacteriaceae":0.0,"k__Bacteria;p__Bacteroidetes;c__[Saprospirae];o__[Saprospirales];f__Chitinophagaceae":0.0,"k__Bacteria;p__Bacteroidetes;c__[Saprospirae];o__[Saprospirales];f__Saprospiraceae":0.0,"k__Bacteria;p__Caldiserica;c__OP5;o__WCHB1-02;f__SHBZ1169":0.0,"k__Bacteria;p__Caldiserica;c__TTA-B1;o__;f__":0.0,"k__Bacteria;p__Chlorobi;c__Ignavibacteria;o__Ignavibacteriales;f__Ignavibacteriaceae":0.0,"k__Bacteria;p__Chlorobi;c__SJA-28;o__;f__":0.0,"k__Bacteria;p__Chloroflexi;c__;o__;f__":0.0,"k__Bacteria;p__Chloroflexi;c__Anaerolineae;o__Anaerolineales;f__Anaerolinaceae":0.0,"k__Bacteria;p__Chloroflexi;c__Anaerolineae;o__Caldilineales;f__Caldilineaceae":0.0,"k__Bacteria;p__Chloroflexi;c__Anaerolineae;o__OPB11;f__":0.0,"k__Bacteria;p__Chloroflexi;c__Anaerolineae;o__SBR1031;f__SHA-31":0.0,"k__Bacteria;p__Chloroflexi;c__Anaerolineae;o__SHA-20;f__":0.0,"k__Bacteria;p__Chloroflexi;c__Dehalococcoidetes;o__Dehalococcoidales;__":0.0,"k__Bacteria;p__Chloroflexi;c__Ellin6529;o__;f__":0.0,"k__Bacteria;p__Chloroflexi;c__TK17;o__mle1-48;f__":0.0,"k__Bacteria;p__Chloroflexi;c__Thermomicrobia;o__JG30-KF-CM45;f__":0.0,"k__Bacteria;p__Cyanobacteria;c__Chloroplast;o__Streptophyta;f__":0.0,"k__Bacteria;p__EM3;c__;o__;f__":0.0,"k__Bacteria;p__Fibrobacteres;c__Fibrobacteria;o__Fibrobacterales;f__":0.0,"k__Bacteria;p__Fibrobacteres;c__Fibrobacteria;o__Fibrobacterales;f__Fibrobacteraceae":0.0,"k__Bacteria;p__Fibrobacteres;c__TG3;o__TG3-1;f__TSCOR003-O20":10.0,"k__Bacteria;p__Firmicutes;c__Bacilli;__;__":0.0,"k__Bacteria;p__Firmicutes;c__Bacilli;o__Bacillales;__":0.0,"k__Bacteria;p__Firmicutes;c__Bacilli;o__Bacillales;f__Bacillaceae":23.0,"k__Bacteria;p__Firmicutes;c__Bacilli;o__Bacillales;f__Paenibacillaceae":0.0,"k__Bacteria;p__Firmicutes;c__Bacilli;o__Bacillales;f__Planococcaceae":0.0,"k__Bacteria;p__Firmicutes;c__Bacilli;o__Bacillales;f__Staphylococcaceae":0.0,"k__Bacteria;p__Firmicutes;c__Bacilli;o__Bacillales;f__Thermoactinomycetaceae":0.0,"k__Bacteria;p__Firmicutes;c__Bacilli;o__Haloplasmatales;f__Haloplasmataceae":0.0,"k__Bacteria;p__Firmicutes;c__Bacilli;o__Lactobacillales;f__Aerococcaceae":0.0,"k__Bacteria;p__Firmicutes;c__Bacilli;o__Lactobacillales;f__Carnobacteriaceae":0.0,"k__Bacteria;p__Firmicutes;c__Bacilli;o__Lactobacillales;f__Enterococcaceae":0.0,"k__Bacteria;p__Firmicutes;c__Bacilli;o__Lactobacillales;f__Lactobacillaceae":0.0,"k__Bacteria;p__Firmicutes;c__Bacilli;o__Lactobacillales;f__Leuconostocaceae":0.0,"k__Bacteria;p__Firmicutes;c__Bacilli;o__Lactobacillales;f__Streptococcaceae":0.0,"k__Bacteria;p__Firmicutes;c__Bacilli;o__Turicibacterales;f__Turicibacteraceae":5.0,"k__Bacteria;p__Firmicutes;c__Clostridia;__;__":74.0,"k__Bacteria;p__Firmicutes;c__Clostridia;o__;f__":0.0,"k__Bacteria;p__Firmicutes;c__Clostridia;o__BSA2B-08;f__":0.0,"k__Bacteria;p__Firmicutes;c__Clostridia;o__Clostridiales;__":0.0,"k__Bacteria;p__Firmicutes;c__Clostridia;o__Clostridiales;f__":45.0,"k__Bacteria;p__Firmicutes;c__Clostridia;o__Clostridiales;f__Caldicoprobacteraceae":145.0,"k__Bacteria;p__Firmicutes;c__Clostridia;o__Clostridiales;f__Christensenellaceae":0.0,"k__Bacteria;p__Firmicutes;c__Clostridia;o__Clostridiales;f__Clostridiaceae":133.0,"k__Bacteria;p__Firmicutes;c__Clostridia;o__Clostridiales;f__Dehalobacteriaceae":0.0,"k__Bacteria;p__Firmicutes;c__Clostridia;o__Clostridiales;f__EtOH8":0.0,"k__Bacteria;p__Firmicutes;c__Clostridia;o__Clostridiales;f__Eubacteriaceae":0.0,"k__Bacteria;p__Firmicutes;c__Clostridia;o__Clostridiales;f__Gracilibacteraceae":0.0,"k__Bacteria;p__Firmicutes;c__Clostridia;o__Clostridiales;f__Lachnospiraceae":0.0,"k__Bacteria;p__Firmicutes;c__Clostridia;o__Clostridiales;f__Peptococcaceae":0.0,"k__Bacteria;p__Firmicutes;c__Clostridia;o__Clostridiales;f__Peptostreptococcaceae":39.0,"k__Bacteria;p__Firmicutes;c__Clostridia;o__Clostridiales;f__Ruminococcaceae":60.0,"k__Bacteria;p__Firmicutes;c__Clostridia;o__Clostridiales;f__Syntrophomonadaceae":0.0,"k__Bacteria;p__Firmicutes;c__Clostridia;o__Clostridiales;f__Veillonellaceae":0.0,"k__Bacteria;p__Firmicutes;c__Clostridia;o__Clostridiales;f__[Mogibacteriaceae]":0.0,"k__Bacteria;p__Firmicutes;c__Clostridia;o__Clostridiales;f__[Tissierellaceae]":25.0,"k__Bacteria;p__Firmicutes;c__Clostridia;o__Halanaerobiales;f__Halanaerobiaceae":11.0,"k__Bacteria;p__Firmicutes;c__Clostridia;o__MBA08;f__":959.0,"k__Bacteria;p__Firmicutes;c__Clostridia;o__Natranaerobiales;f__":0.0,"k__Bacteria;p__Firmicutes;c__Clostridia;o__Natranaerobiales;f__Anaerobrancaceae":0.0,"k__Bacteria;p__Firmicutes;c__Clostridia;o__Natranaerobiales;f__ML1228J-1":0.0,"k__Bacteria;p__Firmicutes;c__Clostridia;o__Natranaerobiales;f__YAB3B13":0.0,"k__Bacteria;p__Firmicutes;c__Clostridia;o__OPB54;f__":0.0,"k__Bacteria;p__Firmicutes;c__Clostridia;o__SHA-98;f__":119.0,"k__Bacteria;p__Firmicutes;c__Clostridia;o__SHA-98;f__D2":15.0,"k__Bacteria;p__Firmicutes;c__Clostridia;o__Thermoanaerobacterales;f__":37.0,"k__Bacteria;p__Firmicutes;c__Clostridia;o__Thermoanaerobacterales;f__Thermoanaerobacteraceae":21.0,"k__Bacteria;p__Firmicutes;c__Clostridia;o__Thermoanaerobacterales;f__Thermodesulfobiaceae":0.0,"k__Bacteria;p__Firmicutes;c__Erysipelotrichi;o__Erysipelotrichales;f__Erysipelotrichaceae":0.0,"k__Bacteria;p__Firmicutes;c__OPB54;o__;f__":5.0,"k__Bacteria;p__NKB19;c__noFP_H4;o__;f__":0.0,"k__Bacteria;p__OD1;c__;o__;f__":0.0,"k__Bacteria;p__OD1;c__ABY1;o__;f__":0.0,"k__Bacteria;p__OP1;c__OPB14;o__;f__":0.0,"k__Bacteria;p__OP8;c__OP8_1;o__OPB95;f__":0.0,"k__Bacteria;p__OP9;c__JS1;o__BA021;f__":0.0,"k__Bacteria;p__OP9;c__OPB46;o__OPB72;f__TIBD11":55.0,"k__Bacteria;p__OP9;c__OPB46;o__SHA-1;f__":0.0,"k__Bacteria;p__Proteobacteria;c__Alphaproteobacteria;__;__":0.0,"k__Bacteria;p__Proteobacteria;c__Alphaproteobacteria;o__Rhizobiales;f__Hyphomicrobiaceae":0.0,"k__Bacteria;p__Proteobacteria;c__Alphaproteobacteria;o__Rhizobiales;f__Methylobacteriaceae":0.0,"k__Bacteria;p__Proteobacteria;c__Alphaproteobacteria;o__Rhizobiales;f__Methylocystaceae":0.0,"k__Bacteria;p__Proteobacteria;c__Alphaproteobacteria;o__Rhodobacterales;f__Rhodobacteraceae":0.0,"k__Bacteria;p__Proteobacteria;c__Alphaproteobacteria;o__Rhodospirillales;f__Rhodospirillaceae":0.0,"k__Bacteria;p__Proteobacteria;c__Alphaproteobacteria;o__Sphingomonadales;__":0.0,"k__Bacteria;p__Proteobacteria;c__Betaproteobacteria;__;__":0.0,"k__Bacteria;p__Proteobacteria;c__Betaproteobacteria;o__Burkholderiales;f__Alcaligenaceae":0.0,"k__Bacteria;p__Proteobacteria;c__Betaproteobacteria;o__Burkholderiales;f__Burkholderiaceae":0.0,"k__Bacteria;p__Proteobacteria;c__Betaproteobacteria;o__Burkholderiales;f__Comamonadaceae":0.0,"k__Bacteria;p__Proteobacteria;c__Betaproteobacteria;o__Thiobacterales;f__Thiobacteraceae":0.0,"k__Bacteria;p__Proteobacteria;c__Deltaproteobacteria;__;__":0.0,"k__Bacteria;p__Proteobacteria;c__Deltaproteobacteria;o__;f__":0.0,"k__Bacteria;p__Proteobacteria;c__Deltaproteobacteria;o__Syntrophobacterales;f__Syntrophaceae":0.0,"k__Bacteria;p__Proteobacteria;c__Deltaproteobacteria;o__Syntrophobacterales;f__Syntrophorhabdaceae":0.0,"k__Bacteria;p__Proteobacteria;c__Epsilonproteobacteria;o__Campylobacterales;f__Campylobacteraceae":0.0,"k__Bacteria;p__Proteobacteria;c__Gammaproteobacteria;__;__":0.0,"k__Bacteria;p__Proteobacteria;c__Gammaproteobacteria;o__Aeromonadales;f__Aeromonadaceae":0.0,"k__Bacteria;p__Proteobacteria;c__Gammaproteobacteria;o__Aeromonadales;f__Succinivibrionaceae":0.0,"k__Bacteria;p__Proteobacteria;c__Gammaproteobacteria;o__Pseudomonadales;f__Moraxellaceae":0.0,"k__Bacteria;p__Proteobacteria;c__Gammaproteobacteria;o__Pseudomonadales;f__Pseudomonadaceae":0.0,"k__Bacteria;p__Proteobacteria;c__Gammaproteobacteria;o__Xanthomonadales;f__Xanthomonadaceae":0.0,"k__Bacteria;p__SAR406;c__AB16;o__noFP_H7;f__":0.0,"k__Bacteria;p__SR1;c__;o__;f__":2.0,"k__Bacteria;p__Spirochaetes;c__MVP-15;o__PL-11B10;f__":0.0,"k__Bacteria;p__Spirochaetes;c__Spirochaetes;o__Sphaerochaetales;f__Sphaerochaetaceae":0.0,"k__Bacteria;p__Spirochaetes;c__Spirochaetes;o__Spirochaetales;f__Spirochaetaceae":10.0,"k__Bacteria;p__Spirochaetes;c__[Leptospirae];o__[Leptospirales];f__Sediment-4":0.0,"k__Bacteria;p__Synergistetes;c__Synergistia;o__Synergistales;f__":0.0,"k__Bacteria;p__Synergistetes;c__Synergistia;o__Synergistales;f__Anaerobaculaceae":111.0,"k__Bacteria;p__Synergistetes;c__Synergistia;o__Synergistales;f__Dethiosulfovibrionaceae":0.0,"k__Bacteria;p__Synergistetes;c__Synergistia;o__Synergistales;f__Synergistaceae":0.0,"k__Bacteria;p__Synergistetes;c__Synergistia;o__Synergistales;f__Thermovirgaceae":0.0,"k__Bacteria;p__TA06;c__;o__;f__":0.0,"k__Bacteria;p__TM7;c__TM7-1;o__;f__":0.0,"k__Bacteria;p__TM7;c__TM7-3;__;__":0.0,"k__Bacteria;p__TM7;c__TM7-3;o__;f__":0.0,"k__Bacteria;p__TM7;c__TM7-3;o__CW040;f__F16":0.0,"k__Bacteria;p__TM7;c__TM7-3;o__I025;f__":0.0,"k__Bacteria;p__Tenericutes;c__Mollicutes;o__;f__":0.0,"k__Bacteria;p__Tenericutes;c__Mollicutes;o__Acholeplasmatales;f__Acholeplasmataceae":0.0,"k__Bacteria;p__Tenericutes;c__Mollicutes;o__RF39;f__":0.0,"k__Bacteria;p__Tenericutes;c__RF3;o__ML615J-28;f__":16.0,"k__Bacteria;p__Thermotogae;c__Thermotogae;o__Thermotogales;f__Thermotogaceae":110.0,"k__Bacteria;p__Verrucomicrobia;c__Verruco-5;o__LD1-PB3;f__":0.0,"k__Bacteria;p__Verrucomicrobia;c__[Pedosphaerae];o__[Pedosphaerales];f__R4-41B":0.0,"k__Bacteria;p__WPS-2;c__;o__;f__":0.0,"k__Bacteria;p__WS6;c__SC72;o__A-2AF;f__":0.0,"k__Bacteria;p__WS6;c__SC72;o__WCHB1-15;f__":0.0,"k__Bacteria;p__WWE1;c__[Cloacamonae];o__[Cloacamonales];f__":41.0,"k__Bacteria;p__WWE1;c__[Cloacamonae];o__[Cloacamonales];f__CW-1":0.0,"k__Bacteria;p__WWE1;c__[Cloacamonae];o__[Cloacamonales];f__[Cloacamonaceae]":0.0,"plant type":"Biogas","plant no.":"#01"},{"index":"02_U341F-U806R-NW3-2","k__Archaea;p__Crenarchaeota;c__MCG;o__pGrfC26;f__":22.0,"k__Archaea;p__Euryarchaeota;c__Methanobacteria;o__Methanobacteriales;f__Methanobacteriaceae":13.0,"k__Archaea;p__Euryarchaeota;c__Methanobacteria;o__Methanobacteriales;f__WSA2":11.0,"k__Archaea;p__Euryarchaeota;c__Methanomicrobia;o__Methanomicrobiales;f__Methanomicrobiaceae":0.0,"k__Archaea;p__Euryarchaeota;c__Methanomicrobia;o__Methanomicrobiales;f__Methanoregulaceae":0.0,"k__Archaea;p__Euryarchaeota;c__Methanomicrobia;o__Methanomicrobiales;f__Methanospirillaceae":0.0,"k__Archaea;p__Euryarchaeota;c__Methanomicrobia;o__Methanosarcinales;f__Methanosaetaceae":295.0,"k__Archaea;p__Euryarchaeota;c__Methanomicrobia;o__Methanosarcinales;f__Methanosarcinaceae":0.0,"k__Archaea;p__Euryarchaeota;c__Thermoplasmata;o__E2;f__[Methanomassiliicoccaceae]":0.0,"k__Archaea;p__[Parvarchaeota];c__[Parvarchaea];o__WCHD3-30;f__":0.0,"k__Bacteria;__;__;__;__":191.0,"k__Bacteria;p__;c__;o__;f__":169.0,"k__Bacteria;p__Acidobacteria;c__BPC102;o__MVS-40;f__":54.0,"k__Bacteria;p__Acidobacteria;c__Solibacteres;o__Solibacterales;f__AKIW659":0.0,"k__Bacteria;p__Acidobacteria;c__[Chloracidobacteria];o__RB41;f__Ellin6075":0.0,"k__Bacteria;p__Actinobacteria;c__;o__;f__":0.0,"k__Bacteria;p__Actinobacteria;c__Acidimicrobiia;o__Acidimicrobiales;f__":0.0,"k__Bacteria;p__Actinobacteria;c__Acidimicrobiia;o__Acidimicrobiales;f__C111":0.0,"k__Bacteria;p__Actinobacteria;c__Acidimicrobiia;o__Acidimicrobiales;f__Microthrixaceae":0.0,"k__Bacteria;p__Actinobacteria;c__Actinobacteria;o__Actinomycetales;__":0.0,"k__Bacteria;p__Actinobacteria;c__Actinobacteria;o__Actinomycetales;f__Corynebacteriaceae":51.0,"k__Bacteria;p__Actinobacteria;c__Actinobacteria;o__Actinomycetales;f__Dermatophilaceae":0.0,"k__Bacteria;p__Actinobacteria;c__Actinobacteria;o__Actinomycetales;f__Intrasporangiaceae":0.0,"k__Bacteria;p__Actinobacteria;c__Actinobacteria;o__Actinomycetales;f__Microbacteriaceae":0.0,"k__Bacteria;p__Actinobacteria;c__Actinobacteria;o__Actinomycetales;f__Nocardioidaceae":0.0,"k__Bacteria;p__Actinobacteria;c__Actinobacteria;o__Actinomycetales;f__Nocardiopsaceae":0.0,"k__Bacteria;p__Actinobacteria;c__Actinobacteria;o__Actinomycetales;f__Pseudonocardiaceae":0.0,"k__Bacteria;p__Actinobacteria;c__Actinobacteria;o__Actinomycetales;f__Streptomycetaceae":0.0,"k__Bacteria;p__Actinobacteria;c__Actinobacteria;o__Bifidobacteriales;f__Bifidobacteriaceae":38.0,"k__Bacteria;p__Actinobacteria;c__Actinobacteria;o__WCHB1-81;f__At425_EubF1":0.0,"k__Bacteria;p__Actinobacteria;c__Coriobacteriia;o__Coriobacteriales;f__Coriobacteriaceae":62.0,"k__Bacteria;p__Armatimonadetes;c__SJA-176;o__GAB-B06;f__":0.0,"k__Bacteria;p__Bacteroidetes;__;__;__":7.0,"k__Bacteria;p__Bacteroidetes;c__Bacteroidia;o__Bacteroidales;__":0.0,"k__Bacteria;p__Bacteroidetes;c__Bacteroidia;o__Bacteroidales;f__":1659.0,"k__Bacteria;p__Bacteroidetes;c__Bacteroidia;o__Bacteroidales;f__Bacteroidaceae":833.0,"k__Bacteria;p__Bacteroidetes;c__Bacteroidia;o__Bacteroidales;f__Marinilabiaceae":247.0,"k__Bacteria;p__Bacteroidetes;c__Bacteroidia;o__Bacteroidales;f__Porphyromonadaceae":110.0,"k__Bacteria;p__Bacteroidetes;c__Bacteroidia;o__Bacteroidales;f__Prevotellaceae":15.0,"k__Bacteria;p__Bacteroidetes;c__Bacteroidia;o__Bacteroidales;f__Rikenellaceae":0.0,"k__Bacteria;p__Bacteroidetes;c__Flavobacteriia;o__Flavobacteriales;f__Flavobacteriaceae":0.0,"k__Bacteria;p__Bacteroidetes;c__Sphingobacteriia;o__Sphingobacteriales;f__Sphingobacteriaceae":0.0,"k__Bacteria;p__Bacteroidetes;c__[Saprospirae];o__[Saprospirales];f__Chitinophagaceae":0.0,"k__Bacteria;p__Bacteroidetes;c__[Saprospirae];o__[Saprospirales];f__Saprospiraceae":0.0,"k__Bacteria;p__Caldiserica;c__OP5;o__WCHB1-02;f__SHBZ1169":0.0,"k__Bacteria;p__Caldiserica;c__TTA-B1;o__;f__":0.0,"k__Bacteria;p__Chlorobi;c__Ignavibacteria;o__Ignavibacteriales;f__Ignavibacteriaceae":0.0,"k__Bacteria;p__Chlorobi;c__SJA-28;o__;f__":0.0,"k__Bacteria;p__Chloroflexi;c__;o__;f__":0.0,"k__Bacteria;p__Chloroflexi;c__Anaerolineae;o__Anaerolineales;f__Anaerolinaceae":20.0,"k__Bacteria;p__Chloroflexi;c__Anaerolineae;o__Caldilineales;f__Caldilineaceae":0.0,"k__Bacteria;p__Chloroflexi;c__Anaerolineae;o__OPB11;f__":0.0,"k__Bacteria;p__Chloroflexi;c__Anaerolineae;o__SBR1031;f__SHA-31":0.0,"k__Bacteria;p__Chloroflexi;c__Anaerolineae;o__SHA-20;f__":0.0,"k__Bacteria;p__Chloroflexi;c__Dehalococcoidetes;o__Dehalococcoidales;__":6.0,"k__Bacteria;p__Chloroflexi;c__Ellin6529;o__;f__":0.0,"k__Bacteria;p__Chloroflexi;c__TK17;o__mle1-48;f__":0.0,"k__Bacteria;p__Chloroflexi;c__Thermomicrobia;o__JG30-KF-CM45;f__":0.0,"k__Bacteria;p__Cyanobacteria;c__Chloroplast;o__Streptophyta;f__":0.0,"k__Bacteria;p__EM3;c__;o__;f__":0.0,"k__Bacteria;p__Fibrobacteres;c__Fibrobacteria;o__Fibrobacterales;f__":0.0,"k__Bacteria;p__Fibrobacteres;c__Fibrobacteria;o__Fibrobacterales;f__Fibrobacteraceae":11.0,"k__Bacteria;p__Fibrobacteres;c__TG3;o__TG3-1;f__TSCOR003-O20":92.0,"k__Bacteria;p__Firmicutes;c__Bacilli;__;__":0.0,"k__Bacteria;p__Firmicutes;c__Bacilli;o__Bacillales;__":0.0,"k__Bacteria;p__Firmicutes;c__Bacilli;o__Bacillales;f__Bacillaceae":0.0,"k__Bacteria;p__Firmicutes;c__Bacilli;o__Bacillales;f__Paenibacillaceae":0.0,"k__Bacteria;p__Firmicutes;c__Bacilli;o__Bacillales;f__Planococcaceae":0.0,"k__Bacteria;p__Firmicutes;c__Bacilli;o__Bacillales;f__Staphylococcaceae":5.0,"k__Bacteria;p__Firmicutes;c__Bacilli;o__Bacillales;f__Thermoactinomycetaceae":0.0,"k__Bacteria;p__Firmicutes;c__Bacilli;o__Haloplasmatales;f__Haloplasmataceae":0.0,"k__Bacteria;p__Firmicutes;c__Bacilli;o__Lactobacillales;f__Aerococcaceae":0.0,"k__Bacteria;p__Firmicutes;c__Bacilli;o__Lactobacillales;f__Carnobacteriaceae":0.0,"k__Bacteria;p__Firmicutes;c__Bacilli;o__Lactobacillales;f__Enterococcaceae":0.0,"k__Bacteria;p__Firmicutes;c__Bacilli;o__Lactobacillales;f__Lactobacillaceae":30.0,"k__Bacteria;p__Firmicutes;c__Bacilli;o__Lactobacillales;f__Leuconostocaceae":0.0,"k__Bacteria;p__Firmicutes;c__Bacilli;o__Lactobacillales;f__Streptococcaceae":0.0,"k__Bacteria;p__Firmicutes;c__Bacilli;o__Turicibacterales;f__Turicibacteraceae":0.0,"k__Bacteria;p__Firmicutes;c__Clostridia;__;__":43.0,"k__Bacteria;p__Firmicutes;c__Clostridia;o__;f__":0.0,"k__Bacteria;p__Firmicutes;c__Clostridia;o__BSA2B-08;f__":0.0,"k__Bacteria;p__Firmicutes;c__Clostridia;o__Clostridiales;__":407.0,"k__Bacteria;p__Firmicutes;c__Clostridia;o__Clostridiales;f__":326.0,"k__Bacteria;p__Firmicutes;c__Clostridia;o__Clostridiales;f__Caldicoprobacteraceae":763.0,"k__Bacteria;p__Firmicutes;c__Clostridia;o__Clostridiales;f__Christensenellaceae":28.0,"k__Bacteria;p__Firmicutes;c__Clostridia;o__Clostridiales;f__Clostridiaceae":681.0,"k__Bacteria;p__Firmicutes;c__Clostridia;o__Clostridiales;f__Dehalobacteriaceae":0.0,"k__Bacteria;p__Firmicutes;c__Clostridia;o__Clostridiales;f__EtOH8":18.0,"k__Bacteria;p__Firmicutes;c__Clostridia;o__Clostridiales;f__Eubacteriaceae":0.0,"k__Bacteria;p__Firmicutes;c__Clostridia;o__Clostridiales;f__Gracilibacteraceae":77.0,"k__Bacteria;p__Firmicutes;c__Clostridia;o__Clostridiales;f__Lachnospiraceae":0.0,"k__Bacteria;p__Firmicutes;c__Clostridia;o__Clostridiales;f__Peptococcaceae":46.0,"k__Bacteria;p__Firmicutes;c__Clostridia;o__Clostridiales;f__Peptostreptococcaceae":170.0,"k__Bacteria;p__Firmicutes;c__Clostridia;o__Clostridiales;f__Ruminococcaceae":1199.0,"k__Bacteria;p__Firmicutes;c__Clostridia;o__Clostridiales;f__Syntrophomonadaceae":104.0,"k__Bacteria;p__Firmicutes;c__Clostridia;o__Clostridiales;f__Veillonellaceae":12.0,"k__Bacteria;p__Firmicutes;c__Clostridia;o__Clostridiales;f__[Mogibacteriaceae]":87.0,"k__Bacteria;p__Firmicutes;c__Clostridia;o__Clostridiales;f__[Tissierellaceae]":870.0,"k__Bacteria;p__Firmicutes;c__Clostridia;o__Halanaerobiales;f__Halanaerobiaceae":0.0,"k__Bacteria;p__Firmicutes;c__Clostridia;o__MBA08;f__":1634.0,"k__Bacteria;p__Firmicutes;c__Clostridia;o__Natranaerobiales;f__":0.0,"k__Bacteria;p__Firmicutes;c__Clostridia;o__Natranaerobiales;f__Anaerobrancaceae":12.0,"k__Bacteria;p__Firmicutes;c__Clostridia;o__Natranaerobiales;f__ML1228J-1":0.0,"k__Bacteria;p__Firmicutes;c__Clostridia;o__Natranaerobiales;f__YAB3B13":32.0,"k__Bacteria;p__Firmicutes;c__Clostridia;o__OPB54;f__":0.0,"k__Bacteria;p__Firmicutes;c__Clostridia;o__SHA-98;f__":42.0,"k__Bacteria;p__Firmicutes;c__Clostridia;o__SHA-98;f__D2":37.0,"k__Bacteria;p__Firmicutes;c__Clostridia;o__Thermoanaerobacterales;f__":12.0,"k__Bacteria;p__Firmicutes;c__Clostridia;o__Thermoanaerobacterales;f__Thermoanaerobacteraceae":0.0,"k__Bacteria;p__Firmicutes;c__Clostridia;o__Thermoanaerobacterales;f__Thermodesulfobiaceae":0.0,"k__Bacteria;p__Firmicutes;c__Erysipelotrichi;o__Erysipelotrichales;f__Erysipelotrichaceae":37.0,"k__Bacteria;p__Firmicutes;c__OPB54;o__;f__":23.0,"k__Bacteria;p__NKB19;c__noFP_H4;o__;f__":5.0,"k__Bacteria;p__OD1;c__;o__;f__":0.0,"k__Bacteria;p__OD1;c__ABY1;o__;f__":5.0,"k__Bacteria;p__OP1;c__OPB14;o__;f__":0.0,"k__Bacteria;p__OP8;c__OP8_1;o__OPB95;f__":0.0,"k__Bacteria;p__OP9;c__JS1;o__BA021;f__":0.0,"k__Bacteria;p__OP9;c__OPB46;o__OPB72;f__TIBD11":0.0,"k__Bacteria;p__OP9;c__OPB46;o__SHA-1;f__":26.0,"k__Bacteria;p__Proteobacteria;c__Alphaproteobacteria;__;__":0.0,"k__Bacteria;p__Proteobacteria;c__Alphaproteobacteria;o__Rhizobiales;f__Hyphomicrobiaceae":0.0,"k__Bacteria;p__Proteobacteria;c__Alphaproteobacteria;o__Rhizobiales;f__Methylobacteriaceae":0.0,"k__Bacteria;p__Proteobacteria;c__Alphaproteobacteria;o__Rhizobiales;f__Methylocystaceae":0.0,"k__Bacteria;p__Proteobacteria;c__Alphaproteobacteria;o__Rhodobacterales;f__Rhodobacteraceae":0.0,"k__Bacteria;p__Proteobacteria;c__Alphaproteobacteria;o__Rhodospirillales;f__Rhodospirillaceae":0.0,"k__Bacteria;p__Proteobacteria;c__Alphaproteobacteria;o__Sphingomonadales;__":0.0,"k__Bacteria;p__Proteobacteria;c__Betaproteobacteria;__;__":0.0,"k__Bacteria;p__Proteobacteria;c__Betaproteobacteria;o__Burkholderiales;f__Alcaligenaceae":0.0,"k__Bacteria;p__Proteobacteria;c__Betaproteobacteria;o__Burkholderiales;f__Burkholderiaceae":0.0,"k__Bacteria;p__Proteobacteria;c__Betaproteobacteria;o__Burkholderiales;f__Comamonadaceae":0.0,"k__Bacteria;p__Proteobacteria;c__Betaproteobacteria;o__Thiobacterales;f__Thiobacteraceae":0.0,"k__Bacteria;p__Proteobacteria;c__Deltaproteobacteria;__;__":19.0,"k__Bacteria;p__Proteobacteria;c__Deltaproteobacteria;o__;f__":0.0,"k__Bacteria;p__Proteobacteria;c__Deltaproteobacteria;o__Syntrophobacterales;f__Syntrophaceae":8.0,"k__Bacteria;p__Proteobacteria;c__Deltaproteobacteria;o__Syntrophobacterales;f__Syntrophorhabdaceae":0.0,"k__Bacteria;p__Proteobacteria;c__Epsilonproteobacteria;o__Campylobacterales;f__Campylobacteraceae":0.0,"k__Bacteria;p__Proteobacteria;c__Gammaproteobacteria;__;__":0.0,"k__Bacteria;p__Proteobacteria;c__Gammaproteobacteria;o__Aeromonadales;f__Aeromonadaceae":0.0,"k__Bacteria;p__Proteobacteria;c__Gammaproteobacteria;o__Aeromonadales;f__Succinivibrionaceae":0.0,"k__Bacteria;p__Proteobacteria;c__Gammaproteobacteria;o__Pseudomonadales;f__Moraxellaceae":0.0,"k__Bacteria;p__Proteobacteria;c__Gammaproteobacteria;o__Pseudomonadales;f__Pseudomonadaceae":0.0,"k__Bacteria;p__Proteobacteria;c__Gammaproteobacteria;o__Xanthomonadales;f__Xanthomonadaceae":0.0,"k__Bacteria;p__SAR406;c__AB16;o__noFP_H7;f__":0.0,"k__Bacteria;p__SR1;c__;o__;f__":39.0,"k__Bacteria;p__Spirochaetes;c__MVP-15;o__PL-11B10;f__":16.0,"k__Bacteria;p__Spirochaetes;c__Spirochaetes;o__Sphaerochaetales;f__Sphaerochaetaceae":0.0,"k__Bacteria;p__Spirochaetes;c__Spirochaetes;o__Spirochaetales;f__Spirochaetaceae":81.0,"k__Bacteria;p__Spirochaetes;c__[Leptospirae];o__[Leptospirales];f__Sediment-4":0.0,"k__Bacteria;p__Synergistetes;c__Synergistia;o__Synergistales;f__":31.0,"k__Bacteria;p__Synergistetes;c__Synergistia;o__Synergistales;f__Anaerobaculaceae":0.0,"k__Bacteria;p__Synergistetes;c__Synergistia;o__Synergistales;f__Dethiosulfovibrionaceae":0.0,"k__Bacteria;p__Synergistetes;c__Synergistia;o__Synergistales;f__Synergistaceae":33.0,"k__Bacteria;p__Synergistetes;c__Synergistia;o__Synergistales;f__Thermovirgaceae":0.0,"k__Bacteria;p__TA06;c__;o__;f__":0.0,"k__Bacteria;p__TM7;c__TM7-1;o__;f__":0.0,"k__Bacteria;p__TM7;c__TM7-3;__;__":0.0,"k__Bacteria;p__TM7;c__TM7-3;o__;f__":0.0,"k__Bacteria;p__TM7;c__TM7-3;o__CW040;f__F16":0.0,"k__Bacteria;p__TM7;c__TM7-3;o__I025;f__":0.0,"k__Bacteria;p__Tenericutes;c__Mollicutes;o__;f__":8.0,"k__Bacteria;p__Tenericutes;c__Mollicutes;o__Acholeplasmatales;f__Acholeplasmataceae":17.0,"k__Bacteria;p__Tenericutes;c__Mollicutes;o__RF39;f__":6.0,"k__Bacteria;p__Tenericutes;c__RF3;o__ML615J-28;f__":62.0,"k__Bacteria;p__Thermotogae;c__Thermotogae;o__Thermotogales;f__Thermotogaceae":5.0,"k__Bacteria;p__Verrucomicrobia;c__Verruco-5;o__LD1-PB3;f__":0.0,"k__Bacteria;p__Verrucomicrobia;c__[Pedosphaerae];o__[Pedosphaerales];f__R4-41B":0.0,"k__Bacteria;p__WPS-2;c__;o__;f__":4.0,"k__Bacteria;p__WS6;c__SC72;o__A-2AF;f__":7.0,"k__Bacteria;p__WS6;c__SC72;o__WCHB1-15;f__":16.0,"k__Bacteria;p__WWE1;c__[Cloacamonae];o__[Cloacamonales];f__":0.0,"k__Bacteria;p__WWE1;c__[Cloacamonae];o__[Cloacamonales];f__CW-1":0.0,"k__Bacteria;p__WWE1;c__[Cloacamonae];o__[Cloacamonales];f__[Cloacamonaceae]":1877.0,"plant type":"Biogas","plant no.":"#02"},{"index":"03_U341F-U806R-NW3-3","k__Archaea;p__Crenarchaeota;c__MCG;o__pGrfC26;f__":0.0,"k__Archaea;p__Euryarchaeota;c__Methanobacteria;o__Methanobacteriales;f__Methanobacteriaceae":0.0,"k__Archaea;p__Euryarchaeota;c__Methanobacteria;o__Methanobacteriales;f__WSA2":0.0,"k__Archaea;p__Euryarchaeota;c__Methanomicrobia;o__Methanomicrobiales;f__Methanomicrobiaceae":0.0,"k__Archaea;p__Euryarchaeota;c__Methanomicrobia;o__Methanomicrobiales;f__Methanoregulaceae":0.0,"k__Archaea;p__Euryarchaeota;c__Methanomicrobia;o__Methanomicrobiales;f__Methanospirillaceae":0.0,"k__Archaea;p__Euryarchaeota;c__Methanomicrobia;o__Methanosarcinales;f__Methanosaetaceae":0.0,"k__Archaea;p__Euryarchaeota;c__Methanomicrobia;o__Methanosarcinales;f__Methanosarcinaceae":1456.0,"k__Archaea;p__Euryarchaeota;c__Thermoplasmata;o__E2;f__[Methanomassiliicoccaceae]":0.0,"k__Archaea;p__[Parvarchaeota];c__[Parvarchaea];o__WCHD3-30;f__":0.0,"k__Bacteria;__;__;__;__":8.0,"k__Bacteria;p__;c__;o__;f__":213.0,"k__Bacteria;p__Acidobacteria;c__BPC102;o__MVS-40;f__":0.0,"k__Bacteria;p__Acidobacteria;c__Solibacteres;o__Solibacterales;f__AKIW659":0.0,"k__Bacteria;p__Acidobacteria;c__[Chloracidobacteria];o__RB41;f__Ellin6075":0.0,"k__Bacteria;p__Actinobacteria;c__;o__;f__":0.0,"k__Bacteria;p__Actinobacteria;c__Acidimicrobiia;o__Acidimicrobiales;f__":0.0,"k__Bacteria;p__Actinobacteria;c__Acidimicrobiia;o__Acidimicrobiales;f__C111":0.0,"k__Bacteria;p__Actinobacteria;c__Acidimicrobiia;o__Acidimicrobiales;f__Microthrixaceae":0.0,"k__Bacteria;p__Actinobacteria;c__Actinobacteria;o__Actinomycetales;__":0.0,"k__Bacteria;p__Actinobacteria;c__Actinobacteria;o__Actinomycetales;f__Corynebacteriaceae":0.0,"k__Bacteria;p__Actinobacteria;c__Actinobacteria;o__Actinomycetales;f__Dermatophilaceae":0.0,"k__Bacteria;p__Actinobacteria;c__Actinobacteria;o__Actinomycetales;f__Intrasporangiaceae":0.0,"k__Bacteria;p__Actinobacteria;c__Actinobacteria;o__Actinomycetales;f__Microbacteriaceae":0.0,"k__Bacteria;p__Actinobacteria;c__Actinobacteria;o__Actinomycetales;f__Nocardioidaceae":0.0,"k__Bacteria;p__Actinobacteria;c__Actinobacteria;o__Actinomycetales;f__Nocardiopsaceae":0.0,"k__Bacteria;p__Actinobacteria;c__Actinobacteria;o__Actinomycetales;f__Pseudonocardiaceae":0.0,"k__Bacteria;p__Actinobacteria;c__Actinobacteria;o__Actinomycetales;f__Streptomycetaceae":0.0,"k__Bacteria;p__Actinobacteria;c__Actinobacteria;o__Bifidobacteriales;f__Bifidobacteriaceae":0.0,"k__Bacteria;p__Actinobacteria;c__Actinobacteria;o__WCHB1-81;f__At425_EubF1":0.0,"k__Bacteria;p__Actinobacteria;c__Coriobacteriia;o__Coriobacteriales;f__Coriobacteriaceae":0.0,"k__Bacteria;p__Armatimonadetes;c__SJA-176;o__GAB-B06;f__":0.0,"k__Bacteria;p__Bacteroidetes;__;__;__":133.0,"k__Bacteria;p__Bacteroidetes;c__Bacteroidia;o__Bacteroidales;__":610.0,"k__Bacteria;p__Bacteroidetes;c__Bacteroidia;o__Bacteroidales;f__":92.0,"k__Bacteria;p__Bacteroidetes;c__Bacteroidia;o__Bacteroidales;f__Bacteroidaceae":125.0,"k__Bacteria;p__Bacteroidetes;c__Bacteroidia;o__Bacteroidales;f__Marinilabiaceae":70.0,"k__Bacteria;p__Bacteroidetes;c__Bacteroidia;o__Bacteroidales;f__Porphyromonadaceae":145.0,"k__Bacteria;p__Bacteroidetes;c__Bacteroidia;o__Bacteroidales;f__Prevotellaceae":0.0,"k__Bacteria;p__Bacteroidetes;c__Bacteroidia;o__Bacteroidales;f__Rikenellaceae":0.0,"k__Bacteria;p__Bacteroidetes;c__Flavobacteriia;o__Flavobacteriales;f__Flavobacteriaceae":0.0,"k__Bacteria;p__Bacteroidetes;c__Sphingobacteriia;o__Sphingobacteriales;f__Sphingobacteriaceae":7.0,"k__Bacteria;p__Bacteroidetes;c__[Saprospirae];o__[Saprospirales];f__Chitinophagaceae":0.0,"k__Bacteria;p__Bacteroidetes;c__[Saprospirae];o__[Saprospirales];f__Saprospiraceae":0.0,"k__Bacteria;p__Caldiserica;c__OP5;o__WCHB1-02;f__SHBZ1169":0.0,"k__Bacteria;p__Caldiserica;c__TTA-B1;o__;f__":0.0,"k__Bacteria;p__Chlorobi;c__Ignavibacteria;o__Ignavibacteriales;f__Ignavibacteriaceae":0.0,"k__Bacteria;p__Chlorobi;c__SJA-28;o__;f__":0.0,"k__Bacteria;p__Chloroflexi;c__;o__;f__":0.0,"k__Bacteria;p__Chloroflexi;c__Anaerolineae;o__Anaerolineales;f__Anaerolinaceae":0.0,"k__Bacteria;p__Chloroflexi;c__Anaerolineae;o__Caldilineales;f__Caldilineaceae":0.0,"k__Bacteria;p__Chloroflexi;c__Anaerolineae;o__OPB11;f__":0.0,"k__Bacteria;p__Chloroflexi;c__Anaerolineae;o__SBR1031;f__SHA-31":0.0,"k__Bacteria;p__Chloroflexi;c__Anaerolineae;o__SHA-20;f__":0.0,"k__Bacteria;p__Chloroflexi;c__Dehalococcoidetes;o__Dehalococcoidales;__":0.0,"k__Bacteria;p__Chloroflexi;c__Ellin6529;o__;f__":0.0,"k__Bacteria;p__Chloroflexi;c__TK17;o__mle1-48;f__":0.0,"k__Bacteria;p__Chloroflexi;c__Thermomicrobia;o__JG30-KF-CM45;f__":0.0,"k__Bacteria;p__Cyanobacteria;c__Chloroplast;o__Streptophyta;f__":0.0,"k__Bacteria;p__EM3;c__;o__;f__":0.0,"k__Bacteria;p__Fibrobacteres;c__Fibrobacteria;o__Fibrobacterales;f__":0.0,"k__Bacteria;p__Fibrobacteres;c__Fibrobacteria;o__Fibrobacterales;f__Fibrobacteraceae":0.0,"k__Bacteria;p__Fibrobacteres;c__TG3;o__TG3-1;f__TSCOR003-O20":5.0,"k__Bacteria;p__Firmicutes;c__Bacilli;__;__":0.0,"k__Bacteria;p__Firmicutes;c__Bacilli;o__Bacillales;__":0.0,"k__Bacteria;p__Firmicutes;c__Bacilli;o__Bacillales;f__Bacillaceae":0.0,"k__Bacteria;p__Firmicutes;c__Bacilli;o__Bacillales;f__Paenibacillaceae":0.0,"k__Bacteria;p__Firmicutes;c__Bacilli;o__Bacillales;f__Planococcaceae":0.0,"k__Bacteria;p__Firmicutes;c__Bacilli;o__Bacillales;f__Staphylococcaceae":0.0,"k__Bacteria;p__Firmicutes;c__Bacilli;o__Bacillales;f__Thermoactinomycetaceae":0.0,"k__Bacteria;p__Firmicutes;c__Bacilli;o__Haloplasmatales;f__Haloplasmataceae":0.0,"k__Bacteria;p__Firmicutes;c__Bacilli;o__Lactobacillales;f__Aerococcaceae":0.0,"k__Bacteria;p__Firmicutes;c__Bacilli;o__Lactobacillales;f__Carnobacteriaceae":0.0,"k__Bacteria;p__Firmicutes;c__Bacilli;o__Lactobacillales;f__Enterococcaceae":14.0,"k__Bacteria;p__Firmicutes;c__Bacilli;o__Lactobacillales;f__Lactobacillaceae":0.0,"k__Bacteria;p__Firmicutes;c__Bacilli;o__Lactobacillales;f__Leuconostocaceae":0.0,"k__Bacteria;p__Firmicutes;c__Bacilli;o__Lactobacillales;f__Streptococcaceae":41.0,"k__Bacteria;p__Firmicutes;c__Bacilli;o__Turicibacterales;f__Turicibacteraceae":0.0,"k__Bacteria;p__Firmicutes;c__Clostridia;__;__":248.0,"k__Bacteria;p__Firmicutes;c__Clostridia;o__;f__":0.0,"k__Bacteria;p__Firmicutes;c__Clostridia;o__BSA2B-08;f__":0.0,"k__Bacteria;p__Firmicutes;c__Clostridia;o__Clostridiales;__":139.0,"k__Bacteria;p__Firmicutes;c__Clostridia;o__Clostridiales;f__":88.0,"k__Bacteria;p__Firmicutes;c__Clostridia;o__Clostridiales;f__Caldicoprobacteraceae":437.0,"k__Bacteria;p__Firmicutes;c__Clostridia;o__Clostridiales;f__Christensenellaceae":8.0,"k__Bacteria;p__Firmicutes;c__Clostridia;o__Clostridiales;f__Clostridiaceae":203.0,"k__Bacteria;p__Firmicutes;c__Clostridia;o__Clostridiales;f__Dehalobacteriaceae":0.0,"k__Bacteria;p__Firmicutes;c__Clostridia;o__Clostridiales;f__EtOH8":24.0,"k__Bacteria;p__Firmicutes;c__Clostridia;o__Clostridiales;f__Eubacteriaceae":17.0,"k__Bacteria;p__Firmicutes;c__Clostridia;o__Clostridiales;f__Gracilibacteraceae":8.0,"k__Bacteria;p__Firmicutes;c__Clostridia;o__Clostridiales;f__Lachnospiraceae":31.0,"k__Bacteria;p__Firmicutes;c__Clostridia;o__Clostridiales;f__Peptococcaceae":24.0,"k__Bacteria;p__Firmicutes;c__Clostridia;o__Clostridiales;f__Peptostreptococcaceae":38.0,"k__Bacteria;p__Firmicutes;c__Clostridia;o__Clostridiales;f__Ruminococcaceae":282.0,"k__Bacteria;p__Firmicutes;c__Clostridia;o__Clostridiales;f__Syntrophomonadaceae":20.0,"k__Bacteria;p__Firmicutes;c__Clostridia;o__Clostridiales;f__Veillonellaceae":0.0,"k__Bacteria;p__Firmicutes;c__Clostridia;o__Clostridiales;f__[Mogibacteriaceae]":57.0,"k__Bacteria;p__Firmicutes;c__Clostridia;o__Clostridiales;f__[Tissierellaceae]":411.0,"k__Bacteria;p__Firmicutes;c__Clostridia;o__Halanaerobiales;f__Halanaerobiaceae":0.0,"k__Bacteria;p__Firmicutes;c__Clostridia;o__MBA08;f__":3861.0,"k__Bacteria;p__Firmicutes;c__Clostridia;o__Natranaerobiales;f__":9.0,"k__Bacteria;p__Firmicutes;c__Clostridia;o__Natranaerobiales;f__Anaerobrancaceae":48.0,"k__Bacteria;p__Firmicutes;c__Clostridia;o__Natranaerobiales;f__ML1228J-1":0.0,"k__Bacteria;p__Firmicutes;c__Clostridia;o__Natranaerobiales;f__YAB3B13":0.0,"k__Bacteria;p__Firmicutes;c__Clostridia;o__OPB54;f__":32.0,"k__Bacteria;p__Firmicutes;c__Clostridia;o__SHA-98;f__":1129.0,"k__Bacteria;p__Firmicutes;c__Clostridia;o__SHA-98;f__D2":79.0,"k__Bacteria;p__Firmicutes;c__Clostridia;o__Thermoanaerobacterales;f__":57.0,"k__Bacteria;p__Firmicutes;c__Clostridia;o__Thermoanaerobacterales;f__Thermoanaerobacteraceae":71.0,"k__Bacteria;p__Firmicutes;c__Clostridia;o__Thermoanaerobacterales;f__Thermodesulfobiaceae":0.0,"k__Bacteria;p__Firmicutes;c__Erysipelotrichi;o__Erysipelotrichales;f__Erysipelotrichaceae":61.0,"k__Bacteria;p__Firmicutes;c__OPB54;o__;f__":59.0,"k__Bacteria;p__NKB19;c__noFP_H4;o__;f__":0.0,"k__Bacteria;p__OD1;c__;o__;f__":0.0,"k__Bacteria;p__OD1;c__ABY1;o__;f__":0.0,"k__Bacteria;p__OP1;c__OPB14;o__;f__":0.0,"k__Bacteria;p__OP8;c__OP8_1;o__OPB95;f__":0.0,"k__Bacteria;p__OP9;c__JS1;o__BA021;f__":0.0,"k__Bacteria;p__OP9;c__OPB46;o__OPB72;f__TIBD11":32.0,"k__Bacteria;p__OP9;c__OPB46;o__SHA-1;f__":16.0,"k__Bacteria;p__Proteobacteria;c__Alphaproteobacteria;__;__":0.0,"k__Bacteria;p__Proteobacteria;c__Alphaproteobacteria;o__Rhizobiales;f__Hyphomicrobiaceae":0.0,"k__Bacteria;p__Proteobacteria;c__Alphaproteobacteria;o__Rhizobiales;f__Methylobacteriaceae":0.0,"k__Bacteria;p__Proteobacteria;c__Alphaproteobacteria;o__Rhizobiales;f__Methylocystaceae":0.0,"k__Bacteria;p__Proteobacteria;c__Alphaproteobacteria;o__Rhodobacterales;f__Rhodobacteraceae":0.0,"k__Bacteria;p__Proteobacteria;c__Alphaproteobacteria;o__Rhodospirillales;f__Rhodospirillaceae":0.0,"k__Bacteria;p__Proteobacteria;c__Alphaproteobacteria;o__Sphingomonadales;__":0.0,"k__Bacteria;p__Proteobacteria;c__Betaproteobacteria;__;__":0.0,"k__Bacteria;p__Proteobacteria;c__Betaproteobacteria;o__Burkholderiales;f__Alcaligenaceae":0.0,"k__Bacteria;p__Proteobacteria;c__Betaproteobacteria;o__Burkholderiales;f__Burkholderiaceae":0.0,"k__Bacteria;p__Proteobacteria;c__Betaproteobacteria;o__Burkholderiales;f__Comamonadaceae":0.0,"k__Bacteria;p__Proteobacteria;c__Betaproteobacteria;o__Thiobacterales;f__Thiobacteraceae":0.0,"k__Bacteria;p__Proteobacteria;c__Deltaproteobacteria;__;__":0.0,"k__Bacteria;p__Proteobacteria;c__Deltaproteobacteria;o__;f__":0.0,"k__Bacteria;p__Proteobacteria;c__Deltaproteobacteria;o__Syntrophobacterales;f__Syntrophaceae":0.0,"k__Bacteria;p__Proteobacteria;c__Deltaproteobacteria;o__Syntrophobacterales;f__Syntrophorhabdaceae":0.0,"k__Bacteria;p__Proteobacteria;c__Epsilonproteobacteria;o__Campylobacterales;f__Campylobacteraceae":0.0,"k__Bacteria;p__Proteobacteria;c__Gammaproteobacteria;__;__":0.0,"k__Bacteria;p__Proteobacteria;c__Gammaproteobacteria;o__Aeromonadales;f__Aeromonadaceae":0.0,"k__Bacteria;p__Proteobacteria;c__Gammaproteobacteria;o__Aeromonadales;f__Succinivibrionaceae":0.0,"k__Bacteria;p__Proteobacteria;c__Gammaproteobacteria;o__Pseudomonadales;f__Moraxellaceae":0.0,"k__Bacteria;p__Proteobacteria;c__Gammaproteobacteria;o__Pseudomonadales;f__Pseudomonadaceae":0.0,"k__Bacteria;p__Proteobacteria;c__Gammaproteobacteria;o__Xanthomonadales;f__Xanthomonadaceae":0.0,"k__Bacteria;p__SAR406;c__AB16;o__noFP_H7;f__":0.0,"k__Bacteria;p__SR1;c__;o__;f__":114.0,"k__Bacteria;p__Spirochaetes;c__MVP-15;o__PL-11B10;f__":0.0,"k__Bacteria;p__Spirochaetes;c__Spirochaetes;o__Sphaerochaetales;f__Sphaerochaetaceae":0.0,"k__Bacteria;p__Spirochaetes;c__Spirochaetes;o__Spirochaetales;f__Spirochaetaceae":20.0,"k__Bacteria;p__Spirochaetes;c__[Leptospirae];o__[Leptospirales];f__Sediment-4":0.0,"k__Bacteria;p__Synergistetes;c__Synergistia;o__Synergistales;f__":22.0,"k__Bacteria;p__Synergistetes;c__Synergistia;o__Synergistales;f__Anaerobaculaceae":59.0,"k__Bacteria;p__Synergistetes;c__Synergistia;o__Synergistales;f__Dethiosulfovibrionaceae":0.0,"k__Bacteria;p__Synergistetes;c__Synergistia;o__Synergistales;f__Synergistaceae":2.0,"k__Bacteria;p__Synergistetes;c__Synergistia;o__Synergistales;f__Thermovirgaceae":0.0,"k__Bacteria;p__TA06;c__;o__;f__":0.0,"k__Bacteria;p__TM7;c__TM7-1;o__;f__":0.0,"k__Bacteria;p__TM7;c__TM7-3;__;__":0.0,"k__Bacteria;p__TM7;c__TM7-3;o__;f__":0.0,"k__Bacteria;p__TM7;c__TM7-3;o__CW040;f__F16":0.0,"k__Bacteria;p__TM7;c__TM7-3;o__I025;f__":0.0,"k__Bacteria;p__Tenericutes;c__Mollicutes;o__;f__":0.0,"k__Bacteria;p__Tenericutes;c__Mollicutes;o__Acholeplasmatales;f__Acholeplasmataceae":23.0,"k__Bacteria;p__Tenericutes;c__Mollicutes;o__RF39;f__":0.0,"k__Bacteria;p__Tenericutes;c__RF3;o__ML615J-28;f__":60.0,"k__Bacteria;p__Thermotogae;c__Thermotogae;o__Thermotogales;f__Thermotogaceae":0.0,"k__Bacteria;p__Verrucomicrobia;c__Verruco-5;o__LD1-PB3;f__":0.0,"k__Bacteria;p__Verrucomicrobia;c__[Pedosphaerae];o__[Pedosphaerales];f__R4-41B":0.0,"k__Bacteria;p__WPS-2;c__;o__;f__":0.0,"k__Bacteria;p__WS6;c__SC72;o__A-2AF;f__":0.0,"k__Bacteria;p__WS6;c__SC72;o__WCHB1-15;f__":0.0,"k__Bacteria;p__WWE1;c__[Cloacamonae];o__[Cloacamonales];f__":0.0,"k__Bacteria;p__WWE1;c__[Cloacamonae];o__[Cloacamonales];f__CW-1":0.0,"k__Bacteria;p__WWE1;c__[Cloacamonae];o__[Cloacamonales];f__[Cloacamonaceae]":1051.0,"plant type":"Biogas","plant no.":"#02"},{"index":"04_U341F-U806R-NW3-4","k__Archaea;p__Crenarchaeota;c__MCG;o__pGrfC26;f__":0.0,"k__Archaea;p__Euryarchaeota;c__Methanobacteria;o__Methanobacteriales;f__Methanobacteriaceae":66.0,"k__Archaea;p__Euryarchaeota;c__Methanobacteria;o__Methanobacteriales;f__WSA2":0.0,"k__Archaea;p__Euryarchaeota;c__Methanomicrobia;o__Methanomicrobiales;f__Methanomicrobiaceae":0.0,"k__Archaea;p__Euryarchaeota;c__Methanomicrobia;o__Methanomicrobiales;f__Methanoregulaceae":0.0,"k__Archaea;p__Euryarchaeota;c__Methanomicrobia;o__Methanomicrobiales;f__Methanospirillaceae":0.0,"k__Archaea;p__Euryarchaeota;c__Methanomicrobia;o__Methanosarcinales;f__Methanosaetaceae":0.0,"k__Archaea;p__Euryarchaeota;c__Methanomicrobia;o__Methanosarcinales;f__Methanosarcinaceae":37.0,"k__Archaea;p__Euryarchaeota;c__Thermoplasmata;o__E2;f__[Methanomassiliicoccaceae]":0.0,"k__Archaea;p__[Parvarchaeota];c__[Parvarchaea];o__WCHD3-30;f__":0.0,"k__Bacteria;__;__;__;__":118.0,"k__Bacteria;p__;c__;o__;f__":372.0,"k__Bacteria;p__Acidobacteria;c__BPC102;o__MVS-40;f__":0.0,"k__Bacteria;p__Acidobacteria;c__Solibacteres;o__Solibacterales;f__AKIW659":0.0,"k__Bacteria;p__Acidobacteria;c__[Chloracidobacteria];o__RB41;f__Ellin6075":0.0,"k__Bacteria;p__Actinobacteria;c__;o__;f__":0.0,"k__Bacteria;p__Actinobacteria;c__Acidimicrobiia;o__Acidimicrobiales;f__":0.0,"k__Bacteria;p__Actinobacteria;c__Acidimicrobiia;o__Acidimicrobiales;f__C111":0.0,"k__Bacteria;p__Actinobacteria;c__Acidimicrobiia;o__Acidimicrobiales;f__Microthrixaceae":0.0,"k__Bacteria;p__Actinobacteria;c__Actinobacteria;o__Actinomycetales;__":0.0,"k__Bacteria;p__Actinobacteria;c__Actinobacteria;o__Actinomycetales;f__Corynebacteriaceae":0.0,"k__Bacteria;p__Actinobacteria;c__Actinobacteria;o__Actinomycetales;f__Dermatophilaceae":0.0,"k__Bacteria;p__Actinobacteria;c__Actinobacteria;o__Actinomycetales;f__Intrasporangiaceae":0.0,"k__Bacteria;p__Actinobacteria;c__Actinobacteria;o__Actinomycetales;f__Microbacteriaceae":0.0,"k__Bacteria;p__Actinobacteria;c__Actinobacteria;o__Actinomycetales;f__Nocardioidaceae":0.0,"k__Bacteria;p__Actinobacteria;c__Actinobacteria;o__Actinomycetales;f__Nocardiopsaceae":0.0,"k__Bacteria;p__Actinobacteria;c__Actinobacteria;o__Actinomycetales;f__Pseudonocardiaceae":0.0,"k__Bacteria;p__Actinobacteria;c__Actinobacteria;o__Actinomycetales;f__Streptomycetaceae":0.0,"k__Bacteria;p__Actinobacteria;c__Actinobacteria;o__Bifidobacteriales;f__Bifidobacteriaceae":102.0,"k__Bacteria;p__Actinobacteria;c__Actinobacteria;o__WCHB1-81;f__At425_EubF1":0.0,"k__Bacteria;p__Actinobacteria;c__Coriobacteriia;o__Coriobacteriales;f__Coriobacteriaceae":13.0,"k__Bacteria;p__Armatimonadetes;c__SJA-176;o__GAB-B06;f__":0.0,"k__Bacteria;p__Bacteroidetes;__;__;__":1788.0,"k__Bacteria;p__Bacteroidetes;c__Bacteroidia;o__Bacteroidales;__":253.0,"k__Bacteria;p__Bacteroidetes;c__Bacteroidia;o__Bacteroidales;f__":1003.0,"k__Bacteria;p__Bacteroidetes;c__Bacteroidia;o__Bacteroidales;f__Bacteroidaceae":329.0,"k__Bacteria;p__Bacteroidetes;c__Bacteroidia;o__Bacteroidales;f__Marinilabiaceae":8.0,"k__Bacteria;p__Bacteroidetes;c__Bacteroidia;o__Bacteroidales;f__Porphyromonadaceae":664.0,"k__Bacteria;p__Bacteroidetes;c__Bacteroidia;o__Bacteroidales;f__Prevotellaceae":0.0,"k__Bacteria;p__Bacteroidetes;c__Bacteroidia;o__Bacteroidales;f__Rikenellaceae":0.0,"k__Bacteria;p__Bacteroidetes;c__Flavobacteriia;o__Flavobacteriales;f__Flavobacteriaceae":0.0,"k__Bacteria;p__Bacteroidetes;c__Sphingobacteriia;o__Sphingobacteriales;f__Sphingobacteriaceae":0.0,"k__Bacteria;p__Bacteroidetes;c__[Saprospirae];o__[Saprospirales];f__Chitinophagaceae":0.0,"k__Bacteria;p__Bacteroidetes;c__[Saprospirae];o__[Saprospirales];f__Saprospiraceae":0.0,"k__Bacteria;p__Caldiserica;c__OP5;o__WCHB1-02;f__SHBZ1169":0.0,"k__Bacteria;p__Caldiserica;c__TTA-B1;o__;f__":0.0,"k__Bacteria;p__Chlorobi;c__Ignavibacteria;o__Ignavibacteriales;f__Ignavibacteriaceae":0.0,"k__Bacteria;p__Chlorobi;c__SJA-28;o__;f__":0.0,"k__Bacteria;p__Chloroflexi;c__;o__;f__":0.0,"k__Bacteria;p__Chloroflexi;c__Anaerolineae;o__Anaerolineales;f__Anaerolinaceae":0.0,"k__Bacteria;p__Chloroflexi;c__Anaerolineae;o__Caldilineales;f__Caldilineaceae":0.0,"k__Bacteria;p__Chloroflexi;c__Anaerolineae;o__OPB11;f__":0.0,"k__Bacteria;p__Chloroflexi;c__Anaerolineae;o__SBR1031;f__SHA-31":0.0,"k__Bacteria;p__Chloroflexi;c__Anaerolineae;o__SHA-20;f__":0.0,"k__Bacteria;p__Chloroflexi;c__Dehalococcoidetes;o__Dehalococcoidales;__":0.0,"k__Bacteria;p__Chloroflexi;c__Ellin6529;o__;f__":0.0,"k__Bacteria;p__Chloroflexi;c__TK17;o__mle1-48;f__":0.0,"k__Bacteria;p__Chloroflexi;c__Thermomicrobia;o__JG30-KF-CM45;f__":0.0,"k__Bacteria;p__Cyanobacteria;c__Chloroplast;o__Streptophyta;f__":0.0,"k__Bacteria;p__EM3;c__;o__;f__":0.0,"k__Bacteria;p__Fibrobacteres;c__Fibrobacteria;o__Fibrobacterales;f__":0.0,"k__Bacteria;p__Fibrobacteres;c__Fibrobacteria;o__Fibrobacterales;f__Fibrobacteraceae":10.0,"k__Bacteria;p__Fibrobacteres;c__TG3;o__TG3-1;f__TSCOR003-O20":0.0,"k__Bacteria;p__Firmicutes;c__Bacilli;__;__":23.0,"k__Bacteria;p__Firmicutes;c__Bacilli;o__Bacillales;__":10.0,"k__Bacteria;p__Firmicutes;c__Bacilli;o__Bacillales;f__Bacillaceae":27.0,"k__Bacteria;p__Firmicutes;c__Bacilli;o__Bacillales;f__Paenibacillaceae":5.0,"k__Bacteria;p__Firmicutes;c__Bacilli;o__Bacillales;f__Planococcaceae":17.0,"k__Bacteria;p__Firmicutes;c__Bacilli;o__Bacillales;f__Staphylococcaceae":0.0,"k__Bacteria;p__Firmicutes;c__Bacilli;o__Bacillales;f__Thermoactinomycetaceae":0.0,"k__Bacteria;p__Firmicutes;c__Bacilli;o__Haloplasmatales;f__Haloplasmataceae":0.0,"k__Bacteria;p__Firmicutes;c__Bacilli;o__Lactobacillales;f__Aerococcaceae":7.0,"k__Bacteria;p__Firmicutes;c__Bacilli;o__Lactobacillales;f__Carnobacteriaceae":0.0,"k__Bacteria;p__Firmicutes;c__Bacilli;o__Lactobacillales;f__Enterococcaceae":48.0,"k__Bacteria;p__Firmicutes;c__Bacilli;o__Lactobacillales;f__Lactobacillaceae":13.0,"k__Bacteria;p__Firmicutes;c__Bacilli;o__Lactobacillales;f__Leuconostocaceae":10.0,"k__Bacteria;p__Firmicutes;c__Bacilli;o__Lactobacillales;f__Streptococcaceae":989.0,"k__Bacteria;p__Firmicutes;c__Bacilli;o__Turicibacterales;f__Turicibacteraceae":0.0,"k__Bacteria;p__Firmicutes;c__Clostridia;__;__":31.0,"k__Bacteria;p__Firmicutes;c__Clostridia;o__;f__":0.0,"k__Bacteria;p__Firmicutes;c__Clostridia;o__BSA2B-08;f__":0.0,"k__Bacteria;p__Firmicutes;c__Clostridia;o__Clostridiales;__":493.0,"k__Bacteria;p__Firmicutes;c__Clostridia;o__Clostridiales;f__":157.0,"k__Bacteria;p__Firmicutes;c__Clostridia;o__Clostridiales;f__Caldicoprobacteraceae":570.0,"k__Bacteria;p__Firmicutes;c__Clostridia;o__Clostridiales;f__Christensenellaceae":0.0,"k__Bacteria;p__Firmicutes;c__Clostridia;o__Clostridiales;f__Clostridiaceae":425.0,"k__Bacteria;p__Firmicutes;c__Clostridia;o__Clostridiales;f__Dehalobacteriaceae":12.0,"k__Bacteria;p__Firmicutes;c__Clostridia;o__Clostridiales;f__EtOH8":22.0,"k__Bacteria;p__Firmicutes;c__Clostridia;o__Clostridiales;f__Eubacteriaceae":119.0,"k__Bacteria;p__Firmicutes;c__Clostridia;o__Clostridiales;f__Gracilibacteraceae":18.0,"k__Bacteria;p__Firmicutes;c__Clostridia;o__Clostridiales;f__Lachnospiraceae":9.0,"k__Bacteria;p__Firmicutes;c__Clostridia;o__Clostridiales;f__Peptococcaceae":182.0,"k__Bacteria;p__Firmicutes;c__Clostridia;o__Clostridiales;f__Peptostreptococcaceae":61.0,"k__Bacteria;p__Firmicutes;c__Clostridia;o__Clostridiales;f__Ruminococcaceae":263.0,"k__Bacteria;p__Firmicutes;c__Clostridia;o__Clostridiales;f__Syntrophomonadaceae":265.0,"k__Bacteria;p__Firmicutes;c__Clostridia;o__Clostridiales;f__Veillonellaceae":25.0,"k__Bacteria;p__Firmicutes;c__Clostridia;o__Clostridiales;f__[Mogibacteriaceae]":83.0,"k__Bacteria;p__Firmicutes;c__Clostridia;o__Clostridiales;f__[Tissierellaceae]":899.0,"k__Bacteria;p__Firmicutes;c__Clostridia;o__Halanaerobiales;f__Halanaerobiaceae":16.0,"k__Bacteria;p__Firmicutes;c__Clostridia;o__MBA08;f__":278.0,"k__Bacteria;p__Firmicutes;c__Clostridia;o__Natranaerobiales;f__":0.0,"k__Bacteria;p__Firmicutes;c__Clostridia;o__Natranaerobiales;f__Anaerobrancaceae":95.0,"k__Bacteria;p__Firmicutes;c__Clostridia;o__Natranaerobiales;f__ML1228J-1":0.0,"k__Bacteria;p__Firmicutes;c__Clostridia;o__Natranaerobiales;f__YAB3B13":0.0,"k__Bacteria;p__Firmicutes;c__Clostridia;o__OPB54;f__":8.0,"k__Bacteria;p__Firmicutes;c__Clostridia;o__SHA-98;f__":179.0,"k__Bacteria;p__Firmicutes;c__Clostridia;o__SHA-98;f__D2":45.0,"k__Bacteria;p__Firmicutes;c__Clostridia;o__Thermoanaerobacterales;f__":42.0,"k__Bacteria;p__Firmicutes;c__Clostridia;o__Thermoanaerobacterales;f__Thermoanaerobacteraceae":306.0,"k__Bacteria;p__Firmicutes;c__Clostridia;o__Thermoanaerobacterales;f__Thermodesulfobiaceae":0.0,"k__Bacteria;p__Firmicutes;c__Erysipelotrichi;o__Erysipelotrichales;f__Erysipelotrichaceae":384.0,"k__Bacteria;p__Firmicutes;c__OPB54;o__;f__":47.0,"k__Bacteria;p__NKB19;c__noFP_H4;o__;f__":0.0,"k__Bacteria;p__OD1;c__;o__;f__":0.0,"k__Bacteria;p__OD1;c__ABY1;o__;f__":0.0,"k__Bacteria;p__OP1;c__OPB14;o__;f__":0.0,"k__Bacteria;p__OP8;c__OP8_1;o__OPB95;f__":0.0,"k__Bacteria;p__OP9;c__JS1;o__BA021;f__":0.0,"k__Bacteria;p__OP9;c__OPB46;o__OPB72;f__TIBD11":0.0,"k__Bacteria;p__OP9;c__OPB46;o__SHA-1;f__":0.0,"k__Bacteria;p__Proteobacteria;c__Alphaproteobacteria;__;__":0.0,"k__Bacteria;p__Proteobacteria;c__Alphaproteobacteria;o__Rhizobiales;f__Hyphomicrobiaceae":0.0,"k__Bacteria;p__Proteobacteria;c__Alphaproteobacteria;o__Rhizobiales;f__Methylobacteriaceae":0.0,"k__Bacteria;p__Proteobacteria;c__Alphaproteobacteria;o__Rhizobiales;f__Methylocystaceae":0.0,"k__Bacteria;p__Proteobacteria;c__Alphaproteobacteria;o__Rhodobacterales;f__Rhodobacteraceae":0.0,"k__Bacteria;p__Proteobacteria;c__Alphaproteobacteria;o__Rhodospirillales;f__Rhodospirillaceae":0.0,"k__Bacteria;p__Proteobacteria;c__Alphaproteobacteria;o__Sphingomonadales;__":0.0,"k__Bacteria;p__Proteobacteria;c__Betaproteobacteria;__;__":0.0,"k__Bacteria;p__Proteobacteria;c__Betaproteobacteria;o__Burkholderiales;f__Alcaligenaceae":9.0,"k__Bacteria;p__Proteobacteria;c__Betaproteobacteria;o__Burkholderiales;f__Burkholderiaceae":0.0,"k__Bacteria;p__Proteobacteria;c__Betaproteobacteria;o__Burkholderiales;f__Comamonadaceae":0.0,"k__Bacteria;p__Proteobacteria;c__Betaproteobacteria;o__Thiobacterales;f__Thiobacteraceae":0.0,"k__Bacteria;p__Proteobacteria;c__Deltaproteobacteria;__;__":0.0,"k__Bacteria;p__Proteobacteria;c__Deltaproteobacteria;o__;f__":0.0,"k__Bacteria;p__Proteobacteria;c__Deltaproteobacteria;o__Syntrophobacterales;f__Syntrophaceae":0.0,"k__Bacteria;p__Proteobacteria;c__Deltaproteobacteria;o__Syntrophobacterales;f__Syntrophorhabdaceae":0.0,"k__Bacteria;p__Proteobacteria;c__Epsilonproteobacteria;o__Campylobacterales;f__Campylobacteraceae":0.0,"k__Bacteria;p__Proteobacteria;c__Gammaproteobacteria;__;__":8.0,"k__Bacteria;p__Proteobacteria;c__Gammaproteobacteria;o__Aeromonadales;f__Aeromonadaceae":0.0,"k__Bacteria;p__Proteobacteria;c__Gammaproteobacteria;o__Aeromonadales;f__Succinivibrionaceae":15.0,"k__Bacteria;p__Proteobacteria;c__Gammaproteobacteria;o__Pseudomonadales;f__Moraxellaceae":0.0,"k__Bacteria;p__Proteobacteria;c__Gammaproteobacteria;o__Pseudomonadales;f__Pseudomonadaceae":12.0,"k__Bacteria;p__Proteobacteria;c__Gammaproteobacteria;o__Xanthomonadales;f__Xanthomonadaceae":0.0,"k__Bacteria;p__SAR406;c__AB16;o__noFP_H7;f__":0.0,"k__Bacteria;p__SR1;c__;o__;f__":61.0,"k__Bacteria;p__Spirochaetes;c__MVP-15;o__PL-11B10;f__":0.0,"k__Bacteria;p__Spirochaetes;c__Spirochaetes;o__Sphaerochaetales;f__Sphaerochaetaceae":0.0,"k__Bacteria;p__Spirochaetes;c__Spirochaetes;o__Spirochaetales;f__Spirochaetaceae":0.0,"k__Bacteria;p__Spirochaetes;c__[Leptospirae];o__[Leptospirales];f__Sediment-4":0.0,"k__Bacteria;p__Synergistetes;c__Synergistia;o__Synergistales;f__":41.0,"k__Bacteria;p__Synergistetes;c__Synergistia;o__Synergistales;f__Anaerobaculaceae":0.0,"k__Bacteria;p__Synergistetes;c__Synergistia;o__Synergistales;f__Dethiosulfovibrionaceae":0.0,"k__Bacteria;p__Synergistetes;c__Synergistia;o__Synergistales;f__Synergistaceae":22.0,"k__Bacteria;p__Synergistetes;c__Synergistia;o__Synergistales;f__Thermovirgaceae":0.0,"k__Bacteria;p__TA06;c__;o__;f__":0.0,"k__Bacteria;p__TM7;c__TM7-1;o__;f__":0.0,"k__Bacteria;p__TM7;c__TM7-3;__;__":0.0,"k__Bacteria;p__TM7;c__TM7-3;o__;f__":0.0,"k__Bacteria;p__TM7;c__TM7-3;o__CW040;f__F16":0.0,"k__Bacteria;p__TM7;c__TM7-3;o__I025;f__":0.0,"k__Bacteria;p__Tenericutes;c__Mollicutes;o__;f__":18.0,"k__Bacteria;p__Tenericutes;c__Mollicutes;o__Acholeplasmatales;f__Acholeplasmataceae":88.0,"k__Bacteria;p__Tenericutes;c__Mollicutes;o__RF39;f__":6.0,"k__Bacteria;p__Tenericutes;c__RF3;o__ML615J-28;f__":192.0,"k__Bacteria;p__Thermotogae;c__Thermotogae;o__Thermotogales;f__Thermotogaceae":173.0,"k__Bacteria;p__Verrucomicrobia;c__Verruco-5;o__LD1-PB3;f__":0.0,"k__Bacteria;p__Verrucomicrobia;c__[Pedosphaerae];o__[Pedosphaerales];f__R4-41B":0.0,"k__Bacteria;p__WPS-2;c__;o__;f__":0.0,"k__Bacteria;p__WS6;c__SC72;o__A-2AF;f__":0.0,"k__Bacteria;p__WS6;c__SC72;o__WCHB1-15;f__":0.0,"k__Bacteria;p__WWE1;c__[Cloacamonae];o__[Cloacamonales];f__":20.0,"k__Bacteria;p__WWE1;c__[Cloacamonae];o__[Cloacamonales];f__CW-1":8.0,"k__Bacteria;p__WWE1;c__[Cloacamonae];o__[Cloacamonales];f__[Cloacamonaceae]":76.0,"plant type":"Biogas","plant no.":"#04"},{"index":"05_U341F-U806R-NW3-5","k__Archaea;p__Crenarchaeota;c__MCG;o__pGrfC26;f__":0.0,"k__Archaea;p__Euryarchaeota;c__Methanobacteria;o__Methanobacteriales;f__Methanobacteriaceae":0.0,"k__Archaea;p__Euryarchaeota;c__Methanobacteria;o__Methanobacteriales;f__WSA2":0.0,"k__Archaea;p__Euryarchaeota;c__Methanomicrobia;o__Methanomicrobiales;f__Methanomicrobiaceae":0.0,"k__Archaea;p__Euryarchaeota;c__Methanomicrobia;o__Methanomicrobiales;f__Methanoregulaceae":0.0,"k__Archaea;p__Euryarchaeota;c__Methanomicrobia;o__Methanomicrobiales;f__Methanospirillaceae":0.0,"k__Archaea;p__Euryarchaeota;c__Methanomicrobia;o__Methanosarcinales;f__Methanosaetaceae":0.0,"k__Archaea;p__Euryarchaeota;c__Methanomicrobia;o__Methanosarcinales;f__Methanosarcinaceae":0.0,"k__Archaea;p__Euryarchaeota;c__Thermoplasmata;o__E2;f__[Methanomassiliicoccaceae]":0.0,"k__Archaea;p__[Parvarchaeota];c__[Parvarchaea];o__WCHD3-30;f__":0.0,"k__Bacteria;__;__;__;__":52.0,"k__Bacteria;p__;c__;o__;f__":28.0,"k__Bacteria;p__Acidobacteria;c__BPC102;o__MVS-40;f__":0.0,"k__Bacteria;p__Acidobacteria;c__Solibacteres;o__Solibacterales;f__AKIW659":0.0,"k__Bacteria;p__Acidobacteria;c__[Chloracidobacteria];o__RB41;f__Ellin6075":0.0,"k__Bacteria;p__Actinobacteria;c__;o__;f__":0.0,"k__Bacteria;p__Actinobacteria;c__Acidimicrobiia;o__Acidimicrobiales;f__":0.0,"k__Bacteria;p__Actinobacteria;c__Acidimicrobiia;o__Acidimicrobiales;f__C111":0.0,"k__Bacteria;p__Actinobacteria;c__Acidimicrobiia;o__Acidimicrobiales;f__Microthrixaceae":0.0,"k__Bacteria;p__Actinobacteria;c__Actinobacteria;o__Actinomycetales;__":0.0,"k__Bacteria;p__Actinobacteria;c__Actinobacteria;o__Actinomycetales;f__Corynebacteriaceae":0.0,"k__Bacteria;p__Actinobacteria;c__Actinobacteria;o__Actinomycetales;f__Dermatophilaceae":0.0,"k__Bacteria;p__Actinobacteria;c__Actinobacteria;o__Actinomycetales;f__Intrasporangiaceae":0.0,"k__Bacteria;p__Actinobacteria;c__Actinobacteria;o__Actinomycetales;f__Microbacteriaceae":0.0,"k__Bacteria;p__Actinobacteria;c__Actinobacteria;o__Actinomycetales;f__Nocardioidaceae":0.0,"k__Bacteria;p__Actinobacteria;c__Actinobacteria;o__Actinomycetales;f__Nocardiopsaceae":0.0,"k__Bacteria;p__Actinobacteria;c__Actinobacteria;o__Actinomycetales;f__Pseudonocardiaceae":0.0,"k__Bacteria;p__Actinobacteria;c__Actinobacteria;o__Actinomycetales;f__Streptomycetaceae":0.0,"k__Bacteria;p__Actinobacteria;c__Actinobacteria;o__Bifidobacteriales;f__Bifidobacteriaceae":0.0,"k__Bacteria;p__Actinobacteria;c__Actinobacteria;o__WCHB1-81;f__At425_EubF1":0.0,"k__Bacteria;p__Actinobacteria;c__Coriobacteriia;o__Coriobacteriales;f__Coriobacteriaceae":0.0,"k__Bacteria;p__Armatimonadetes;c__SJA-176;o__GAB-B06;f__":0.0,"k__Bacteria;p__Bacteroidetes;__;__;__":181.0,"k__Bacteria;p__Bacteroidetes;c__Bacteroidia;o__Bacteroidales;__":31.0,"k__Bacteria;p__Bacteroidetes;c__Bacteroidia;o__Bacteroidales;f__":69.0,"k__Bacteria;p__Bacteroidetes;c__Bacteroidia;o__Bacteroidales;f__Bacteroidaceae":43.0,"k__Bacteria;p__Bacteroidetes;c__Bacteroidia;o__Bacteroidales;f__Marinilabiaceae":15.0,"k__Bacteria;p__Bacteroidetes;c__Bacteroidia;o__Bacteroidales;f__Porphyromonadaceae":75.0,"k__Bacteria;p__Bacteroidetes;c__Bacteroidia;o__Bacteroidales;f__Prevotellaceae":0.0,"k__Bacteria;p__Bacteroidetes;c__Bacteroidia;o__Bacteroidales;f__Rikenellaceae":0.0,"k__Bacteria;p__Bacteroidetes;c__Flavobacteriia;o__Flavobacteriales;f__Flavobacteriaceae":0.0,"k__Bacteria;p__Bacteroidetes;c__Sphingobacteriia;o__Sphingobacteriales;f__Sphingobacteriaceae":0.0,"k__Bacteria;p__Bacteroidetes;c__[Saprospirae];o__[Saprospirales];f__Chitinophagaceae":0.0,"k__Bacteria;p__Bacteroidetes;c__[Saprospirae];o__[Saprospirales];f__Saprospiraceae":0.0,"k__Bacteria;p__Caldiserica;c__OP5;o__WCHB1-02;f__SHBZ1169":0.0,"k__Bacteria;p__Caldiserica;c__TTA-B1;o__;f__":0.0,"k__Bacteria;p__Chlorobi;c__Ignavibacteria;o__Ignavibacteriales;f__Ignavibacteriaceae":0.0,"k__Bacteria;p__Chlorobi;c__SJA-28;o__;f__":0.0,"k__Bacteria;p__Chloroflexi;c__;o__;f__":0.0,"k__Bacteria;p__Chloroflexi;c__Anaerolineae;o__Anaerolineales;f__Anaerolinaceae":0.0,"k__Bacteria;p__Chloroflexi;c__Anaerolineae;o__Caldilineales;f__Caldilineaceae":0.0,"k__Bacteria;p__Chloroflexi;c__Anaerolineae;o__OPB11;f__":0.0,"k__Bacteria;p__Chloroflexi;c__Anaerolineae;o__SBR1031;f__SHA-31":0.0,"k__Bacteria;p__Chloroflexi;c__Anaerolineae;o__SHA-20;f__":0.0,"k__Bacteria;p__Chloroflexi;c__Dehalococcoidetes;o__Dehalococcoidales;__":0.0,"k__Bacteria;p__Chloroflexi;c__Ellin6529;o__;f__":0.0,"k__Bacteria;p__Chloroflexi;c__TK17;o__mle1-48;f__":0.0,"k__Bacteria;p__Chloroflexi;c__Thermomicrobia;o__JG30-KF-CM45;f__":0.0,"k__Bacteria;p__Cyanobacteria;c__Chloroplast;o__Streptophyta;f__":0.0,"k__Bacteria;p__EM3;c__;o__;f__":0.0,"k__Bacteria;p__Fibrobacteres;c__Fibrobacteria;o__Fibrobacterales;f__":0.0,"k__Bacteria;p__Fibrobacteres;c__Fibrobacteria;o__Fibrobacterales;f__Fibrobacteraceae":0.0,"k__Bacteria;p__Fibrobacteres;c__TG3;o__TG3-1;f__TSCOR003-O20":0.0,"k__Bacteria;p__Firmicutes;c__Bacilli;__;__":0.0,"k__Bacteria;p__Firmicutes;c__Bacilli;o__Bacillales;__":0.0,"k__Bacteria;p__Firmicutes;c__Bacilli;o__Bacillales;f__Bacillaceae":0.0,"k__Bacteria;p__Firmicutes;c__Bacilli;o__Bacillales;f__Paenibacillaceae":0.0,"k__Bacteria;p__Firmicutes;c__Bacilli;o__Bacillales;f__Planococcaceae":0.0,"k__Bacteria;p__Firmicutes;c__Bacilli;o__Bacillales;f__Staphylococcaceae":0.0,"k__Bacteria;p__Firmicutes;c__Bacilli;o__Bacillales;f__Thermoactinomycetaceae":0.0,"k__Bacteria;p__Firmicutes;c__Bacilli;o__Haloplasmatales;f__Haloplasmataceae":0.0,"k__Bacteria;p__Firmicutes;c__Bacilli;o__Lactobacillales;f__Aerococcaceae":0.0,"k__Bacteria;p__Firmicutes;c__Bacilli;o__Lactobacillales;f__Carnobacteriaceae":0.0,"k__Bacteria;p__Firmicutes;c__Bacilli;o__Lactobacillales;f__Enterococcaceae":0.0,"k__Bacteria;p__Firmicutes;c__Bacilli;o__Lactobacillales;f__Lactobacillaceae":0.0,"k__Bacteria;p__Firmicutes;c__Bacilli;o__Lactobacillales;f__Leuconostocaceae":0.0,"k__Bacteria;p__Firmicutes;c__Bacilli;o__Lactobacillales;f__Streptococcaceae":56.0,"k__Bacteria;p__Firmicutes;c__Bacilli;o__Turicibacterales;f__Turicibacteraceae":0.0,"k__Bacteria;p__Firmicutes;c__Clostridia;__;__":209.0,"k__Bacteria;p__Firmicutes;c__Clostridia;o__;f__":0.0,"k__Bacteria;p__Firmicutes;c__Clostridia;o__BSA2B-08;f__":0.0,"k__Bacteria;p__Firmicutes;c__Clostridia;o__Clostridiales;__":122.0,"k__Bacteria;p__Firmicutes;c__Clostridia;o__Clostridiales;f__":29.0,"k__Bacteria;p__Firmicutes;c__Clostridia;o__Clostridiales;f__Caldicoprobacteraceae":446.0,"k__Bacteria;p__Firmicutes;c__Clostridia;o__Clostridiales;f__Christensenellaceae":0.0,"k__Bacteria;p__Firmicutes;c__Clostridia;o__Clostridiales;f__Clostridiaceae":196.0,"k__Bacteria;p__Firmicutes;c__Clostridia;o__Clostridiales;f__Dehalobacteriaceae":0.0,"k__Bacteria;p__Firmicutes;c__Clostridia;o__Clostridiales;f__EtOH8":0.0,"k__Bacteria;p__Firmicutes;c__Clostridia;o__Clostridiales;f__Eubacteriaceae":0.0,"k__Bacteria;p__Firmicutes;c__Clostridia;o__Clostridiales;f__Gracilibacteraceae":0.0,"k__Bacteria;p__Firmicutes;c__Clostridia;o__Clostridiales;f__Lachnospiraceae":59.0,"k__Bacteria;p__Firmicutes;c__Clostridia;o__Clostridiales;f__Peptococcaceae":42.0,"k__Bacteria;p__Firmicutes;c__Clostridia;o__Clostridiales;f__Peptostreptococcaceae":0.0,"k__Bacteria;p__Firmicutes;c__Clostridia;o__Clostridiales;f__Ruminococcaceae":258.0,"k__Bacteria;p__Firmicutes;c__Clostridia;o__Clostridiales;f__Syntrophomonadaceae":39.0,"k__Bacteria;p__Firmicutes;c__Clostridia;o__Clostridiales;f__Veillonellaceae":0.0,"k__Bacteria;p__Firmicutes;c__Clostridia;o__Clostridiales;f__[Mogibacteriaceae]":11.0,"k__Bacteria;p__Firmicutes;c__Clostridia;o__Clostridiales;f__[Tissierellaceae]":482.0,"k__Bacteria;p__Firmicutes;c__Clostridia;o__Halanaerobiales;f__Halanaerobiaceae":145.0,"k__Bacteria;p__Firmicutes;c__Clostridia;o__MBA08;f__":2230.0,"k__Bacteria;p__Firmicutes;c__Clostridia;o__Natranaerobiales;f__":0.0,"k__Bacteria;p__Firmicutes;c__Clostridia;o__Natranaerobiales;f__Anaerobrancaceae":0.0,"k__Bacteria;p__Firmicutes;c__Clostridia;o__Natranaerobiales;f__ML1228J-1":0.0,"k__Bacteria;p__Firmicutes;c__Clostridia;o__Natranaerobiales;f__YAB3B13":0.0,"k__Bacteria;p__Firmicutes;c__Clostridia;o__OPB54;f__":20.0,"k__Bacteria;p__Firmicutes;c__Clostridia;o__SHA-98;f__":231.0,"k__Bacteria;p__Firmicutes;c__Clostridia;o__SHA-98;f__D2":0.0,"k__Bacteria;p__Firmicutes;c__Clostridia;o__Thermoanaerobacterales;f__":42.0,"k__Bacteria;p__Firmicutes;c__Clostridia;o__Thermoanaerobacterales;f__Thermoanaerobacteraceae":82.0,"k__Bacteria;p__Firmicutes;c__Clostridia;o__Thermoanaerobacterales;f__Thermodesulfobiaceae":0.0,"k__Bacteria;p__Firmicutes;c__Erysipelotrichi;o__Erysipelotrichales;f__Erysipelotrichaceae":195.0,"k__Bacteria;p__Firmicutes;c__OPB54;o__;f__":34.0,"k__Bacteria;p__NKB19;c__noFP_H4;o__;f__":0.0,"k__Bacteria;p__OD1;c__;o__;f__":0.0,"k__Bacteria;p__OD1;c__ABY1;o__;f__":0.0,"k__Bacteria;p__OP1;c__OPB14;o__;f__":0.0,"k__Bacteria;p__OP8;c__OP8_1;o__OPB95;f__":0.0,"k__Bacteria;p__OP9;c__JS1;o__BA021;f__":0.0,"k__Bacteria;p__OP9;c__OPB46;o__OPB72;f__TIBD11":9.0,"k__Bacteria;p__OP9;c__OPB46;o__SHA-1;f__":0.0,"k__Bacteria;p__Proteobacteria;c__Alphaproteobacteria;__;__":0.0,"k__Bacteria;p__Proteobacteria;c__Alphaproteobacteria;o__Rhizobiales;f__Hyphomicrobiaceae":0.0,"k__Bacteria;p__Proteobacteria;c__Alphaproteobacteria;o__Rhizobiales;f__Methylobacteriaceae":0.0,"k__Bacteria;p__Proteobacteria;c__Alphaproteobacteria;o__Rhizobiales;f__Methylocystaceae":0.0,"k__Bacteria;p__Proteobacteria;c__Alphaproteobacteria;o__Rhodobacterales;f__Rhodobacteraceae":0.0,"k__Bacteria;p__Proteobacteria;c__Alphaproteobacteria;o__Rhodospirillales;f__Rhodospirillaceae":0.0,"k__Bacteria;p__Proteobacteria;c__Alphaproteobacteria;o__Sphingomonadales;__":0.0,"k__Bacteria;p__Proteobacteria;c__Betaproteobacteria;__;__":0.0,"k__Bacteria;p__Proteobacteria;c__Betaproteobacteria;o__Burkholderiales;f__Alcaligenaceae":0.0,"k__Bacteria;p__Proteobacteria;c__Betaproteobacteria;o__Burkholderiales;f__Burkholderiaceae":0.0,"k__Bacteria;p__Proteobacteria;c__Betaproteobacteria;o__Burkholderiales;f__Comamonadaceae":0.0,"k__Bacteria;p__Proteobacteria;c__Betaproteobacteria;o__Thiobacterales;f__Thiobacteraceae":0.0,"k__Bacteria;p__Proteobacteria;c__Deltaproteobacteria;__;__":0.0,"k__Bacteria;p__Proteobacteria;c__Deltaproteobacteria;o__;f__":0.0,"k__Bacteria;p__Proteobacteria;c__Deltaproteobacteria;o__Syntrophobacterales;f__Syntrophaceae":0.0,"k__Bacteria;p__Proteobacteria;c__Deltaproteobacteria;o__Syntrophobacterales;f__Syntrophorhabdaceae":0.0,"k__Bacteria;p__Proteobacteria;c__Epsilonproteobacteria;o__Campylobacterales;f__Campylobacteraceae":0.0,"k__Bacteria;p__Proteobacteria;c__Gammaproteobacteria;__;__":0.0,"k__Bacteria;p__Proteobacteria;c__Gammaproteobacteria;o__Aeromonadales;f__Aeromonadaceae":0.0,"k__Bacteria;p__Proteobacteria;c__Gammaproteobacteria;o__Aeromonadales;f__Succinivibrionaceae":0.0,"k__Bacteria;p__Proteobacteria;c__Gammaproteobacteria;o__Pseudomonadales;f__Moraxellaceae":0.0,"k__Bacteria;p__Proteobacteria;c__Gammaproteobacteria;o__Pseudomonadales;f__Pseudomonadaceae":0.0,"k__Bacteria;p__Proteobacteria;c__Gammaproteobacteria;o__Xanthomonadales;f__Xanthomonadaceae":0.0,"k__Bacteria;p__SAR406;c__AB16;o__noFP_H7;f__":0.0,"k__Bacteria;p__SR1;c__;o__;f__":19.0,"k__Bacteria;p__Spirochaetes;c__MVP-15;o__PL-11B10;f__":0.0,"k__Bacteria;p__Spirochaetes;c__Spirochaetes;o__Sphaerochaetales;f__Sphaerochaetaceae":0.0,"k__Bacteria;p__Spirochaetes;c__Spirochaetes;o__Spirochaetales;f__Spirochaetaceae":60.0,"k__Bacteria;p__Spirochaetes;c__[Leptospirae];o__[Leptospirales];f__Sediment-4":0.0,"k__Bacteria;p__Synergistetes;c__Synergistia;o__Synergistales;f__":0.0,"k__Bacteria;p__Synergistetes;c__Synergistia;o__Synergistales;f__Anaerobaculaceae":0.0,"k__Bacteria;p__Synergistetes;c__Synergistia;o__Synergistales;f__Dethiosulfovibrionaceae":0.0,"k__Bacteria;p__Synergistetes;c__Synergistia;o__Synergistales;f__Synergistaceae":0.0,"k__Bacteria;p__Synergistetes;c__Synergistia;o__Synergistales;f__Thermovirgaceae":0.0,"k__Bacteria;p__TA06;c__;o__;f__":0.0,"k__Bacteria;p__TM7;c__TM7-1;o__;f__":0.0,"k__Bacteria;p__TM7;c__TM7-3;__;__":0.0,"k__Bacteria;p__TM7;c__TM7-3;o__;f__":0.0,"k__Bacteria;p__TM7;c__TM7-3;o__CW040;f__F16":0.0,"k__Bacteria;p__TM7;c__TM7-3;o__I025;f__":0.0,"k__Bacteria;p__Tenericutes;c__Mollicutes;o__;f__":0.0,"k__Bacteria;p__Tenericutes;c__Mollicutes;o__Acholeplasmatales;f__Acholeplasmataceae":86.0,"k__Bacteria;p__Tenericutes;c__Mollicutes;o__RF39;f__":0.0,"k__Bacteria;p__Tenericutes;c__RF3;o__ML615J-28;f__":52.0,"k__Bacteria;p__Thermotogae;c__Thermotogae;o__Thermotogales;f__Thermotogaceae":0.0,"k__Bacteria;p__Verrucomicrobia;c__Verruco-5;o__LD1-PB3;f__":0.0,"k__Bacteria;p__Verrucomicrobia;c__[Pedosphaerae];o__[Pedosphaerales];f__R4-41B":0.0,"k__Bacteria;p__WPS-2;c__;o__;f__":0.0,"k__Bacteria;p__WS6;c__SC72;o__A-2AF;f__":0.0,"k__Bacteria;p__WS6;c__SC72;o__WCHB1-15;f__":0.0,"k__Bacteria;p__WWE1;c__[Cloacamonae];o__[Cloacamonales];f__":0.0,"k__Bacteria;p__WWE1;c__[Cloacamonae];o__[Cloacamonales];f__CW-1":0.0,"k__Bacteria;p__WWE1;c__[Cloacamonae];o__[Cloacamonales];f__[Cloacamonaceae]":59.0,"plant type":"Biogas","plant no.":"#05"},{"index":"06_U341F-U806R-NW3-6","k__Archaea;p__Crenarchaeota;c__MCG;o__pGrfC26;f__":13.0,"k__Archaea;p__Euryarchaeota;c__Methanobacteria;o__Methanobacteriales;f__Methanobacteriaceae":3.0,"k__Archaea;p__Euryarchaeota;c__Methanobacteria;o__Methanobacteriales;f__WSA2":5.0,"k__Archaea;p__Euryarchaeota;c__Methanomicrobia;o__Methanomicrobiales;f__Methanomicrobiaceae":0.0,"k__Archaea;p__Euryarchaeota;c__Methanomicrobia;o__Methanomicrobiales;f__Methanoregulaceae":0.0,"k__Archaea;p__Euryarchaeota;c__Methanomicrobia;o__Methanomicrobiales;f__Methanospirillaceae":0.0,"k__Archaea;p__Euryarchaeota;c__Methanomicrobia;o__Methanosarcinales;f__Methanosaetaceae":1081.0,"k__Archaea;p__Euryarchaeota;c__Methanomicrobia;o__Methanosarcinales;f__Methanosarcinaceae":0.0,"k__Archaea;p__Euryarchaeota;c__Thermoplasmata;o__E2;f__[Methanomassiliicoccaceae]":0.0,"k__Archaea;p__[Parvarchaeota];c__[Parvarchaea];o__WCHD3-30;f__":0.0,"k__Bacteria;__;__;__;__":145.0,"k__Bacteria;p__;c__;o__;f__":310.0,"k__Bacteria;p__Acidobacteria;c__BPC102;o__MVS-40;f__":17.0,"k__Bacteria;p__Acidobacteria;c__Solibacteres;o__Solibacterales;f__AKIW659":0.0,"k__Bacteria;p__Acidobacteria;c__[Chloracidobacteria];o__RB41;f__Ellin6075":0.0,"k__Bacteria;p__Actinobacteria;c__;o__;f__":0.0,"k__Bacteria;p__Actinobacteria;c__Acidimicrobiia;o__Acidimicrobiales;f__":0.0,"k__Bacteria;p__Actinobacteria;c__Acidimicrobiia;o__Acidimicrobiales;f__C111":0.0,"k__Bacteria;p__Actinobacteria;c__Acidimicrobiia;o__Acidimicrobiales;f__Microthrixaceae":0.0,"k__Bacteria;p__Actinobacteria;c__Actinobacteria;o__Actinomycetales;__":0.0,"k__Bacteria;p__Actinobacteria;c__Actinobacteria;o__Actinomycetales;f__Corynebacteriaceae":24.0,"k__Bacteria;p__Actinobacteria;c__Actinobacteria;o__Actinomycetales;f__Dermatophilaceae":0.0,"k__Bacteria;p__Actinobacteria;c__Actinobacteria;o__Actinomycetales;f__Intrasporangiaceae":0.0,"k__Bacteria;p__Actinobacteria;c__Actinobacteria;o__Actinomycetales;f__Microbacteriaceae":0.0,"k__Bacteria;p__Actinobacteria;c__Actinobacteria;o__Actinomycetales;f__Nocardioidaceae":0.0,"k__Bacteria;p__Actinobacteria;c__Actinobacteria;o__Actinomycetales;f__Nocardiopsaceae":0.0,"k__Bacteria;p__Actinobacteria;c__Actinobacteria;o__Actinomycetales;f__Pseudonocardiaceae":0.0,"k__Bacteria;p__Actinobacteria;c__Actinobacteria;o__Actinomycetales;f__Streptomycetaceae":0.0,"k__Bacteria;p__Actinobacteria;c__Actinobacteria;o__Bifidobacteriales;f__Bifidobacteriaceae":0.0,"k__Bacteria;p__Actinobacteria;c__Actinobacteria;o__WCHB1-81;f__At425_EubF1":0.0,"k__Bacteria;p__Actinobacteria;c__Coriobacteriia;o__Coriobacteriales;f__Coriobacteriaceae":37.0,"k__Bacteria;p__Armatimonadetes;c__SJA-176;o__GAB-B06;f__":0.0,"k__Bacteria;p__Bacteroidetes;__;__;__":10.0,"k__Bacteria;p__Bacteroidetes;c__Bacteroidia;o__Bacteroidales;__":0.0,"k__Bacteria;p__Bacteroidetes;c__Bacteroidia;o__Bacteroidales;f__":1339.0,"k__Bacteria;p__Bacteroidetes;c__Bacteroidia;o__Bacteroidales;f__Bacteroidaceae":757.0,"k__Bacteria;p__Bacteroidetes;c__Bacteroidia;o__Bacteroidales;f__Marinilabiaceae":167.0,"k__Bacteria;p__Bacteroidetes;c__Bacteroidia;o__Bacteroidales;f__Porphyromonadaceae":158.0,"k__Bacteria;p__Bacteroidetes;c__Bacteroidia;o__Bacteroidales;f__Prevotellaceae":0.0,"k__Bacteria;p__Bacteroidetes;c__Bacteroidia;o__Bacteroidales;f__Rikenellaceae":0.0,"k__Bacteria;p__Bacteroidetes;c__Flavobacteriia;o__Flavobacteriales;f__Flavobacteriaceae":0.0,"k__Bacteria;p__Bacteroidetes;c__Sphingobacteriia;o__Sphingobacteriales;f__Sphingobacteriaceae":0.0,"k__Bacteria;p__Bacteroidetes;c__[Saprospirae];o__[Saprospirales];f__Chitinophagaceae":0.0,"k__Bacteria;p__Bacteroidetes;c__[Saprospirae];o__[Saprospirales];f__Saprospiraceae":0.0,"k__Bacteria;p__Caldiserica;c__OP5;o__WCHB1-02;f__SHBZ1169":0.0,"k__Bacteria;p__Caldiserica;c__TTA-B1;o__;f__":0.0,"k__Bacteria;p__Chlorobi;c__Ignavibacteria;o__Ignavibacteriales;f__Ignavibacteriaceae":0.0,"k__Bacteria;p__Chlorobi;c__SJA-28;o__;f__":0.0,"k__Bacteria;p__Chloroflexi;c__;o__;f__":0.0,"k__Bacteria;p__Chloroflexi;c__Anaerolineae;o__Anaerolineales;f__Anaerolinaceae":0.0,"k__Bacteria;p__Chloroflexi;c__Anaerolineae;o__Caldilineales;f__Caldilineaceae":0.0,"k__Bacteria;p__Chloroflexi;c__Anaerolineae;o__OPB11;f__":0.0,"k__Bacteria;p__Chloroflexi;c__Anaerolineae;o__SBR1031;f__SHA-31":0.0,"k__Bacteria;p__Chloroflexi;c__Anaerolineae;o__SHA-20;f__":0.0,"k__Bacteria;p__Chloroflexi;c__Dehalococcoidetes;o__Dehalococcoidales;__":8.0,"k__Bacteria;p__Chloroflexi;c__Ellin6529;o__;f__":0.0,"k__Bacteria;p__Chloroflexi;c__TK17;o__mle1-48;f__":0.0,"k__Bacteria;p__Chloroflexi;c__Thermomicrobia;o__JG30-KF-CM45;f__":0.0,"k__Bacteria;p__Cyanobacteria;c__Chloroplast;o__Streptophyta;f__":0.0,"k__Bacteria;p__EM3;c__;o__;f__":0.0,"k__Bacteria;p__Fibrobacteres;c__Fibrobacteria;o__Fibrobacterales;f__":0.0,"k__Bacteria;p__Fibrobacteres;c__Fibrobacteria;o__Fibrobacterales;f__Fibrobacteraceae":7.0,"k__Bacteria;p__Fibrobacteres;c__TG3;o__TG3-1;f__TSCOR003-O20":50.0,"k__Bacteria;p__Firmicutes;c__Bacilli;__;__":0.0,"k__Bacteria;p__Firmicutes;c__Bacilli;o__Bacillales;__":0.0,"k__Bacteria;p__Firmicutes;c__Bacilli;o__Bacillales;f__Bacillaceae":0.0,"k__Bacteria;p__Firmicutes;c__Bacilli;o__Bacillales;f__Paenibacillaceae":0.0,"k__Bacteria;p__Firmicutes;c__Bacilli;o__Bacillales;f__Planococcaceae":0.0,"k__Bacteria;p__Firmicutes;c__Bacilli;o__Bacillales;f__Staphylococcaceae":0.0,"k__Bacteria;p__Firmicutes;c__Bacilli;o__Bacillales;f__Thermoactinomycetaceae":0.0,"k__Bacteria;p__Firmicutes;c__Bacilli;o__Haloplasmatales;f__Haloplasmataceae":0.0,"k__Bacteria;p__Firmicutes;c__Bacilli;o__Lactobacillales;f__Aerococcaceae":16.0,"k__Bacteria;p__Firmicutes;c__Bacilli;o__Lactobacillales;f__Carnobacteriaceae":0.0,"k__Bacteria;p__Firmicutes;c__Bacilli;o__Lactobacillales;f__Enterococcaceae":0.0,"k__Bacteria;p__Firmicutes;c__Bacilli;o__Lactobacillales;f__Lactobacillaceae":0.0,"k__Bacteria;p__Firmicutes;c__Bacilli;o__Lactobacillales;f__Leuconostocaceae":0.0,"k__Bacteria;p__Firmicutes;c__Bacilli;o__Lactobacillales;f__Streptococcaceae":11.0,"k__Bacteria;p__Firmicutes;c__Bacilli;o__Turicibacterales;f__Turicibacteraceae":13.0,"k__Bacteria;p__Firmicutes;c__Clostridia;__;__":4.0,"k__Bacteria;p__Firmicutes;c__Clostridia;o__;f__":0.0,"k__Bacteria;p__Firmicutes;c__Clostridia;o__BSA2B-08;f__":0.0,"k__Bacteria;p__Firmicutes;c__Clostridia;o__Clostridiales;__":494.0,"k__Bacteria;p__Firmicutes;c__Clostridia;o__Clostridiales;f__":326.0,"k__Bacteria;p__Firmicutes;c__Clostridia;o__Clostridiales;f__Caldicoprobacteraceae":396.0,"k__Bacteria;p__Firmicutes;c__Clostridia;o__Clostridiales;f__Christensenellaceae":0.0,"k__Bacteria;p__Firmicutes;c__Clostridia;o__Clostridiales;f__Clostridiaceae":1262.0,"k__Bacteria;p__Firmicutes;c__Clostridia;o__Clostridiales;f__Dehalobacteriaceae":10.0,"k__Bacteria;p__Firmicutes;c__Clostridia;o__Clostridiales;f__EtOH8":0.0,"k__Bacteria;p__Firmicutes;c__Clostridia;o__Clostridiales;f__Eubacteriaceae":0.0,"k__Bacteria;p__Firmicutes;c__Clostridia;o__Clostridiales;f__Gracilibacteraceae":54.0,"k__Bacteria;p__Firmicutes;c__Clostridia;o__Clostridiales;f__Lachnospiraceae":0.0,"k__Bacteria;p__Firmicutes;c__Clostridia;o__Clostridiales;f__Peptococcaceae":61.0,"k__Bacteria;p__Firmicutes;c__Clostridia;o__Clostridiales;f__Peptostreptococcaceae":142.0,"k__Bacteria;p__Firmicutes;c__Clostridia;o__Clostridiales;f__Ruminococcaceae":909.0,"k__Bacteria;p__Firmicutes;c__Clostridia;o__Clostridiales;f__Syntrophomonadaceae":129.0,"k__Bacteria;p__Firmicutes;c__Clostridia;o__Clostridiales;f__Veillonellaceae":0.0,"k__Bacteria;p__Firmicutes;c__Clostridia;o__Clostridiales;f__[Mogibacteriaceae]":87.0,"k__Bacteria;p__Firmicutes;c__Clostridia;o__Clostridiales;f__[Tissierellaceae]":688.0,"k__Bacteria;p__Firmicutes;c__Clostridia;o__Halanaerobiales;f__Halanaerobiaceae":0.0,"k__Bacteria;p__Firmicutes;c__Clostridia;o__MBA08;f__":1219.0,"k__Bacteria;p__Firmicutes;c__Clostridia;o__Natranaerobiales;f__":0.0,"k__Bacteria;p__Firmicutes;c__Clostridia;o__Natranaerobiales;f__Anaerobrancaceae":0.0,"k__Bacteria;p__Firmicutes;c__Clostridia;o__Natranaerobiales;f__ML1228J-1":0.0,"k__Bacteria;p__Firmicutes;c__Clostridia;o__Natranaerobiales;f__YAB3B13":8.0,"k__Bacteria;p__Firmicutes;c__Clostridia;o__OPB54;f__":9.0,"k__Bacteria;p__Firmicutes;c__Clostridia;o__SHA-98;f__":12.0,"k__Bacteria;p__Firmicutes;c__Clostridia;o__SHA-98;f__D2":32.0,"k__Bacteria;p__Firmicutes;c__Clostridia;o__Thermoanaerobacterales;f__":17.0,"k__Bacteria;p__Firmicutes;c__Clostridia;o__Thermoanaerobacterales;f__Thermoanaerobacteraceae":0.0,"k__Bacteria;p__Firmicutes;c__Clostridia;o__Thermoanaerobacterales;f__Thermodesulfobiaceae":0.0,"k__Bacteria;p__Firmicutes;c__Erysipelotrichi;o__Erysipelotrichales;f__Erysipelotrichaceae":29.0,"k__Bacteria;p__Firmicutes;c__OPB54;o__;f__":3.0,"k__Bacteria;p__NKB19;c__noFP_H4;o__;f__":0.0,"k__Bacteria;p__OD1;c__;o__;f__":0.0,"k__Bacteria;p__OD1;c__ABY1;o__;f__":12.0,"k__Bacteria;p__OP1;c__OPB14;o__;f__":0.0,"k__Bacteria;p__OP8;c__OP8_1;o__OPB95;f__":0.0,"k__Bacteria;p__OP9;c__JS1;o__BA021;f__":0.0,"k__Bacteria;p__OP9;c__OPB46;o__OPB72;f__TIBD11":0.0,"k__Bacteria;p__OP9;c__OPB46;o__SHA-1;f__":21.0,"k__Bacteria;p__Proteobacteria;c__Alphaproteobacteria;__;__":0.0,"k__Bacteria;p__Proteobacteria;c__Alphaproteobacteria;o__Rhizobiales;f__Hyphomicrobiaceae":0.0,"k__Bacteria;p__Proteobacteria;c__Alphaproteobacteria;o__Rhizobiales;f__Methylobacteriaceae":0.0,"k__Bacteria;p__Proteobacteria;c__Alphaproteobacteria;o__Rhizobiales;f__Methylocystaceae":0.0,"k__Bacteria;p__Proteobacteria;c__Alphaproteobacteria;o__Rhodobacterales;f__Rhodobacteraceae":0.0,"k__Bacteria;p__Proteobacteria;c__Alphaproteobacteria;o__Rhodospirillales;f__Rhodospirillaceae":0.0,"k__Bacteria;p__Proteobacteria;c__Alphaproteobacteria;o__Sphingomonadales;__":0.0,"k__Bacteria;p__Proteobacteria;c__Betaproteobacteria;__;__":0.0,"k__Bacteria;p__Proteobacteria;c__Betaproteobacteria;o__Burkholderiales;f__Alcaligenaceae":0.0,"k__Bacteria;p__Proteobacteria;c__Betaproteobacteria;o__Burkholderiales;f__Burkholderiaceae":0.0,"k__Bacteria;p__Proteobacteria;c__Betaproteobacteria;o__Burkholderiales;f__Comamonadaceae":0.0,"k__Bacteria;p__Proteobacteria;c__Betaproteobacteria;o__Thiobacterales;f__Thiobacteraceae":0.0,"k__Bacteria;p__Proteobacteria;c__Deltaproteobacteria;__;__":0.0,"k__Bacteria;p__Proteobacteria;c__Deltaproteobacteria;o__;f__":0.0,"k__Bacteria;p__Proteobacteria;c__Deltaproteobacteria;o__Syntrophobacterales;f__Syntrophaceae":0.0,"k__Bacteria;p__Proteobacteria;c__Deltaproteobacteria;o__Syntrophobacterales;f__Syntrophorhabdaceae":0.0,"k__Bacteria;p__Proteobacteria;c__Epsilonproteobacteria;o__Campylobacterales;f__Campylobacteraceae":15.0,"k__Bacteria;p__Proteobacteria;c__Gammaproteobacteria;__;__":0.0,"k__Bacteria;p__Proteobacteria;c__Gammaproteobacteria;o__Aeromonadales;f__Aeromonadaceae":0.0,"k__Bacteria;p__Proteobacteria;c__Gammaproteobacteria;o__Aeromonadales;f__Succinivibrionaceae":0.0,"k__Bacteria;p__Proteobacteria;c__Gammaproteobacteria;o__Pseudomonadales;f__Moraxellaceae":0.0,"k__Bacteria;p__Proteobacteria;c__Gammaproteobacteria;o__Pseudomonadales;f__Pseudomonadaceae":0.0,"k__Bacteria;p__Proteobacteria;c__Gammaproteobacteria;o__Xanthomonadales;f__Xanthomonadaceae":0.0,"k__Bacteria;p__SAR406;c__AB16;o__noFP_H7;f__":0.0,"k__Bacteria;p__SR1;c__;o__;f__":277.0,"k__Bacteria;p__Spirochaetes;c__MVP-15;o__PL-11B10;f__":0.0,"k__Bacteria;p__Spirochaetes;c__Spirochaetes;o__Sphaerochaetales;f__Sphaerochaetaceae":0.0,"k__Bacteria;p__Spirochaetes;c__Spirochaetes;o__Spirochaetales;f__Spirochaetaceae":63.0,"k__Bacteria;p__Spirochaetes;c__[Leptospirae];o__[Leptospirales];f__Sediment-4":0.0,"k__Bacteria;p__Synergistetes;c__Synergistia;o__Synergistales;f__":41.0,"k__Bacteria;p__Synergistetes;c__Synergistia;o__Synergistales;f__Anaerobaculaceae":0.0,"k__Bacteria;p__Synergistetes;c__Synergistia;o__Synergistales;f__Dethiosulfovibrionaceae":8.0,"k__Bacteria;p__Synergistetes;c__Synergistia;o__Synergistales;f__Synergistaceae":49.0,"k__Bacteria;p__Synergistetes;c__Synergistia;o__Synergistales;f__Thermovirgaceae":6.0,"k__Bacteria;p__TA06;c__;o__;f__":0.0,"k__Bacteria;p__TM7;c__TM7-1;o__;f__":0.0,"k__Bacteria;p__TM7;c__TM7-3;__;__":0.0,"k__Bacteria;p__TM7;c__TM7-3;o__;f__":0.0,"k__Bacteria;p__TM7;c__TM7-3;o__CW040;f__F16":8.0,"k__Bacteria;p__TM7;c__TM7-3;o__I025;f__":0.0,"k__Bacteria;p__Tenericutes;c__Mollicutes;o__;f__":9.0,"k__Bacteria;p__Tenericutes;c__Mollicutes;o__Acholeplasmatales;f__Acholeplasmataceae":136.0,"k__Bacteria;p__Tenericutes;c__Mollicutes;o__RF39;f__":0.0,"k__Bacteria;p__Tenericutes;c__RF3;o__ML615J-28;f__":212.0,"k__Bacteria;p__Thermotogae;c__Thermotogae;o__Thermotogales;f__Thermotogaceae":0.0,"k__Bacteria;p__Verrucomicrobia;c__Verruco-5;o__LD1-PB3;f__":14.0,"k__Bacteria;p__Verrucomicrobia;c__[Pedosphaerae];o__[Pedosphaerales];f__R4-41B":13.0,"k__Bacteria;p__WPS-2;c__;o__;f__":11.0,"k__Bacteria;p__WS6;c__SC72;o__A-2AF;f__":0.0,"k__Bacteria;p__WS6;c__SC72;o__WCHB1-15;f__":6.0,"k__Bacteria;p__WWE1;c__[Cloacamonae];o__[Cloacamonales];f__":0.0,"k__Bacteria;p__WWE1;c__[Cloacamonae];o__[Cloacamonales];f__CW-1":0.0,"k__Bacteria;p__WWE1;c__[Cloacamonae];o__[Cloacamonales];f__[Cloacamonaceae]":861.0,"plant type":"Biogas","plant no.":"#06"},{"index":"07_U341F-U806R-NW3-8","k__Archaea;p__Crenarchaeota;c__MCG;o__pGrfC26;f__":0.0,"k__Archaea;p__Euryarchaeota;c__Methanobacteria;o__Methanobacteriales;f__Methanobacteriaceae":0.0,"k__Archaea;p__Euryarchaeota;c__Methanobacteria;o__Methanobacteriales;f__WSA2":0.0,"k__Archaea;p__Euryarchaeota;c__Methanomicrobia;o__Methanomicrobiales;f__Methanomicrobiaceae":0.0,"k__Archaea;p__Euryarchaeota;c__Methanomicrobia;o__Methanomicrobiales;f__Methanoregulaceae":0.0,"k__Archaea;p__Euryarchaeota;c__Methanomicrobia;o__Methanomicrobiales;f__Methanospirillaceae":0.0,"k__Archaea;p__Euryarchaeota;c__Methanomicrobia;o__Methanosarcinales;f__Methanosaetaceae":0.0,"k__Archaea;p__Euryarchaeota;c__Methanomicrobia;o__Methanosarcinales;f__Methanosarcinaceae":100.0,"k__Archaea;p__Euryarchaeota;c__Thermoplasmata;o__E2;f__[Methanomassiliicoccaceae]":0.0,"k__Archaea;p__[Parvarchaeota];c__[Parvarchaea];o__WCHD3-30;f__":0.0,"k__Bacteria;__;__;__;__":19.0,"k__Bacteria;p__;c__;o__;f__":91.0,"k__Bacteria;p__Acidobacteria;c__BPC102;o__MVS-40;f__":0.0,"k__Bacteria;p__Acidobacteria;c__Solibacteres;o__Solibacterales;f__AKIW659":0.0,"k__Bacteria;p__Acidobacteria;c__[Chloracidobacteria];o__RB41;f__Ellin6075":0.0,"k__Bacteria;p__Actinobacteria;c__;o__;f__":0.0,"k__Bacteria;p__Actinobacteria;c__Acidimicrobiia;o__Acidimicrobiales;f__":0.0,"k__Bacteria;p__Actinobacteria;c__Acidimicrobiia;o__Acidimicrobiales;f__C111":0.0,"k__Bacteria;p__Actinobacteria;c__Acidimicrobiia;o__Acidimicrobiales;f__Microthrixaceae":0.0,"k__Bacteria;p__Actinobacteria;c__Actinobacteria;o__Actinomycetales;__":0.0,"k__Bacteria;p__Actinobacteria;c__Actinobacteria;o__Actinomycetales;f__Corynebacteriaceae":0.0,"k__Bacteria;p__Actinobacteria;c__Actinobacteria;o__Actinomycetales;f__Dermatophilaceae":0.0,"k__Bacteria;p__Actinobacteria;c__Actinobacteria;o__Actinomycetales;f__Intrasporangiaceae":0.0,"k__Bacteria;p__Actinobacteria;c__Actinobacteria;o__Actinomycetales;f__Microbacteriaceae":0.0,"k__Bacteria;p__Actinobacteria;c__Actinobacteria;o__Actinomycetales;f__Nocardioidaceae":0.0,"k__Bacteria;p__Actinobacteria;c__Actinobacteria;o__Actinomycetales;f__Nocardiopsaceae":0.0,"k__Bacteria;p__Actinobacteria;c__Actinobacteria;o__Actinomycetales;f__Pseudonocardiaceae":0.0,"k__Bacteria;p__Actinobacteria;c__Actinobacteria;o__Actinomycetales;f__Streptomycetaceae":0.0,"k__Bacteria;p__Actinobacteria;c__Actinobacteria;o__Bifidobacteriales;f__Bifidobacteriaceae":0.0,"k__Bacteria;p__Actinobacteria;c__Actinobacteria;o__WCHB1-81;f__At425_EubF1":0.0,"k__Bacteria;p__Actinobacteria;c__Coriobacteriia;o__Coriobacteriales;f__Coriobacteriaceae":0.0,"k__Bacteria;p__Armatimonadetes;c__SJA-176;o__GAB-B06;f__":0.0,"k__Bacteria;p__Bacteroidetes;__;__;__":851.0,"k__Bacteria;p__Bacteroidetes;c__Bacteroidia;o__Bacteroidales;__":1655.0,"k__Bacteria;p__Bacteroidetes;c__Bacteroidia;o__Bacteroidales;f__":62.0,"k__Bacteria;p__Bacteroidetes;c__Bacteroidia;o__Bacteroidales;f__Bacteroidaceae":8.0,"k__Bacteria;p__Bacteroidetes;c__Bacteroidia;o__Bacteroidales;f__Marinilabiaceae":32.0,"k__Bacteria;p__Bacteroidetes;c__Bacteroidia;o__Bacteroidales;f__Porphyromonadaceae":17.0,"k__Bacteria;p__Bacteroidetes;c__Bacteroidia;o__Bacteroidales;f__Prevotellaceae":0.0,"k__Bacteria;p__Bacteroidetes;c__Bacteroidia;o__Bacteroidales;f__Rikenellaceae":0.0,"k__Bacteria;p__Bacteroidetes;c__Flavobacteriia;o__Flavobacteriales;f__Flavobacteriaceae":0.0,"k__Bacteria;p__Bacteroidetes;c__Sphingobacteriia;o__Sphingobacteriales;f__Sphingobacteriaceae":0.0,"k__Bacteria;p__Bacteroidetes;c__[Saprospirae];o__[Saprospirales];f__Chitinophagaceae":0.0,"k__Bacteria;p__Bacteroidetes;c__[Saprospirae];o__[Saprospirales];f__Saprospiraceae":0.0,"k__Bacteria;p__Caldiserica;c__OP5;o__WCHB1-02;f__SHBZ1169":0.0,"k__Bacteria;p__Caldiserica;c__TTA-B1;o__;f__":0.0,"k__Bacteria;p__Chlorobi;c__Ignavibacteria;o__Ignavibacteriales;f__Ignavibacteriaceae":0.0,"k__Bacteria;p__Chlorobi;c__SJA-28;o__;f__":0.0,"k__Bacteria;p__Chloroflexi;c__;o__;f__":0.0,"k__Bacteria;p__Chloroflexi;c__Anaerolineae;o__Anaerolineales;f__Anaerolinaceae":0.0,"k__Bacteria;p__Chloroflexi;c__Anaerolineae;o__Caldilineales;f__Caldilineaceae":0.0,"k__Bacteria;p__Chloroflexi;c__Anaerolineae;o__OPB11;f__":0.0,"k__Bacteria;p__Chloroflexi;c__Anaerolineae;o__SBR1031;f__SHA-31":0.0,"k__Bacteria;p__Chloroflexi;c__Anaerolineae;o__SHA-20;f__":0.0,"k__Bacteria;p__Chloroflexi;c__Dehalococcoidetes;o__Dehalococcoidales;__":0.0,"k__Bacteria;p__Chloroflexi;c__Ellin6529;o__;f__":0.0,"k__Bacteria;p__Chloroflexi;c__TK17;o__mle1-48;f__":0.0,"k__Bacteria;p__Chloroflexi;c__Thermomicrobia;o__JG30-KF-CM45;f__":0.0,"k__Bacteria;p__Cyanobacteria;c__Chloroplast;o__Streptophyta;f__":0.0,"k__Bacteria;p__EM3;c__;o__;f__":0.0,"k__Bacteria;p__Fibrobacteres;c__Fibrobacteria;o__Fibrobacterales;f__":0.0,"k__Bacteria;p__Fibrobacteres;c__Fibrobacteria;o__Fibrobacterales;f__Fibrobacteraceae":0.0,"k__Bacteria;p__Fibrobacteres;c__TG3;o__TG3-1;f__TSCOR003-O20":0.0,"k__Bacteria;p__Firmicutes;c__Bacilli;__;__":0.0,"k__Bacteria;p__Firmicutes;c__Bacilli;o__Bacillales;__":0.0,"k__Bacteria;p__Firmicutes;c__Bacilli;o__Bacillales;f__Bacillaceae":0.0,"k__Bacteria;p__Firmicutes;c__Bacilli;o__Bacillales;f__Paenibacillaceae":0.0,"k__Bacteria;p__Firmicutes;c__Bacilli;o__Bacillales;f__Planococcaceae":13.0,"k__Bacteria;p__Firmicutes;c__Bacilli;o__Bacillales;f__Staphylococcaceae":0.0,"k__Bacteria;p__Firmicutes;c__Bacilli;o__Bacillales;f__Thermoactinomycetaceae":0.0,"k__Bacteria;p__Firmicutes;c__Bacilli;o__Haloplasmatales;f__Haloplasmataceae":0.0,"k__Bacteria;p__Firmicutes;c__Bacilli;o__Lactobacillales;f__Aerococcaceae":0.0,"k__Bacteria;p__Firmicutes;c__Bacilli;o__Lactobacillales;f__Carnobacteriaceae":0.0,"k__Bacteria;p__Firmicutes;c__Bacilli;o__Lactobacillales;f__Enterococcaceae":0.0,"k__Bacteria;p__Firmicutes;c__Bacilli;o__Lactobacillales;f__Lactobacillaceae":0.0,"k__Bacteria;p__Firmicutes;c__Bacilli;o__Lactobacillales;f__Leuconostocaceae":0.0,"k__Bacteria;p__Firmicutes;c__Bacilli;o__Lactobacillales;f__Streptococcaceae":21.0,"k__Bacteria;p__Firmicutes;c__Bacilli;o__Turicibacterales;f__Turicibacteraceae":0.0,"k__Bacteria;p__Firmicutes;c__Clostridia;__;__":439.0,"k__Bacteria;p__Firmicutes;c__Clostridia;o__;f__":6.0,"k__Bacteria;p__Firmicutes;c__Clostridia;o__BSA2B-08;f__":21.0,"k__Bacteria;p__Firmicutes;c__Clostridia;o__Clostridiales;__":38.0,"k__Bacteria;p__Firmicutes;c__Clostridia;o__Clostridiales;f__":38.0,"k__Bacteria;p__Firmicutes;c__Clostridia;o__Clostridiales;f__Caldicoprobacteraceae":186.0,"k__Bacteria;p__Firmicutes;c__Clostridia;o__Clostridiales;f__Christensenellaceae":0.0,"k__Bacteria;p__Firmicutes;c__Clostridia;o__Clostridiales;f__Clostridiaceae":89.0,"k__Bacteria;p__Firmicutes;c__Clostridia;o__Clostridiales;f__Dehalobacteriaceae":0.0,"k__Bacteria;p__Firmicutes;c__Clostridia;o__Clostridiales;f__EtOH8":16.0,"k__Bacteria;p__Firmicutes;c__Clostridia;o__Clostridiales;f__Eubacteriaceae":10.0,"k__Bacteria;p__Firmicutes;c__Clostridia;o__Clostridiales;f__Gracilibacteraceae":10.0,"k__Bacteria;p__Firmicutes;c__Clostridia;o__Clostridiales;f__Lachnospiraceae":13.0,"k__Bacteria;p__Firmicutes;c__Clostridia;o__Clostridiales;f__Peptococcaceae":8.0,"k__Bacteria;p__Firmicutes;c__Clostridia;o__Clostridiales;f__Peptostreptococcaceae":0.0,"k__Bacteria;p__Firmicutes;c__Clostridia;o__Clostridiales;f__Ruminococcaceae":274.0,"k__Bacteria;p__Firmicutes;c__Clostridia;o__Clostridiales;f__Syntrophomonadaceae":15.0,"k__Bacteria;p__Firmicutes;c__Clostridia;o__Clostridiales;f__Veillonellaceae":0.0,"k__Bacteria;p__Firmicutes;c__Clostridia;o__Clostridiales;f__[Mogibacteriaceae]":32.0,"k__Bacteria;p__Firmicutes;c__Clostridia;o__Clostridiales;f__[Tissierellaceae]":131.0,"k__Bacteria;p__Firmicutes;c__Clostridia;o__Halanaerobiales;f__Halanaerobiaceae":36.0,"k__Bacteria;p__Firmicutes;c__Clostridia;o__MBA08;f__":6191.0,"k__Bacteria;p__Firmicutes;c__Clostridia;o__Natranaerobiales;f__":0.0,"k__Bacteria;p__Firmicutes;c__Clostridia;o__Natranaerobiales;f__Anaerobrancaceae":43.0,"k__Bacteria;p__Firmicutes;c__Clostridia;o__Natranaerobiales;f__ML1228J-1":0.0,"k__Bacteria;p__Firmicutes;c__Clostridia;o__Natranaerobiales;f__YAB3B13":9.0,"k__Bacteria;p__Firmicutes;c__Clostridia;o__OPB54;f__":17.0,"k__Bacteria;p__Firmicutes;c__Clostridia;o__SHA-98;f__":1152.0,"k__Bacteria;p__Firmicutes;c__Clostridia;o__SHA-98;f__D2":60.0,"k__Bacteria;p__Firmicutes;c__Clostridia;o__Thermoanaerobacterales;f__":86.0,"k__Bacteria;p__Firmicutes;c__Clostridia;o__Thermoanaerobacterales;f__Thermoanaerobacteraceae":108.0,"k__Bacteria;p__Firmicutes;c__Clostridia;o__Thermoanaerobacterales;f__Thermodesulfobiaceae":0.0,"k__Bacteria;p__Firmicutes;c__Erysipelotrichi;o__Erysipelotrichales;f__Erysipelotrichaceae":0.0,"k__Bacteria;p__Firmicutes;c__OPB54;o__;f__":77.0,"k__Bacteria;p__NKB19;c__noFP_H4;o__;f__":0.0,"k__Bacteria;p__OD1;c__;o__;f__":0.0,"k__Bacteria;p__OD1;c__ABY1;o__;f__":0.0,"k__Bacteria;p__OP1;c__OPB14;o__;f__":0.0,"k__Bacteria;p__OP8;c__OP8_1;o__OPB95;f__":0.0,"k__Bacteria;p__OP9;c__JS1;o__BA021;f__":0.0,"k__Bacteria;p__OP9;c__OPB46;o__OPB72;f__TIBD11":16.0,"k__Bacteria;p__OP9;c__OPB46;o__SHA-1;f__":0.0,"k__Bacteria;p__Proteobacteria;c__Alphaproteobacteria;__;__":0.0,"k__Bacteria;p__Proteobacteria;c__Alphaproteobacteria;o__Rhizobiales;f__Hyphomicrobiaceae":0.0,"k__Bacteria;p__Proteobacteria;c__Alphaproteobacteria;o__Rhizobiales;f__Methylobacteriaceae":0.0,"k__Bacteria;p__Proteobacteria;c__Alphaproteobacteria;o__Rhizobiales;f__Methylocystaceae":0.0,"k__Bacteria;p__Proteobacteria;c__Alphaproteobacteria;o__Rhodobacterales;f__Rhodobacteraceae":0.0,"k__Bacteria;p__Proteobacteria;c__Alphaproteobacteria;o__Rhodospirillales;f__Rhodospirillaceae":0.0,"k__Bacteria;p__Proteobacteria;c__Alphaproteobacteria;o__Sphingomonadales;__":0.0,"k__Bacteria;p__Proteobacteria;c__Betaproteobacteria;__;__":0.0,"k__Bacteria;p__Proteobacteria;c__Betaproteobacteria;o__Burkholderiales;f__Alcaligenaceae":0.0,"k__Bacteria;p__Proteobacteria;c__Betaproteobacteria;o__Burkholderiales;f__Burkholderiaceae":0.0,"k__Bacteria;p__Proteobacteria;c__Betaproteobacteria;o__Burkholderiales;f__Comamonadaceae":0.0,"k__Bacteria;p__Proteobacteria;c__Betaproteobacteria;o__Thiobacterales;f__Thiobacteraceae":0.0,"k__Bacteria;p__Proteobacteria;c__Deltaproteobacteria;__;__":0.0,"k__Bacteria;p__Proteobacteria;c__Deltaproteobacteria;o__;f__":0.0,"k__Bacteria;p__Proteobacteria;c__Deltaproteobacteria;o__Syntrophobacterales;f__Syntrophaceae":0.0,"k__Bacteria;p__Proteobacteria;c__Deltaproteobacteria;o__Syntrophobacterales;f__Syntrophorhabdaceae":0.0,"k__Bacteria;p__Proteobacteria;c__Epsilonproteobacteria;o__Campylobacterales;f__Campylobacteraceae":0.0,"k__Bacteria;p__Proteobacteria;c__Gammaproteobacteria;__;__":0.0,"k__Bacteria;p__Proteobacteria;c__Gammaproteobacteria;o__Aeromonadales;f__Aeromonadaceae":0.0,"k__Bacteria;p__Proteobacteria;c__Gammaproteobacteria;o__Aeromonadales;f__Succinivibrionaceae":0.0,"k__Bacteria;p__Proteobacteria;c__Gammaproteobacteria;o__Pseudomonadales;f__Moraxellaceae":0.0,"k__Bacteria;p__Proteobacteria;c__Gammaproteobacteria;o__Pseudomonadales;f__Pseudomonadaceae":0.0,"k__Bacteria;p__Proteobacteria;c__Gammaproteobacteria;o__Xanthomonadales;f__Xanthomonadaceae":0.0,"k__Bacteria;p__SAR406;c__AB16;o__noFP_H7;f__":0.0,"k__Bacteria;p__SR1;c__;o__;f__":0.0,"k__Bacteria;p__Spirochaetes;c__MVP-15;o__PL-11B10;f__":0.0,"k__Bacteria;p__Spirochaetes;c__Spirochaetes;o__Sphaerochaetales;f__Sphaerochaetaceae":0.0,"k__Bacteria;p__Spirochaetes;c__Spirochaetes;o__Spirochaetales;f__Spirochaetaceae":0.0,"k__Bacteria;p__Spirochaetes;c__[Leptospirae];o__[Leptospirales];f__Sediment-4":0.0,"k__Bacteria;p__Synergistetes;c__Synergistia;o__Synergistales;f__":0.0,"k__Bacteria;p__Synergistetes;c__Synergistia;o__Synergistales;f__Anaerobaculaceae":94.0,"k__Bacteria;p__Synergistetes;c__Synergistia;o__Synergistales;f__Dethiosulfovibrionaceae":0.0,"k__Bacteria;p__Synergistetes;c__Synergistia;o__Synergistales;f__Synergistaceae":0.0,"k__Bacteria;p__Synergistetes;c__Synergistia;o__Synergistales;f__Thermovirgaceae":0.0,"k__Bacteria;p__TA06;c__;o__;f__":0.0,"k__Bacteria;p__TM7;c__TM7-1;o__;f__":0.0,"k__Bacteria;p__TM7;c__TM7-3;__;__":0.0,"k__Bacteria;p__TM7;c__TM7-3;o__;f__":0.0,"k__Bacteria;p__TM7;c__TM7-3;o__CW040;f__F16":0.0,"k__Bacteria;p__TM7;c__TM7-3;o__I025;f__":0.0,"k__Bacteria;p__Tenericutes;c__Mollicutes;o__;f__":0.0,"k__Bacteria;p__Tenericutes;c__Mollicutes;o__Acholeplasmatales;f__Acholeplasmataceae":0.0,"k__Bacteria;p__Tenericutes;c__Mollicutes;o__RF39;f__":0.0,"k__Bacteria;p__Tenericutes;c__RF3;o__ML615J-28;f__":70.0,"k__Bacteria;p__Thermotogae;c__Thermotogae;o__Thermotogales;f__Thermotogaceae":320.0,"k__Bacteria;p__Verrucomicrobia;c__Verruco-5;o__LD1-PB3;f__":0.0,"k__Bacteria;p__Verrucomicrobia;c__[Pedosphaerae];o__[Pedosphaerales];f__R4-41B":0.0,"k__Bacteria;p__WPS-2;c__;o__;f__":0.0,"k__Bacteria;p__WS6;c__SC72;o__A-2AF;f__":0.0,"k__Bacteria;p__WS6;c__SC72;o__WCHB1-15;f__":0.0,"k__Bacteria;p__WWE1;c__[Cloacamonae];o__[Cloacamonales];f__":0.0,"k__Bacteria;p__WWE1;c__[Cloacamonae];o__[Cloacamonales];f__CW-1":0.0,"k__Bacteria;p__WWE1;c__[Cloacamonae];o__[Cloacamonales];f__[Cloacamonaceae]":0.0,"plant type":"Biogas","plant no.":"#07"},{"index":"08_U341F-U806R-NW3-9","k__Archaea;p__Crenarchaeota;c__MCG;o__pGrfC26;f__":0.0,"k__Archaea;p__Euryarchaeota;c__Methanobacteria;o__Methanobacteriales;f__Methanobacteriaceae":0.0,"k__Archaea;p__Euryarchaeota;c__Methanobacteria;o__Methanobacteriales;f__WSA2":0.0,"k__Archaea;p__Euryarchaeota;c__Methanomicrobia;o__Methanomicrobiales;f__Methanomicrobiaceae":0.0,"k__Archaea;p__Euryarchaeota;c__Methanomicrobia;o__Methanomicrobiales;f__Methanoregulaceae":0.0,"k__Archaea;p__Euryarchaeota;c__Methanomicrobia;o__Methanomicrobiales;f__Methanospirillaceae":0.0,"k__Archaea;p__Euryarchaeota;c__Methanomicrobia;o__Methanosarcinales;f__Methanosaetaceae":0.0,"k__Archaea;p__Euryarchaeota;c__Methanomicrobia;o__Methanosarcinales;f__Methanosarcinaceae":0.0,"k__Archaea;p__Euryarchaeota;c__Thermoplasmata;o__E2;f__[Methanomassiliicoccaceae]":0.0,"k__Archaea;p__[Parvarchaeota];c__[Parvarchaea];o__WCHD3-30;f__":0.0,"k__Bacteria;__;__;__;__":0.0,"k__Bacteria;p__;c__;o__;f__":76.0,"k__Bacteria;p__Acidobacteria;c__BPC102;o__MVS-40;f__":0.0,"k__Bacteria;p__Acidobacteria;c__Solibacteres;o__Solibacterales;f__AKIW659":0.0,"k__Bacteria;p__Acidobacteria;c__[Chloracidobacteria];o__RB41;f__Ellin6075":0.0,"k__Bacteria;p__Actinobacteria;c__;o__;f__":0.0,"k__Bacteria;p__Actinobacteria;c__Acidimicrobiia;o__Acidimicrobiales;f__":0.0,"k__Bacteria;p__Actinobacteria;c__Acidimicrobiia;o__Acidimicrobiales;f__C111":0.0,"k__Bacteria;p__Actinobacteria;c__Acidimicrobiia;o__Acidimicrobiales;f__Microthrixaceae":0.0,"k__Bacteria;p__Actinobacteria;c__Actinobacteria;o__Actinomycetales;__":0.0,"k__Bacteria;p__Actinobacteria;c__Actinobacteria;o__Actinomycetales;f__Corynebacteriaceae":0.0,"k__Bacteria;p__Actinobacteria;c__Actinobacteria;o__Actinomycetales;f__Dermatophilaceae":0.0,"k__Bacteria;p__Actinobacteria;c__Actinobacteria;o__Actinomycetales;f__Intrasporangiaceae":0.0,"k__Bacteria;p__Actinobacteria;c__Actinobacteria;o__Actinomycetales;f__Microbacteriaceae":0.0,"k__Bacteria;p__Actinobacteria;c__Actinobacteria;o__Actinomycetales;f__Nocardioidaceae":0.0,"k__Bacteria;p__Actinobacteria;c__Actinobacteria;o__Actinomycetales;f__Nocardiopsaceae":0.0,"k__Bacteria;p__Actinobacteria;c__Actinobacteria;o__Actinomycetales;f__Pseudonocardiaceae":0.0,"k__Bacteria;p__Actinobacteria;c__Actinobacteria;o__Actinomycetales;f__Streptomycetaceae":0.0,"k__Bacteria;p__Actinobacteria;c__Actinobacteria;o__Bifidobacteriales;f__Bifidobacteriaceae":0.0,"k__Bacteria;p__Actinobacteria;c__Actinobacteria;o__WCHB1-81;f__At425_EubF1":0.0,"k__Bacteria;p__Actinobacteria;c__Coriobacteriia;o__Coriobacteriales;f__Coriobacteriaceae":0.0,"k__Bacteria;p__Armatimonadetes;c__SJA-176;o__GAB-B06;f__":0.0,"k__Bacteria;p__Bacteroidetes;__;__;__":298.0,"k__Bacteria;p__Bacteroidetes;c__Bacteroidia;o__Bacteroidales;__":49.0,"k__Bacteria;p__Bacteroidetes;c__Bacteroidia;o__Bacteroidales;f__":34.0,"k__Bacteria;p__Bacteroidetes;c__Bacteroidia;o__Bacteroidales;f__Bacteroidaceae":0.0,"k__Bacteria;p__Bacteroidetes;c__Bacteroidia;o__Bacteroidales;f__Marinilabiaceae":13.0,"k__Bacteria;p__Bacteroidetes;c__Bacteroidia;o__Bacteroidales;f__Porphyromonadaceae":9.0,"k__Bacteria;p__Bacteroidetes;c__Bacteroidia;o__Bacteroidales;f__Prevotellaceae":0.0,"k__Bacteria;p__Bacteroidetes;c__Bacteroidia;o__Bacteroidales;f__Rikenellaceae":0.0,"k__Bacteria;p__Bacteroidetes;c__Flavobacteriia;o__Flavobacteriales;f__Flavobacteriaceae":0.0,"k__Bacteria;p__Bacteroidetes;c__Sphingobacteriia;o__Sphingobacteriales;f__Sphingobacteriaceae":0.0,"k__Bacteria;p__Bacteroidetes;c__[Saprospirae];o__[Saprospirales];f__Chitinophagaceae":0.0,"k__Bacteria;p__Bacteroidetes;c__[Saprospirae];o__[Saprospirales];f__Saprospiraceae":0.0,"k__Bacteria;p__Caldiserica;c__OP5;o__WCHB1-02;f__SHBZ1169":0.0,"k__Bacteria;p__Caldiserica;c__TTA-B1;o__;f__":0.0,"k__Bacteria;p__Chlorobi;c__Ignavibacteria;o__Ignavibacteriales;f__Ignavibacteriaceae":0.0,"k__Bacteria;p__Chlorobi;c__SJA-28;o__;f__":0.0,"k__Bacteria;p__Chloroflexi;c__;o__;f__":0.0,"k__Bacteria;p__Chloroflexi;c__Anaerolineae;o__Anaerolineales;f__Anaerolinaceae":0.0,"k__Bacteria;p__Chloroflexi;c__Anaerolineae;o__Caldilineales;f__Caldilineaceae":0.0,"k__Bacteria;p__Chloroflexi;c__Anaerolineae;o__OPB11;f__":0.0,"k__Bacteria;p__Chloroflexi;c__Anaerolineae;o__SBR1031;f__SHA-31":0.0,"k__Bacteria;p__Chloroflexi;c__Anaerolineae;o__SHA-20;f__":0.0,"k__Bacteria;p__Chloroflexi;c__Dehalococcoidetes;o__Dehalococcoidales;__":0.0,"k__Bacteria;p__Chloroflexi;c__Ellin6529;o__;f__":0.0,"k__Bacteria;p__Chloroflexi;c__TK17;o__mle1-48;f__":0.0,"k__Bacteria;p__Chloroflexi;c__Thermomicrobia;o__JG30-KF-CM45;f__":0.0,"k__Bacteria;p__Cyanobacteria;c__Chloroplast;o__Streptophyta;f__":0.0,"k__Bacteria;p__EM3;c__;o__;f__":0.0,"k__Bacteria;p__Fibrobacteres;c__Fibrobacteria;o__Fibrobacterales;f__":0.0,"k__Bacteria;p__Fibrobacteres;c__Fibrobacteria;o__Fibrobacterales;f__Fibrobacteraceae":0.0,"k__Bacteria;p__Fibrobacteres;c__TG3;o__TG3-1;f__TSCOR003-O20":0.0,"k__Bacteria;p__Firmicutes;c__Bacilli;__;__":0.0,"k__Bacteria;p__Firmicutes;c__Bacilli;o__Bacillales;__":0.0,"k__Bacteria;p__Firmicutes;c__Bacilli;o__Bacillales;f__Bacillaceae":0.0,"k__Bacteria;p__Firmicutes;c__Bacilli;o__Bacillales;f__Paenibacillaceae":0.0,"k__Bacteria;p__Firmicutes;c__Bacilli;o__Bacillales;f__Planococcaceae":0.0,"k__Bacteria;p__Firmicutes;c__Bacilli;o__Bacillales;f__Staphylococcaceae":0.0,"k__Bacteria;p__Firmicutes;c__Bacilli;o__Bacillales;f__Thermoactinomycetaceae":0.0,"k__Bacteria;p__Firmicutes;c__Bacilli;o__Haloplasmatales;f__Haloplasmataceae":0.0,"k__Bacteria;p__Firmicutes;c__Bacilli;o__Lactobacillales;f__Aerococcaceae":0.0,"k__Bacteria;p__Firmicutes;c__Bacilli;o__Lactobacillales;f__Carnobacteriaceae":0.0,"k__Bacteria;p__Firmicutes;c__Bacilli;o__Lactobacillales;f__Enterococcaceae":0.0,"k__Bacteria;p__Firmicutes;c__Bacilli;o__Lactobacillales;f__Lactobacillaceae":0.0,"k__Bacteria;p__Firmicutes;c__Bacilli;o__Lactobacillales;f__Leuconostocaceae":0.0,"k__Bacteria;p__Firmicutes;c__Bacilli;o__Lactobacillales;f__Streptococcaceae":0.0,"k__Bacteria;p__Firmicutes;c__Bacilli;o__Turicibacterales;f__Turicibacteraceae":0.0,"k__Bacteria;p__Firmicutes;c__Clostridia;__;__":147.0,"k__Bacteria;p__Firmicutes;c__Clostridia;o__;f__":13.0,"k__Bacteria;p__Firmicutes;c__Clostridia;o__BSA2B-08;f__":0.0,"k__Bacteria;p__Firmicutes;c__Clostridia;o__Clostridiales;__":0.0,"k__Bacteria;p__Firmicutes;c__Clostridia;o__Clostridiales;f__":0.0,"k__Bacteria;p__Firmicutes;c__Clostridia;o__Clostridiales;f__Caldicoprobacteraceae":58.0,"k__Bacteria;p__Firmicutes;c__Clostridia;o__Clostridiales;f__Christensenellaceae":0.0,"k__Bacteria;p__Firmicutes;c__Clostridia;o__Clostridiales;f__Clostridiaceae":157.0,"k__Bacteria;p__Firmicutes;c__Clostridia;o__Clostridiales;f__Dehalobacteriaceae":0.0,"k__Bacteria;p__Firmicutes;c__Clostridia;o__Clostridiales;f__EtOH8":0.0,"k__Bacteria;p__Firmicutes;c__Clostridia;o__Clostridiales;f__Eubacteriaceae":3.0,"k__Bacteria;p__Firmicutes;c__Clostridia;o__Clostridiales;f__Gracilibacteraceae":0.0,"k__Bacteria;p__Firmicutes;c__Clostridia;o__Clostridiales;f__Lachnospiraceae":12.0,"k__Bacteria;p__Firmicutes;c__Clostridia;o__Clostridiales;f__Peptococcaceae":30.0,"k__Bacteria;p__Firmicutes;c__Clostridia;o__Clostridiales;f__Peptostreptococcaceae":0.0,"k__Bacteria;p__Firmicutes;c__Clostridia;o__Clostridiales;f__Ruminococcaceae":112.0,"k__Bacteria;p__Firmicutes;c__Clostridia;o__Clostridiales;f__Syntrophomonadaceae":13.0,"k__Bacteria;p__Firmicutes;c__Clostridia;o__Clostridiales;f__Veillonellaceae":0.0,"k__Bacteria;p__Firmicutes;c__Clostridia;o__Clostridiales;f__[Mogibacteriaceae]":25.0,"k__Bacteria;p__Firmicutes;c__Clostridia;o__Clostridiales;f__[Tissierellaceae]":49.0,"k__Bacteria;p__Firmicutes;c__Clostridia;o__Halanaerobiales;f__Halanaerobiaceae":65.0,"k__Bacteria;p__Firmicutes;c__Clostridia;o__MBA08;f__":1364.0,"k__Bacteria;p__Firmicutes;c__Clostridia;o__Natranaerobiales;f__":0.0,"k__Bacteria;p__Firmicutes;c__Clostridia;o__Natranaerobiales;f__Anaerobrancaceae":21.0,"k__Bacteria;p__Firmicutes;c__Clostridia;o__Natranaerobiales;f__ML1228J-1":0.0,"k__Bacteria;p__Firmicutes;c__Clostridia;o__Natranaerobiales;f__YAB3B13":0.0,"k__Bacteria;p__Firmicutes;c__Clostridia;o__OPB54;f__":42.0,"k__Bacteria;p__Firmicutes;c__Clostridia;o__SHA-98;f__":306.0,"k__Bacteria;p__Firmicutes;c__Clostridia;o__SHA-98;f__D2":26.0,"k__Bacteria;p__Firmicutes;c__Clostridia;o__Thermoanaerobacterales;f__":26.0,"k__Bacteria;p__Firmicutes;c__Clostridia;o__Thermoanaerobacterales;f__Thermoanaerobacteraceae":52.0,"k__Bacteria;p__Firmicutes;c__Clostridia;o__Thermoanaerobacterales;f__Thermodesulfobiaceae":0.0,"k__Bacteria;p__Firmicutes;c__Erysipelotrichi;o__Erysipelotrichales;f__Erysipelotrichaceae":0.0,"k__Bacteria;p__Firmicutes;c__OPB54;o__;f__":21.0,"k__Bacteria;p__NKB19;c__noFP_H4;o__;f__":0.0,"k__Bacteria;p__OD1;c__;o__;f__":0.0,"k__Bacteria;p__OD1;c__ABY1;o__;f__":0.0,"k__Bacteria;p__OP1;c__OPB14;o__;f__":0.0,"k__Bacteria;p__OP8;c__OP8_1;o__OPB95;f__":0.0,"k__Bacteria;p__OP9;c__JS1;o__BA021;f__":0.0,"k__Bacteria;p__OP9;c__OPB46;o__OPB72;f__TIBD11":0.0,"k__Bacteria;p__OP9;c__OPB46;o__SHA-1;f__":0.0,"k__Bacteria;p__Proteobacteria;c__Alphaproteobacteria;__;__":0.0,"k__Bacteria;p__Proteobacteria;c__Alphaproteobacteria;o__Rhizobiales;f__Hyphomicrobiaceae":0.0,"k__Bacteria;p__Proteobacteria;c__Alphaproteobacteria;o__Rhizobiales;f__Methylobacteriaceae":0.0,"k__Bacteria;p__Proteobacteria;c__Alphaproteobacteria;o__Rhizobiales;f__Methylocystaceae":0.0,"k__Bacteria;p__Proteobacteria;c__Alphaproteobacteria;o__Rhodobacterales;f__Rhodobacteraceae":0.0,"k__Bacteria;p__Proteobacteria;c__Alphaproteobacteria;o__Rhodospirillales;f__Rhodospirillaceae":0.0,"k__Bacteria;p__Proteobacteria;c__Alphaproteobacteria;o__Sphingomonadales;__":0.0,"k__Bacteria;p__Proteobacteria;c__Betaproteobacteria;__;__":0.0,"k__Bacteria;p__Proteobacteria;c__Betaproteobacteria;o__Burkholderiales;f__Alcaligenaceae":0.0,"k__Bacteria;p__Proteobacteria;c__Betaproteobacteria;o__Burkholderiales;f__Burkholderiaceae":0.0,"k__Bacteria;p__Proteobacteria;c__Betaproteobacteria;o__Burkholderiales;f__Comamonadaceae":0.0,"k__Bacteria;p__Proteobacteria;c__Betaproteobacteria;o__Thiobacterales;f__Thiobacteraceae":0.0,"k__Bacteria;p__Proteobacteria;c__Deltaproteobacteria;__;__":0.0,"k__Bacteria;p__Proteobacteria;c__Deltaproteobacteria;o__;f__":0.0,"k__Bacteria;p__Proteobacteria;c__Deltaproteobacteria;o__Syntrophobacterales;f__Syntrophaceae":0.0,"k__Bacteria;p__Proteobacteria;c__Deltaproteobacteria;o__Syntrophobacterales;f__Syntrophorhabdaceae":0.0,"k__Bacteria;p__Proteobacteria;c__Epsilonproteobacteria;o__Campylobacterales;f__Campylobacteraceae":0.0,"k__Bacteria;p__Proteobacteria;c__Gammaproteobacteria;__;__":0.0,"k__Bacteria;p__Proteobacteria;c__Gammaproteobacteria;o__Aeromonadales;f__Aeromonadaceae":0.0,"k__Bacteria;p__Proteobacteria;c__Gammaproteobacteria;o__Aeromonadales;f__Succinivibrionaceae":0.0,"k__Bacteria;p__Proteobacteria;c__Gammaproteobacteria;o__Pseudomonadales;f__Moraxellaceae":0.0,"k__Bacteria;p__Proteobacteria;c__Gammaproteobacteria;o__Pseudomonadales;f__Pseudomonadaceae":0.0,"k__Bacteria;p__Proteobacteria;c__Gammaproteobacteria;o__Xanthomonadales;f__Xanthomonadaceae":0.0,"k__Bacteria;p__SAR406;c__AB16;o__noFP_H7;f__":0.0,"k__Bacteria;p__SR1;c__;o__;f__":0.0,"k__Bacteria;p__Spirochaetes;c__MVP-15;o__PL-11B10;f__":0.0,"k__Bacteria;p__Spirochaetes;c__Spirochaetes;o__Sphaerochaetales;f__Sphaerochaetaceae":0.0,"k__Bacteria;p__Spirochaetes;c__Spirochaetes;o__Spirochaetales;f__Spirochaetaceae":0.0,"k__Bacteria;p__Spirochaetes;c__[Leptospirae];o__[Leptospirales];f__Sediment-4":0.0,"k__Bacteria;p__Synergistetes;c__Synergistia;o__Synergistales;f__":0.0,"k__Bacteria;p__Synergistetes;c__Synergistia;o__Synergistales;f__Anaerobaculaceae":47.0,"k__Bacteria;p__Synergistetes;c__Synergistia;o__Synergistales;f__Dethiosulfovibrionaceae":0.0,"k__Bacteria;p__Synergistetes;c__Synergistia;o__Synergistales;f__Synergistaceae":0.0,"k__Bacteria;p__Synergistetes;c__Synergistia;o__Synergistales;f__Thermovirgaceae":0.0,"k__Bacteria;p__TA06;c__;o__;f__":0.0,"k__Bacteria;p__TM7;c__TM7-1;o__;f__":0.0,"k__Bacteria;p__TM7;c__TM7-3;__;__":0.0,"k__Bacteria;p__TM7;c__TM7-3;o__;f__":0.0,"k__Bacteria;p__TM7;c__TM7-3;o__CW040;f__F16":0.0,"k__Bacteria;p__TM7;c__TM7-3;o__I025;f__":0.0,"k__Bacteria;p__Tenericutes;c__Mollicutes;o__;f__":0.0,"k__Bacteria;p__Tenericutes;c__Mollicutes;o__Acholeplasmatales;f__Acholeplasmataceae":0.0,"k__Bacteria;p__Tenericutes;c__Mollicutes;o__RF39;f__":0.0,"k__Bacteria;p__Tenericutes;c__RF3;o__ML615J-28;f__":66.0,"k__Bacteria;p__Thermotogae;c__Thermotogae;o__Thermotogales;f__Thermotogaceae":31.0,"k__Bacteria;p__Verrucomicrobia;c__Verruco-5;o__LD1-PB3;f__":0.0,"k__Bacteria;p__Verrucomicrobia;c__[Pedosphaerae];o__[Pedosphaerales];f__R4-41B":0.0,"k__Bacteria;p__WPS-2;c__;o__;f__":0.0,"k__Bacteria;p__WS6;c__SC72;o__A-2AF;f__":0.0,"k__Bacteria;p__WS6;c__SC72;o__WCHB1-15;f__":0.0,"k__Bacteria;p__WWE1;c__[Cloacamonae];o__[Cloacamonales];f__":0.0,"k__Bacteria;p__WWE1;c__[Cloacamonae];o__[Cloacamonales];f__CW-1":0.0,"k__Bacteria;p__WWE1;c__[Cloacamonae];o__[Cloacamonales];f__[Cloacamonaceae]":0.0,"plant type":"Biogas","plant no.":"#08"},{"index":"09_U341F-U806R-NW3-10","k__Archaea;p__Crenarchaeota;c__MCG;o__pGrfC26;f__":8.0,"k__Archaea;p__Euryarchaeota;c__Methanobacteria;o__Methanobacteriales;f__Methanobacteriaceae":51.0,"k__Archaea;p__Euryarchaeota;c__Methanobacteria;o__Methanobacteriales;f__WSA2":0.0,"k__Archaea;p__Euryarchaeota;c__Methanomicrobia;o__Methanomicrobiales;f__Methanomicrobiaceae":0.0,"k__Archaea;p__Euryarchaeota;c__Methanomicrobia;o__Methanomicrobiales;f__Methanoregulaceae":0.0,"k__Archaea;p__Euryarchaeota;c__Methanomicrobia;o__Methanomicrobiales;f__Methanospirillaceae":0.0,"k__Archaea;p__Euryarchaeota;c__Methanomicrobia;o__Methanosarcinales;f__Methanosaetaceae":229.0,"k__Archaea;p__Euryarchaeota;c__Methanomicrobia;o__Methanosarcinales;f__Methanosarcinaceae":489.0,"k__Archaea;p__Euryarchaeota;c__Thermoplasmata;o__E2;f__[Methanomassiliicoccaceae]":0.0,"k__Archaea;p__[Parvarchaeota];c__[Parvarchaea];o__WCHD3-30;f__":0.0,"k__Bacteria;__;__;__;__":68.0,"k__Bacteria;p__;c__;o__;f__":208.0,"k__Bacteria;p__Acidobacteria;c__BPC102;o__MVS-40;f__":54.0,"k__Bacteria;p__Acidobacteria;c__Solibacteres;o__Solibacterales;f__AKIW659":0.0,"k__Bacteria;p__Acidobacteria;c__[Chloracidobacteria];o__RB41;f__Ellin6075":0.0,"k__Bacteria;p__Actinobacteria;c__;o__;f__":0.0,"k__Bacteria;p__Actinobacteria;c__Acidimicrobiia;o__Acidimicrobiales;f__":0.0,"k__Bacteria;p__Actinobacteria;c__Acidimicrobiia;o__Acidimicrobiales;f__C111":0.0,"k__Bacteria;p__Actinobacteria;c__Acidimicrobiia;o__Acidimicrobiales;f__Microthrixaceae":0.0,"k__Bacteria;p__Actinobacteria;c__Actinobacteria;o__Actinomycetales;__":0.0,"k__Bacteria;p__Actinobacteria;c__Actinobacteria;o__Actinomycetales;f__Corynebacteriaceae":30.0,"k__Bacteria;p__Actinobacteria;c__Actinobacteria;o__Actinomycetales;f__Dermatophilaceae":0.0,"k__Bacteria;p__Actinobacteria;c__Actinobacteria;o__Actinomycetales;f__Intrasporangiaceae":0.0,"k__Bacteria;p__Actinobacteria;c__Actinobacteria;o__Actinomycetales;f__Microbacteriaceae":0.0,"k__Bacteria;p__Actinobacteria;c__Actinobacteria;o__Actinomycetales;f__Nocardioidaceae":0.0,"k__Bacteria;p__Actinobacteria;c__Actinobacteria;o__Actinomycetales;f__Nocardiopsaceae":0.0,"k__Bacteria;p__Actinobacteria;c__Actinobacteria;o__Actinomycetales;f__Pseudonocardiaceae":0.0,"k__Bacteria;p__Actinobacteria;c__Actinobacteria;o__Actinomycetales;f__Streptomycetaceae":0.0,"k__Bacteria;p__Actinobacteria;c__Actinobacteria;o__Bifidobacteriales;f__Bifidobacteriaceae":0.0,"k__Bacteria;p__Actinobacteria;c__Actinobacteria;o__WCHB1-81;f__At425_EubF1":0.0,"k__Bacteria;p__Actinobacteria;c__Coriobacteriia;o__Coriobacteriales;f__Coriobacteriaceae":48.0,"k__Bacteria;p__Armatimonadetes;c__SJA-176;o__GAB-B06;f__":0.0,"k__Bacteria;p__Bacteroidetes;__;__;__":0.0,"k__Bacteria;p__Bacteroidetes;c__Bacteroidia;o__Bacteroidales;__":4.0,"k__Bacteria;p__Bacteroidetes;c__Bacteroidia;o__Bacteroidales;f__":2205.0,"k__Bacteria;p__Bacteroidetes;c__Bacteroidia;o__Bacteroidales;f__Bacteroidaceae":1047.0,"k__Bacteria;p__Bacteroidetes;c__Bacteroidia;o__Bacteroidales;f__Marinilabiaceae":650.0,"k__Bacteria;p__Bacteroidetes;c__Bacteroidia;o__Bacteroidales;f__Porphyromonadaceae":209.0,"k__Bacteria;p__Bacteroidetes;c__Bacteroidia;o__Bacteroidales;f__Prevotellaceae":0.0,"k__Bacteria;p__Bacteroidetes;c__Bacteroidia;o__Bacteroidales;f__Rikenellaceae":0.0,"k__Bacteria;p__Bacteroidetes;c__Flavobacteriia;o__Flavobacteriales;f__Flavobacteriaceae":0.0,"k__Bacteria;p__Bacteroidetes;c__Sphingobacteriia;o__Sphingobacteriales;f__Sphingobacteriaceae":0.0,"k__Bacteria;p__Bacteroidetes;c__[Saprospirae];o__[Saprospirales];f__Chitinophagaceae":0.0,"k__Bacteria;p__Bacteroidetes;c__[Saprospirae];o__[Saprospirales];f__Saprospiraceae":0.0,"k__Bacteria;p__Caldiserica;c__OP5;o__WCHB1-02;f__SHBZ1169":0.0,"k__Bacteria;p__Caldiserica;c__TTA-B1;o__;f__":0.0,"k__Bacteria;p__Chlorobi;c__Ignavibacteria;o__Ignavibacteriales;f__Ignavibacteriaceae":0.0,"k__Bacteria;p__Chlorobi;c__SJA-28;o__;f__":0.0,"k__Bacteria;p__Chloroflexi;c__;o__;f__":0.0,"k__Bacteria;p__Chloroflexi;c__Anaerolineae;o__Anaerolineales;f__Anaerolinaceae":0.0,"k__Bacteria;p__Chloroflexi;c__Anaerolineae;o__Caldilineales;f__Caldilineaceae":0.0,"k__Bacteria;p__Chloroflexi;c__Anaerolineae;o__OPB11;f__":0.0,"k__Bacteria;p__Chloroflexi;c__Anaerolineae;o__SBR1031;f__SHA-31":0.0,"k__Bacteria;p__Chloroflexi;c__Anaerolineae;o__SHA-20;f__":0.0,"k__Bacteria;p__Chloroflexi;c__Dehalococcoidetes;o__Dehalococcoidales;__":0.0,"k__Bacteria;p__Chloroflexi;c__Ellin6529;o__;f__":0.0,"k__Bacteria;p__Chloroflexi;c__TK17;o__mle1-48;f__":0.0,"k__Bacteria;p__Chloroflexi;c__Thermomicrobia;o__JG30-KF-CM45;f__":0.0,"k__Bacteria;p__Cyanobacteria;c__Chloroplast;o__Streptophyta;f__":2.0,"k__Bacteria;p__EM3;c__;o__;f__":0.0,"k__Bacteria;p__Fibrobacteres;c__Fibrobacteria;o__Fibrobacterales;f__":5.0,"k__Bacteria;p__Fibrobacteres;c__Fibrobacteria;o__Fibrobacterales;f__Fibrobacteraceae":0.0,"k__Bacteria;p__Fibrobacteres;c__TG3;o__TG3-1;f__TSCOR003-O20":77.0,"k__Bacteria;p__Firmicutes;c__Bacilli;__;__":0.0,"k__Bacteria;p__Firmicutes;c__Bacilli;o__Bacillales;__":0.0,"k__Bacteria;p__Firmicutes;c__Bacilli;o__Bacillales;f__Bacillaceae":0.0,"k__Bacteria;p__Firmicutes;c__Bacilli;o__Bacillales;f__Paenibacillaceae":0.0,"k__Bacteria;p__Firmicutes;c__Bacilli;o__Bacillales;f__Planococcaceae":0.0,"k__Bacteria;p__Firmicutes;c__Bacilli;o__Bacillales;f__Staphylococcaceae":0.0,"k__Bacteria;p__Firmicutes;c__Bacilli;o__Bacillales;f__Thermoactinomycetaceae":0.0,"k__Bacteria;p__Firmicutes;c__Bacilli;o__Haloplasmatales;f__Haloplasmataceae":0.0,"k__Bacteria;p__Firmicutes;c__Bacilli;o__Lactobacillales;f__Aerococcaceae":63.0,"k__Bacteria;p__Firmicutes;c__Bacilli;o__Lactobacillales;f__Carnobacteriaceae":11.0,"k__Bacteria;p__Firmicutes;c__Bacilli;o__Lactobacillales;f__Enterococcaceae":0.0,"k__Bacteria;p__Firmicutes;c__Bacilli;o__Lactobacillales;f__Lactobacillaceae":0.0,"k__Bacteria;p__Firmicutes;c__Bacilli;o__Lactobacillales;f__Leuconostocaceae":0.0,"k__Bacteria;p__Firmicutes;c__Bacilli;o__Lactobacillales;f__Streptococcaceae":9.0,"k__Bacteria;p__Firmicutes;c__Bacilli;o__Turicibacterales;f__Turicibacteraceae":34.0,"k__Bacteria;p__Firmicutes;c__Clostridia;__;__":6.0,"k__Bacteria;p__Firmicutes;c__Clostridia;o__;f__":4.0,"k__Bacteria;p__Firmicutes;c__Clostridia;o__BSA2B-08;f__":4.0,"k__Bacteria;p__Firmicutes;c__Clostridia;o__Clostridiales;__":463.0,"k__Bacteria;p__Firmicutes;c__Clostridia;o__Clostridiales;f__":287.0,"k__Bacteria;p__Firmicutes;c__Clostridia;o__Clostridiales;f__Caldicoprobacteraceae":329.0,"k__Bacteria;p__Firmicutes;c__Clostridia;o__Clostridiales;f__Christensenellaceae":13.0,"k__Bacteria;p__Firmicutes;c__Clostridia;o__Clostridiales;f__Clostridiaceae":764.0,"k__Bacteria;p__Firmicutes;c__Clostridia;o__Clostridiales;f__Dehalobacteriaceae":0.0,"k__Bacteria;p__Firmicutes;c__Clostridia;o__Clostridiales;f__EtOH8":0.0,"k__Bacteria;p__Firmicutes;c__Clostridia;o__Clostridiales;f__Eubacteriaceae":15.0,"k__Bacteria;p__Firmicutes;c__Clostridia;o__Clostridiales;f__Gracilibacteraceae":84.0,"k__Bacteria;p__Firmicutes;c__Clostridia;o__Clostridiales;f__Lachnospiraceae":0.0,"k__Bacteria;p__Firmicutes;c__Clostridia;o__Clostridiales;f__Peptococcaceae":37.0,"k__Bacteria;p__Firmicutes;c__Clostridia;o__Clostridiales;f__Peptostreptococcaceae":262.0,"k__Bacteria;p__Firmicutes;c__Clostridia;o__Clostridiales;f__Ruminococcaceae":729.0,"k__Bacteria;p__Firmicutes;c__Clostridia;o__Clostridiales;f__Syntrophomonadaceae":103.0,"k__Bacteria;p__Firmicutes;c__Clostridia;o__Clostridiales;f__Veillonellaceae":0.0,"k__Bacteria;p__Firmicutes;c__Clostridia;o__Clostridiales;f__[Mogibacteriaceae]":83.0,"k__Bacteria;p__Firmicutes;c__Clostridia;o__Clostridiales;f__[Tissierellaceae]":393.0,"k__Bacteria;p__Firmicutes;c__Clostridia;o__Halanaerobiales;f__Halanaerobiaceae":0.0,"k__Bacteria;p__Firmicutes;c__Clostridia;o__MBA08;f__":847.0,"k__Bacteria;p__Firmicutes;c__Clostridia;o__Natranaerobiales;f__":0.0,"k__Bacteria;p__Firmicutes;c__Clostridia;o__Natranaerobiales;f__Anaerobrancaceae":20.0,"k__Bacteria;p__Firmicutes;c__Clostridia;o__Natranaerobiales;f__ML1228J-1":21.0,"k__Bacteria;p__Firmicutes;c__Clostridia;o__Natranaerobiales;f__YAB3B13":0.0,"k__Bacteria;p__Firmicutes;c__Clostridia;o__OPB54;f__":44.0,"k__Bacteria;p__Firmicutes;c__Clostridia;o__SHA-98;f__":19.0,"k__Bacteria;p__Firmicutes;c__Clostridia;o__SHA-98;f__D2":20.0,"k__Bacteria;p__Firmicutes;c__Clostridia;o__Thermoanaerobacterales;f__":11.0,"k__Bacteria;p__Firmicutes;c__Clostridia;o__Thermoanaerobacterales;f__Thermoanaerobacteraceae":0.0,"k__Bacteria;p__Firmicutes;c__Clostridia;o__Thermoanaerobacterales;f__Thermodesulfobiaceae":0.0,"k__Bacteria;p__Firmicutes;c__Erysipelotrichi;o__Erysipelotrichales;f__Erysipelotrichaceae":80.0,"k__Bacteria;p__Firmicutes;c__OPB54;o__;f__":34.0,"k__Bacteria;p__NKB19;c__noFP_H4;o__;f__":5.0,"k__Bacteria;p__OD1;c__;o__;f__":0.0,"k__Bacteria;p__OD1;c__ABY1;o__;f__":0.0,"k__Bacteria;p__OP1;c__OPB14;o__;f__":0.0,"k__Bacteria;p__OP8;c__OP8_1;o__OPB95;f__":0.0,"k__Bacteria;p__OP9;c__JS1;o__BA021;f__":0.0,"k__Bacteria;p__OP9;c__OPB46;o__OPB72;f__TIBD11":0.0,"k__Bacteria;p__OP9;c__OPB46;o__SHA-1;f__":11.0,"k__Bacteria;p__Proteobacteria;c__Alphaproteobacteria;__;__":3.0,"k__Bacteria;p__Proteobacteria;c__Alphaproteobacteria;o__Rhizobiales;f__Hyphomicrobiaceae":0.0,"k__Bacteria;p__Proteobacteria;c__Alphaproteobacteria;o__Rhizobiales;f__Methylobacteriaceae":0.0,"k__Bacteria;p__Proteobacteria;c__Alphaproteobacteria;o__Rhizobiales;f__Methylocystaceae":0.0,"k__Bacteria;p__Proteobacteria;c__Alphaproteobacteria;o__Rhodobacterales;f__Rhodobacteraceae":0.0,"k__Bacteria;p__Proteobacteria;c__Alphaproteobacteria;o__Rhodospirillales;f__Rhodospirillaceae":0.0,"k__Bacteria;p__Proteobacteria;c__Alphaproteobacteria;o__Sphingomonadales;__":0.0,"k__Bacteria;p__Proteobacteria;c__Betaproteobacteria;__;__":0.0,"k__Bacteria;p__Proteobacteria;c__Betaproteobacteria;o__Burkholderiales;f__Alcaligenaceae":0.0,"k__Bacteria;p__Proteobacteria;c__Betaproteobacteria;o__Burkholderiales;f__Burkholderiaceae":0.0,"k__Bacteria;p__Proteobacteria;c__Betaproteobacteria;o__Burkholderiales;f__Comamonadaceae":0.0,"k__Bacteria;p__Proteobacteria;c__Betaproteobacteria;o__Thiobacterales;f__Thiobacteraceae":0.0,"k__Bacteria;p__Proteobacteria;c__Deltaproteobacteria;__;__":9.0,"k__Bacteria;p__Proteobacteria;c__Deltaproteobacteria;o__;f__":0.0,"k__Bacteria;p__Proteobacteria;c__Deltaproteobacteria;o__Syntrophobacterales;f__Syntrophaceae":0.0,"k__Bacteria;p__Proteobacteria;c__Deltaproteobacteria;o__Syntrophobacterales;f__Syntrophorhabdaceae":0.0,"k__Bacteria;p__Proteobacteria;c__Epsilonproteobacteria;o__Campylobacterales;f__Campylobacteraceae":0.0,"k__Bacteria;p__Proteobacteria;c__Gammaproteobacteria;__;__":0.0,"k__Bacteria;p__Proteobacteria;c__Gammaproteobacteria;o__Aeromonadales;f__Aeromonadaceae":0.0,"k__Bacteria;p__Proteobacteria;c__Gammaproteobacteria;o__Aeromonadales;f__Succinivibrionaceae":0.0,"k__Bacteria;p__Proteobacteria;c__Gammaproteobacteria;o__Pseudomonadales;f__Moraxellaceae":0.0,"k__Bacteria;p__Proteobacteria;c__Gammaproteobacteria;o__Pseudomonadales;f__Pseudomonadaceae":0.0,"k__Bacteria;p__Proteobacteria;c__Gammaproteobacteria;o__Xanthomonadales;f__Xanthomonadaceae":0.0,"k__Bacteria;p__SAR406;c__AB16;o__noFP_H7;f__":0.0,"k__Bacteria;p__SR1;c__;o__;f__":168.0,"k__Bacteria;p__Spirochaetes;c__MVP-15;o__PL-11B10;f__":0.0,"k__Bacteria;p__Spirochaetes;c__Spirochaetes;o__Sphaerochaetales;f__Sphaerochaetaceae":49.0,"k__Bacteria;p__Spirochaetes;c__Spirochaetes;o__Spirochaetales;f__Spirochaetaceae":139.0,"k__Bacteria;p__Spirochaetes;c__[Leptospirae];o__[Leptospirales];f__Sediment-4":9.0,"k__Bacteria;p__Synergistetes;c__Synergistia;o__Synergistales;f__":66.0,"k__Bacteria;p__Synergistetes;c__Synergistia;o__Synergistales;f__Anaerobaculaceae":0.0,"k__Bacteria;p__Synergistetes;c__Synergistia;o__Synergistales;f__Dethiosulfovibrionaceae":25.0,"k__Bacteria;p__Synergistetes;c__Synergistia;o__Synergistales;f__Synergistaceae":36.0,"k__Bacteria;p__Synergistetes;c__Synergistia;o__Synergistales;f__Thermovirgaceae":31.0,"k__Bacteria;p__TA06;c__;o__;f__":0.0,"k__Bacteria;p__TM7;c__TM7-1;o__;f__":0.0,"k__Bacteria;p__TM7;c__TM7-3;__;__":0.0,"k__Bacteria;p__TM7;c__TM7-3;o__;f__":0.0,"k__Bacteria;p__TM7;c__TM7-3;o__CW040;f__F16":67.0,"k__Bacteria;p__TM7;c__TM7-3;o__I025;f__":0.0,"k__Bacteria;p__Tenericutes;c__Mollicutes;o__;f__":7.0,"k__Bacteria;p__Tenericutes;c__Mollicutes;o__Acholeplasmatales;f__Acholeplasmataceae":95.0,"k__Bacteria;p__Tenericutes;c__Mollicutes;o__RF39;f__":0.0,"k__Bacteria;p__Tenericutes;c__RF3;o__ML615J-28;f__":182.0,"k__Bacteria;p__Thermotogae;c__Thermotogae;o__Thermotogales;f__Thermotogaceae":0.0,"k__Bacteria;p__Verrucomicrobia;c__Verruco-5;o__LD1-PB3;f__":0.0,"k__Bacteria;p__Verrucomicrobia;c__[Pedosphaerae];o__[Pedosphaerales];f__R4-41B":6.0,"k__Bacteria;p__WPS-2;c__;o__;f__":0.0,"k__Bacteria;p__WS6;c__SC72;o__A-2AF;f__":3.0,"k__Bacteria;p__WS6;c__SC72;o__WCHB1-15;f__":0.0,"k__Bacteria;p__WWE1;c__[Cloacamonae];o__[Cloacamonales];f__":0.0,"k__Bacteria;p__WWE1;c__[Cloacamonae];o__[Cloacamonales];f__CW-1":18.0,"k__Bacteria;p__WWE1;c__[Cloacamonae];o__[Cloacamonales];f__[Cloacamonaceae]":450.0,"plant type":"Biogas","plant no.":"#09"},{"index":"10_U341F-U806R-NW3-11","k__Archaea;p__Crenarchaeota;c__MCG;o__pGrfC26;f__":0.0,"k__Archaea;p__Euryarchaeota;c__Methanobacteria;o__Methanobacteriales;f__Methanobacteriaceae":81.0,"k__Archaea;p__Euryarchaeota;c__Methanobacteria;o__Methanobacteriales;f__WSA2":0.0,"k__Archaea;p__Euryarchaeota;c__Methanomicrobia;o__Methanomicrobiales;f__Methanomicrobiaceae":0.0,"k__Archaea;p__Euryarchaeota;c__Methanomicrobia;o__Methanomicrobiales;f__Methanoregulaceae":0.0,"k__Archaea;p__Euryarchaeota;c__Methanomicrobia;o__Methanomicrobiales;f__Methanospirillaceae":0.0,"k__Archaea;p__Euryarchaeota;c__Methanomicrobia;o__Methanosarcinales;f__Methanosaetaceae":0.0,"k__Archaea;p__Euryarchaeota;c__Methanomicrobia;o__Methanosarcinales;f__Methanosarcinaceae":0.0,"k__Archaea;p__Euryarchaeota;c__Thermoplasmata;o__E2;f__[Methanomassiliicoccaceae]":0.0,"k__Archaea;p__[Parvarchaeota];c__[Parvarchaea];o__WCHD3-30;f__":0.0,"k__Bacteria;__;__;__;__":20.0,"k__Bacteria;p__;c__;o__;f__":442.0,"k__Bacteria;p__Acidobacteria;c__BPC102;o__MVS-40;f__":0.0,"k__Bacteria;p__Acidobacteria;c__Solibacteres;o__Solibacterales;f__AKIW659":0.0,"k__Bacteria;p__Acidobacteria;c__[Chloracidobacteria];o__RB41;f__Ellin6075":0.0,"k__Bacteria;p__Actinobacteria;c__;o__;f__":0.0,"k__Bacteria;p__Actinobacteria;c__Acidimicrobiia;o__Acidimicrobiales;f__":0.0,"k__Bacteria;p__Actinobacteria;c__Acidimicrobiia;o__Acidimicrobiales;f__C111":0.0,"k__Bacteria;p__Actinobacteria;c__Acidimicrobiia;o__Acidimicrobiales;f__Microthrixaceae":0.0,"k__Bacteria;p__Actinobacteria;c__Actinobacteria;o__Actinomycetales;__":0.0,"k__Bacteria;p__Actinobacteria;c__Actinobacteria;o__Actinomycetales;f__Corynebacteriaceae":0.0,"k__Bacteria;p__Actinobacteria;c__Actinobacteria;o__Actinomycetales;f__Dermatophilaceae":0.0,"k__Bacteria;p__Actinobacteria;c__Actinobacteria;o__Actinomycetales;f__Intrasporangiaceae":0.0,"k__Bacteria;p__Actinobacteria;c__Actinobacteria;o__Actinomycetales;f__Microbacteriaceae":0.0,"k__Bacteria;p__Actinobacteria;c__Actinobacteria;o__Actinomycetales;f__Nocardioidaceae":0.0,"k__Bacteria;p__Actinobacteria;c__Actinobacteria;o__Actinomycetales;f__Nocardiopsaceae":0.0,"k__Bacteria;p__Actinobacteria;c__Actinobacteria;o__Actinomycetales;f__Pseudonocardiaceae":0.0,"k__Bacteria;p__Actinobacteria;c__Actinobacteria;o__Actinomycetales;f__Streptomycetaceae":0.0,"k__Bacteria;p__Actinobacteria;c__Actinobacteria;o__Bifidobacteriales;f__Bifidobacteriaceae":0.0,"k__Bacteria;p__Actinobacteria;c__Actinobacteria;o__WCHB1-81;f__At425_EubF1":0.0,"k__Bacteria;p__Actinobacteria;c__Coriobacteriia;o__Coriobacteriales;f__Coriobacteriaceae":0.0,"k__Bacteria;p__Armatimonadetes;c__SJA-176;o__GAB-B06;f__":0.0,"k__Bacteria;p__Bacteroidetes;__;__;__":885.0,"k__Bacteria;p__Bacteroidetes;c__Bacteroidia;o__Bacteroidales;__":217.0,"k__Bacteria;p__Bacteroidetes;c__Bacteroidia;o__Bacteroidales;f__":192.0,"k__Bacteria;p__Bacteroidetes;c__Bacteroidia;o__Bacteroidales;f__Bacteroidaceae":0.0,"k__Bacteria;p__Bacteroidetes;c__Bacteroidia;o__Bacteroidales;f__Marinilabiaceae":0.0,"k__Bacteria;p__Bacteroidetes;c__Bacteroidia;o__Bacteroidales;f__Porphyromonadaceae":15.0,"k__Bacteria;p__Bacteroidetes;c__Bacteroidia;o__Bacteroidales;f__Prevotellaceae":0.0,"k__Bacteria;p__Bacteroidetes;c__Bacteroidia;o__Bacteroidales;f__Rikenellaceae":0.0,"k__Bacteria;p__Bacteroidetes;c__Flavobacteriia;o__Flavobacteriales;f__Flavobacteriaceae":0.0,"k__Bacteria;p__Bacteroidetes;c__Sphingobacteriia;o__Sphingobacteriales;f__Sphingobacteriaceae":0.0,"k__Bacteria;p__Bacteroidetes;c__[Saprospirae];o__[Saprospirales];f__Chitinophagaceae":0.0,"k__Bacteria;p__Bacteroidetes;c__[Saprospirae];o__[Saprospirales];f__Saprospiraceae":0.0,"k__Bacteria;p__Caldiserica;c__OP5;o__WCHB1-02;f__SHBZ1169":0.0,"k__Bacteria;p__Caldiserica;c__TTA-B1;o__;f__":0.0,"k__Bacteria;p__Chlorobi;c__Ignavibacteria;o__Ignavibacteriales;f__Ignavibacteriaceae":0.0,"k__Bacteria;p__Chlorobi;c__SJA-28;o__;f__":0.0,"k__Bacteria;p__Chloroflexi;c__;o__;f__":0.0,"k__Bacteria;p__Chloroflexi;c__Anaerolineae;o__Anaerolineales;f__Anaerolinaceae":0.0,"k__Bacteria;p__Chloroflexi;c__Anaerolineae;o__Caldilineales;f__Caldilineaceae":0.0,"k__Bacteria;p__Chloroflexi;c__Anaerolineae;o__OPB11;f__":0.0,"k__Bacteria;p__Chloroflexi;c__Anaerolineae;o__SBR1031;f__SHA-31":0.0,"k__Bacteria;p__Chloroflexi;c__Anaerolineae;o__SHA-20;f__":0.0,"k__Bacteria;p__Chloroflexi;c__Dehalococcoidetes;o__Dehalococcoidales;__":0.0,"k__Bacteria;p__Chloroflexi;c__Ellin6529;o__;f__":0.0,"k__Bacteria;p__Chloroflexi;c__TK17;o__mle1-48;f__":0.0,"k__Bacteria;p__Chloroflexi;c__Thermomicrobia;o__JG30-KF-CM45;f__":0.0,"k__Bacteria;p__Cyanobacteria;c__Chloroplast;o__Streptophyta;f__":0.0,"k__Bacteria;p__EM3;c__;o__;f__":0.0,"k__Bacteria;p__Fibrobacteres;c__Fibrobacteria;o__Fibrobacterales;f__":0.0,"k__Bacteria;p__Fibrobacteres;c__Fibrobacteria;o__Fibrobacterales;f__Fibrobacteraceae":0.0,"k__Bacteria;p__Fibrobacteres;c__TG3;o__TG3-1;f__TSCOR003-O20":0.0,"k__Bacteria;p__Firmicutes;c__Bacilli;__;__":0.0,"k__Bacteria;p__Firmicutes;c__Bacilli;o__Bacillales;__":0.0,"k__Bacteria;p__Firmicutes;c__Bacilli;o__Bacillales;f__Bacillaceae":0.0,"k__Bacteria;p__Firmicutes;c__Bacilli;o__Bacillales;f__Paenibacillaceae":0.0,"k__Bacteria;p__Firmicutes;c__Bacilli;o__Bacillales;f__Planococcaceae":0.0,"k__Bacteria;p__Firmicutes;c__Bacilli;o__Bacillales;f__Staphylococcaceae":0.0,"k__Bacteria;p__Firmicutes;c__Bacilli;o__Bacillales;f__Thermoactinomycetaceae":0.0,"k__Bacteria;p__Firmicutes;c__Bacilli;o__Haloplasmatales;f__Haloplasmataceae":37.0,"k__Bacteria;p__Firmicutes;c__Bacilli;o__Lactobacillales;f__Aerococcaceae":0.0,"k__Bacteria;p__Firmicutes;c__Bacilli;o__Lactobacillales;f__Carnobacteriaceae":0.0,"k__Bacteria;p__Firmicutes;c__Bacilli;o__Lactobacillales;f__Enterococcaceae":0.0,"k__Bacteria;p__Firmicutes;c__Bacilli;o__Lactobacillales;f__Lactobacillaceae":0.0,"k__Bacteria;p__Firmicutes;c__Bacilli;o__Lactobacillales;f__Leuconostocaceae":0.0,"k__Bacteria;p__Firmicutes;c__Bacilli;o__Lactobacillales;f__Streptococcaceae":0.0,"k__Bacteria;p__Firmicutes;c__Bacilli;o__Turicibacterales;f__Turicibacteraceae":10.0,"k__Bacteria;p__Firmicutes;c__Clostridia;__;__":512.0,"k__Bacteria;p__Firmicutes;c__Clostridia;o__;f__":17.0,"k__Bacteria;p__Firmicutes;c__Clostridia;o__BSA2B-08;f__":44.0,"k__Bacteria;p__Firmicutes;c__Clostridia;o__Clostridiales;__":97.0,"k__Bacteria;p__Firmicutes;c__Clostridia;o__Clostridiales;f__":24.0,"k__Bacteria;p__Firmicutes;c__Clostridia;o__Clostridiales;f__Caldicoprobacteraceae":77.0,"k__Bacteria;p__Firmicutes;c__Clostridia;o__Clostridiales;f__Christensenellaceae":0.0,"k__Bacteria;p__Firmicutes;c__Clostridia;o__Clostridiales;f__Clostridiaceae":262.0,"k__Bacteria;p__Firmicutes;c__Clostridia;o__Clostridiales;f__Dehalobacteriaceae":0.0,"k__Bacteria;p__Firmicutes;c__Clostridia;o__Clostridiales;f__EtOH8":0.0,"k__Bacteria;p__Firmicutes;c__Clostridia;o__Clostridiales;f__Eubacteriaceae":0.0,"k__Bacteria;p__Firmicutes;c__Clostridia;o__Clostridiales;f__Gracilibacteraceae":16.0,"k__Bacteria;p__Firmicutes;c__Clostridia;o__Clostridiales;f__Lachnospiraceae":6.0,"k__Bacteria;p__Firmicutes;c__Clostridia;o__Clostridiales;f__Peptococcaceae":31.0,"k__Bacteria;p__Firmicutes;c__Clostridia;o__Clostridiales;f__Peptostreptococcaceae":18.0,"k__Bacteria;p__Firmicutes;c__Clostridia;o__Clostridiales;f__Ruminococcaceae":516.0,"k__Bacteria;p__Firmicutes;c__Clostridia;o__Clostridiales;f__Syntrophomonadaceae":36.0,"k__Bacteria;p__Firmicutes;c__Clostridia;o__Clostridiales;f__Veillonellaceae":0.0,"k__Bacteria;p__Firmicutes;c__Clostridia;o__Clostridiales;f__[Mogibacteriaceae]":32.0,"k__Bacteria;p__Firmicutes;c__Clostridia;o__Clostridiales;f__[Tissierellaceae]":230.0,"k__Bacteria;p__Firmicutes;c__Clostridia;o__Halanaerobiales;f__Halanaerobiaceae":240.0,"k__Bacteria;p__Firmicutes;c__Clostridia;o__MBA08;f__":3926.0,"k__Bacteria;p__Firmicutes;c__Clostridia;o__Natranaerobiales;f__":0.0,"k__Bacteria;p__Firmicutes;c__Clostridia;o__Natranaerobiales;f__Anaerobrancaceae":26.0,"k__Bacteria;p__Firmicutes;c__Clostridia;o__Natranaerobiales;f__ML1228J-1":0.0,"k__Bacteria;p__Firmicutes;c__Clostridia;o__Natranaerobiales;f__YAB3B13":0.0,"k__Bacteria;p__Firmicutes;c__Clostridia;o__OPB54;f__":36.0,"k__Bacteria;p__Firmicutes;c__Clostridia;o__SHA-98;f__":1222.0,"k__Bacteria;p__Firmicutes;c__Clostridia;o__SHA-98;f__D2":98.0,"k__Bacteria;p__Firmicutes;c__Clostridia;o__Thermoanaerobacterales;f__":253.0,"k__Bacteria;p__Firmicutes;c__Clostridia;o__Thermoanaerobacterales;f__Thermoanaerobacteraceae":219.0,"k__Bacteria;p__Firmicutes;c__Clostridia;o__Thermoanaerobacterales;f__Thermodesulfobiaceae":0.0,"k__Bacteria;p__Firmicutes;c__Erysipelotrichi;o__Erysipelotrichales;f__Erysipelotrichaceae":0.0,"k__Bacteria;p__Firmicutes;c__OPB54;o__;f__":133.0,"k__Bacteria;p__NKB19;c__noFP_H4;o__;f__":0.0,"k__Bacteria;p__OD1;c__;o__;f__":0.0,"k__Bacteria;p__OD1;c__ABY1;o__;f__":0.0,"k__Bacteria;p__OP1;c__OPB14;o__;f__":0.0,"k__Bacteria;p__OP8;c__OP8_1;o__OPB95;f__":0.0,"k__Bacteria;p__OP9;c__JS1;o__BA021;f__":0.0,"k__Bacteria;p__OP9;c__OPB46;o__OPB72;f__TIBD11":15.0,"k__Bacteria;p__OP9;c__OPB46;o__SHA-1;f__":0.0,"k__Bacteria;p__Proteobacteria;c__Alphaproteobacteria;__;__":0.0,"k__Bacteria;p__Proteobacteria;c__Alphaproteobacteria;o__Rhizobiales;f__Hyphomicrobiaceae":0.0,"k__Bacteria;p__Proteobacteria;c__Alphaproteobacteria;o__Rhizobiales;f__Methylobacteriaceae":0.0,"k__Bacteria;p__Proteobacteria;c__Alphaproteobacteria;o__Rhizobiales;f__Methylocystaceae":0.0,"k__Bacteria;p__Proteobacteria;c__Alphaproteobacteria;o__Rhodobacterales;f__Rhodobacteraceae":0.0,"k__Bacteria;p__Proteobacteria;c__Alphaproteobacteria;o__Rhodospirillales;f__Rhodospirillaceae":0.0,"k__Bacteria;p__Proteobacteria;c__Alphaproteobacteria;o__Sphingomonadales;__":0.0,"k__Bacteria;p__Proteobacteria;c__Betaproteobacteria;__;__":0.0,"k__Bacteria;p__Proteobacteria;c__Betaproteobacteria;o__Burkholderiales;f__Alcaligenaceae":0.0,"k__Bacteria;p__Proteobacteria;c__Betaproteobacteria;o__Burkholderiales;f__Burkholderiaceae":0.0,"k__Bacteria;p__Proteobacteria;c__Betaproteobacteria;o__Burkholderiales;f__Comamonadaceae":0.0,"k__Bacteria;p__Proteobacteria;c__Betaproteobacteria;o__Thiobacterales;f__Thiobacteraceae":0.0,"k__Bacteria;p__Proteobacteria;c__Deltaproteobacteria;__;__":0.0,"k__Bacteria;p__Proteobacteria;c__Deltaproteobacteria;o__;f__":0.0,"k__Bacteria;p__Proteobacteria;c__Deltaproteobacteria;o__Syntrophobacterales;f__Syntrophaceae":0.0,"k__Bacteria;p__Proteobacteria;c__Deltaproteobacteria;o__Syntrophobacterales;f__Syntrophorhabdaceae":0.0,"k__Bacteria;p__Proteobacteria;c__Epsilonproteobacteria;o__Campylobacterales;f__Campylobacteraceae":0.0,"k__Bacteria;p__Proteobacteria;c__Gammaproteobacteria;__;__":0.0,"k__Bacteria;p__Proteobacteria;c__Gammaproteobacteria;o__Aeromonadales;f__Aeromonadaceae":0.0,"k__Bacteria;p__Proteobacteria;c__Gammaproteobacteria;o__Aeromonadales;f__Succinivibrionaceae":0.0,"k__Bacteria;p__Proteobacteria;c__Gammaproteobacteria;o__Pseudomonadales;f__Moraxellaceae":0.0,"k__Bacteria;p__Proteobacteria;c__Gammaproteobacteria;o__Pseudomonadales;f__Pseudomonadaceae":0.0,"k__Bacteria;p__Proteobacteria;c__Gammaproteobacteria;o__Xanthomonadales;f__Xanthomonadaceae":0.0,"k__Bacteria;p__SAR406;c__AB16;o__noFP_H7;f__":0.0,"k__Bacteria;p__SR1;c__;o__;f__":0.0,"k__Bacteria;p__Spirochaetes;c__MVP-15;o__PL-11B10;f__":0.0,"k__Bacteria;p__Spirochaetes;c__Spirochaetes;o__Sphaerochaetales;f__Sphaerochaetaceae":0.0,"k__Bacteria;p__Spirochaetes;c__Spirochaetes;o__Spirochaetales;f__Spirochaetaceae":0.0,"k__Bacteria;p__Spirochaetes;c__[Leptospirae];o__[Leptospirales];f__Sediment-4":0.0,"k__Bacteria;p__Synergistetes;c__Synergistia;o__Synergistales;f__":0.0,"k__Bacteria;p__Synergistetes;c__Synergistia;o__Synergistales;f__Anaerobaculaceae":55.0,"k__Bacteria;p__Synergistetes;c__Synergistia;o__Synergistales;f__Dethiosulfovibrionaceae":0.0,"k__Bacteria;p__Synergistetes;c__Synergistia;o__Synergistales;f__Synergistaceae":0.0,"k__Bacteria;p__Synergistetes;c__Synergistia;o__Synergistales;f__Thermovirgaceae":0.0,"k__Bacteria;p__TA06;c__;o__;f__":0.0,"k__Bacteria;p__TM7;c__TM7-1;o__;f__":0.0,"k__Bacteria;p__TM7;c__TM7-3;__;__":0.0,"k__Bacteria;p__TM7;c__TM7-3;o__;f__":0.0,"k__Bacteria;p__TM7;c__TM7-3;o__CW040;f__F16":0.0,"k__Bacteria;p__TM7;c__TM7-3;o__I025;f__":0.0,"k__Bacteria;p__Tenericutes;c__Mollicutes;o__;f__":0.0,"k__Bacteria;p__Tenericutes;c__Mollicutes;o__Acholeplasmatales;f__Acholeplasmataceae":0.0,"k__Bacteria;p__Tenericutes;c__Mollicutes;o__RF39;f__":0.0,"k__Bacteria;p__Tenericutes;c__RF3;o__ML615J-28;f__":175.0,"k__Bacteria;p__Thermotogae;c__Thermotogae;o__Thermotogales;f__Thermotogaceae":1476.0,"k__Bacteria;p__Verrucomicrobia;c__Verruco-5;o__LD1-PB3;f__":0.0,"k__Bacteria;p__Verrucomicrobia;c__[Pedosphaerae];o__[Pedosphaerales];f__R4-41B":0.0,"k__Bacteria;p__WPS-2;c__;o__;f__":0.0,"k__Bacteria;p__WS6;c__SC72;o__A-2AF;f__":0.0,"k__Bacteria;p__WS6;c__SC72;o__WCHB1-15;f__":0.0,"k__Bacteria;p__WWE1;c__[Cloacamonae];o__[Cloacamonales];f__":0.0,"k__Bacteria;p__WWE1;c__[Cloacamonae];o__[Cloacamonales];f__CW-1":0.0,"k__Bacteria;p__WWE1;c__[Cloacamonae];o__[Cloacamonales];f__[Cloacamonaceae]":0.0,"plant type":"Biogas","plant no.":"#10"},{"index":"11_U341F-U806R-NW3-12","k__Archaea;p__Crenarchaeota;c__MCG;o__pGrfC26;f__":0.0,"k__Archaea;p__Euryarchaeota;c__Methanobacteria;o__Methanobacteriales;f__Methanobacteriaceae":0.0,"k__Archaea;p__Euryarchaeota;c__Methanobacteria;o__Methanobacteriales;f__WSA2":0.0,"k__Archaea;p__Euryarchaeota;c__Methanomicrobia;o__Methanomicrobiales;f__Methanomicrobiaceae":11.0,"k__Archaea;p__Euryarchaeota;c__Methanomicrobia;o__Methanomicrobiales;f__Methanoregulaceae":0.0,"k__Archaea;p__Euryarchaeota;c__Methanomicrobia;o__Methanomicrobiales;f__Methanospirillaceae":0.0,"k__Archaea;p__Euryarchaeota;c__Methanomicrobia;o__Methanosarcinales;f__Methanosaetaceae":18.0,"k__Archaea;p__Euryarchaeota;c__Methanomicrobia;o__Methanosarcinales;f__Methanosarcinaceae":0.0,"k__Archaea;p__Euryarchaeota;c__Thermoplasmata;o__E2;f__[Methanomassiliicoccaceae]":6.0,"k__Archaea;p__[Parvarchaeota];c__[Parvarchaea];o__WCHD3-30;f__":0.0,"k__Bacteria;__;__;__;__":126.0,"k__Bacteria;p__;c__;o__;f__":266.0,"k__Bacteria;p__Acidobacteria;c__BPC102;o__MVS-40;f__":19.0,"k__Bacteria;p__Acidobacteria;c__Solibacteres;o__Solibacterales;f__AKIW659":0.0,"k__Bacteria;p__Acidobacteria;c__[Chloracidobacteria];o__RB41;f__Ellin6075":0.0,"k__Bacteria;p__Actinobacteria;c__;o__;f__":0.0,"k__Bacteria;p__Actinobacteria;c__Acidimicrobiia;o__Acidimicrobiales;f__":0.0,"k__Bacteria;p__Actinobacteria;c__Acidimicrobiia;o__Acidimicrobiales;f__C111":0.0,"k__Bacteria;p__Actinobacteria;c__Acidimicrobiia;o__Acidimicrobiales;f__Microthrixaceae":0.0,"k__Bacteria;p__Actinobacteria;c__Actinobacteria;o__Actinomycetales;__":0.0,"k__Bacteria;p__Actinobacteria;c__Actinobacteria;o__Actinomycetales;f__Corynebacteriaceae":0.0,"k__Bacteria;p__Actinobacteria;c__Actinobacteria;o__Actinomycetales;f__Dermatophilaceae":0.0,"k__Bacteria;p__Actinobacteria;c__Actinobacteria;o__Actinomycetales;f__Intrasporangiaceae":0.0,"k__Bacteria;p__Actinobacteria;c__Actinobacteria;o__Actinomycetales;f__Microbacteriaceae":0.0,"k__Bacteria;p__Actinobacteria;c__Actinobacteria;o__Actinomycetales;f__Nocardioidaceae":0.0,"k__Bacteria;p__Actinobacteria;c__Actinobacteria;o__Actinomycetales;f__Nocardiopsaceae":0.0,"k__Bacteria;p__Actinobacteria;c__Actinobacteria;o__Actinomycetales;f__Pseudonocardiaceae":0.0,"k__Bacteria;p__Actinobacteria;c__Actinobacteria;o__Actinomycetales;f__Streptomycetaceae":0.0,"k__Bacteria;p__Actinobacteria;c__Actinobacteria;o__Bifidobacteriales;f__Bifidobacteriaceae":0.0,"k__Bacteria;p__Actinobacteria;c__Actinobacteria;o__WCHB1-81;f__At425_EubF1":0.0,"k__Bacteria;p__Actinobacteria;c__Coriobacteriia;o__Coriobacteriales;f__Coriobacteriaceae":0.0,"k__Bacteria;p__Armatimonadetes;c__SJA-176;o__GAB-B06;f__":0.0,"k__Bacteria;p__Bacteroidetes;__;__;__":226.0,"k__Bacteria;p__Bacteroidetes;c__Bacteroidia;o__Bacteroidales;__":351.0,"k__Bacteria;p__Bacteroidetes;c__Bacteroidia;o__Bacteroidales;f__":193.0,"k__Bacteria;p__Bacteroidetes;c__Bacteroidia;o__Bacteroidales;f__Bacteroidaceae":265.0,"k__Bacteria;p__Bacteroidetes;c__Bacteroidia;o__Bacteroidales;f__Marinilabiaceae":61.0,"k__Bacteria;p__Bacteroidetes;c__Bacteroidia;o__Bacteroidales;f__Porphyromonadaceae":322.0,"k__Bacteria;p__Bacteroidetes;c__Bacteroidia;o__Bacteroidales;f__Prevotellaceae":0.0,"k__Bacteria;p__Bacteroidetes;c__Bacteroidia;o__Bacteroidales;f__Rikenellaceae":0.0,"k__Bacteria;p__Bacteroidetes;c__Flavobacteriia;o__Flavobacteriales;f__Flavobacteriaceae":0.0,"k__Bacteria;p__Bacteroidetes;c__Sphingobacteriia;o__Sphingobacteriales;f__Sphingobacteriaceae":0.0,"k__Bacteria;p__Bacteroidetes;c__[Saprospirae];o__[Saprospirales];f__Chitinophagaceae":0.0,"k__Bacteria;p__Bacteroidetes;c__[Saprospirae];o__[Saprospirales];f__Saprospiraceae":0.0,"k__Bacteria;p__Caldiserica;c__OP5;o__WCHB1-02;f__SHBZ1169":0.0,"k__Bacteria;p__Caldiserica;c__TTA-B1;o__;f__":0.0,"k__Bacteria;p__Chlorobi;c__Ignavibacteria;o__Ignavibacteriales;f__Ignavibacteriaceae":0.0,"k__Bacteria;p__Chlorobi;c__SJA-28;o__;f__":0.0,"k__Bacteria;p__Chloroflexi;c__;o__;f__":0.0,"k__Bacteria;p__Chloroflexi;c__Anaerolineae;o__Anaerolineales;f__Anaerolinaceae":0.0,"k__Bacteria;p__Chloroflexi;c__Anaerolineae;o__Caldilineales;f__Caldilineaceae":0.0,"k__Bacteria;p__Chloroflexi;c__Anaerolineae;o__OPB11;f__":0.0,"k__Bacteria;p__Chloroflexi;c__Anaerolineae;o__SBR1031;f__SHA-31":0.0,"k__Bacteria;p__Chloroflexi;c__Anaerolineae;o__SHA-20;f__":0.0,"k__Bacteria;p__Chloroflexi;c__Dehalococcoidetes;o__Dehalococcoidales;__":0.0,"k__Bacteria;p__Chloroflexi;c__Ellin6529;o__;f__":0.0,"k__Bacteria;p__Chloroflexi;c__TK17;o__mle1-48;f__":0.0,"k__Bacteria;p__Chloroflexi;c__Thermomicrobia;o__JG30-KF-CM45;f__":0.0,"k__Bacteria;p__Cyanobacteria;c__Chloroplast;o__Streptophyta;f__":0.0,"k__Bacteria;p__EM3;c__;o__;f__":0.0,"k__Bacteria;p__Fibrobacteres;c__Fibrobacteria;o__Fibrobacterales;f__":0.0,"k__Bacteria;p__Fibrobacteres;c__Fibrobacteria;o__Fibrobacterales;f__Fibrobacteraceae":7.0,"k__Bacteria;p__Fibrobacteres;c__TG3;o__TG3-1;f__TSCOR003-O20":22.0,"k__Bacteria;p__Firmicutes;c__Bacilli;__;__":0.0,"k__Bacteria;p__Firmicutes;c__Bacilli;o__Bacillales;__":0.0,"k__Bacteria;p__Firmicutes;c__Bacilli;o__Bacillales;f__Bacillaceae":0.0,"k__Bacteria;p__Firmicutes;c__Bacilli;o__Bacillales;f__Paenibacillaceae":0.0,"k__Bacteria;p__Firmicutes;c__Bacilli;o__Bacillales;f__Planococcaceae":0.0,"k__Bacteria;p__Firmicutes;c__Bacilli;o__Bacillales;f__Staphylococcaceae":0.0,"k__Bacteria;p__Firmicutes;c__Bacilli;o__Bacillales;f__Thermoactinomycetaceae":0.0,"k__Bacteria;p__Firmicutes;c__Bacilli;o__Haloplasmatales;f__Haloplasmataceae":0.0,"k__Bacteria;p__Firmicutes;c__Bacilli;o__Lactobacillales;f__Aerococcaceae":0.0,"k__Bacteria;p__Firmicutes;c__Bacilli;o__Lactobacillales;f__Carnobacteriaceae":0.0,"k__Bacteria;p__Firmicutes;c__Bacilli;o__Lactobacillales;f__Enterococcaceae":17.0,"k__Bacteria;p__Firmicutes;c__Bacilli;o__Lactobacillales;f__Lactobacillaceae":0.0,"k__Bacteria;p__Firmicutes;c__Bacilli;o__Lactobacillales;f__Leuconostocaceae":0.0,"k__Bacteria;p__Firmicutes;c__Bacilli;o__Lactobacillales;f__Streptococcaceae":37.0,"k__Bacteria;p__Firmicutes;c__Bacilli;o__Turicibacterales;f__Turicibacteraceae":10.0,"k__Bacteria;p__Firmicutes;c__Clostridia;__;__":329.0,"k__Bacteria;p__Firmicutes;c__Clostridia;o__;f__":9.0,"k__Bacteria;p__Firmicutes;c__Clostridia;o__BSA2B-08;f__":0.0,"k__Bacteria;p__Firmicutes;c__Clostridia;o__Clostridiales;__":224.0,"k__Bacteria;p__Firmicutes;c__Clostridia;o__Clostridiales;f__":179.0,"k__Bacteria;p__Firmicutes;c__Clostridia;o__Clostridiales;f__Caldicoprobacteraceae":318.0,"k__Bacteria;p__Firmicutes;c__Clostridia;o__Clostridiales;f__Christensenellaceae":0.0,"k__Bacteria;p__Firmicutes;c__Clostridia;o__Clostridiales;f__Clostridiaceae":801.0,"k__Bacteria;p__Firmicutes;c__Clostridia;o__Clostridiales;f__Dehalobacteriaceae":0.0,"k__Bacteria;p__Firmicutes;c__Clostridia;o__Clostridiales;f__EtOH8":0.0,"k__Bacteria;p__Firmicutes;c__Clostridia;o__Clostridiales;f__Eubacteriaceae":0.0,"k__Bacteria;p__Firmicutes;c__Clostridia;o__Clostridiales;f__Gracilibacteraceae":13.0,"k__Bacteria;p__Firmicutes;c__Clostridia;o__Clostridiales;f__Lachnospiraceae":15.0,"k__Bacteria;p__Firmicutes;c__Clostridia;o__Clostridiales;f__Peptococcaceae":40.0,"k__Bacteria;p__Firmicutes;c__Clostridia;o__Clostridiales;f__Peptostreptococcaceae":70.0,"k__Bacteria;p__Firmicutes;c__Clostridia;o__Clostridiales;f__Ruminococcaceae":413.0,"k__Bacteria;p__Firmicutes;c__Clostridia;o__Clostridiales;f__Syntrophomonadaceae":62.0,"k__Bacteria;p__Firmicutes;c__Clostridia;o__Clostridiales;f__Veillonellaceae":0.0,"k__Bacteria;p__Firmicutes;c__Clostridia;o__Clostridiales;f__[Mogibacteriaceae]":75.0,"k__Bacteria;p__Firmicutes;c__Clostridia;o__Clostridiales;f__[Tissierellaceae]":412.0,"k__Bacteria;p__Firmicutes;c__Clostridia;o__Halanaerobiales;f__Halanaerobiaceae":17.0,"k__Bacteria;p__Firmicutes;c__Clostridia;o__MBA08;f__":3666.0,"k__Bacteria;p__Firmicutes;c__Clostridia;o__Natranaerobiales;f__":26.0,"k__Bacteria;p__Firmicutes;c__Clostridia;o__Natranaerobiales;f__Anaerobrancaceae":100.0,"k__Bacteria;p__Firmicutes;c__Clostridia;o__Natranaerobiales;f__ML1228J-1":0.0,"k__Bacteria;p__Firmicutes;c__Clostridia;o__Natranaerobiales;f__YAB3B13":28.0,"k__Bacteria;p__Firmicutes;c__Clostridia;o__OPB54;f__":59.0,"k__Bacteria;p__Firmicutes;c__Clostridia;o__SHA-98;f__":1345.0,"k__Bacteria;p__Firmicutes;c__Clostridia;o__SHA-98;f__D2":20.0,"k__Bacteria;p__Firmicutes;c__Clostridia;o__Thermoanaerobacterales;f__":92.0,"k__Bacteria;p__Firmicutes;c__Clostridia;o__Thermoanaerobacterales;f__Thermoanaerobacteraceae":293.0,"k__Bacteria;p__Firmicutes;c__Clostridia;o__Thermoanaerobacterales;f__Thermodesulfobiaceae":0.0,"k__Bacteria;p__Firmicutes;c__Erysipelotrichi;o__Erysipelotrichales;f__Erysipelotrichaceae":51.0,"k__Bacteria;p__Firmicutes;c__OPB54;o__;f__":107.0,"k__Bacteria;p__NKB19;c__noFP_H4;o__;f__":0.0,"k__Bacteria;p__OD1;c__;o__;f__":32.0,"k__Bacteria;p__OD1;c__ABY1;o__;f__":0.0,"k__Bacteria;p__OP1;c__OPB14;o__;f__":0.0,"k__Bacteria;p__OP8;c__OP8_1;o__OPB95;f__":0.0,"k__Bacteria;p__OP9;c__JS1;o__BA021;f__":0.0,"k__Bacteria;p__OP9;c__OPB46;o__OPB72;f__TIBD11":28.0,"k__Bacteria;p__OP9;c__OPB46;o__SHA-1;f__":29.0,"k__Bacteria;p__Proteobacteria;c__Alphaproteobacteria;__;__":0.0,"k__Bacteria;p__Proteobacteria;c__Alphaproteobacteria;o__Rhizobiales;f__Hyphomicrobiaceae":0.0,"k__Bacteria;p__Proteobacteria;c__Alphaproteobacteria;o__Rhizobiales;f__Methylobacteriaceae":0.0,"k__Bacteria;p__Proteobacteria;c__Alphaproteobacteria;o__Rhizobiales;f__Methylocystaceae":0.0,"k__Bacteria;p__Proteobacteria;c__Alphaproteobacteria;o__Rhodobacterales;f__Rhodobacteraceae":0.0,"k__Bacteria;p__Proteobacteria;c__Alphaproteobacteria;o__Rhodospirillales;f__Rhodospirillaceae":0.0,"k__Bacteria;p__Proteobacteria;c__Alphaproteobacteria;o__Sphingomonadales;__":0.0,"k__Bacteria;p__Proteobacteria;c__Betaproteobacteria;__;__":0.0,"k__Bacteria;p__Proteobacteria;c__Betaproteobacteria;o__Burkholderiales;f__Alcaligenaceae":0.0,"k__Bacteria;p__Proteobacteria;c__Betaproteobacteria;o__Burkholderiales;f__Burkholderiaceae":0.0,"k__Bacteria;p__Proteobacteria;c__Betaproteobacteria;o__Burkholderiales;f__Comamonadaceae":0.0,"k__Bacteria;p__Proteobacteria;c__Betaproteobacteria;o__Thiobacterales;f__Thiobacteraceae":0.0,"k__Bacteria;p__Proteobacteria;c__Deltaproteobacteria;__;__":0.0,"k__Bacteria;p__Proteobacteria;c__Deltaproteobacteria;o__;f__":0.0,"k__Bacteria;p__Proteobacteria;c__Deltaproteobacteria;o__Syntrophobacterales;f__Syntrophaceae":0.0,"k__Bacteria;p__Proteobacteria;c__Deltaproteobacteria;o__Syntrophobacterales;f__Syntrophorhabdaceae":0.0,"k__Bacteria;p__Proteobacteria;c__Epsilonproteobacteria;o__Campylobacterales;f__Campylobacteraceae":0.0,"k__Bacteria;p__Proteobacteria;c__Gammaproteobacteria;__;__":0.0,"k__Bacteria;p__Proteobacteria;c__Gammaproteobacteria;o__Aeromonadales;f__Aeromonadaceae":0.0,"k__Bacteria;p__Proteobacteria;c__Gammaproteobacteria;o__Aeromonadales;f__Succinivibrionaceae":0.0,"k__Bacteria;p__Proteobacteria;c__Gammaproteobacteria;o__Pseudomonadales;f__Moraxellaceae":0.0,"k__Bacteria;p__Proteobacteria;c__Gammaproteobacteria;o__Pseudomonadales;f__Pseudomonadaceae":0.0,"k__Bacteria;p__Proteobacteria;c__Gammaproteobacteria;o__Xanthomonadales;f__Xanthomonadaceae":0.0,"k__Bacteria;p__SAR406;c__AB16;o__noFP_H7;f__":0.0,"k__Bacteria;p__SR1;c__;o__;f__":16.0,"k__Bacteria;p__Spirochaetes;c__MVP-15;o__PL-11B10;f__":0.0,"k__Bacteria;p__Spirochaetes;c__Spirochaetes;o__Sphaerochaetales;f__Sphaerochaetaceae":0.0,"k__Bacteria;p__Spirochaetes;c__Spirochaetes;o__Spirochaetales;f__Spirochaetaceae":26.0,"k__Bacteria;p__Spirochaetes;c__[Leptospirae];o__[Leptospirales];f__Sediment-4":0.0,"k__Bacteria;p__Synergistetes;c__Synergistia;o__Synergistales;f__":18.0,"k__Bacteria;p__Synergistetes;c__Synergistia;o__Synergistales;f__Anaerobaculaceae":220.0,"k__Bacteria;p__Synergistetes;c__Synergistia;o__Synergistales;f__Dethiosulfovibrionaceae":4.0,"k__Bacteria;p__Synergistetes;c__Synergistia;o__Synergistales;f__Synergistaceae":42.0,"k__Bacteria;p__Synergistetes;c__Synergistia;o__Synergistales;f__Thermovirgaceae":0.0,"k__Bacteria;p__TA06;c__;o__;f__":0.0,"k__Bacteria;p__TM7;c__TM7-1;o__;f__":0.0,"k__Bacteria;p__TM7;c__TM7-3;__;__":0.0,"k__Bacteria;p__TM7;c__TM7-3;o__;f__":0.0,"k__Bacteria;p__TM7;c__TM7-3;o__CW040;f__F16":0.0,"k__Bacteria;p__TM7;c__TM7-3;o__I025;f__":0.0,"k__Bacteria;p__Tenericutes;c__Mollicutes;o__;f__":0.0,"k__Bacteria;p__Tenericutes;c__Mollicutes;o__Acholeplasmatales;f__Acholeplasmataceae":44.0,"k__Bacteria;p__Tenericutes;c__Mollicutes;o__RF39;f__":0.0,"k__Bacteria;p__Tenericutes;c__RF3;o__ML615J-28;f__":68.0,"k__Bacteria;p__Thermotogae;c__Thermotogae;o__Thermotogales;f__Thermotogaceae":223.0,"k__Bacteria;p__Verrucomicrobia;c__Verruco-5;o__LD1-PB3;f__":0.0,"k__Bacteria;p__Verrucomicrobia;c__[Pedosphaerae];o__[Pedosphaerales];f__R4-41B":0.0,"k__Bacteria;p__WPS-2;c__;o__;f__":0.0,"k__Bacteria;p__WS6;c__SC72;o__A-2AF;f__":0.0,"k__Bacteria;p__WS6;c__SC72;o__WCHB1-15;f__":0.0,"k__Bacteria;p__WWE1;c__[Cloacamonae];o__[Cloacamonales];f__":0.0,"k__Bacteria;p__WWE1;c__[Cloacamonae];o__[Cloacamonales];f__CW-1":0.0,"k__Bacteria;p__WWE1;c__[Cloacamonae];o__[Cloacamonales];f__[Cloacamonaceae]":1015.0,"plant type":"Biogas","plant no.":"#11"},{"index":"12_U341F-U806R-NW3-14","k__Archaea;p__Crenarchaeota;c__MCG;o__pGrfC26;f__":0.0,"k__Archaea;p__Euryarchaeota;c__Methanobacteria;o__Methanobacteriales;f__Methanobacteriaceae":15.0,"k__Archaea;p__Euryarchaeota;c__Methanobacteria;o__Methanobacteriales;f__WSA2":0.0,"k__Archaea;p__Euryarchaeota;c__Methanomicrobia;o__Methanomicrobiales;f__Methanomicrobiaceae":13.0,"k__Archaea;p__Euryarchaeota;c__Methanomicrobia;o__Methanomicrobiales;f__Methanoregulaceae":0.0,"k__Archaea;p__Euryarchaeota;c__Methanomicrobia;o__Methanomicrobiales;f__Methanospirillaceae":0.0,"k__Archaea;p__Euryarchaeota;c__Methanomicrobia;o__Methanosarcinales;f__Methanosaetaceae":0.0,"k__Archaea;p__Euryarchaeota;c__Methanomicrobia;o__Methanosarcinales;f__Methanosarcinaceae":12.0,"k__Archaea;p__Euryarchaeota;c__Thermoplasmata;o__E2;f__[Methanomassiliicoccaceae]":0.0,"k__Archaea;p__[Parvarchaeota];c__[Parvarchaea];o__WCHD3-30;f__":0.0,"k__Bacteria;__;__;__;__":21.0,"k__Bacteria;p__;c__;o__;f__":247.0,"k__Bacteria;p__Acidobacteria;c__BPC102;o__MVS-40;f__":0.0,"k__Bacteria;p__Acidobacteria;c__Solibacteres;o__Solibacterales;f__AKIW659":0.0,"k__Bacteria;p__Acidobacteria;c__[Chloracidobacteria];o__RB41;f__Ellin6075":0.0,"k__Bacteria;p__Actinobacteria;c__;o__;f__":0.0,"k__Bacteria;p__Actinobacteria;c__Acidimicrobiia;o__Acidimicrobiales;f__":0.0,"k__Bacteria;p__Actinobacteria;c__Acidimicrobiia;o__Acidimicrobiales;f__C111":0.0,"k__Bacteria;p__Actinobacteria;c__Acidimicrobiia;o__Acidimicrobiales;f__Microthrixaceae":0.0,"k__Bacteria;p__Actinobacteria;c__Actinobacteria;o__Actinomycetales;__":0.0,"k__Bacteria;p__Actinobacteria;c__Actinobacteria;o__Actinomycetales;f__Corynebacteriaceae":0.0,"k__Bacteria;p__Actinobacteria;c__Actinobacteria;o__Actinomycetales;f__Dermatophilaceae":0.0,"k__Bacteria;p__Actinobacteria;c__Actinobacteria;o__Actinomycetales;f__Intrasporangiaceae":0.0,"k__Bacteria;p__Actinobacteria;c__Actinobacteria;o__Actinomycetales;f__Microbacteriaceae":0.0,"k__Bacteria;p__Actinobacteria;c__Actinobacteria;o__Actinomycetales;f__Nocardioidaceae":0.0,"k__Bacteria;p__Actinobacteria;c__Actinobacteria;o__Actinomycetales;f__Nocardiopsaceae":0.0,"k__Bacteria;p__Actinobacteria;c__Actinobacteria;o__Actinomycetales;f__Pseudonocardiaceae":0.0,"k__Bacteria;p__Actinobacteria;c__Actinobacteria;o__Actinomycetales;f__Streptomycetaceae":0.0,"k__Bacteria;p__Actinobacteria;c__Actinobacteria;o__Bifidobacteriales;f__Bifidobacteriaceae":0.0,"k__Bacteria;p__Actinobacteria;c__Actinobacteria;o__WCHB1-81;f__At425_EubF1":0.0,"k__Bacteria;p__Actinobacteria;c__Coriobacteriia;o__Coriobacteriales;f__Coriobacteriaceae":0.0,"k__Bacteria;p__Armatimonadetes;c__SJA-176;o__GAB-B06;f__":0.0,"k__Bacteria;p__Bacteroidetes;__;__;__":307.0,"k__Bacteria;p__Bacteroidetes;c__Bacteroidia;o__Bacteroidales;__":1857.0,"k__Bacteria;p__Bacteroidetes;c__Bacteroidia;o__Bacteroidales;f__":297.0,"k__Bacteria;p__Bacteroidetes;c__Bacteroidia;o__Bacteroidales;f__Bacteroidaceae":0.0,"k__Bacteria;p__Bacteroidetes;c__Bacteroidia;o__Bacteroidales;f__Marinilabiaceae":134.0,"k__Bacteria;p__Bacteroidetes;c__Bacteroidia;o__Bacteroidales;f__Porphyromonadaceae":70.0,"k__Bacteria;p__Bacteroidetes;c__Bacteroidia;o__Bacteroidales;f__Prevotellaceae":0.0,"k__Bacteria;p__Bacteroidetes;c__Bacteroidia;o__Bacteroidales;f__Rikenellaceae":0.0,"k__Bacteria;p__Bacteroidetes;c__Flavobacteriia;o__Flavobacteriales;f__Flavobacteriaceae":0.0,"k__Bacteria;p__Bacteroidetes;c__Sphingobacteriia;o__Sphingobacteriales;f__Sphingobacteriaceae":0.0,"k__Bacteria;p__Bacteroidetes;c__[Saprospirae];o__[Saprospirales];f__Chitinophagaceae":0.0,"k__Bacteria;p__Bacteroidetes;c__[Saprospirae];o__[Saprospirales];f__Saprospiraceae":0.0,"k__Bacteria;p__Caldiserica;c__OP5;o__WCHB1-02;f__SHBZ1169":0.0,"k__Bacteria;p__Caldiserica;c__TTA-B1;o__;f__":0.0,"k__Bacteria;p__Chlorobi;c__Ignavibacteria;o__Ignavibacteriales;f__Ignavibacteriaceae":0.0,"k__Bacteria;p__Chlorobi;c__SJA-28;o__;f__":0.0,"k__Bacteria;p__Chloroflexi;c__;o__;f__":0.0,"k__Bacteria;p__Chloroflexi;c__Anaerolineae;o__Anaerolineales;f__Anaerolinaceae":0.0,"k__Bacteria;p__Chloroflexi;c__Anaerolineae;o__Caldilineales;f__Caldilineaceae":0.0,"k__Bacteria;p__Chloroflexi;c__Anaerolineae;o__OPB11;f__":0.0,"k__Bacteria;p__Chloroflexi;c__Anaerolineae;o__SBR1031;f__SHA-31":0.0,"k__Bacteria;p__Chloroflexi;c__Anaerolineae;o__SHA-20;f__":0.0,"k__Bacteria;p__Chloroflexi;c__Dehalococcoidetes;o__Dehalococcoidales;__":0.0,"k__Bacteria;p__Chloroflexi;c__Ellin6529;o__;f__":0.0,"k__Bacteria;p__Chloroflexi;c__TK17;o__mle1-48;f__":0.0,"k__Bacteria;p__Chloroflexi;c__Thermomicrobia;o__JG30-KF-CM45;f__":0.0,"k__Bacteria;p__Cyanobacteria;c__Chloroplast;o__Streptophyta;f__":0.0,"k__Bacteria;p__EM3;c__;o__;f__":0.0,"k__Bacteria;p__Fibrobacteres;c__Fibrobacteria;o__Fibrobacterales;f__":0.0,"k__Bacteria;p__Fibrobacteres;c__Fibrobacteria;o__Fibrobacterales;f__Fibrobacteraceae":0.0,"k__Bacteria;p__Fibrobacteres;c__TG3;o__TG3-1;f__TSCOR003-O20":0.0,"k__Bacteria;p__Firmicutes;c__Bacilli;__;__":0.0,"k__Bacteria;p__Firmicutes;c__Bacilli;o__Bacillales;__":0.0,"k__Bacteria;p__Firmicutes;c__Bacilli;o__Bacillales;f__Bacillaceae":0.0,"k__Bacteria;p__Firmicutes;c__Bacilli;o__Bacillales;f__Paenibacillaceae":8.0,"k__Bacteria;p__Firmicutes;c__Bacilli;o__Bacillales;f__Planococcaceae":24.0,"k__Bacteria;p__Firmicutes;c__Bacilli;o__Bacillales;f__Staphylococcaceae":0.0,"k__Bacteria;p__Firmicutes;c__Bacilli;o__Bacillales;f__Thermoactinomycetaceae":0.0,"k__Bacteria;p__Firmicutes;c__Bacilli;o__Haloplasmatales;f__Haloplasmataceae":0.0,"k__Bacteria;p__Firmicutes;c__Bacilli;o__Lactobacillales;f__Aerococcaceae":0.0,"k__Bacteria;p__Firmicutes;c__Bacilli;o__Lactobacillales;f__Carnobacteriaceae":0.0,"k__Bacteria;p__Firmicutes;c__Bacilli;o__Lactobacillales;f__Enterococcaceae":0.0,"k__Bacteria;p__Firmicutes;c__Bacilli;o__Lactobacillales;f__Lactobacillaceae":0.0,"k__Bacteria;p__Firmicutes;c__Bacilli;o__Lactobacillales;f__Leuconostocaceae":8.0,"k__Bacteria;p__Firmicutes;c__Bacilli;o__Lactobacillales;f__Streptococcaceae":47.0,"k__Bacteria;p__Firmicutes;c__Bacilli;o__Turicibacterales;f__Turicibacteraceae":0.0,"k__Bacteria;p__Firmicutes;c__Clostridia;__;__":249.0,"k__Bacteria;p__Firmicutes;c__Clostridia;o__;f__":10.0,"k__Bacteria;p__Firmicutes;c__Clostridia;o__BSA2B-08;f__":0.0,"k__Bacteria;p__Firmicutes;c__Clostridia;o__Clostridiales;__":233.0,"k__Bacteria;p__Firmicutes;c__Clostridia;o__Clostridiales;f__":125.0,"k__Bacteria;p__Firmicutes;c__Clostridia;o__Clostridiales;f__Caldicoprobacteraceae":353.0,"k__Bacteria;p__Firmicutes;c__Clostridia;o__Clostridiales;f__Christensenellaceae":7.0,"k__Bacteria;p__Firmicutes;c__Clostridia;o__Clostridiales;f__Clostridiaceae":695.0,"k__Bacteria;p__Firmicutes;c__Clostridia;o__Clostridiales;f__Dehalobacteriaceae":9.0,"k__Bacteria;p__Firmicutes;c__Clostridia;o__Clostridiales;f__EtOH8":0.0,"k__Bacteria;p__Firmicutes;c__Clostridia;o__Clostridiales;f__Eubacteriaceae":13.0,"k__Bacteria;p__Firmicutes;c__Clostridia;o__Clostridiales;f__Gracilibacteraceae":20.0,"k__Bacteria;p__Firmicutes;c__Clostridia;o__Clostridiales;f__Lachnospiraceae":189.0,"k__Bacteria;p__Firmicutes;c__Clostridia;o__Clostridiales;f__Peptococcaceae":8.0,"k__Bacteria;p__Firmicutes;c__Clostridia;o__Clostridiales;f__Peptostreptococcaceae":7.0,"k__Bacteria;p__Firmicutes;c__Clostridia;o__Clostridiales;f__Ruminococcaceae":739.0,"k__Bacteria;p__Firmicutes;c__Clostridia;o__Clostridiales;f__Syntrophomonadaceae":80.0,"k__Bacteria;p__Firmicutes;c__Clostridia;o__Clostridiales;f__Veillonellaceae":0.0,"k__Bacteria;p__Firmicutes;c__Clostridia;o__Clostridiales;f__[Mogibacteriaceae]":89.0,"k__Bacteria;p__Firmicutes;c__Clostridia;o__Clostridiales;f__[Tissierellaceae]":516.0,"k__Bacteria;p__Firmicutes;c__Clostridia;o__Halanaerobiales;f__Halanaerobiaceae":407.0,"k__Bacteria;p__Firmicutes;c__Clostridia;o__MBA08;f__":2388.0,"k__Bacteria;p__Firmicutes;c__Clostridia;o__Natranaerobiales;f__":0.0,"k__Bacteria;p__Firmicutes;c__Clostridia;o__Natranaerobiales;f__Anaerobrancaceae":18.0,"k__Bacteria;p__Firmicutes;c__Clostridia;o__Natranaerobiales;f__ML1228J-1":0.0,"k__Bacteria;p__Firmicutes;c__Clostridia;o__Natranaerobiales;f__YAB3B13":0.0,"k__Bacteria;p__Firmicutes;c__Clostridia;o__OPB54;f__":43.0,"k__Bacteria;p__Firmicutes;c__Clostridia;o__SHA-98;f__":849.0,"k__Bacteria;p__Firmicutes;c__Clostridia;o__SHA-98;f__D2":62.0,"k__Bacteria;p__Firmicutes;c__Clostridia;o__Thermoanaerobacterales;f__":79.0,"k__Bacteria;p__Firmicutes;c__Clostridia;o__Thermoanaerobacterales;f__Thermoanaerobacteraceae":82.0,"k__Bacteria;p__Firmicutes;c__Clostridia;o__Thermoanaerobacterales;f__Thermodesulfobiaceae":0.0,"k__Bacteria;p__Firmicutes;c__Erysipelotrichi;o__Erysipelotrichales;f__Erysipelotrichaceae":21.0,"k__Bacteria;p__Firmicutes;c__OPB54;o__;f__":94.0,"k__Bacteria;p__NKB19;c__noFP_H4;o__;f__":0.0,"k__Bacteria;p__OD1;c__;o__;f__":10.0,"k__Bacteria;p__OD1;c__ABY1;o__;f__":0.0,"k__Bacteria;p__OP1;c__OPB14;o__;f__":0.0,"k__Bacteria;p__OP8;c__OP8_1;o__OPB95;f__":0.0,"k__Bacteria;p__OP9;c__JS1;o__BA021;f__":0.0,"k__Bacteria;p__OP9;c__OPB46;o__OPB72;f__TIBD11":7.0,"k__Bacteria;p__OP9;c__OPB46;o__SHA-1;f__":0.0,"k__Bacteria;p__Proteobacteria;c__Alphaproteobacteria;__;__":0.0,"k__Bacteria;p__Proteobacteria;c__Alphaproteobacteria;o__Rhizobiales;f__Hyphomicrobiaceae":0.0,"k__Bacteria;p__Proteobacteria;c__Alphaproteobacteria;o__Rhizobiales;f__Methylobacteriaceae":0.0,"k__Bacteria;p__Proteobacteria;c__Alphaproteobacteria;o__Rhizobiales;f__Methylocystaceae":0.0,"k__Bacteria;p__Proteobacteria;c__Alphaproteobacteria;o__Rhodobacterales;f__Rhodobacteraceae":0.0,"k__Bacteria;p__Proteobacteria;c__Alphaproteobacteria;o__Rhodospirillales;f__Rhodospirillaceae":0.0,"k__Bacteria;p__Proteobacteria;c__Alphaproteobacteria;o__Sphingomonadales;__":0.0,"k__Bacteria;p__Proteobacteria;c__Betaproteobacteria;__;__":0.0,"k__Bacteria;p__Proteobacteria;c__Betaproteobacteria;o__Burkholderiales;f__Alcaligenaceae":0.0,"k__Bacteria;p__Proteobacteria;c__Betaproteobacteria;o__Burkholderiales;f__Burkholderiaceae":0.0,"k__Bacteria;p__Proteobacteria;c__Betaproteobacteria;o__Burkholderiales;f__Comamonadaceae":0.0,"k__Bacteria;p__Proteobacteria;c__Betaproteobacteria;o__Thiobacterales;f__Thiobacteraceae":0.0,"k__Bacteria;p__Proteobacteria;c__Deltaproteobacteria;__;__":0.0,"k__Bacteria;p__Proteobacteria;c__Deltaproteobacteria;o__;f__":0.0,"k__Bacteria;p__Proteobacteria;c__Deltaproteobacteria;o__Syntrophobacterales;f__Syntrophaceae":0.0,"k__Bacteria;p__Proteobacteria;c__Deltaproteobacteria;o__Syntrophobacterales;f__Syntrophorhabdaceae":0.0,"k__Bacteria;p__Proteobacteria;c__Epsilonproteobacteria;o__Campylobacterales;f__Campylobacteraceae":0.0,"k__Bacteria;p__Proteobacteria;c__Gammaproteobacteria;__;__":0.0,"k__Bacteria;p__Proteobacteria;c__Gammaproteobacteria;o__Aeromonadales;f__Aeromonadaceae":0.0,"k__Bacteria;p__Proteobacteria;c__Gammaproteobacteria;o__Aeromonadales;f__Succinivibrionaceae":0.0,"k__Bacteria;p__Proteobacteria;c__Gammaproteobacteria;o__Pseudomonadales;f__Moraxellaceae":0.0,"k__Bacteria;p__Proteobacteria;c__Gammaproteobacteria;o__Pseudomonadales;f__Pseudomonadaceae":0.0,"k__Bacteria;p__Proteobacteria;c__Gammaproteobacteria;o__Xanthomonadales;f__Xanthomonadaceae":0.0,"k__Bacteria;p__SAR406;c__AB16;o__noFP_H7;f__":0.0,"k__Bacteria;p__SR1;c__;o__;f__":0.0,"k__Bacteria;p__Spirochaetes;c__MVP-15;o__PL-11B10;f__":0.0,"k__Bacteria;p__Spirochaetes;c__Spirochaetes;o__Sphaerochaetales;f__Sphaerochaetaceae":0.0,"k__Bacteria;p__Spirochaetes;c__Spirochaetes;o__Spirochaetales;f__Spirochaetaceae":0.0,"k__Bacteria;p__Spirochaetes;c__[Leptospirae];o__[Leptospirales];f__Sediment-4":0.0,"k__Bacteria;p__Synergistetes;c__Synergistia;o__Synergistales;f__":0.0,"k__Bacteria;p__Synergistetes;c__Synergistia;o__Synergistales;f__Anaerobaculaceae":70.0,"k__Bacteria;p__Synergistetes;c__Synergistia;o__Synergistales;f__Dethiosulfovibrionaceae":0.0,"k__Bacteria;p__Synergistetes;c__Synergistia;o__Synergistales;f__Synergistaceae":0.0,"k__Bacteria;p__Synergistetes;c__Synergistia;o__Synergistales;f__Thermovirgaceae":0.0,"k__Bacteria;p__TA06;c__;o__;f__":0.0,"k__Bacteria;p__TM7;c__TM7-1;o__;f__":0.0,"k__Bacteria;p__TM7;c__TM7-3;__;__":0.0,"k__Bacteria;p__TM7;c__TM7-3;o__;f__":0.0,"k__Bacteria;p__TM7;c__TM7-3;o__CW040;f__F16":0.0,"k__Bacteria;p__TM7;c__TM7-3;o__I025;f__":0.0,"k__Bacteria;p__Tenericutes;c__Mollicutes;o__;f__":12.0,"k__Bacteria;p__Tenericutes;c__Mollicutes;o__Acholeplasmatales;f__Acholeplasmataceae":0.0,"k__Bacteria;p__Tenericutes;c__Mollicutes;o__RF39;f__":0.0,"k__Bacteria;p__Tenericutes;c__RF3;o__ML615J-28;f__":371.0,"k__Bacteria;p__Thermotogae;c__Thermotogae;o__Thermotogales;f__Thermotogaceae":0.0,"k__Bacteria;p__Verrucomicrobia;c__Verruco-5;o__LD1-PB3;f__":0.0,"k__Bacteria;p__Verrucomicrobia;c__[Pedosphaerae];o__[Pedosphaerales];f__R4-41B":0.0,"k__Bacteria;p__WPS-2;c__;o__;f__":0.0,"k__Bacteria;p__WS6;c__SC72;o__A-2AF;f__":0.0,"k__Bacteria;p__WS6;c__SC72;o__WCHB1-15;f__":0.0,"k__Bacteria;p__WWE1;c__[Cloacamonae];o__[Cloacamonales];f__":0.0,"k__Bacteria;p__WWE1;c__[Cloacamonae];o__[Cloacamonales];f__CW-1":0.0,"k__Bacteria;p__WWE1;c__[Cloacamonae];o__[Cloacamonales];f__[Cloacamonaceae]":0.0,"plant type":"Biogas","plant no.":"#12"},{"index":"13_U341F-U806R-NW3-15","k__Archaea;p__Crenarchaeota;c__MCG;o__pGrfC26;f__":0.0,"k__Archaea;p__Euryarchaeota;c__Methanobacteria;o__Methanobacteriales;f__Methanobacteriaceae":10.0,"k__Archaea;p__Euryarchaeota;c__Methanobacteria;o__Methanobacteriales;f__WSA2":0.0,"k__Archaea;p__Euryarchaeota;c__Methanomicrobia;o__Methanomicrobiales;f__Methanomicrobiaceae":24.0,"k__Archaea;p__Euryarchaeota;c__Methanomicrobia;o__Methanomicrobiales;f__Methanoregulaceae":0.0,"k__Archaea;p__Euryarchaeota;c__Methanomicrobia;o__Methanomicrobiales;f__Methanospirillaceae":0.0,"k__Archaea;p__Euryarchaeota;c__Methanomicrobia;o__Methanosarcinales;f__Methanosaetaceae":0.0,"k__Archaea;p__Euryarchaeota;c__Methanomicrobia;o__Methanosarcinales;f__Methanosarcinaceae":583.0,"k__Archaea;p__Euryarchaeota;c__Thermoplasmata;o__E2;f__[Methanomassiliicoccaceae]":4.0,"k__Archaea;p__[Parvarchaeota];c__[Parvarchaea];o__WCHD3-30;f__":0.0,"k__Bacteria;__;__;__;__":34.0,"k__Bacteria;p__;c__;o__;f__":451.0,"k__Bacteria;p__Acidobacteria;c__BPC102;o__MVS-40;f__":0.0,"k__Bacteria;p__Acidobacteria;c__Solibacteres;o__Solibacterales;f__AKIW659":0.0,"k__Bacteria;p__Acidobacteria;c__[Chloracidobacteria];o__RB41;f__Ellin6075":0.0,"k__Bacteria;p__Actinobacteria;c__;o__;f__":0.0,"k__Bacteria;p__Actinobacteria;c__Acidimicrobiia;o__Acidimicrobiales;f__":0.0,"k__Bacteria;p__Actinobacteria;c__Acidimicrobiia;o__Acidimicrobiales;f__C111":0.0,"k__Bacteria;p__Actinobacteria;c__Acidimicrobiia;o__Acidimicrobiales;f__Microthrixaceae":0.0,"k__Bacteria;p__Actinobacteria;c__Actinobacteria;o__Actinomycetales;__":0.0,"k__Bacteria;p__Actinobacteria;c__Actinobacteria;o__Actinomycetales;f__Corynebacteriaceae":0.0,"k__Bacteria;p__Actinobacteria;c__Actinobacteria;o__Actinomycetales;f__Dermatophilaceae":0.0,"k__Bacteria;p__Actinobacteria;c__Actinobacteria;o__Actinomycetales;f__Intrasporangiaceae":0.0,"k__Bacteria;p__Actinobacteria;c__Actinobacteria;o__Actinomycetales;f__Microbacteriaceae":0.0,"k__Bacteria;p__Actinobacteria;c__Actinobacteria;o__Actinomycetales;f__Nocardioidaceae":0.0,"k__Bacteria;p__Actinobacteria;c__Actinobacteria;o__Actinomycetales;f__Nocardiopsaceae":17.0,"k__Bacteria;p__Actinobacteria;c__Actinobacteria;o__Actinomycetales;f__Pseudonocardiaceae":18.0,"k__Bacteria;p__Actinobacteria;c__Actinobacteria;o__Actinomycetales;f__Streptomycetaceae":0.0,"k__Bacteria;p__Actinobacteria;c__Actinobacteria;o__Bifidobacteriales;f__Bifidobacteriaceae":0.0,"k__Bacteria;p__Actinobacteria;c__Actinobacteria;o__WCHB1-81;f__At425_EubF1":0.0,"k__Bacteria;p__Actinobacteria;c__Coriobacteriia;o__Coriobacteriales;f__Coriobacteriaceae":0.0,"k__Bacteria;p__Armatimonadetes;c__SJA-176;o__GAB-B06;f__":0.0,"k__Bacteria;p__Bacteroidetes;__;__;__":822.0,"k__Bacteria;p__Bacteroidetes;c__Bacteroidia;o__Bacteroidales;__":311.0,"k__Bacteria;p__Bacteroidetes;c__Bacteroidia;o__Bacteroidales;f__":394.0,"k__Bacteria;p__Bacteroidetes;c__Bacteroidia;o__Bacteroidales;f__Bacteroidaceae":76.0,"k__Bacteria;p__Bacteroidetes;c__Bacteroidia;o__Bacteroidales;f__Marinilabiaceae":0.0,"k__Bacteria;p__Bacteroidetes;c__Bacteroidia;o__Bacteroidales;f__Porphyromonadaceae":70.0,"k__Bacteria;p__Bacteroidetes;c__Bacteroidia;o__Bacteroidales;f__Prevotellaceae":0.0,"k__Bacteria;p__Bacteroidetes;c__Bacteroidia;o__Bacteroidales;f__Rikenellaceae":0.0,"k__Bacteria;p__Bacteroidetes;c__Flavobacteriia;o__Flavobacteriales;f__Flavobacteriaceae":0.0,"k__Bacteria;p__Bacteroidetes;c__Sphingobacteriia;o__Sphingobacteriales;f__Sphingobacteriaceae":0.0,"k__Bacteria;p__Bacteroidetes;c__[Saprospirae];o__[Saprospirales];f__Chitinophagaceae":0.0,"k__Bacteria;p__Bacteroidetes;c__[Saprospirae];o__[Saprospirales];f__Saprospiraceae":0.0,"k__Bacteria;p__Caldiserica;c__OP5;o__WCHB1-02;f__SHBZ1169":0.0,"k__Bacteria;p__Caldiserica;c__TTA-B1;o__;f__":0.0,"k__Bacteria;p__Chlorobi;c__Ignavibacteria;o__Ignavibacteriales;f__Ignavibacteriaceae":0.0,"k__Bacteria;p__Chlorobi;c__SJA-28;o__;f__":0.0,"k__Bacteria;p__Chloroflexi;c__;o__;f__":0.0,"k__Bacteria;p__Chloroflexi;c__Anaerolineae;o__Anaerolineales;f__Anaerolinaceae":0.0,"k__Bacteria;p__Chloroflexi;c__Anaerolineae;o__Caldilineales;f__Caldilineaceae":0.0,"k__Bacteria;p__Chloroflexi;c__Anaerolineae;o__OPB11;f__":0.0,"k__Bacteria;p__Chloroflexi;c__Anaerolineae;o__SBR1031;f__SHA-31":0.0,"k__Bacteria;p__Chloroflexi;c__Anaerolineae;o__SHA-20;f__":0.0,"k__Bacteria;p__Chloroflexi;c__Dehalococcoidetes;o__Dehalococcoidales;__":0.0,"k__Bacteria;p__Chloroflexi;c__Ellin6529;o__;f__":0.0,"k__Bacteria;p__Chloroflexi;c__TK17;o__mle1-48;f__":0.0,"k__Bacteria;p__Chloroflexi;c__Thermomicrobia;o__JG30-KF-CM45;f__":0.0,"k__Bacteria;p__Cyanobacteria;c__Chloroplast;o__Streptophyta;f__":0.0,"k__Bacteria;p__EM3;c__;o__;f__":0.0,"k__Bacteria;p__Fibrobacteres;c__Fibrobacteria;o__Fibrobacterales;f__":0.0,"k__Bacteria;p__Fibrobacteres;c__Fibrobacteria;o__Fibrobacterales;f__Fibrobacteraceae":0.0,"k__Bacteria;p__Fibrobacteres;c__TG3;o__TG3-1;f__TSCOR003-O20":0.0,"k__Bacteria;p__Firmicutes;c__Bacilli;__;__":0.0,"k__Bacteria;p__Firmicutes;c__Bacilli;o__Bacillales;__":0.0,"k__Bacteria;p__Firmicutes;c__Bacilli;o__Bacillales;f__Bacillaceae":83.0,"k__Bacteria;p__Firmicutes;c__Bacilli;o__Bacillales;f__Paenibacillaceae":24.0,"k__Bacteria;p__Firmicutes;c__Bacilli;o__Bacillales;f__Planococcaceae":0.0,"k__Bacteria;p__Firmicutes;c__Bacilli;o__Bacillales;f__Staphylococcaceae":0.0,"k__Bacteria;p__Firmicutes;c__Bacilli;o__Bacillales;f__Thermoactinomycetaceae":60.0,"k__Bacteria;p__Firmicutes;c__Bacilli;o__Haloplasmatales;f__Haloplasmataceae":0.0,"k__Bacteria;p__Firmicutes;c__Bacilli;o__Lactobacillales;f__Aerococcaceae":0.0,"k__Bacteria;p__Firmicutes;c__Bacilli;o__Lactobacillales;f__Carnobacteriaceae":0.0,"k__Bacteria;p__Firmicutes;c__Bacilli;o__Lactobacillales;f__Enterococcaceae":0.0,"k__Bacteria;p__Firmicutes;c__Bacilli;o__Lactobacillales;f__Lactobacillaceae":119.0,"k__Bacteria;p__Firmicutes;c__Bacilli;o__Lactobacillales;f__Leuconostocaceae":81.0,"k__Bacteria;p__Firmicutes;c__Bacilli;o__Lactobacillales;f__Streptococcaceae":118.0,"k__Bacteria;p__Firmicutes;c__Bacilli;o__Turicibacterales;f__Turicibacteraceae":22.0,"k__Bacteria;p__Firmicutes;c__Clostridia;__;__":482.0,"k__Bacteria;p__Firmicutes;c__Clostridia;o__;f__":21.0,"k__Bacteria;p__Firmicutes;c__Clostridia;o__BSA2B-08;f__":44.0,"k__Bacteria;p__Firmicutes;c__Clostridia;o__Clostridiales;__":82.0,"k__Bacteria;p__Firmicutes;c__Clostridia;o__Clostridiales;f__":128.0,"k__Bacteria;p__Firmicutes;c__Clostridia;o__Clostridiales;f__Caldicoprobacteraceae":586.0,"k__Bacteria;p__Firmicutes;c__Clostridia;o__Clostridiales;f__Christensenellaceae":0.0,"k__Bacteria;p__Firmicutes;c__Clostridia;o__Clostridiales;f__Clostridiaceae":582.0,"k__Bacteria;p__Firmicutes;c__Clostridia;o__Clostridiales;f__Dehalobacteriaceae":4.0,"k__Bacteria;p__Firmicutes;c__Clostridia;o__Clostridiales;f__EtOH8":0.0,"k__Bacteria;p__Firmicutes;c__Clostridia;o__Clostridiales;f__Eubacteriaceae":39.0,"k__Bacteria;p__Firmicutes;c__Clostridia;o__Clostridiales;f__Gracilibacteraceae":10.0,"k__Bacteria;p__Firmicutes;c__Clostridia;o__Clostridiales;f__Lachnospiraceae":41.0,"k__Bacteria;p__Firmicutes;c__Clostridia;o__Clostridiales;f__Peptococcaceae":42.0,"k__Bacteria;p__Firmicutes;c__Clostridia;o__Clostridiales;f__Peptostreptococcaceae":47.0,"k__Bacteria;p__Firmicutes;c__Clostridia;o__Clostridiales;f__Ruminococcaceae":436.0,"k__Bacteria;p__Firmicutes;c__Clostridia;o__Clostridiales;f__Syntrophomonadaceae":50.0,"k__Bacteria;p__Firmicutes;c__Clostridia;o__Clostridiales;f__Veillonellaceae":0.0,"k__Bacteria;p__Firmicutes;c__Clostridia;o__Clostridiales;f__[Mogibacteriaceae]":73.0,"k__Bacteria;p__Firmicutes;c__Clostridia;o__Clostridiales;f__[Tissierellaceae]":336.0,"k__Bacteria;p__Firmicutes;c__Clostridia;o__Halanaerobiales;f__Halanaerobiaceae":167.0,"k__Bacteria;p__Firmicutes;c__Clostridia;o__MBA08;f__":4134.0,"k__Bacteria;p__Firmicutes;c__Clostridia;o__Natranaerobiales;f__":79.0,"k__Bacteria;p__Firmicutes;c__Clostridia;o__Natranaerobiales;f__Anaerobrancaceae":151.0,"k__Bacteria;p__Firmicutes;c__Clostridia;o__Natranaerobiales;f__ML1228J-1":47.0,"k__Bacteria;p__Firmicutes;c__Clostridia;o__Natranaerobiales;f__YAB3B13":14.0,"k__Bacteria;p__Firmicutes;c__Clostridia;o__OPB54;f__":57.0,"k__Bacteria;p__Firmicutes;c__Clostridia;o__SHA-98;f__":790.0,"k__Bacteria;p__Firmicutes;c__Clostridia;o__SHA-98;f__D2":114.0,"k__Bacteria;p__Firmicutes;c__Clostridia;o__Thermoanaerobacterales;f__":110.0,"k__Bacteria;p__Firmicutes;c__Clostridia;o__Thermoanaerobacterales;f__Thermoanaerobacteraceae":159.0,"k__Bacteria;p__Firmicutes;c__Clostridia;o__Thermoanaerobacterales;f__Thermodesulfobiaceae":0.0,"k__Bacteria;p__Firmicutes;c__Erysipelotrichi;o__Erysipelotrichales;f__Erysipelotrichaceae":19.0,"k__Bacteria;p__Firmicutes;c__OPB54;o__;f__":104.0,"k__Bacteria;p__NKB19;c__noFP_H4;o__;f__":0.0,"k__Bacteria;p__OD1;c__;o__;f__":0.0,"k__Bacteria;p__OD1;c__ABY1;o__;f__":0.0,"k__Bacteria;p__OP1;c__OPB14;o__;f__":0.0,"k__Bacteria;p__OP8;c__OP8_1;o__OPB95;f__":0.0,"k__Bacteria;p__OP9;c__JS1;o__BA021;f__":0.0,"k__Bacteria;p__OP9;c__OPB46;o__OPB72;f__TIBD11":65.0,"k__Bacteria;p__OP9;c__OPB46;o__SHA-1;f__":9.0,"k__Bacteria;p__Proteobacteria;c__Alphaproteobacteria;__;__":0.0,"k__Bacteria;p__Proteobacteria;c__Alphaproteobacteria;o__Rhizobiales;f__Hyphomicrobiaceae":0.0,"k__Bacteria;p__Proteobacteria;c__Alphaproteobacteria;o__Rhizobiales;f__Methylobacteriaceae":0.0,"k__Bacteria;p__Proteobacteria;c__Alphaproteobacteria;o__Rhizobiales;f__Methylocystaceae":0.0,"k__Bacteria;p__Proteobacteria;c__Alphaproteobacteria;o__Rhodobacterales;f__Rhodobacteraceae":0.0,"k__Bacteria;p__Proteobacteria;c__Alphaproteobacteria;o__Rhodospirillales;f__Rhodospirillaceae":0.0,"k__Bacteria;p__Proteobacteria;c__Alphaproteobacteria;o__Sphingomonadales;__":0.0,"k__Bacteria;p__Proteobacteria;c__Betaproteobacteria;__;__":0.0,"k__Bacteria;p__Proteobacteria;c__Betaproteobacteria;o__Burkholderiales;f__Alcaligenaceae":0.0,"k__Bacteria;p__Proteobacteria;c__Betaproteobacteria;o__Burkholderiales;f__Burkholderiaceae":0.0,"k__Bacteria;p__Proteobacteria;c__Betaproteobacteria;o__Burkholderiales;f__Comamonadaceae":0.0,"k__Bacteria;p__Proteobacteria;c__Betaproteobacteria;o__Thiobacterales;f__Thiobacteraceae":0.0,"k__Bacteria;p__Proteobacteria;c__Deltaproteobacteria;__;__":0.0,"k__Bacteria;p__Proteobacteria;c__Deltaproteobacteria;o__;f__":0.0,"k__Bacteria;p__Proteobacteria;c__Deltaproteobacteria;o__Syntrophobacterales;f__Syntrophaceae":0.0,"k__Bacteria;p__Proteobacteria;c__Deltaproteobacteria;o__Syntrophobacterales;f__Syntrophorhabdaceae":0.0,"k__Bacteria;p__Proteobacteria;c__Epsilonproteobacteria;o__Campylobacterales;f__Campylobacteraceae":0.0,"k__Bacteria;p__Proteobacteria;c__Gammaproteobacteria;__;__":0.0,"k__Bacteria;p__Proteobacteria;c__Gammaproteobacteria;o__Aeromonadales;f__Aeromonadaceae":0.0,"k__Bacteria;p__Proteobacteria;c__Gammaproteobacteria;o__Aeromonadales;f__Succinivibrionaceae":0.0,"k__Bacteria;p__Proteobacteria;c__Gammaproteobacteria;o__Pseudomonadales;f__Moraxellaceae":0.0,"k__Bacteria;p__Proteobacteria;c__Gammaproteobacteria;o__Pseudomonadales;f__Pseudomonadaceae":0.0,"k__Bacteria;p__Proteobacteria;c__Gammaproteobacteria;o__Xanthomonadales;f__Xanthomonadaceae":0.0,"k__Bacteria;p__SAR406;c__AB16;o__noFP_H7;f__":0.0,"k__Bacteria;p__SR1;c__;o__;f__":0.0,"k__Bacteria;p__Spirochaetes;c__MVP-15;o__PL-11B10;f__":0.0,"k__Bacteria;p__Spirochaetes;c__Spirochaetes;o__Sphaerochaetales;f__Sphaerochaetaceae":0.0,"k__Bacteria;p__Spirochaetes;c__Spirochaetes;o__Spirochaetales;f__Spirochaetaceae":5.0,"k__Bacteria;p__Spirochaetes;c__[Leptospirae];o__[Leptospirales];f__Sediment-4":0.0,"k__Bacteria;p__Synergistetes;c__Synergistia;o__Synergistales;f__":0.0,"k__Bacteria;p__Synergistetes;c__Synergistia;o__Synergistales;f__Anaerobaculaceae":70.0,"k__Bacteria;p__Synergistetes;c__Synergistia;o__Synergistales;f__Dethiosulfovibrionaceae":0.0,"k__Bacteria;p__Synergistetes;c__Synergistia;o__Synergistales;f__Synergistaceae":0.0,"k__Bacteria;p__Synergistetes;c__Synergistia;o__Synergistales;f__Thermovirgaceae":0.0,"k__Bacteria;p__TA06;c__;o__;f__":0.0,"k__Bacteria;p__TM7;c__TM7-1;o__;f__":0.0,"k__Bacteria;p__TM7;c__TM7-3;__;__":0.0,"k__Bacteria;p__TM7;c__TM7-3;o__;f__":0.0,"k__Bacteria;p__TM7;c__TM7-3;o__CW040;f__F16":0.0,"k__Bacteria;p__TM7;c__TM7-3;o__I025;f__":0.0,"k__Bacteria;p__Tenericutes;c__Mollicutes;o__;f__":0.0,"k__Bacteria;p__Tenericutes;c__Mollicutes;o__Acholeplasmatales;f__Acholeplasmataceae":90.0,"k__Bacteria;p__Tenericutes;c__Mollicutes;o__RF39;f__":0.0,"k__Bacteria;p__Tenericutes;c__RF3;o__ML615J-28;f__":211.0,"k__Bacteria;p__Thermotogae;c__Thermotogae;o__Thermotogales;f__Thermotogaceae":0.0,"k__Bacteria;p__Verrucomicrobia;c__Verruco-5;o__LD1-PB3;f__":0.0,"k__Bacteria;p__Verrucomicrobia;c__[Pedosphaerae];o__[Pedosphaerales];f__R4-41B":0.0,"k__Bacteria;p__WPS-2;c__;o__;f__":0.0,"k__Bacteria;p__WS6;c__SC72;o__A-2AF;f__":2.0,"k__Bacteria;p__WS6;c__SC72;o__WCHB1-15;f__":0.0,"k__Bacteria;p__WWE1;c__[Cloacamonae];o__[Cloacamonales];f__":0.0,"k__Bacteria;p__WWE1;c__[Cloacamonae];o__[Cloacamonales];f__CW-1":0.0,"k__Bacteria;p__WWE1;c__[Cloacamonae];o__[Cloacamonales];f__[Cloacamonaceae]":8.0,"plant type":"Biogas","plant no.":"#13"},{"index":"14_U341F-U806R-NW3-7","k__Archaea;p__Crenarchaeota;c__MCG;o__pGrfC26;f__":0.0,"k__Archaea;p__Euryarchaeota;c__Methanobacteria;o__Methanobacteriales;f__Methanobacteriaceae":0.0,"k__Archaea;p__Euryarchaeota;c__Methanobacteria;o__Methanobacteriales;f__WSA2":13.0,"k__Archaea;p__Euryarchaeota;c__Methanomicrobia;o__Methanomicrobiales;f__Methanomicrobiaceae":0.0,"k__Archaea;p__Euryarchaeota;c__Methanomicrobia;o__Methanomicrobiales;f__Methanoregulaceae":69.0,"k__Archaea;p__Euryarchaeota;c__Methanomicrobia;o__Methanomicrobiales;f__Methanospirillaceae":25.0,"k__Archaea;p__Euryarchaeota;c__Methanomicrobia;o__Methanosarcinales;f__Methanosaetaceae":697.0,"k__Archaea;p__Euryarchaeota;c__Methanomicrobia;o__Methanosarcinales;f__Methanosarcinaceae":0.0,"k__Archaea;p__Euryarchaeota;c__Thermoplasmata;o__E2;f__[Methanomassiliicoccaceae]":0.0,"k__Archaea;p__[Parvarchaeota];c__[Parvarchaea];o__WCHD3-30;f__":0.0,"k__Bacteria;__;__;__;__":224.0,"k__Bacteria;p__;c__;o__;f__":905.0,"k__Bacteria;p__Acidobacteria;c__BPC102;o__MVS-40;f__":10.0,"k__Bacteria;p__Acidobacteria;c__Solibacteres;o__Solibacterales;f__AKIW659":9.0,"k__Bacteria;p__Acidobacteria;c__[Chloracidobacteria];o__RB41;f__Ellin6075":0.0,"k__Bacteria;p__Actinobacteria;c__;o__;f__":16.0,"k__Bacteria;p__Actinobacteria;c__Acidimicrobiia;o__Acidimicrobiales;f__":24.0,"k__Bacteria;p__Actinobacteria;c__Acidimicrobiia;o__Acidimicrobiales;f__C111":78.0,"k__Bacteria;p__Actinobacteria;c__Acidimicrobiia;o__Acidimicrobiales;f__Microthrixaceae":10.0,"k__Bacteria;p__Actinobacteria;c__Actinobacteria;o__Actinomycetales;__":23.0,"k__Bacteria;p__Actinobacteria;c__Actinobacteria;o__Actinomycetales;f__Corynebacteriaceae":0.0,"k__Bacteria;p__Actinobacteria;c__Actinobacteria;o__Actinomycetales;f__Dermatophilaceae":0.0,"k__Bacteria;p__Actinobacteria;c__Actinobacteria;o__Actinomycetales;f__Intrasporangiaceae":164.0,"k__Bacteria;p__Actinobacteria;c__Actinobacteria;o__Actinomycetales;f__Microbacteriaceae":10.0,"k__Bacteria;p__Actinobacteria;c__Actinobacteria;o__Actinomycetales;f__Nocardioidaceae":0.0,"k__Bacteria;p__Actinobacteria;c__Actinobacteria;o__Actinomycetales;f__Nocardiopsaceae":0.0,"k__Bacteria;p__Actinobacteria;c__Actinobacteria;o__Actinomycetales;f__Pseudonocardiaceae":0.0,"k__Bacteria;p__Actinobacteria;c__Actinobacteria;o__Actinomycetales;f__Streptomycetaceae":11.0,"k__Bacteria;p__Actinobacteria;c__Actinobacteria;o__Bifidobacteriales;f__Bifidobacteriaceae":0.0,"k__Bacteria;p__Actinobacteria;c__Actinobacteria;o__WCHB1-81;f__At425_EubF1":15.0,"k__Bacteria;p__Actinobacteria;c__Coriobacteriia;o__Coriobacteriales;f__Coriobacteriaceae":0.0,"k__Bacteria;p__Armatimonadetes;c__SJA-176;o__GAB-B06;f__":8.0,"k__Bacteria;p__Bacteroidetes;__;__;__":8.0,"k__Bacteria;p__Bacteroidetes;c__Bacteroidia;o__Bacteroidales;__":66.0,"k__Bacteria;p__Bacteroidetes;c__Bacteroidia;o__Bacteroidales;f__":1772.0,"k__Bacteria;p__Bacteroidetes;c__Bacteroidia;o__Bacteroidales;f__Bacteroidaceae":0.0,"k__Bacteria;p__Bacteroidetes;c__Bacteroidia;o__Bacteroidales;f__Marinilabiaceae":10.0,"k__Bacteria;p__Bacteroidetes;c__Bacteroidia;o__Bacteroidales;f__Porphyromonadaceae":250.0,"k__Bacteria;p__Bacteroidetes;c__Bacteroidia;o__Bacteroidales;f__Prevotellaceae":0.0,"k__Bacteria;p__Bacteroidetes;c__Bacteroidia;o__Bacteroidales;f__Rikenellaceae":348.0,"k__Bacteria;p__Bacteroidetes;c__Flavobacteriia;o__Flavobacteriales;f__Flavobacteriaceae":0.0,"k__Bacteria;p__Bacteroidetes;c__Sphingobacteriia;o__Sphingobacteriales;f__Sphingobacteriaceae":0.0,"k__Bacteria;p__Bacteroidetes;c__[Saprospirae];o__[Saprospirales];f__Chitinophagaceae":16.0,"k__Bacteria;p__Bacteroidetes;c__[Saprospirae];o__[Saprospirales];f__Saprospiraceae":17.0,"k__Bacteria;p__Caldiserica;c__OP5;o__WCHB1-02;f__SHBZ1169":17.0,"k__Bacteria;p__Caldiserica;c__TTA-B1;o__;f__":14.0,"k__Bacteria;p__Chlorobi;c__Ignavibacteria;o__Ignavibacteriales;f__Ignavibacteriaceae":0.0,"k__Bacteria;p__Chlorobi;c__SJA-28;o__;f__":16.0,"k__Bacteria;p__Chloroflexi;c__;o__;f__":6.0,"k__Bacteria;p__Chloroflexi;c__Anaerolineae;o__Anaerolineales;f__Anaerolinaceae":227.0,"k__Bacteria;p__Chloroflexi;c__Anaerolineae;o__Caldilineales;f__Caldilineaceae":35.0,"k__Bacteria;p__Chloroflexi;c__Anaerolineae;o__OPB11;f__":15.0,"k__Bacteria;p__Chloroflexi;c__Anaerolineae;o__SBR1031;f__SHA-31":8.0,"k__Bacteria;p__Chloroflexi;c__Anaerolineae;o__SHA-20;f__":147.0,"k__Bacteria;p__Chloroflexi;c__Dehalococcoidetes;o__Dehalococcoidales;__":0.0,"k__Bacteria;p__Chloroflexi;c__Ellin6529;o__;f__":3.0,"k__Bacteria;p__Chloroflexi;c__TK17;o__mle1-48;f__":0.0,"k__Bacteria;p__Chloroflexi;c__Thermomicrobia;o__JG30-KF-CM45;f__":0.0,"k__Bacteria;p__Cyanobacteria;c__Chloroplast;o__Streptophyta;f__":0.0,"k__Bacteria;p__EM3;c__;o__;f__":793.0,"k__Bacteria;p__Fibrobacteres;c__Fibrobacteria;o__Fibrobacterales;f__":0.0,"k__Bacteria;p__Fibrobacteres;c__Fibrobacteria;o__Fibrobacterales;f__Fibrobacteraceae":0.0,"k__Bacteria;p__Fibrobacteres;c__TG3;o__TG3-1;f__TSCOR003-O20":0.0,"k__Bacteria;p__Firmicutes;c__Bacilli;__;__":0.0,"k__Bacteria;p__Firmicutes;c__Bacilli;o__Bacillales;__":0.0,"k__Bacteria;p__Firmicutes;c__Bacilli;o__Bacillales;f__Bacillaceae":0.0,"k__Bacteria;p__Firmicutes;c__Bacilli;o__Bacillales;f__Paenibacillaceae":0.0,"k__Bacteria;p__Firmicutes;c__Bacilli;o__Bacillales;f__Planococcaceae":0.0,"k__Bacteria;p__Firmicutes;c__Bacilli;o__Bacillales;f__Staphylococcaceae":0.0,"k__Bacteria;p__Firmicutes;c__Bacilli;o__Bacillales;f__Thermoactinomycetaceae":0.0,"k__Bacteria;p__Firmicutes;c__Bacilli;o__Haloplasmatales;f__Haloplasmataceae":0.0,"k__Bacteria;p__Firmicutes;c__Bacilli;o__Lactobacillales;f__Aerococcaceae":0.0,"k__Bacteria;p__Firmicutes;c__Bacilli;o__Lactobacillales;f__Carnobacteriaceae":12.0,"k__Bacteria;p__Firmicutes;c__Bacilli;o__Lactobacillales;f__Enterococcaceae":0.0,"k__Bacteria;p__Firmicutes;c__Bacilli;o__Lactobacillales;f__Lactobacillaceae":0.0,"k__Bacteria;p__Firmicutes;c__Bacilli;o__Lactobacillales;f__Leuconostocaceae":0.0,"k__Bacteria;p__Firmicutes;c__Bacilli;o__Lactobacillales;f__Streptococcaceae":33.0,"k__Bacteria;p__Firmicutes;c__Bacilli;o__Turicibacterales;f__Turicibacteraceae":12.0,"k__Bacteria;p__Firmicutes;c__Clostridia;__;__":10.0,"k__Bacteria;p__Firmicutes;c__Clostridia;o__;f__":4.0,"k__Bacteria;p__Firmicutes;c__Clostridia;o__BSA2B-08;f__":0.0,"k__Bacteria;p__Firmicutes;c__Clostridia;o__Clostridiales;__":131.0,"k__Bacteria;p__Firmicutes;c__Clostridia;o__Clostridiales;f__":116.0,"k__Bacteria;p__Firmicutes;c__Clostridia;o__Clostridiales;f__Caldicoprobacteraceae":9.0,"k__Bacteria;p__Firmicutes;c__Clostridia;o__Clostridiales;f__Christensenellaceae":7.0,"k__Bacteria;p__Firmicutes;c__Clostridia;o__Clostridiales;f__Clostridiaceae":141.0,"k__Bacteria;p__Firmicutes;c__Clostridia;o__Clostridiales;f__Dehalobacteriaceae":0.0,"k__Bacteria;p__Firmicutes;c__Clostridia;o__Clostridiales;f__EtOH8":5.0,"k__Bacteria;p__Firmicutes;c__Clostridia;o__Clostridiales;f__Eubacteriaceae":0.0,"k__Bacteria;p__Firmicutes;c__Clostridia;o__Clostridiales;f__Gracilibacteraceae":168.0,"k__Bacteria;p__Firmicutes;c__Clostridia;o__Clostridiales;f__Lachnospiraceae":0.0,"k__Bacteria;p__Firmicutes;c__Clostridia;o__Clostridiales;f__Peptococcaceae":12.0,"k__Bacteria;p__Firmicutes;c__Clostridia;o__Clostridiales;f__Peptostreptococcaceae":84.0,"k__Bacteria;p__Firmicutes;c__Clostridia;o__Clostridiales;f__Ruminococcaceae":210.0,"k__Bacteria;p__Firmicutes;c__Clostridia;o__Clostridiales;f__Syntrophomonadaceae":30.0,"k__Bacteria;p__Firmicutes;c__Clostridia;o__Clostridiales;f__Veillonellaceae":11.0,"k__Bacteria;p__Firmicutes;c__Clostridia;o__Clostridiales;f__[Mogibacteriaceae]":57.0,"k__Bacteria;p__Firmicutes;c__Clostridia;o__Clostridiales;f__[Tissierellaceae]":1933.0,"k__Bacteria;p__Firmicutes;c__Clostridia;o__Halanaerobiales;f__Halanaerobiaceae":0.0,"k__Bacteria;p__Firmicutes;c__Clostridia;o__MBA08;f__":63.0,"k__Bacteria;p__Firmicutes;c__Clostridia;o__Natranaerobiales;f__":0.0,"k__Bacteria;p__Firmicutes;c__Clostridia;o__Natranaerobiales;f__Anaerobrancaceae":0.0,"k__Bacteria;p__Firmicutes;c__Clostridia;o__Natranaerobiales;f__ML1228J-1":12.0,"k__Bacteria;p__Firmicutes;c__Clostridia;o__Natranaerobiales;f__YAB3B13":0.0,"k__Bacteria;p__Firmicutes;c__Clostridia;o__OPB54;f__":4.0,"k__Bacteria;p__Firmicutes;c__Clostridia;o__SHA-98;f__":498.0,"k__Bacteria;p__Firmicutes;c__Clostridia;o__SHA-98;f__D2":500.0,"k__Bacteria;p__Firmicutes;c__Clostridia;o__Thermoanaerobacterales;f__":0.0,"k__Bacteria;p__Firmicutes;c__Clostridia;o__Thermoanaerobacterales;f__Thermoanaerobacteraceae":0.0,"k__Bacteria;p__Firmicutes;c__Clostridia;o__Thermoanaerobacterales;f__Thermodesulfobiaceae":13.0,"k__Bacteria;p__Firmicutes;c__Erysipelotrichi;o__Erysipelotrichales;f__Erysipelotrichaceae":0.0,"k__Bacteria;p__Firmicutes;c__OPB54;o__;f__":0.0,"k__Bacteria;p__NKB19;c__noFP_H4;o__;f__":0.0,"k__Bacteria;p__OD1;c__;o__;f__":313.0,"k__Bacteria;p__OD1;c__ABY1;o__;f__":0.0,"k__Bacteria;p__OP1;c__OPB14;o__;f__":20.0,"k__Bacteria;p__OP8;c__OP8_1;o__OPB95;f__":304.0,"k__Bacteria;p__OP9;c__JS1;o__BA021;f__":5.0,"k__Bacteria;p__OP9;c__OPB46;o__OPB72;f__TIBD11":50.0,"k__Bacteria;p__OP9;c__OPB46;o__SHA-1;f__":30.0,"k__Bacteria;p__Proteobacteria;c__Alphaproteobacteria;__;__":0.0,"k__Bacteria;p__Proteobacteria;c__Alphaproteobacteria;o__Rhizobiales;f__Hyphomicrobiaceae":0.0,"k__Bacteria;p__Proteobacteria;c__Alphaproteobacteria;o__Rhizobiales;f__Methylobacteriaceae":0.0,"k__Bacteria;p__Proteobacteria;c__Alphaproteobacteria;o__Rhizobiales;f__Methylocystaceae":0.0,"k__Bacteria;p__Proteobacteria;c__Alphaproteobacteria;o__Rhodobacterales;f__Rhodobacteraceae":0.0,"k__Bacteria;p__Proteobacteria;c__Alphaproteobacteria;o__Rhodospirillales;f__Rhodospirillaceae":8.0,"k__Bacteria;p__Proteobacteria;c__Alphaproteobacteria;o__Sphingomonadales;__":15.0,"k__Bacteria;p__Proteobacteria;c__Betaproteobacteria;__;__":31.0,"k__Bacteria;p__Proteobacteria;c__Betaproteobacteria;o__Burkholderiales;f__Alcaligenaceae":0.0,"k__Bacteria;p__Proteobacteria;c__Betaproteobacteria;o__Burkholderiales;f__Burkholderiaceae":0.0,"k__Bacteria;p__Proteobacteria;c__Betaproteobacteria;o__Burkholderiales;f__Comamonadaceae":74.0,"k__Bacteria;p__Proteobacteria;c__Betaproteobacteria;o__Thiobacterales;f__Thiobacteraceae":15.0,"k__Bacteria;p__Proteobacteria;c__Deltaproteobacteria;__;__":0.0,"k__Bacteria;p__Proteobacteria;c__Deltaproteobacteria;o__;f__":15.0,"k__Bacteria;p__Proteobacteria;c__Deltaproteobacteria;o__Syntrophobacterales;f__Syntrophaceae":45.0,"k__Bacteria;p__Proteobacteria;c__Deltaproteobacteria;o__Syntrophobacterales;f__Syntrophorhabdaceae":37.0,"k__Bacteria;p__Proteobacteria;c__Epsilonproteobacteria;o__Campylobacterales;f__Campylobacteraceae":14.0,"k__Bacteria;p__Proteobacteria;c__Gammaproteobacteria;__;__":0.0,"k__Bacteria;p__Proteobacteria;c__Gammaproteobacteria;o__Aeromonadales;f__Aeromonadaceae":36.0,"k__Bacteria;p__Proteobacteria;c__Gammaproteobacteria;o__Aeromonadales;f__Succinivibrionaceae":0.0,"k__Bacteria;p__Proteobacteria;c__Gammaproteobacteria;o__Pseudomonadales;f__Moraxellaceae":12.0,"k__Bacteria;p__Proteobacteria;c__Gammaproteobacteria;o__Pseudomonadales;f__Pseudomonadaceae":0.0,"k__Bacteria;p__Proteobacteria;c__Gammaproteobacteria;o__Xanthomonadales;f__Xanthomonadaceae":55.0,"k__Bacteria;p__SAR406;c__AB16;o__noFP_H7;f__":8.0,"k__Bacteria;p__SR1;c__;o__;f__":0.0,"k__Bacteria;p__Spirochaetes;c__MVP-15;o__PL-11B10;f__":0.0,"k__Bacteria;p__Spirochaetes;c__Spirochaetes;o__Sphaerochaetales;f__Sphaerochaetaceae":0.0,"k__Bacteria;p__Spirochaetes;c__Spirochaetes;o__Spirochaetales;f__Spirochaetaceae":470.0,"k__Bacteria;p__Spirochaetes;c__[Leptospirae];o__[Leptospirales];f__Sediment-4":31.0,"k__Bacteria;p__Synergistetes;c__Synergistia;o__Synergistales;f__":0.0,"k__Bacteria;p__Synergistetes;c__Synergistia;o__Synergistales;f__Anaerobaculaceae":97.0,"k__Bacteria;p__Synergistetes;c__Synergistia;o__Synergistales;f__Dethiosulfovibrionaceae":0.0,"k__Bacteria;p__Synergistetes;c__Synergistia;o__Synergistales;f__Synergistaceae":71.0,"k__Bacteria;p__Synergistetes;c__Synergistia;o__Synergistales;f__Thermovirgaceae":0.0,"k__Bacteria;p__TA06;c__;o__;f__":5.0,"k__Bacteria;p__TM7;c__TM7-1;o__;f__":31.0,"k__Bacteria;p__TM7;c__TM7-3;__;__":19.0,"k__Bacteria;p__TM7;c__TM7-3;o__;f__":61.0,"k__Bacteria;p__TM7;c__TM7-3;o__CW040;f__F16":0.0,"k__Bacteria;p__TM7;c__TM7-3;o__I025;f__":30.0,"k__Bacteria;p__Tenericutes;c__Mollicutes;o__;f__":0.0,"k__Bacteria;p__Tenericutes;c__Mollicutes;o__Acholeplasmatales;f__Acholeplasmataceae":0.0,"k__Bacteria;p__Tenericutes;c__Mollicutes;o__RF39;f__":0.0,"k__Bacteria;p__Tenericutes;c__RF3;o__ML615J-28;f__":4.0,"k__Bacteria;p__Thermotogae;c__Thermotogae;o__Thermotogales;f__Thermotogaceae":225.0,"k__Bacteria;p__Verrucomicrobia;c__Verruco-5;o__LD1-PB3;f__":0.0,"k__Bacteria;p__Verrucomicrobia;c__[Pedosphaerae];o__[Pedosphaerales];f__R4-41B":0.0,"k__Bacteria;p__WPS-2;c__;o__;f__":4.0,"k__Bacteria;p__WS6;c__SC72;o__A-2AF;f__":28.0,"k__Bacteria;p__WS6;c__SC72;o__WCHB1-15;f__":0.0,"k__Bacteria;p__WWE1;c__[Cloacamonae];o__[Cloacamonales];f__":0.0,"k__Bacteria;p__WWE1;c__[Cloacamonae];o__[Cloacamonales];f__CW-1":0.0,"k__Bacteria;p__WWE1;c__[Cloacamonae];o__[Cloacamonales];f__[Cloacamonaceae]":2349.0,"plant type":"SSD","plant no.":"#14"},{"index":"15_U341F-U806R-NW3-13","k__Archaea;p__Crenarchaeota;c__MCG;o__pGrfC26;f__":0.0,"k__Archaea;p__Euryarchaeota;c__Methanobacteria;o__Methanobacteriales;f__Methanobacteriaceae":0.0,"k__Archaea;p__Euryarchaeota;c__Methanobacteria;o__Methanobacteriales;f__WSA2":14.0,"k__Archaea;p__Euryarchaeota;c__Methanomicrobia;o__Methanomicrobiales;f__Methanomicrobiaceae":0.0,"k__Archaea;p__Euryarchaeota;c__Methanomicrobia;o__Methanomicrobiales;f__Methanoregulaceae":0.0,"k__Archaea;p__Euryarchaeota;c__Methanomicrobia;o__Methanomicrobiales;f__Methanospirillaceae":0.0,"k__Archaea;p__Euryarchaeota;c__Methanomicrobia;o__Methanosarcinales;f__Methanosaetaceae":294.0,"k__Archaea;p__Euryarchaeota;c__Methanomicrobia;o__Methanosarcinales;f__Methanosarcinaceae":0.0,"k__Archaea;p__Euryarchaeota;c__Thermoplasmata;o__E2;f__[Methanomassiliicoccaceae]":0.0,"k__Archaea;p__[Parvarchaeota];c__[Parvarchaea];o__WCHD3-30;f__":5.0,"k__Bacteria;__;__;__;__":0.0,"k__Bacteria;p__;c__;o__;f__":16.0,"k__Bacteria;p__Acidobacteria;c__BPC102;o__MVS-40;f__":0.0,"k__Bacteria;p__Acidobacteria;c__Solibacteres;o__Solibacterales;f__AKIW659":0.0,"k__Bacteria;p__Acidobacteria;c__[Chloracidobacteria];o__RB41;f__Ellin6075":14.0,"k__Bacteria;p__Actinobacteria;c__;o__;f__":0.0,"k__Bacteria;p__Actinobacteria;c__Acidimicrobiia;o__Acidimicrobiales;f__":0.0,"k__Bacteria;p__Actinobacteria;c__Acidimicrobiia;o__Acidimicrobiales;f__C111":16.0,"k__Bacteria;p__Actinobacteria;c__Acidimicrobiia;o__Acidimicrobiales;f__Microthrixaceae":94.0,"k__Bacteria;p__Actinobacteria;c__Actinobacteria;o__Actinomycetales;__":0.0,"k__Bacteria;p__Actinobacteria;c__Actinobacteria;o__Actinomycetales;f__Corynebacteriaceae":0.0,"k__Bacteria;p__Actinobacteria;c__Actinobacteria;o__Actinomycetales;f__Dermatophilaceae":153.0,"k__Bacteria;p__Actinobacteria;c__Actinobacteria;o__Actinomycetales;f__Intrasporangiaceae":703.0,"k__Bacteria;p__Actinobacteria;c__Actinobacteria;o__Actinomycetales;f__Microbacteriaceae":0.0,"k__Bacteria;p__Actinobacteria;c__Actinobacteria;o__Actinomycetales;f__Nocardioidaceae":32.0,"k__Bacteria;p__Actinobacteria;c__Actinobacteria;o__Actinomycetales;f__Nocardiopsaceae":0.0,"k__Bacteria;p__Actinobacteria;c__Actinobacteria;o__Actinomycetales;f__Pseudonocardiaceae":0.0,"k__Bacteria;p__Actinobacteria;c__Actinobacteria;o__Actinomycetales;f__Streptomycetaceae":0.0,"k__Bacteria;p__Actinobacteria;c__Actinobacteria;o__Bifidobacteriales;f__Bifidobacteriaceae":0.0,"k__Bacteria;p__Actinobacteria;c__Actinobacteria;o__WCHB1-81;f__At425_EubF1":0.0,"k__Bacteria;p__Actinobacteria;c__Coriobacteriia;o__Coriobacteriales;f__Coriobacteriaceae":0.0,"k__Bacteria;p__Armatimonadetes;c__SJA-176;o__GAB-B06;f__":0.0,"k__Bacteria;p__Bacteroidetes;__;__;__":0.0,"k__Bacteria;p__Bacteroidetes;c__Bacteroidia;o__Bacteroidales;__":42.0,"k__Bacteria;p__Bacteroidetes;c__Bacteroidia;o__Bacteroidales;f__":1454.0,"k__Bacteria;p__Bacteroidetes;c__Bacteroidia;o__Bacteroidales;f__Bacteroidaceae":0.0,"k__Bacteria;p__Bacteroidetes;c__Bacteroidia;o__Bacteroidales;f__Marinilabiaceae":0.0,"k__Bacteria;p__Bacteroidetes;c__Bacteroidia;o__Bacteroidales;f__Porphyromonadaceae":0.0,"k__Bacteria;p__Bacteroidetes;c__Bacteroidia;o__Bacteroidales;f__Prevotellaceae":0.0,"k__Bacteria;p__Bacteroidetes;c__Bacteroidia;o__Bacteroidales;f__Rikenellaceae":0.0,"k__Bacteria;p__Bacteroidetes;c__Flavobacteriia;o__Flavobacteriales;f__Flavobacteriaceae":11.0,"k__Bacteria;p__Bacteroidetes;c__Sphingobacteriia;o__Sphingobacteriales;f__Sphingobacteriaceae":0.0,"k__Bacteria;p__Bacteroidetes;c__[Saprospirae];o__[Saprospirales];f__Chitinophagaceae":9.0,"k__Bacteria;p__Bacteroidetes;c__[Saprospirae];o__[Saprospirales];f__Saprospiraceae":11.0,"k__Bacteria;p__Caldiserica;c__OP5;o__WCHB1-02;f__SHBZ1169":0.0,"k__Bacteria;p__Caldiserica;c__TTA-B1;o__;f__":0.0,"k__Bacteria;p__Chlorobi;c__Ignavibacteria;o__Ignavibacteriales;f__Ignavibacteriaceae":33.0,"k__Bacteria;p__Chlorobi;c__SJA-28;o__;f__":0.0,"k__Bacteria;p__Chloroflexi;c__;o__;f__":0.0,"k__Bacteria;p__Chloroflexi;c__Anaerolineae;o__Anaerolineales;f__Anaerolinaceae":124.0,"k__Bacteria;p__Chloroflexi;c__Anaerolineae;o__Caldilineales;f__Caldilineaceae":9.0,"k__Bacteria;p__Chloroflexi;c__Anaerolineae;o__OPB11;f__":0.0,"k__Bacteria;p__Chloroflexi;c__Anaerolineae;o__SBR1031;f__SHA-31":0.0,"k__Bacteria;p__Chloroflexi;c__Anaerolineae;o__SHA-20;f__":11.0,"k__Bacteria;p__Chloroflexi;c__Dehalococcoidetes;o__Dehalococcoidales;__":0.0,"k__Bacteria;p__Chloroflexi;c__Ellin6529;o__;f__":0.0,"k__Bacteria;p__Chloroflexi;c__TK17;o__mle1-48;f__":4.0,"k__Bacteria;p__Chloroflexi;c__Thermomicrobia;o__JG30-KF-CM45;f__":28.0,"k__Bacteria;p__Cyanobacteria;c__Chloroplast;o__Streptophyta;f__":0.0,"k__Bacteria;p__EM3;c__;o__;f__":0.0,"k__Bacteria;p__Fibrobacteres;c__Fibrobacteria;o__Fibrobacterales;f__":0.0,"k__Bacteria;p__Fibrobacteres;c__Fibrobacteria;o__Fibrobacterales;f__Fibrobacteraceae":0.0,"k__Bacteria;p__Fibrobacteres;c__TG3;o__TG3-1;f__TSCOR003-O20":0.0,"k__Bacteria;p__Firmicutes;c__Bacilli;__;__":0.0,"k__Bacteria;p__Firmicutes;c__Bacilli;o__Bacillales;__":0.0,"k__Bacteria;p__Firmicutes;c__Bacilli;o__Bacillales;f__Bacillaceae":0.0,"k__Bacteria;p__Firmicutes;c__Bacilli;o__Bacillales;f__Paenibacillaceae":0.0,"k__Bacteria;p__Firmicutes;c__Bacilli;o__Bacillales;f__Planococcaceae":0.0,"k__Bacteria;p__Firmicutes;c__Bacilli;o__Bacillales;f__Staphylococcaceae":0.0,"k__Bacteria;p__Firmicutes;c__Bacilli;o__Bacillales;f__Thermoactinomycetaceae":0.0,"k__Bacteria;p__Firmicutes;c__Bacilli;o__Haloplasmatales;f__Haloplasmataceae":0.0,"k__Bacteria;p__Firmicutes;c__Bacilli;o__Lactobacillales;f__Aerococcaceae":0.0,"k__Bacteria;p__Firmicutes;c__Bacilli;o__Lactobacillales;f__Carnobacteriaceae":14.0,"k__Bacteria;p__Firmicutes;c__Bacilli;o__Lactobacillales;f__Enterococcaceae":0.0,"k__Bacteria;p__Firmicutes;c__Bacilli;o__Lactobacillales;f__Lactobacillaceae":0.0,"k__Bacteria;p__Firmicutes;c__Bacilli;o__Lactobacillales;f__Leuconostocaceae":0.0,"k__Bacteria;p__Firmicutes;c__Bacilli;o__Lactobacillales;f__Streptococcaceae":0.0,"k__Bacteria;p__Firmicutes;c__Bacilli;o__Turicibacterales;f__Turicibacteraceae":0.0,"k__Bacteria;p__Firmicutes;c__Clostridia;__;__":0.0,"k__Bacteria;p__Firmicutes;c__Clostridia;o__;f__":0.0,"k__Bacteria;p__Firmicutes;c__Clostridia;o__BSA2B-08;f__":0.0,"k__Bacteria;p__Firmicutes;c__Clostridia;o__Clostridiales;__":0.0,"k__Bacteria;p__Firmicutes;c__Clostridia;o__Clostridiales;f__":39.0,"k__Bacteria;p__Firmicutes;c__Clostridia;o__Clostridiales;f__Caldicoprobacteraceae":0.0,"k__Bacteria;p__Firmicutes;c__Clostridia;o__Clostridiales;f__Christensenellaceae":0.0,"k__Bacteria;p__Firmicutes;c__Clostridia;o__Clostridiales;f__Clostridiaceae":915.0,"k__Bacteria;p__Firmicutes;c__Clostridia;o__Clostridiales;f__Dehalobacteriaceae":0.0,"k__Bacteria;p__Firmicutes;c__Clostridia;o__Clostridiales;f__EtOH8":13.0,"k__Bacteria;p__Firmicutes;c__Clostridia;o__Clostridiales;f__Eubacteriaceae":0.0,"k__Bacteria;p__Firmicutes;c__Clostridia;o__Clostridiales;f__Gracilibacteraceae":24.0,"k__Bacteria;p__Firmicutes;c__Clostridia;o__Clostridiales;f__Lachnospiraceae":0.0,"k__Bacteria;p__Firmicutes;c__Clostridia;o__Clostridiales;f__Peptococcaceae":0.0,"k__Bacteria;p__Firmicutes;c__Clostridia;o__Clostridiales;f__Peptostreptococcaceae":12.0,"k__Bacteria;p__Firmicutes;c__Clostridia;o__Clostridiales;f__Ruminococcaceae":0.0,"k__Bacteria;p__Firmicutes;c__Clostridia;o__Clostridiales;f__Syntrophomonadaceae":0.0,"k__Bacteria;p__Firmicutes;c__Clostridia;o__Clostridiales;f__Veillonellaceae":0.0,"k__Bacteria;p__Firmicutes;c__Clostridia;o__Clostridiales;f__[Mogibacteriaceae]":11.0,"k__Bacteria;p__Firmicutes;c__Clostridia;o__Clostridiales;f__[Tissierellaceae]":267.0,"k__Bacteria;p__Firmicutes;c__Clostridia;o__Halanaerobiales;f__Halanaerobiaceae":0.0,"k__Bacteria;p__Firmicutes;c__Clostridia;o__MBA08;f__":18.0,"k__Bacteria;p__Firmicutes;c__Clostridia;o__Natranaerobiales;f__":0.0,"k__Bacteria;p__Firmicutes;c__Clostridia;o__Natranaerobiales;f__Anaerobrancaceae":0.0,"k__Bacteria;p__Firmicutes;c__Clostridia;o__Natranaerobiales;f__ML1228J-1":0.0,"k__Bacteria;p__Firmicutes;c__Clostridia;o__Natranaerobiales;f__YAB3B13":0.0,"k__Bacteria;p__Firmicutes;c__Clostridia;o__OPB54;f__":0.0,"k__Bacteria;p__Firmicutes;c__Clostridia;o__SHA-98;f__":47.0,"k__Bacteria;p__Firmicutes;c__Clostridia;o__SHA-98;f__D2":15.0,"k__Bacteria;p__Firmicutes;c__Clostridia;o__Thermoanaerobacterales;f__":0.0,"k__Bacteria;p__Firmicutes;c__Clostridia;o__Thermoanaerobacterales;f__Thermoanaerobacteraceae":0.0,"k__Bacteria;p__Firmicutes;c__Clostridia;o__Thermoanaerobacterales;f__Thermodesulfobiaceae":0.0,"k__Bacteria;p__Firmicutes;c__Erysipelotrichi;o__Erysipelotrichales;f__Erysipelotrichaceae":0.0,"k__Bacteria;p__Firmicutes;c__OPB54;o__;f__":0.0,"k__Bacteria;p__NKB19;c__noFP_H4;o__;f__":11.0,"k__Bacteria;p__OD1;c__;o__;f__":0.0,"k__Bacteria;p__OD1;c__ABY1;o__;f__":0.0,"k__Bacteria;p__OP1;c__OPB14;o__;f__":0.0,"k__Bacteria;p__OP8;c__OP8_1;o__OPB95;f__":0.0,"k__Bacteria;p__OP9;c__JS1;o__BA021;f__":10.0,"k__Bacteria;p__OP9;c__OPB46;o__OPB72;f__TIBD11":0.0,"k__Bacteria;p__OP9;c__OPB46;o__SHA-1;f__":19.0,"k__Bacteria;p__Proteobacteria;c__Alphaproteobacteria;__;__":0.0,"k__Bacteria;p__Proteobacteria;c__Alphaproteobacteria;o__Rhizobiales;f__Hyphomicrobiaceae":6.0,"k__Bacteria;p__Proteobacteria;c__Alphaproteobacteria;o__Rhizobiales;f__Methylobacteriaceae":4.0,"k__Bacteria;p__Proteobacteria;c__Alphaproteobacteria;o__Rhizobiales;f__Methylocystaceae":18.0,"k__Bacteria;p__Proteobacteria;c__Alphaproteobacteria;o__Rhodobacterales;f__Rhodobacteraceae":30.0,"k__Bacteria;p__Proteobacteria;c__Alphaproteobacteria;o__Rhodospirillales;f__Rhodospirillaceae":0.0,"k__Bacteria;p__Proteobacteria;c__Alphaproteobacteria;o__Sphingomonadales;__":0.0,"k__Bacteria;p__Proteobacteria;c__Betaproteobacteria;__;__":0.0,"k__Bacteria;p__Proteobacteria;c__Betaproteobacteria;o__Burkholderiales;f__Alcaligenaceae":0.0,"k__Bacteria;p__Proteobacteria;c__Betaproteobacteria;o__Burkholderiales;f__Burkholderiaceae":5.0,"k__Bacteria;p__Proteobacteria;c__Betaproteobacteria;o__Burkholderiales;f__Comamonadaceae":0.0,"k__Bacteria;p__Proteobacteria;c__Betaproteobacteria;o__Thiobacterales;f__Thiobacteraceae":0.0,"k__Bacteria;p__Proteobacteria;c__Deltaproteobacteria;__;__":0.0,"k__Bacteria;p__Proteobacteria;c__Deltaproteobacteria;o__;f__":0.0,"k__Bacteria;p__Proteobacteria;c__Deltaproteobacteria;o__Syntrophobacterales;f__Syntrophaceae":8.0,"k__Bacteria;p__Proteobacteria;c__Deltaproteobacteria;o__Syntrophobacterales;f__Syntrophorhabdaceae":0.0,"k__Bacteria;p__Proteobacteria;c__Epsilonproteobacteria;o__Campylobacterales;f__Campylobacteraceae":0.0,"k__Bacteria;p__Proteobacteria;c__Gammaproteobacteria;__;__":0.0,"k__Bacteria;p__Proteobacteria;c__Gammaproteobacteria;o__Aeromonadales;f__Aeromonadaceae":0.0,"k__Bacteria;p__Proteobacteria;c__Gammaproteobacteria;o__Aeromonadales;f__Succinivibrionaceae":0.0,"k__Bacteria;p__Proteobacteria;c__Gammaproteobacteria;o__Pseudomonadales;f__Moraxellaceae":0.0,"k__Bacteria;p__Proteobacteria;c__Gammaproteobacteria;o__Pseudomonadales;f__Pseudomonadaceae":0.0,"k__Bacteria;p__Proteobacteria;c__Gammaproteobacteria;o__Xanthomonadales;f__Xanthomonadaceae":12.0,"k__Bacteria;p__SAR406;c__AB16;o__noFP_H7;f__":0.0,"k__Bacteria;p__SR1;c__;o__;f__":260.0,"k__Bacteria;p__Spirochaetes;c__MVP-15;o__PL-11B10;f__":0.0,"k__Bacteria;p__Spirochaetes;c__Spirochaetes;o__Sphaerochaetales;f__Sphaerochaetaceae":0.0,"k__Bacteria;p__Spirochaetes;c__Spirochaetes;o__Spirochaetales;f__Spirochaetaceae":0.0,"k__Bacteria;p__Spirochaetes;c__[Leptospirae];o__[Leptospirales];f__Sediment-4":5.0,"k__Bacteria;p__Synergistetes;c__Synergistia;o__Synergistales;f__":0.0,"k__Bacteria;p__Synergistetes;c__Synergistia;o__Synergistales;f__Anaerobaculaceae":0.0,"k__Bacteria;p__Synergistetes;c__Synergistia;o__Synergistales;f__Dethiosulfovibrionaceae":0.0,"k__Bacteria;p__Synergistetes;c__Synergistia;o__Synergistales;f__Synergistaceae":68.0,"k__Bacteria;p__Synergistetes;c__Synergistia;o__Synergistales;f__Thermovirgaceae":481.0,"k__Bacteria;p__TA06;c__;o__;f__":0.0,"k__Bacteria;p__TM7;c__TM7-1;o__;f__":44.0,"k__Bacteria;p__TM7;c__TM7-3;__;__":9.0,"k__Bacteria;p__TM7;c__TM7-3;o__;f__":0.0,"k__Bacteria;p__TM7;c__TM7-3;o__CW040;f__F16":0.0,"k__Bacteria;p__TM7;c__TM7-3;o__I025;f__":0.0,"k__Bacteria;p__Tenericutes;c__Mollicutes;o__;f__":0.0,"k__Bacteria;p__Tenericutes;c__Mollicutes;o__Acholeplasmatales;f__Acholeplasmataceae":4.0,"k__Bacteria;p__Tenericutes;c__Mollicutes;o__RF39;f__":0.0,"k__Bacteria;p__Tenericutes;c__RF3;o__ML615J-28;f__":0.0,"k__Bacteria;p__Thermotogae;c__Thermotogae;o__Thermotogales;f__Thermotogaceae":0.0,"k__Bacteria;p__Verrucomicrobia;c__Verruco-5;o__LD1-PB3;f__":0.0,"k__Bacteria;p__Verrucomicrobia;c__[Pedosphaerae];o__[Pedosphaerales];f__R4-41B":0.0,"k__Bacteria;p__WPS-2;c__;o__;f__":0.0,"k__Bacteria;p__WS6;c__SC72;o__A-2AF;f__":0.0,"k__Bacteria;p__WS6;c__SC72;o__WCHB1-15;f__":0.0,"k__Bacteria;p__WWE1;c__[Cloacamonae];o__[Cloacamonales];f__":0.0,"k__Bacteria;p__WWE1;c__[Cloacamonae];o__[Cloacamonales];f__CW-1":0.0,"k__Bacteria;p__WWE1;c__[Cloacamonae];o__[Cloacamonales];f__[Cloacamonaceae]":28.0,"plant type":"SSD","plant no.":"#15"}]);
