# Supplementary material for: Arsenic metabolism in technical biogas plants: possible consequences for resident microbiota and downstream units
Source: AMB Express. 2019 Nov 28;9:190. doi: 10.1186/s13568-019-0902-6 (PMC6882981; doi:10.1186/s13568-019-0902-6)
Supplement: Supplementary file 2 — Additional file 2. Additional electronic material, which provides full dataset of Figure 1 (Qiime2 files). [file 13568_2019_902_MOESM2_ESM.qzv › 41ab44e8-4670-4568-81db-98b188333850/data/q2templateassets/js/parent.js]

// ----------------------------------------------------------------------------
// Copyright (c) 2016-2019, QIIME 2 development team.
//
// Distributed under the terms of the Modified BSD License.
//
// The full license is in the file LICENSE, distributed with this software.
// ----------------------------------------------------------------------------

var frame;

function frameLoad(event) {
  frame.height = `${event.data + 50}px`;
}

function toggleClass() {
  if (document.querySelector('.active').id != this.id) {
    document.querySelector('.active').className = '';
    this.className = 'active';
    frame.height = '0px';
    frame.contentWindow.location.replace(frameSrc[this.id]);
  }
}

function init() {
  for (const frame of Object.keys(frameSrc)) {
    document.getElementById(frame).addEventListener('click', toggleClass);
  }
  frame = document.getElementById('tab-frame');
}

document.addEventListener('DOMContentLoaded', init);
window.addEventListener('message', frameLoad);
