# Supplementary material for: Arsenic metabolism in technical biogas plants: possible consequences for resident microbiota and downstream units
Source: AMB Express. 2019 Nov 28;9:190. doi: 10.1186/s13568-019-0902-6 (PMC6882981; doi:10.1186/s13568-019-0902-6)
Supplement: Supplementary file 2 — Additional file 2. Additional electronic material, which provides full dataset of Figure 1 (Qiime2 files). [file 13568_2019_902_MOESM2_ESM.qzv › 41ab44e8-4670-4568-81db-98b188333850/provenance/action/metadata.tsv]

#SampleID	plant type	plant no.
#q2:types	categorical	categorical
01_U341F-U806R-NW3-1	Biogas	#01
10_U341F-U806R-NW3-11	Biogas	#10
11_U341F-U806R-NW3-12	Biogas	#11
12_U341F-U806R-NW3-14	Biogas	#12
13_U341F-U806R-NW3-15	Biogas	#13
14_U341F-U806R-NW3-7	SSD	#14
15_U341F-U806R-NW3-13	SSD	#15
02_U341F-U806R-NW3-2	Biogas	#02
03_U341F-U806R-NW3-3	Biogas	#02
04_U341F-U806R-NW3-4	Biogas	#04
05_U341F-U806R-NW3-5	Biogas	#05
06_U341F-U806R-NW3-6	Biogas	#06
07_U341F-U806R-NW3-8	Biogas	#07
08_U341F-U806R-NW3-9	Biogas	#08
09_U341F-U806R-NW3-10	Biogas	#09
