# Supplementary material for: Arsenic metabolism in technical biogas plants: possible consequences for resident microbiota and downstream units
Source: AMB Express. 2019 Nov 28;9:190. doi: 10.1186/s13568-019-0902-6 (PMC6882981; doi:10.1186/s13568-019-0902-6)
Supplement: Supplementary file 2 — Additional file 2. Additional electronic material, which provides full dataset of Figure 1 (Qiime2 files). [file 13568_2019_902_MOESM2_ESM.qzv › 41ab44e8-4670-4568-81db-98b188333850/provenance/artifacts/4abdda52-c3e4-47f0-9813-2b11485694e5/citations.bib]

@article{framework|qiime2:2018.6.0|0,
 author = {Caporaso, J Gregory and Kuczynski, Justin and Stombaugh, Jesse and Bittinger, Kyle and Bushman, Frederic D and Costello, Elizabeth K and Fierer, Noah and Peña, Antonio Gonzalez and Goodrich, Julia K and Gordon, Jeffrey I and Huttley, Gavin A and Kelley, Scott T and Knights, Dan and Koenig, Jeremy E and Ley, Ruth E and Lozupone, Catherine A and McDonald, Daniel and Muegge, Brian D and Pirrung, Meg and Reeder, Jens and Sevinsky, Joel R and Turnbaugh, Peter J and Walters, William A and Widmann, Jeremy and Yatsunenko, Tanya and Zaneveld, Jesse and Knight, Rob},
 doi = {10.1038/nmeth.f.303},
 journal = {Nature methods},
 number = {5},
 pages = {335},
 publisher = {Nature Publishing Group},
 title = {QIIME allows analysis of high-throughput community sequencing data},
 volume = {7},
 year = {2010}
}

@article{action|feature-classifier:2018.6.0|method:fit_classifier_naive_bayes|0,
 author = {Pedregosa, Fabian and Varoquaux, Gaël and Gramfort, Alexandre and Michel, Vincent and Thirion, Bertrand and Grisel, Olivier and Blondel, Mathieu and Prettenhofer, Peter and Weiss, Ron and Dubourg, Vincent and Vanderplas, Jake and Passos, Alexandre and Cournapeau, David and Brucher, Matthieu and Perrot, Matthieu and Duchesnay, Édouard},
 journal = {Journal of machine learning research},
 number = {Oct},
 pages = {2825--2830},
 title = {Scikit-learn: Machine learning in Python},
 volume = {12},
 year = {2011}
}

@inproceedings{view|types:2018.6.0|pandas.core.series:Series|0,
 author = { Wes McKinney },
 booktitle = { Proceedings of the 9th Python in Science Conference },
 editor = { Stéfan van der Walt and Jarrod Millman },
 pages = { 51 -- 56 },
 title = { Data Structures for Statistical Computing in Python },
 year = { 2010 }
}

@article{plugin|feature-classifier:2018.6.0|0,
 author = {Bokulich, Nicholas A. and Kaehler, Benjamin D. and Rideout, Jai Ram and Dillon, Matthew and Bolyen, Evan and Knight, Rob and Huttley, Gavin A. and Caporaso, J. Gregory},
 doi = {10.1186/s40168-018-0470-z},
 journal = {Microbiome},
 number = {1},
 pages = {90},
 title = {Optimizing taxonomic classification of marker-gene amplicon sequences with QIIME 2's q2-feature-classifier plugin},
 url = {https://doi.org/10.1186/s40168-018-0470-z},
 volume = {6},
 year = {2018}
}
