# Supplementary material for: Arsenic metabolism in technical biogas plants: possible consequences for resident microbiota and downstream units
Source: AMB Express. 2019 Nov 28;9:190. doi: 10.1186/s13568-019-0902-6 (PMC6882981; doi:10.1186/s13568-019-0902-6)
Supplement: Supplementary file 2 — Additional file 2. Additional electronic material, which provides full dataset of Figure 1 (Qiime2 files). [file 13568_2019_902_MOESM2_ESM.qzv › 41ab44e8-4670-4568-81db-98b188333850/provenance/artifacts/cbdba207-95b8-49eb-8d33-a7b5f852690a/action/action.yaml]

execution:
    uuid: 895e8292-27d3-4bea-b9ab-0067c6da3e0e
    runtime:
        start: 2018-08-10T10:29:19.027031+00:00
        end: 2018-08-10T10:30:10.628541+00:00
        duration: 51 seconds, and 601510 microseconds

action:
    type: method
    plugin: !ref 'environment:plugins:feature-classifier'
    action: classify_sklearn
    inputs:
    -   reads: d4dbb9b2-74d3-4db6-a827-cf83ea0ba0fb
    -   classifier: 4abdda52-c3e4-47f0-9813-2b11485694e5
    parameters:
    -   reads_per_batch: 0
    -   n_jobs: 1
    -   pre_dispatch: 2*n_jobs
    -   confidence: 0.7
    -   read_orientation: null
    output-name: classification
    citations:
    - !cite 'action|feature-classifier:2018.6.0|method:classify_sklearn|0'

transformers:
    inputs:
        reads:
        -   from: DNASequencesDirectoryFormat
            to: DNAFASTAFormat
        classifier:
        -   from: TaxonomicClassiferTemporaryPickleDirFmt
            to: sklearn.pipeline:Pipeline
            plugin: !ref 'environment:plugins:feature-classifier'
    output:
    -   from: pandas.core.frame:DataFrame
        to: TSVTaxonomyDirectoryFormat
        plugin: !ref 'environment:plugins:types'
        citations:
        - !cite 'view|types:2018.6.0|pandas.core.frame:DataFrame|0'

environment:
    platform: linux-x86_64
    python: |-
        3.5.5 | packaged by conda-forge | (default, Apr  6 2018, 13:41:05)
        [GCC 4.8.2 20140120 (Red Hat 4.8.2-15)]
    framework:
        version: 2018.6.0
        website: https://qiime2.org
        citations:
        - !cite 'framework|qiime2:2018.6.0|0'
    plugins:
        types:
            version: 2018.6.0
            website: https://github.com/qiime2/q2-types
        feature-classifier:
            version: 2018.6.0
            website: https://github.com/qiime2/q2-feature-classifier
            citations:
            - !cite 'plugin|feature-classifier:2018.6.0|0'
    python-packages:
        xopen: 0.3.2
        widgetsnbextension: 3.2.1
        wheel: 0.31.0
        webencodings: '0.5'
        wcwidth: 0.1.7
        urllib3: '1.23'
        unifrac: 0.9.2
        traitlets: 4.3.2
        tornado: 5.0.2
        testpath: 0.3.1
        terminado: 0.8.1
        statsmodels: 0.9.0
        six: 1.11.0
        simplegeneric: 0.8.1
        setuptools: 39.2.0
        Send2Trash: 1.5.0
        seaborn: 0.8.1
        scipy: 0.19.1
        scikit-learn: 0.19.1
        scikit-bio: 0.5.1
        requests: 2.19.1
        qiime2: 2018.6.0
        q2templates: 2018.6.0
        q2cli: 2018.6.0
        q2-vsearch: 2018.6.0
        q2-types: 2018.6.0
        q2-taxa: 2018.6.0
        q2-sample-classifier: 2018.6.0
        q2-quality-filter: 2018.6.0
        q2-quality-control: 2018.6.1
        q2-phylogeny: 2018.6.0
        q2-metadata: 2018.6.0
        q2-longitudinal: 2018.6.0
        q2-gneiss: 2018.6.0
        q2-feature-table: 2018.6.0
        q2-feature-classifier: 2018.6.0
        q2-emperor: 2018.6.0
        q2-diversity: 2018.6.0
        q2-demux: 2018.6.0
        q2-deblur: 2018.6.0
        q2-dada2: 2018.6.0
        q2-cutadapt: 2018.6.0
        q2-composition: 2018.6.0
        q2-alignment: 2018.6.0
        pyzmq: 17.0.0
        PyYAML: '3.12'
        pytz: '2018.4'
        python-dateutil: 2.7.3
        PySocks: 1.6.8
        pyparsing: 2.2.0
        pyOpenSSL: 18.0.0
        Pygments: 2.2.0
        pycparser: '2.18'
        ptyprocess: 0.6.0
        psutil: 5.4.6
        prompt-toolkit: 1.0.15
        pip: 9.0.3
        pickleshare: 0.7.4
        pexpect: 4.6.0
        patsy: 0.5.0
        parso: 0.2.1
        pandocfilters: 1.4.2
        pandas: 0.23.1
        packaging: '17.1'
        numpy: 1.12.1
        notebook: 5.5.0
        nose: 1.3.7
        nbformat: 4.4.0
        nbconvert: 5.3.1
        natsort: 5.3.2
        msgpack: 0.5.6
        mistune: 0.8.3
        matplotlib: 2.2.2
        MarkupSafe: '1.0'
        lockfile: 0.12.2
        kiwisolver: 1.0.1
        jupyter-core: 4.4.0
        jupyter-client: 5.2.3
        jsonschema: 2.6.0
        Jinja2: '2.10'
        jedi: 0.12.0
        ipywidgets: 7.2.1
        ipython: 6.4.0
        ipython-genutils: 0.2.0
        ipykernel: 4.8.2
        idna: '2.7'
        html5lib: 1.0.1
        h5py: 2.7.0
        future: 0.16.0
        fastcluster: 1.1.25
        entrypoints: 0.2.3
        emperor: 1.0.0b16
        decorator: 4.3.0
        deblur: 1.0.4
        Cython: 0.28.3
        cycler: 0.10.0
        cutadapt: '1.16'
        cryptography: 2.2.1
        click: '6.7'
        chardet: 3.0.4
        cffi: 1.11.5
        certifi: 2018.4.16
        CacheControl: 0.12.4
        bz2file: '0.98'
        bokeh: 0.12.16
        bleach: 2.1.3
        bibtexparser: 1.0.1
        backcall: 0.1.0
        asn1crypto: 0.24.0
        biom-format: 2.1.6
        gneiss: 0.4.4
        ijson: '2.3'
        tzlocal: '1.3'
