# Supplementary material for: Arsenic metabolism in technical biogas plants: possible consequences for resident microbiota and downstream units
Source: AMB Express. 2019 Nov 28;9:190. doi: 10.1186/s13568-019-0902-6 (PMC6882981; doi:10.1186/s13568-019-0902-6)
Supplement: Supplementary file 2 — Additional file 2. Additional electronic material, which provides full dataset of Figure 1 (Qiime2 files). [file 13568_2019_902_MOESM2_ESM.qzv › 41ab44e8-4670-4568-81db-98b188333850/provenance/artifacts/cbdba207-95b8-49eb-8d33-a7b5f852690a/metadata.yaml]

uuid: cbdba207-95b8-49eb-8d33-a7b5f852690a
type: FeatureData[Taxonomy]
format: TSVTaxonomyDirectoryFormat
