# Supplementary material for: Arsenic metabolism in technical biogas plants: possible consequences for resident microbiota and downstream units
Source: AMB Express. 2019 Nov 28;9:190. doi: 10.1186/s13568-019-0902-6 (PMC6882981; doi:10.1186/s13568-019-0902-6)
Supplement: Supplementary file 2 — Additional file 2. Additional electronic material, which provides full dataset of Figure 1 (Qiime2 files). [file 13568_2019_902_MOESM2_ESM.qzv › 41ab44e8-4670-4568-81db-98b188333850/provenance/artifacts/f6fa68d6-9593-42c8-8a04-0bc34db08461/citations.bib]

@article{framework|qiime2:2018.6.0|0,
 author = {Caporaso, J Gregory and Kuczynski, Justin and Stombaugh, Jesse and Bittinger, Kyle and Bushman, Frederic D and Costello, Elizabeth K and Fierer, Noah and Peña, Antonio Gonzalez and Goodrich, Julia K and Gordon, Jeffrey I and Huttley, Gavin A and Kelley, Scott T and Knights, Dan and Koenig, Jeremy E and Ley, Ruth E and Lozupone, Catherine A and McDonald, Daniel and Muegge, Brian D and Pirrung, Meg and Reeder, Jens and Sevinsky, Joel R and Turnbaugh, Peter J and Walters, William A and Widmann, Jeremy and Yatsunenko, Tanya and Zaneveld, Jesse and Knight, Rob},
 doi = {10.1038/nmeth.f.303},
 journal = {Nature methods},
 number = {5},
 pages = {335},
 publisher = {Nature Publishing Group},
 title = {QIIME allows analysis of high-throughput community sequencing data},
 volume = {7},
 year = {2010}
}

@article{plugin|feature-classifier:2018.6.0|0,
 author = {Bokulich, Nicholas A. and Kaehler, Benjamin D. and Rideout, Jai Ram and Dillon, Matthew and Bolyen, Evan and Knight, Rob and Huttley, Gavin A. and Caporaso, J. Gregory},
 doi = {10.1186/s40168-018-0470-z},
 journal = {Microbiome},
 number = {1},
 pages = {90},
 title = {Optimizing taxonomic classification of marker-gene amplicon sequences with QIIME 2's q2-feature-classifier plugin},
 url = {https://doi.org/10.1186/s40168-018-0470-z},
 volume = {6},
 year = {2018}
}
