# Supplementary material for: Arsenic metabolism in technical biogas plants: possible consequences for resident microbiota and downstream units
Source: AMB Express. 2019 Nov 28;9:190. doi: 10.1186/s13568-019-0902-6 (PMC6882981; doi:10.1186/s13568-019-0902-6)
Supplement: Supplementary file 3 — Additional file 3. Additional electronic material (Qiime2 files). [file 13568_2019_902_MOESM3_ESM.qzv]

Archive with 65 entries (65 files):
- efce6f8b-9ad8-46e7-a1e4-5087d1d706a9/checksums.md5
- efce6f8b-9ad8-46e7-a1e4-5087d1d706a9/metadata.yaml
- efce6f8b-9ad8-46e7-a1e4-5087d1d706a9/VERSION
- efce6f8b-9ad8-46e7-a1e4-5087d1d706a9/data/level-7.csv
- efce6f8b-9ad8-46e7-a1e4-5087d1d706a9/data/level-5.csv
- efce6f8b-9ad8-46e7-a1e4-5087d1d706a9/data/level-3.jsonp
- efce6f8b-9ad8-46e7-a1e4-5087d1d706a9/data/level-6.csv
- efce6f8b-9ad8-46e7-a1e4-5087d1d706a9/data/level-6.jsonp
- efce6f8b-9ad8-46e7-a1e4-5087d1d706a9/data/level-2.csv
- efce6f8b-9ad8-46e7-a1e4-5087d1d706a9/data/level-1.csv
- efce6f8b-9ad8-46e7-a1e4-5087d1d706a9/data/level-4.csv
- efce6f8b-9ad8-46e7-a1e4-5087d1d706a9/data/level-4.jsonp
- efce6f8b-9ad8-46e7-a1e4-5087d1d706a9/data/level-2.jsonp
- efce6f8b-9ad8-46e7-a1e4-5087d1d706a9/data/index.html
- efce6f8b-9ad8-46e7-a1e4-5087d1d706a9/data/level-7.jsonp
- efce6f8b-9ad8-46e7-a1e4-5087d1d706a9/data/level-5.jsonp
- efce6f8b-9ad8-46e7-a1e4-5087d1d706a9/data/level-1.jsonp
- efce6f8b-9ad8-46e7-a1e4-5087d1d706a9/data/level-3.csv
- efce6f8b-9ad8-46e7-a1e4-5087d1d706a9/data/dist/vendor.bundle.js
- efce6f8b-9ad8-46e7-a1e4-5087d1d706a9/data/dist/bundle.js
- efce6f8b-9ad8-46e7-a1e4-5087d1d706a9/data/dist/d3-license.txt
- efce6f8b-9ad8-46e7-a1e4-5087d1d706a9/data/dist/d3-scale-chromatic-license.txt
- efce6f8b-9ad8-46e7-a1e4-5087d1d706a9/data/dist/thenBy-license.txt
- efce6f8b-9ad8-46e7-a1e4-5087d1d706a9/data/q2templateassets/css/bootstrap.min.css
- efce6f8b-9ad8-46e7-a1e4-5087d1d706a9/data/q2templateassets/css/tab-parent.css
- efce6f8b-9ad8-46e7-a1e4-5087d1d706a9/data/q2templateassets/css/normalize.css
- efce6f8b-9ad8-46e7-a1e4-5087d1d706a9/data/q2templateassets/js/parent.js
- efce6f8b-9ad8-46e7-a1e4-5087d1d706a9/data/q2templateassets/js/child.js
- efce6f8b-9ad8-46e7-a1e4-5087d1d706a9/data/q2templateassets/js/bootstrap.min.js
- efce6f8b-9ad8-46e7-a1e4-5087d1d706a9/data/q2templateassets/js/jquery-3.2.0.min.js
- efce6f8b-9ad8-46e7-a1e4-5087d1d706a9/data/q2templateassets/img/qiime2-rect-200.png
- efce6f8b-9ad8-46e7-a1e4-5087d1d706a9/data/q2templateassets/fonts/glyphicons-halflings-regular.eot
- efce6f8b-9ad8-46e7-a1e4-5087d1d706a9/data/q2templateassets/fonts/glyphicons-halflings-regular.svg
- efce6f8b-9ad8-46e7-a1e4-5087d1d706a9/data/q2templateassets/fonts/glyphicons-halflings-regular.ttf
- efce6f8b-9ad8-46e7-a1e4-5087d1d706a9/data/q2templateassets/fonts/glyphicons-halflings-regular.woff2
- efce6f8b-9ad8-46e7-a1e4-5087d1d706a9/data/q2templateassets/fonts/glyphicons-halflings-regular.woff
- efce6f8b-9ad8-46e7-a1e4-5087d1d706a9/provenance/citations.bib
- efce6f8b-9ad8-46e7-a1e4-5087d1d706a9/provenance/metadata.yaml
- efce6f8b-9ad8-46e7-a1e4-5087d1d706a9/provenance/VERSION
- efce6f8b-9ad8-46e7-a1e4-5087d1d706a9/provenance/action/metadata.tsv
- efce6f8b-9ad8-46e7-a1e4-5087d1d706a9/provenance/action/action.yaml
- efce6f8b-9ad8-46e7-a1e4-5087d1d706a9/provenance/artifacts/efe37421-68f1-4a86-8818-59f4b04bed12/metadata.yaml
- efce6f8b-9ad8-46e7-a1e4-5087d1d706a9/provenance/artifacts/efe37421-68f1-4a86-8818-59f4b04bed12/VERSION
- efce6f8b-9ad8-46e7-a1e4-5087d1d706a9/provenance/artifacts/efe37421-68f1-4a86-8818-59f4b04bed12/action/action.yaml
- efce6f8b-9ad8-46e7-a1e4-5087d1d706a9/provenance/artifacts/f1d80efb-8972-468c-a086-5f4e54de57f8/metadata.yaml
- efce6f8b-9ad8-46e7-a1e4-5087d1d706a9/provenance/artifacts/f1d80efb-8972-468c-a086-5f4e54de57f8/VERSION
- efce6f8b-9ad8-46e7-a1e4-5087d1d706a9/provenance/artifacts/f1d80efb-8972-468c-a086-5f4e54de57f8/action/action.yaml
- efce6f8b-9ad8-46e7-a1e4-5087d1d706a9/provenance/artifacts/2b437c6d-5801-4d71-81e8-eaee94457a89/metadata.yaml
- efce6f8b-9ad8-46e7-a1e4-5087d1d706a9/provenance/artifacts/2b437c6d-5801-4d71-81e8-eaee94457a89/VERSION
- efce6f8b-9ad8-46e7-a1e4-5087d1d706a9/provenance/artifacts/2b437c6d-5801-4d71-81e8-eaee94457a89/action/action.yaml
- efce6f8b-9ad8-46e7-a1e4-5087d1d706a9/provenance/artifacts/2bbf8d3f-a683-4e15-87a6-b8bf3999cf55/metadata.yaml
- efce6f8b-9ad8-46e7-a1e4-5087d1d706a9/provenance/artifacts/2bbf8d3f-a683-4e15-87a6-b8bf3999cf55/VERSION
- efce6f8b-9ad8-46e7-a1e4-5087d1d706a9/provenance/artifacts/2bbf8d3f-a683-4e15-87a6-b8bf3999cf55/action/action.yaml
- efce6f8b-9ad8-46e7-a1e4-5087d1d706a9/provenance/artifacts/653b4390-c316-4ae8-88dc-c08221efe7c0/metadata.yaml
- efce6f8b-9ad8-46e7-a1e4-5087d1d706a9/provenance/artifacts/653b4390-c316-4ae8-88dc-c08221efe7c0/VERSION
- efce6f8b-9ad8-46e7-a1e4-5087d1d706a9/provenance/artifacts/653b4390-c316-4ae8-88dc-c08221efe7c0/action/action.yaml
- efce6f8b-9ad8-46e7-a1e4-5087d1d706a9/provenance/artifacts/1d44ba70-1f55-4a34-8d87-7d005ba73f43/metadata.yaml
- efce6f8b-9ad8-46e7-a1e4-5087d1d706a9/provenance/artifacts/1d44ba70-1f55-4a34-8d87-7d005ba73f43/VERSION
- efce6f8b-9ad8-46e7-a1e4-5087d1d706a9/provenance/artifacts/1d44ba70-1f55-4a34-8d87-7d005ba73f43/action/action.yaml
- efce6f8b-9ad8-46e7-a1e4-5087d1d706a9/provenance/artifacts/44603abb-5c65-40a3-b078-95a303f60c2b/metadata.yaml
- efce6f8b-9ad8-46e7-a1e4-5087d1d706a9/provenance/artifacts/44603abb-5c65-40a3-b078-95a303f60c2b/VERSION
- efce6f8b-9ad8-46e7-a1e4-5087d1d706a9/provenance/artifacts/44603abb-5c65-40a3-b078-95a303f60c2b/action/action.yaml
- efce6f8b-9ad8-46e7-a1e4-5087d1d706a9/provenance/artifacts/67edda4c-ee9d-4798-8e3f-098d671cb99e/metadata.yaml
- efce6f8b-9ad8-46e7-a1e4-5087d1d706a9/provenance/artifacts/67edda4c-ee9d-4798-8e3f-098d671cb99e/VERSION
- efce6f8b-9ad8-46e7-a1e4-5087d1d706a9/provenance/artifacts/67edda4c-ee9d-4798-8e3f-098d671cb99e/action/action.yaml
