# Supplementary material for: Arsenic metabolism in technical biogas plants: possible consequences for resident microbiota and downstream units
Source: AMB Express. 2019 Nov 28;9:190. doi: 10.1186/s13568-019-0902-6 (PMC6882981; doi:10.1186/s13568-019-0902-6)
Supplement: Supplementary file 3 — Additional file 3. Additional electronic material (Qiime2 files). [file 13568_2019_902_MOESM3_ESM.qzv › efce6f8b-9ad8-46e7-a1e4-5087d1d706a9/checksums.md5]

feea9bc4f7035a12723bfa8775a74d59  VERSION
1a450bcedcc9e649dab372ba5adacba6  metadata.yaml
96a668a02aef3b4614d8c3a29c12b26b  data/index.html
c0d6b1664f31f4a5f9a059eb5dcc5aa5  data/level-1.csv
d4634eff9976355f801b254852982a0f  data/level-1.jsonp
72aaa4afc552993615c618c88fe5722c  data/level-2.csv
eb5f3c9d7ef817b472e2665d2bc2e49f  data/level-2.jsonp
c1706b8ff53e9bbbaaf5d3d9ebb85c9d  data/level-3.csv
b8726ad6ffa1a81df3512f9331d72750  data/level-3.jsonp
0ec1c6501698149de4ee60cb16be81b5  data/level-4.csv
6e7b0b270b3f481dd433f1f97f9601bc  data/level-4.jsonp
b227330d80540284ff3d7d1d4c570543  data/level-5.csv
00a0e6091db88a146c118dd0be4dcd25  data/level-5.jsonp
b0b5840acc1271e4f90582645e8661ad  data/level-6.csv
e444cbf68a3d8431aabc2c70d860ab86  data/level-6.jsonp
eac70f34cbbe632f54502fceb5eae283  data/level-7.csv
4b5a41407da2a51be8792045405591da  data/level-7.jsonp
76d1a901dd33517cbddce77cf2cb41ca  data/dist/bundle.js
50142b6c2444076623d0819ea6448352  data/dist/d3-license.txt
daa4a96370c888d3a03365173482516e  data/dist/d3-scale-chromatic-license.txt
ecca8f2b8a84749ce6623ef81b19e5ed  data/dist/thenBy-license.txt
ccec0221608959985178200f31c9d7e2  data/dist/vendor.bundle.js
e3e8b38fed66211f84a6d5ddb8e0f876  data/q2templateassets/css/bootstrap.min.css
be7f3425b44480dcf3aab3408f632f37  data/q2templateassets/css/normalize.css
0893e573eb42bc294a478a3e187fa80b  data/q2templateassets/css/tab-parent.css
f4769f9bdb7466be65088239c12046d1  data/q2templateassets/fonts/glyphicons-halflings-regular.eot
89889688147bd7575d6327160d64e760  data/q2templateassets/fonts/glyphicons-halflings-regular.svg
e18bbf611f2a2e43afc071aa2f4e1512  data/q2templateassets/fonts/glyphicons-halflings-regular.ttf
fa2772327f55d8198301fdb8bcfc8158  data/q2templateassets/fonts/glyphicons-halflings-regular.woff
448c34a56d699c29117adc64c43affeb  data/q2templateassets/fonts/glyphicons-halflings-regular.woff2
91a940675401d7263fd5da9360f20881  data/q2templateassets/img/qiime2-rect-200.png
5869c96cc8f19086aee625d670d741f9  data/q2templateassets/js/bootstrap.min.js
794b5307794fec58b12f1ab690cedee1  data/q2templateassets/js/child.js
d4162c9d7e520a5de05001be6e741899  data/q2templateassets/js/jquery-3.2.0.min.js
bc1efc8406af887ba7ed6fccbe229a81  data/q2templateassets/js/parent.js
feea9bc4f7035a12723bfa8775a74d59  provenance/VERSION
5f4d26baf882d2c66228c95e19901ce4  provenance/citations.bib
1a450bcedcc9e649dab372ba5adacba6  provenance/metadata.yaml
451699a2e3a775a13e6d5ac4343de20f  provenance/action/action.yaml
a506f7e5bc75289c5b514d97b2c842ad  provenance/action/metadata.tsv
c2c57f2b4d412141865ecfeaea28e42a  provenance/artifacts/1d44ba70-1f55-4a34-8d87-7d005ba73f43/VERSION
a81a67cd69576817a07671c947267d26  provenance/artifacts/1d44ba70-1f55-4a34-8d87-7d005ba73f43/metadata.yaml
298eed4ca22e3d7c3d390788619357aa  provenance/artifacts/1d44ba70-1f55-4a34-8d87-7d005ba73f43/action/action.yaml
2f8317dd725209cf97b2d3c3ccedaca0  provenance/artifacts/2b437c6d-5801-4d71-81e8-eaee94457a89/VERSION
639e1e21a896496a2f07c24ff62600ef  provenance/artifacts/2b437c6d-5801-4d71-81e8-eaee94457a89/metadata.yaml
88b3289099de6e5aeaf422378c0661d4  provenance/artifacts/2b437c6d-5801-4d71-81e8-eaee94457a89/action/action.yaml
2f8317dd725209cf97b2d3c3ccedaca0  provenance/artifacts/2bbf8d3f-a683-4e15-87a6-b8bf3999cf55/VERSION
a523e6dd8645fee4b11346c7f05a3fc1  provenance/artifacts/2bbf8d3f-a683-4e15-87a6-b8bf3999cf55/metadata.yaml
3ec51d222cb93758492263ccfbd9eb0c  provenance/artifacts/2bbf8d3f-a683-4e15-87a6-b8bf3999cf55/action/action.yaml
c2c57f2b4d412141865ecfeaea28e42a  provenance/artifacts/44603abb-5c65-40a3-b078-95a303f60c2b/VERSION
af517f0aaaafa3d7819388962e9e5d4a  provenance/artifacts/44603abb-5c65-40a3-b078-95a303f60c2b/metadata.yaml
b9356e3a7444d5afa41f620398bcebf2  provenance/artifacts/44603abb-5c65-40a3-b078-95a303f60c2b/action/action.yaml
2f8317dd725209cf97b2d3c3ccedaca0  provenance/artifacts/653b4390-c316-4ae8-88dc-c08221efe7c0/VERSION
710a38d14cf8223c01c7c18984977380  provenance/artifacts/653b4390-c316-4ae8-88dc-c08221efe7c0/metadata.yaml
bc21a56c723965521229eeac3079220c  provenance/artifacts/653b4390-c316-4ae8-88dc-c08221efe7c0/action/action.yaml
c2c57f2b4d412141865ecfeaea28e42a  provenance/artifacts/67edda4c-ee9d-4798-8e3f-098d671cb99e/VERSION
d98efe7064e6533901f7e812243ac6fc  provenance/artifacts/67edda4c-ee9d-4798-8e3f-098d671cb99e/metadata.yaml
6bacd0d444c59af84fc1aad85b929a99  provenance/artifacts/67edda4c-ee9d-4798-8e3f-098d671cb99e/action/action.yaml
2f8317dd725209cf97b2d3c3ccedaca0  provenance/artifacts/efe37421-68f1-4a86-8818-59f4b04bed12/VERSION
ed8ce44e060ef1c587d91ab988c00429  provenance/artifacts/efe37421-68f1-4a86-8818-59f4b04bed12/metadata.yaml
1acc827384457ed84370d3a1d699e462  provenance/artifacts/efe37421-68f1-4a86-8818-59f4b04bed12/action/action.yaml
c2c57f2b4d412141865ecfeaea28e42a  provenance/artifacts/f1d80efb-8972-468c-a086-5f4e54de57f8/VERSION
b304f047cecc54f7286bce60b52f3e42  provenance/artifacts/f1d80efb-8972-468c-a086-5f4e54de57f8/metadata.yaml
1b9225b652a0fb3c312a2c1fcf7bed2c  provenance/artifacts/f1d80efb-8972-468c-a086-5f4e54de57f8/action/action.yaml
