# Supplementary material for: Arsenic metabolism in technical biogas plants: possible consequences for resident microbiota and downstream units
Source: AMB Express. 2019 Nov 28;9:190. doi: 10.1186/s13568-019-0902-6 (PMC6882981; doi:10.1186/s13568-019-0902-6)
Supplement: Supplementary file 3 — Additional file 3. Additional electronic material (Qiime2 files). [file 13568_2019_902_MOESM3_ESM.qzv › efce6f8b-9ad8-46e7-a1e4-5087d1d706a9/data/level-1.csv]

index	k__Archaea	k__Bacteria	Process Day	arsenite add.	plant no.	plant type
U341F-U806R-P1-NW4-1-14-40	562.0	5189.0	01	As0	#14	SSD
U341F-U806R-P1-NW4-1-14-41	1548.0	11578.0	01	As0	#14	SSD
U341F-U806R-P1-NW4-1-27-100	942.0	16693.0	15	As0	#14	SSD
U341F-U806R-P1-NW4-1-29-104	290.0	19913.0	15	As30	#14	SSD
U341F-U806R-P1-NW4-1-31-108	257.0	9476.0	15	As60	#14	SSD
U341F-U806R-P1-NW4-1-31-109	226.0	9713.0	15	As60	#14	SSD
U341F-U806R-P1-NW4-1-33-79	346.0	16908.0	01	As0	#01	Biogas
U341F-U806R-P1-NW4-1-33-80	177.0	11613.0	01	As0	#01	Biogas
U341F-U806R-P1-NW4-1-34-82	117.0	4849.0	15	As0	#01	Biogas
U341F-U806R-P1-NW4-1-34-83	192.0	8673.0	15	As0	#01	Biogas
U341F-U806R-P1-NW4-1-36-88	173.0	11410.0	15	As30	#01	Biogas
U341F-U806R-P1-NW4-1-36-89	295.0	14959.0	15	As30	#01	Biogas
U341F-U806R-P1-NW4-1-38-94	82.0	5386.0	15	As60	#01	Biogas
U341F-U806R-P1-NW4-1-38-95	188.0	7733.0	15	As60	#01	Biogas
