# Supplementary material for: Arsenic metabolism in technical biogas plants: possible consequences for resident microbiota and downstream units
Source: AMB Express. 2019 Nov 28;9:190. doi: 10.1186/s13568-019-0902-6 (PMC6882981; doi:10.1186/s13568-019-0902-6)
Supplement: Supplementary file 3 — Additional file 3. Additional electronic material (Qiime2 files). [file 13568_2019_902_MOESM3_ESM.qzv › efce6f8b-9ad8-46e7-a1e4-5087d1d706a9/data/level-2.csv]

index	k__Archaea;p__Euryarchaeota	k__Bacteria;__	k__Bacteria;p__	k__Bacteria;p__Acidobacteria	k__Bacteria;p__Actinobacteria	k__Bacteria;p__Bacteroidetes	k__Bacteria;p__Caldiserica	k__Bacteria;p__Chlorobi	k__Bacteria;p__Chloroflexi	k__Bacteria;p__Cyanobacteria	k__Bacteria;p__EM3	k__Bacteria;p__Fibrobacteres	k__Bacteria;p__Firmicutes	k__Bacteria;p__NKB19	k__Bacteria;p__OD1	k__Bacteria;p__OP1	k__Bacteria;p__OP8	k__Bacteria;p__OP9	k__Bacteria;p__Proteobacteria	k__Bacteria;p__SAR406	k__Bacteria;p__SR1	k__Bacteria;p__Spirochaetes	k__Bacteria;p__Synergistetes	k__Bacteria;p__TA06	k__Bacteria;p__TM6	k__Bacteria;p__TM7	k__Bacteria;p__Tenericutes	k__Bacteria;p__Thermotogae	k__Bacteria;p__Verrucomicrobia	k__Bacteria;p__WS6	k__Bacteria;p__WWE1	k__Bacteria;p__[Thermi]	Process Day	arsenite add.	plant no.	plant type
U341F-U806R-P1-NW4-1-14-40	562.0	23.0	5.0	26.0	294.0	1824.0	37.0	0.0	255.0	0.0	117.0	0.0	853.0	2.0	51.0	0.0	49.0	31.0	192.0	9.0	0.0	495.0	32.0	5.0	0.0	75.0	0.0	29.0	32.0	0.0	753.0	0.0	01	As0	#14	SSD
U341F-U806R-P1-NW4-1-14-41	1548.0	40.0	10.0	73.0	818.0	3733.0	137.0	33.0	651.0	8.0	332.0	0.0	2302.0	0.0	117.0	5.0	107.0	79.0	485.0	22.0	11.0	855.0	71.0	0.0	0.0	211.0	0.0	35.0	44.0	3.0	1396.0	0.0	01	As0	#14	SSD
U341F-U806R-P1-NW4-1-27-100	942.0	58.0	19.0	48.0	494.0	6077.0	323.0	0.0	1231.0	0.0	754.0	0.0	1300.0	0.0	324.0	13.0	163.0	102.0	147.0	37.0	0.0	1970.0	93.0	39.0	0.0	52.0	0.0	86.0	0.0	0.0	3363.0	0.0	15	As0	#14	SSD
U341F-U806R-P1-NW4-1-29-104	290.0	171.0	51.0	140.0	851.0	5806.0	454.0	0.0	788.0	4.0	343.0	0.0	3877.0	22.0	644.0	48.0	205.0	172.0	431.0	138.0	0.0	1749.0	175.0	58.0	3.0	83.0	0.0	172.0	0.0	0.0	3528.0	0.0	15	As30	#14	SSD
U341F-U806R-P1-NW4-1-31-108	257.0	22.0	0.0	16.0	334.0	3687.0	119.0	0.0	717.0	0.0	588.0	0.0	956.0	0.0	93.0	6.0	96.0	52.0	118.0	13.0	0.0	982.0	29.0	5.0	0.0	58.0	0.0	41.0	0.0	0.0	1544.0	0.0	15	As60	#14	SSD
U341F-U806R-P1-NW4-1-31-109	226.0	18.0	13.0	18.0	290.0	3374.0	213.0	0.0	1080.0	0.0	698.0	0.0	1123.0	0.0	119.0	0.0	152.0	99.0	100.0	11.0	0.0	762.0	22.0	15.0	0.0	65.0	0.0	45.0	0.0	4.0	1492.0	0.0	15	As60	#14	SSD
U341F-U806R-P1-NW4-1-33-79	346.0	30.0	0.0	0.0	22.0	3339.0	0.0	0.0	0.0	0.0	0.0	0.0	11990.0	0.0	0.0	0.0	0.0	50.0	37.0	0.0	0.0	11.0	197.0	0.0	0.0	0.0	379.0	844.0	0.0	0.0	9.0	0.0	01	As0	#01	Biogas
U341F-U806R-P1-NW4-1-33-80	177.0	16.0	0.0	0.0	14.0	2159.0	0.0	0.0	0.0	0.0	0.0	0.0	8325.0	0.0	0.0	0.0	0.0	56.0	0.0	0.0	0.0	0.0	167.0	0.0	0.0	0.0	188.0	688.0	0.0	0.0	0.0	0.0	01	As0	#01	Biogas
U341F-U806R-P1-NW4-1-34-82	117.0	28.0	0.0	0.0	0.0	1096.0	0.0	0.0	0.0	0.0	0.0	42.0	3117.0	0.0	0.0	0.0	0.0	18.0	0.0	0.0	8.0	0.0	55.0	0.0	0.0	0.0	130.0	355.0	0.0	0.0	0.0	0.0	15	As0	#01	Biogas
U341F-U806R-P1-NW4-1-34-83	192.0	55.0	0.0	0.0	23.0	1814.0	0.0	0.0	0.0	0.0	0.0	48.0	5720.0	0.0	0.0	0.0	0.0	44.0	0.0	0.0	11.0	0.0	119.0	0.0	0.0	0.0	269.0	570.0	0.0	0.0	0.0	0.0	15	As0	#01	Biogas
U341F-U806R-P1-NW4-1-36-88	173.0	56.0	0.0	0.0	0.0	1838.0	0.0	0.0	0.0	0.0	0.0	105.0	8307.0	0.0	0.0	0.0	0.0	54.0	0.0	0.0	0.0	0.0	128.0	0.0	0.0	0.0	376.0	536.0	0.0	0.0	10.0	0.0	15	As30	#01	Biogas
U341F-U806R-P1-NW4-1-36-89	295.0	61.0	0.0	0.0	41.0	2696.0	0.0	0.0	0.0	0.0	0.0	64.0	10521.0	0.0	0.0	0.0	0.0	43.0	0.0	0.0	0.0	4.0	188.0	0.0	0.0	0.0	333.0	1008.0	0.0	0.0	0.0	0.0	15	As30	#01	Biogas
U341F-U806R-P1-NW4-1-38-94	82.0	0.0	0.0	0.0	10.0	1218.0	0.0	0.0	0.0	0.0	0.0	12.0	3361.0	0.0	0.0	0.0	0.0	37.0	9.0	0.0	0.0	0.0	68.0	0.0	0.0	0.0	127.0	544.0	0.0	0.0	0.0	0.0	15	As60	#01	Biogas
U341F-U806R-P1-NW4-1-38-95	188.0	2.0	0.0	0.0	0.0	2566.0	0.0	0.0	0.0	0.0	0.0	24.0	4116.0	0.0	0.0	0.0	0.0	52.0	0.0	0.0	0.0	0.0	96.0	0.0	0.0	0.0	231.0	637.0	0.0	0.0	0.0	9.0	15	As60	#01	Biogas
