# Supplementary material for: Arsenic metabolism in technical biogas plants: possible consequences for resident microbiota and downstream units
Source: AMB Express. 2019 Nov 28;9:190. doi: 10.1186/s13568-019-0902-6 (PMC6882981; doi:10.1186/s13568-019-0902-6)
Supplement: Supplementary file 3 — Additional file 3. Additional electronic material (Qiime2 files). [file 13568_2019_902_MOESM3_ESM.qzv › efce6f8b-9ad8-46e7-a1e4-5087d1d706a9/data/level-2.jsonp]

load_data(2,["k__Archaea;p__Euryarchaeota", "k__Bacteria;__", "k__Bacteria;p__", "k__Bacteria;p__Acidobacteria", "k__Bacteria;p__Actinobacteria", "k__Bacteria;p__Bacteroidetes", "k__Bacteria;p__Caldiserica", "k__Bacteria;p__Chlorobi", "k__Bacteria;p__Chloroflexi", "k__Bacteria;p__Cyanobacteria", "k__Bacteria;p__EM3", "k__Bacteria;p__Fibrobacteres", "k__Bacteria;p__Firmicutes", "k__Bacteria;p__NKB19", "k__Bacteria;p__OD1", "k__Bacteria;p__OP1", "k__Bacteria;p__OP8", "k__Bacteria;p__OP9", "k__Bacteria;p__Proteobacteria", "k__Bacteria;p__SAR406", "k__Bacteria;p__SR1", "k__Bacteria;p__Spirochaetes", "k__Bacteria;p__Synergistetes", "k__Bacteria;p__TA06", "k__Bacteria;p__TM6", "k__Bacteria;p__TM7", "k__Bacteria;p__Tenericutes", "k__Bacteria;p__Thermotogae", "k__Bacteria;p__Verrucomicrobia", "k__Bacteria;p__WS6", "k__Bacteria;p__WWE1", "k__Bacteria;p__[Thermi]"],["index", "k__Archaea;p__Euryarchaeota", "k__Bacteria;__", "k__Bacteria;p__", "k__Bacteria;p__Acidobacteria", "k__Bacteria;p__Actinobacteria", "k__Bacteria;p__Bacteroidetes", "k__Bacteria;p__Caldiserica", "k__Bacteria;p__Chlorobi", "k__Bacteria;p__Chloroflexi", "k__Bacteria;p__Cyanobacteria", "k__Bacteria;p__EM3", "k__Bacteria;p__Fibrobacteres", "k__Bacteria;p__Firmicutes", "k__Bacteria;p__NKB19", "k__Bacteria;p__OD1", "k__Bacteria;p__OP1", "k__Bacteria;p__OP8", "k__Bacteria;p__OP9", "k__Bacteria;p__Proteobacteria", "k__Bacteria;p__SAR406", "k__Bacteria;p__SR1", "k__Bacteria;p__Spirochaetes", "k__Bacteria;p__Synergistetes", "k__Bacteria;p__TA06", "k__Bacteria;p__TM6", "k__Bacteria;p__TM7", "k__Bacteria;p__Tenericutes", "k__Bacteria;p__Thermotogae", "k__Bacteria;p__Verrucomicrobia", "k__Bacteria;p__WS6", "k__Bacteria;p__WWE1", "k__Bacteria;p__[Thermi]", "Process Day", "arsenite add.", "plant no.", "plant type"],[{"index":"U341F-U806R-P1-NW4-1-14-40","k__Archaea;p__Euryarchaeota":562.0,"k__Bacteria;__":23.0,"k__Bacteria;p__":5.0,"k__Bacteria;p__Acidobacteria":26.0,"k__Bacteria;p__Actinobacteria":294.0,"k__Bacteria;p__Bacteroidetes":1824.0,"k__Bacteria;p__Caldiserica":37.0,"k__Bacteria;p__Chlorobi":0.0,"k__Bacteria;p__Chloroflexi":255.0,"k__Bacteria;p__Cyanobacteria":0.0,"k__Bacteria;p__EM3":117.0,"k__Bacteria;p__Fibrobacteres":0.0,"k__Bacteria;p__Firmicutes":853.0,"k__Bacteria;p__NKB19":2.0,"k__Bacteria;p__OD1":51.0,"k__Bacteria;p__OP1":0.0,"k__Bacteria;p__OP8":49.0,"k__Bacteria;p__OP9":31.0,"k__Bacteria;p__Proteobacteria":192.0,"k__Bacteria;p__SAR406":9.0,"k__Bacteria;p__SR1":0.0,"k__Bacteria;p__Spirochaetes":495.0,"k__Bacteria;p__Synergistetes":32.0,"k__Bacteria;p__TA06":5.0,"k__Bacteria;p__TM6":0.0,"k__Bacteria;p__TM7":75.0,"k__Bacteria;p__Tenericutes":0.0,"k__Bacteria;p__Thermotogae":29.0,"k__Bacteria;p__Verrucomicrobia":32.0,"k__Bacteria;p__WS6":0.0,"k__Bacteria;p__WWE1":753.0,"k__Bacteria;p__[Thermi]":0.0,"Process Day":"01","arsenite add.":"As0","plant no.":"#14","plant type":"SSD"},{"index":"U341F-U806R-P1-NW4-1-14-41","k__Archaea;p__Euryarchaeota":1548.0,"k__Bacteria;__":40.0,"k__Bacteria;p__":10.0,"k__Bacteria;p__Acidobacteria":73.0,"k__Bacteria;p__Actinobacteria":818.0,"k__Bacteria;p__Bacteroidetes":3733.0,"k__Bacteria;p__Caldiserica":137.0,"k__Bacteria;p__Chlorobi":33.0,"k__Bacteria;p__Chloroflexi":651.0,"k__Bacteria;p__Cyanobacteria":8.0,"k__Bacteria;p__EM3":332.0,"k__Bacteria;p__Fibrobacteres":0.0,"k__Bacteria;p__Firmicutes":2302.0,"k__Bacteria;p__NKB19":0.0,"k__Bacteria;p__OD1":117.0,"k__Bacteria;p__OP1":5.0,"k__Bacteria;p__OP8":107.0,"k__Bacteria;p__OP9":79.0,"k__Bacteria;p__Proteobacteria":485.0,"k__Bacteria;p__SAR406":22.0,"k__Bacteria;p__SR1":11.0,"k__Bacteria;p__Spirochaetes":855.0,"k__Bacteria;p__Synergistetes":71.0,"k__Bacteria;p__TA06":0.0,"k__Bacteria;p__TM6":0.0,"k__Bacteria;p__TM7":211.0,"k__Bacteria;p__Tenericutes":0.0,"k__Bacteria;p__Thermotogae":35.0,"k__Bacteria;p__Verrucomicrobia":44.0,"k__Bacteria;p__WS6":3.0,"k__Bacteria;p__WWE1":1396.0,"k__Bacteria;p__[Thermi]":0.0,"Process Day":"01","arsenite add.":"As0","plant no.":"#14","plant type":"SSD"},{"index":"U341F-U806R-P1-NW4-1-27-100","k__Archaea;p__Euryarchaeota":942.0,"k__Bacteria;__":58.0,"k__Bacteria;p__":19.0,"k__Bacteria;p__Acidobacteria":48.0,"k__Bacteria;p__Actinobacteria":494.0,"k__Bacteria;p__Bacteroidetes":6077.0,"k__Bacteria;p__Caldiserica":323.0,"k__Bacteria;p__Chlorobi":0.0,"k__Bacteria;p__Chloroflexi":1231.0,"k__Bacteria;p__Cyanobacteria":0.0,"k__Bacteria;p__EM3":754.0,"k__Bacteria;p__Fibrobacteres":0.0,"k__Bacteria;p__Firmicutes":1300.0,"k__Bacteria;p__NKB19":0.0,"k__Bacteria;p__OD1":324.0,"k__Bacteria;p__OP1":13.0,"k__Bacteria;p__OP8":163.0,"k__Bacteria;p__OP9":102.0,"k__Bacteria;p__Proteobacteria":147.0,"k__Bacteria;p__SAR406":37.0,"k__Bacteria;p__SR1":0.0,"k__Bacteria;p__Spirochaetes":1970.0,"k__Bacteria;p__Synergistetes":93.0,"k__Bacteria;p__TA06":39.0,"k__Bacteria;p__TM6":0.0,"k__Bacteria;p__TM7":52.0,"k__Bacteria;p__Tenericutes":0.0,"k__Bacteria;p__Thermotogae":86.0,"k__Bacteria;p__Verrucomicrobia":0.0,"k__Bacteria;p__WS6":0.0,"k__Bacteria;p__WWE1":3363.0,"k__Bacteria;p__[Thermi]":0.0,"Process Day":"15","arsenite add.":"As0","plant no.":"#14","plant type":"SSD"},{"index":"U341F-U806R-P1-NW4-1-29-104","k__Archaea;p__Euryarchaeota":290.0,"k__Bacteria;__":171.0,"k__Bacteria;p__":51.0,"k__Bacteria;p__Acidobacteria":140.0,"k__Bacteria;p__Actinobacteria":851.0,"k__Bacteria;p__Bacteroidetes":5806.0,"k__Bacteria;p__Caldiserica":454.0,"k__Bacteria;p__Chlorobi":0.0,"k__Bacteria;p__Chloroflexi":788.0,"k__Bacteria;p__Cyanobacteria":4.0,"k__Bacteria;p__EM3":343.0,"k__Bacteria;p__Fibrobacteres":0.0,"k__Bacteria;p__Firmicutes":3877.0,"k__Bacteria;p__NKB19":22.0,"k__Bacteria;p__OD1":644.0,"k__Bacteria;p__OP1":48.0,"k__Bacteria;p__OP8":205.0,"k__Bacteria;p__OP9":172.0,"k__Bacteria;p__Proteobacteria":431.0,"k__Bacteria;p__SAR406":138.0,"k__Bacteria;p__SR1":0.0,"k__Bacteria;p__Spirochaetes":1749.0,"k__Bacteria;p__Synergistetes":175.0,"k__Bacteria;p__TA06":58.0,"k__Bacteria;p__TM6":3.0,"k__Bacteria;p__TM7":83.0,"k__Bacteria;p__Tenericutes":0.0,"k__Bacteria;p__Thermotogae":172.0,"k__Bacteria;p__Verrucomicrobia":0.0,"k__Bacteria;p__WS6":0.0,"k__Bacteria;p__WWE1":3528.0,"k__Bacteria;p__[Thermi]":0.0,"Process Day":"15","arsenite add.":"As30","plant no.":"#14","plant type":"SSD"},{"index":"U341F-U806R-P1-NW4-1-31-108","k__Archaea;p__Euryarchaeota":257.0,"k__Bacteria;__":22.0,"k__Bacteria;p__":0.0,"k__Bacteria;p__Acidobacteria":16.0,"k__Bacteria;p__Actinobacteria":334.0,"k__Bacteria;p__Bacteroidetes":3687.0,"k__Bacteria;p__Caldiserica":119.0,"k__Bacteria;p__Chlorobi":0.0,"k__Bacteria;p__Chloroflexi":717.0,"k__Bacteria;p__Cyanobacteria":0.0,"k__Bacteria;p__EM3":588.0,"k__Bacteria;p__Fibrobacteres":0.0,"k__Bacteria;p__Firmicutes":956.0,"k__Bacteria;p__NKB19":0.0,"k__Bacteria;p__OD1":93.0,"k__Bacteria;p__OP1":6.0,"k__Bacteria;p__OP8":96.0,"k__Bacteria;p__OP9":52.0,"k__Bacteria;p__Proteobacteria":118.0,"k__Bacteria;p__SAR406":13.0,"k__Bacteria;p__SR1":0.0,"k__Bacteria;p__Spirochaetes":982.0,"k__Bacteria;p__Synergistetes":29.0,"k__Bacteria;p__TA06":5.0,"k__Bacteria;p__TM6":0.0,"k__Bacteria;p__TM7":58.0,"k__Bacteria;p__Tenericutes":0.0,"k__Bacteria;p__Thermotogae":41.0,"k__Bacteria;p__Verrucomicrobia":0.0,"k__Bacteria;p__WS6":0.0,"k__Bacteria;p__WWE1":1544.0,"k__Bacteria;p__[Thermi]":0.0,"Process Day":"15","arsenite add.":"As60","plant no.":"#14","plant type":"SSD"},{"index":"U341F-U806R-P1-NW4-1-31-109","k__Archaea;p__Euryarchaeota":226.0,"k__Bacteria;__":18.0,"k__Bacteria;p__":13.0,"k__Bacteria;p__Acidobacteria":18.0,"k__Bacteria;p__Actinobacteria":290.0,"k__Bacteria;p__Bacteroidetes":3374.0,"k__Bacteria;p__Caldiserica":213.0,"k__Bacteria;p__Chlorobi":0.0,"k__Bacteria;p__Chloroflexi":1080.0,"k__Bacteria;p__Cyanobacteria":0.0,"k__Bacteria;p__EM3":698.0,"k__Bacteria;p__Fibrobacteres":0.0,"k__Bacteria;p__Firmicutes":1123.0,"k__Bacteria;p__NKB19":0.0,"k__Bacteria;p__OD1":119.0,"k__Bacteria;p__OP1":0.0,"k__Bacteria;p__OP8":152.0,"k__Bacteria;p__OP9":99.0,"k__Bacteria;p__Proteobacteria":100.0,"k__Bacteria;p__SAR406":11.0,"k__Bacteria;p__SR1":0.0,"k__Bacteria;p__Spirochaetes":762.0,"k__Bacteria;p__Synergistetes":22.0,"k__Bacteria;p__TA06":15.0,"k__Bacteria;p__TM6":0.0,"k__Bacteria;p__TM7":65.0,"k__Bacteria;p__Tenericutes":0.0,"k__Bacteria;p__Thermotogae":45.0,"k__Bacteria;p__Verrucomicrobia":0.0,"k__Bacteria;p__WS6":4.0,"k__Bacteria;p__WWE1":1492.0,"k__Bacteria;p__[Thermi]":0.0,"Process Day":"15","arsenite add.":"As60","plant no.":"#14","plant type":"SSD"},{"index":"U341F-U806R-P1-NW4-1-33-79","k__Archaea;p__Euryarchaeota":346.0,"k__Bacteria;__":30.0,"k__Bacteria;p__":0.0,"k__Bacteria;p__Acidobacteria":0.0,"k__Bacteria;p__Actinobacteria":22.0,"k__Bacteria;p__Bacteroidetes":3339.0,"k__Bacteria;p__Caldiserica":0.0,"k__Bacteria;p__Chlorobi":0.0,"k__Bacteria;p__Chloroflexi":0.0,"k__Bacteria;p__Cyanobacteria":0.0,"k__Bacteria;p__EM3":0.0,"k__Bacteria;p__Fibrobacteres":0.0,"k__Bacteria;p__Firmicutes":11990.0,"k__Bacteria;p__NKB19":0.0,"k__Bacteria;p__OD1":0.0,"k__Bacteria;p__OP1":0.0,"k__Bacteria;p__OP8":0.0,"k__Bacteria;p__OP9":50.0,"k__Bacteria;p__Proteobacteria":37.0,"k__Bacteria;p__SAR406":0.0,"k__Bacteria;p__SR1":0.0,"k__Bacteria;p__Spirochaetes":11.0,"k__Bacteria;p__Synergistetes":197.0,"k__Bacteria;p__TA06":0.0,"k__Bacteria;p__TM6":0.0,"k__Bacteria;p__TM7":0.0,"k__Bacteria;p__Tenericutes":379.0,"k__Bacteria;p__Thermotogae":844.0,"k__Bacteria;p__Verrucomicrobia":0.0,"k__Bacteria;p__WS6":0.0,"k__Bacteria;p__WWE1":9.0,"k__Bacteria;p__[Thermi]":0.0,"Process Day":"01","arsenite add.":"As0","plant no.":"#01","plant type":"Biogas"},{"index":"U341F-U806R-P1-NW4-1-33-80","k__Archaea;p__Euryarchaeota":177.0,"k__Bacteria;__":16.0,"k__Bacteria;p__":0.0,"k__Bacteria;p__Acidobacteria":0.0,"k__Bacteria;p__Actinobacteria":14.0,"k__Bacteria;p__Bacteroidetes":2159.0,"k__Bacteria;p__Caldiserica":0.0,"k__Bacteria;p__Chlorobi":0.0,"k__Bacteria;p__Chloroflexi":0.0,"k__Bacteria;p__Cyanobacteria":0.0,"k__Bacteria;p__EM3":0.0,"k__Bacteria;p__Fibrobacteres":0.0,"k__Bacteria;p__Firmicutes":8325.0,"k__Bacteria;p__NKB19":0.0,"k__Bacteria;p__OD1":0.0,"k__Bacteria;p__OP1":0.0,"k__Bacteria;p__OP8":0.0,"k__Bacteria;p__OP9":56.0,"k__Bacteria;p__Proteobacteria":0.0,"k__Bacteria;p__SAR406":0.0,"k__Bacteria;p__SR1":0.0,"k__Bacteria;p__Spirochaetes":0.0,"k__Bacteria;p__Synergistetes":167.0,"k__Bacteria;p__TA06":0.0,"k__Bacteria;p__TM6":0.0,"k__Bacteria;p__TM7":0.0,"k__Bacteria;p__Tenericutes":188.0,"k__Bacteria;p__Thermotogae":688.0,"k__Bacteria;p__Verrucomicrobia":0.0,"k__Bacteria;p__WS6":0.0,"k__Bacteria;p__WWE1":0.0,"k__Bacteria;p__[Thermi]":0.0,"Process Day":"01","arsenite add.":"As0","plant no.":"#01","plant type":"Biogas"},{"index":"U341F-U806R-P1-NW4-1-34-82","k__Archaea;p__Euryarchaeota":117.0,"k__Bacteria;__":28.0,"k__Bacteria;p__":0.0,"k__Bacteria;p__Acidobacteria":0.0,"k__Bacteria;p__Actinobacteria":0.0,"k__Bacteria;p__Bacteroidetes":1096.0,"k__Bacteria;p__Caldiserica":0.0,"k__Bacteria;p__Chlorobi":0.0,"k__Bacteria;p__Chloroflexi":0.0,"k__Bacteria;p__Cyanobacteria":0.0,"k__Bacteria;p__EM3":0.0,"k__Bacteria;p__Fibrobacteres":42.0,"k__Bacteria;p__Firmicutes":3117.0,"k__Bacteria;p__NKB19":0.0,"k__Bacteria;p__OD1":0.0,"k__Bacteria;p__OP1":0.0,"k__Bacteria;p__OP8":0.0,"k__Bacteria;p__OP9":18.0,"k__Bacteria;p__Proteobacteria":0.0,"k__Bacteria;p__SAR406":0.0,"k__Bacteria;p__SR1":8.0,"k__Bacteria;p__Spirochaetes":0.0,"k__Bacteria;p__Synergistetes":55.0,"k__Bacteria;p__TA06":0.0,"k__Bacteria;p__TM6":0.0,"k__Bacteria;p__TM7":0.0,"k__Bacteria;p__Tenericutes":130.0,"k__Bacteria;p__Thermotogae":355.0,"k__Bacteria;p__Verrucomicrobia":0.0,"k__Bacteria;p__WS6":0.0,"k__Bacteria;p__WWE1":0.0,"k__Bacteria;p__[Thermi]":0.0,"Process Day":"15","arsenite add.":"As0","plant no.":"#01","plant type":"Biogas"},{"index":"U341F-U806R-P1-NW4-1-34-83","k__Archaea;p__Euryarchaeota":192.0,"k__Bacteria;__":55.0,"k__Bacteria;p__":0.0,"k__Bacteria;p__Acidobacteria":0.0,"k__Bacteria;p__Actinobacteria":23.0,"k__Bacteria;p__Bacteroidetes":1814.0,"k__Bacteria;p__Caldiserica":0.0,"k__Bacteria;p__Chlorobi":0.0,"k__Bacteria;p__Chloroflexi":0.0,"k__Bacteria;p__Cyanobacteria":0.0,"k__Bacteria;p__EM3":0.0,"k__Bacteria;p__Fibrobacteres":48.0,"k__Bacteria;p__Firmicutes":5720.0,"k__Bacteria;p__NKB19":0.0,"k__Bacteria;p__OD1":0.0,"k__Bacteria;p__OP1":0.0,"k__Bacteria;p__OP8":0.0,"k__Bacteria;p__OP9":44.0,"k__Bacteria;p__Proteobacteria":0.0,"k__Bacteria;p__SAR406":0.0,"k__Bacteria;p__SR1":11.0,"k__Bacteria;p__Spirochaetes":0.0,"k__Bacteria;p__Synergistetes":119.0,"k__Bacteria;p__TA06":0.0,"k__Bacteria;p__TM6":0.0,"k__Bacteria;p__TM7":0.0,"k__Bacteria;p__Tenericutes":269.0,"k__Bacteria;p__Thermotogae":570.0,"k__Bacteria;p__Verrucomicrobia":0.0,"k__Bacteria;p__WS6":0.0,"k__Bacteria;p__WWE1":0.0,"k__Bacteria;p__[Thermi]":0.0,"Process Day":"15","arsenite add.":"As0","plant no.":"#01","plant type":"Biogas"},{"index":"U341F-U806R-P1-NW4-1-36-88","k__Archaea;p__Euryarchaeota":173.0,"k__Bacteria;__":56.0,"k__Bacteria;p__":0.0,"k__Bacteria;p__Acidobacteria":0.0,"k__Bacteria;p__Actinobacteria":0.0,"k__Bacteria;p__Bacteroidetes":1838.0,"k__Bacteria;p__Caldiserica":0.0,"k__Bacteria;p__Chlorobi":0.0,"k__Bacteria;p__Chloroflexi":0.0,"k__Bacteria;p__Cyanobacteria":0.0,"k__Bacteria;p__EM3":0.0,"k__Bacteria;p__Fibrobacteres":105.0,"k__Bacteria;p__Firmicutes":8307.0,"k__Bacteria;p__NKB19":0.0,"k__Bacteria;p__OD1":0.0,"k__Bacteria;p__OP1":0.0,"k__Bacteria;p__OP8":0.0,"k__Bacteria;p__OP9":54.0,"k__Bacteria;p__Proteobacteria":0.0,"k__Bacteria;p__SAR406":0.0,"k__Bacteria;p__SR1":0.0,"k__Bacteria;p__Spirochaetes":0.0,"k__Bacteria;p__Synergistetes":128.0,"k__Bacteria;p__TA06":0.0,"k__Bacteria;p__TM6":0.0,"k__Bacteria;p__TM7":0.0,"k__Bacteria;p__Tenericutes":376.0,"k__Bacteria;p__Thermotogae":536.0,"k__Bacteria;p__Verrucomicrobia":0.0,"k__Bacteria;p__WS6":0.0,"k__Bacteria;p__WWE1":10.0,"k__Bacteria;p__[Thermi]":0.0,"Process Day":"15","arsenite add.":"As30","plant no.":"#01","plant type":"Biogas"},{"index":"U341F-U806R-P1-NW4-1-36-89","k__Archaea;p__Euryarchaeota":295.0,"k__Bacteria;__":61.0,"k__Bacteria;p__":0.0,"k__Bacteria;p__Acidobacteria":0.0,"k__Bacteria;p__Actinobacteria":41.0,"k__Bacteria;p__Bacteroidetes":2696.0,"k__Bacteria;p__Caldiserica":0.0,"k__Bacteria;p__Chlorobi":0.0,"k__Bacteria;p__Chloroflexi":0.0,"k__Bacteria;p__Cyanobacteria":0.0,"k__Bacteria;p__EM3":0.0,"k__Bacteria;p__Fibrobacteres":64.0,"k__Bacteria;p__Firmicutes":10521.0,"k__Bacteria;p__NKB19":0.0,"k__Bacteria;p__OD1":0.0,"k__Bacteria;p__OP1":0.0,"k__Bacteria;p__OP8":0.0,"k__Bacteria;p__OP9":43.0,"k__Bacteria;p__Proteobacteria":0.0,"k__Bacteria;p__SAR406":0.0,"k__Bacteria;p__SR1":0.0,"k__Bacteria;p__Spirochaetes":4.0,"k__Bacteria;p__Synergistetes":188.0,"k__Bacteria;p__TA06":0.0,"k__Bacteria;p__TM6":0.0,"k__Bacteria;p__TM7":0.0,"k__Bacteria;p__Tenericutes":333.0,"k__Bacteria;p__Thermotogae":1008.0,"k__Bacteria;p__Verrucomicrobia":0.0,"k__Bacteria;p__WS6":0.0,"k__Bacteria;p__WWE1":0.0,"k__Bacteria;p__[Thermi]":0.0,"Process Day":"15","arsenite add.":"As30","plant no.":"#01","plant type":"Biogas"},{"index":"U341F-U806R-P1-NW4-1-38-94","k__Archaea;p__Euryarchaeota":82.0,"k__Bacteria;__":0.0,"k__Bacteria;p__":0.0,"k__Bacteria;p__Acidobacteria":0.0,"k__Bacteria;p__Actinobacteria":10.0,"k__Bacteria;p__Bacteroidetes":1218.0,"k__Bacteria;p__Caldiserica":0.0,"k__Bacteria;p__Chlorobi":0.0,"k__Bacteria;p__Chloroflexi":0.0,"k__Bacteria;p__Cyanobacteria":0.0,"k__Bacteria;p__EM3":0.0,"k__Bacteria;p__Fibrobacteres":12.0,"k__Bacteria;p__Firmicutes":3361.0,"k__Bacteria;p__NKB19":0.0,"k__Bacteria;p__OD1":0.0,"k__Bacteria;p__OP1":0.0,"k__Bacteria;p__OP8":0.0,"k__Bacteria;p__OP9":37.0,"k__Bacteria;p__Proteobacteria":9.0,"k__Bacteria;p__SAR406":0.0,"k__Bacteria;p__SR1":0.0,"k__Bacteria;p__Spirochaetes":0.0,"k__Bacteria;p__Synergistetes":68.0,"k__Bacteria;p__TA06":0.0,"k__Bacteria;p__TM6":0.0,"k__Bacteria;p__TM7":0.0,"k__Bacteria;p__Tenericutes":127.0,"k__Bacteria;p__Thermotogae":544.0,"k__Bacteria;p__Verrucomicrobia":0.0,"k__Bacteria;p__WS6":0.0,"k__Bacteria;p__WWE1":0.0,"k__Bacteria;p__[Thermi]":0.0,"Process Day":"15","arsenite add.":"As60","plant no.":"#01","plant type":"Biogas"},{"index":"U341F-U806R-P1-NW4-1-38-95","k__Archaea;p__Euryarchaeota":188.0,"k__Bacteria;__":2.0,"k__Bacteria;p__":0.0,"k__Bacteria;p__Acidobacteria":0.0,"k__Bacteria;p__Actinobacteria":0.0,"k__Bacteria;p__Bacteroidetes":2566.0,"k__Bacteria;p__Caldiserica":0.0,"k__Bacteria;p__Chlorobi":0.0,"k__Bacteria;p__Chloroflexi":0.0,"k__Bacteria;p__Cyanobacteria":0.0,"k__Bacteria;p__EM3":0.0,"k__Bacteria;p__Fibrobacteres":24.0,"k__Bacteria;p__Firmicutes":4116.0,"k__Bacteria;p__NKB19":0.0,"k__Bacteria;p__OD1":0.0,"k__Bacteria;p__OP1":0.0,"k__Bacteria;p__OP8":0.0,"k__Bacteria;p__OP9":52.0,"k__Bacteria;p__Proteobacteria":0.0,"k__Bacteria;p__SAR406":0.0,"k__Bacteria;p__SR1":0.0,"k__Bacteria;p__Spirochaetes":0.0,"k__Bacteria;p__Synergistetes":96.0,"k__Bacteria;p__TA06":0.0,"k__Bacteria;p__TM6":0.0,"k__Bacteria;p__TM7":0.0,"k__Bacteria;p__Tenericutes":231.0,"k__Bacteria;p__Thermotogae":637.0,"k__Bacteria;p__Verrucomicrobia":0.0,"k__Bacteria;p__WS6":0.0,"k__Bacteria;p__WWE1":0.0,"k__Bacteria;p__[Thermi]":9.0,"Process Day":"15","arsenite add.":"As60","plant no.":"#01","plant type":"Biogas"}]);
