# Supplementary material for: Arsenic metabolism in technical biogas plants: possible consequences for resident microbiota and downstream units
Source: AMB Express. 2019 Nov 28;9:190. doi: 10.1186/s13568-019-0902-6 (PMC6882981; doi:10.1186/s13568-019-0902-6)
Supplement: Supplementary file 3 — Additional file 3. Additional electronic material (Qiime2 files). [file 13568_2019_902_MOESM3_ESM.qzv › efce6f8b-9ad8-46e7-a1e4-5087d1d706a9/data/level-3.csv]

index	k__Archaea;p__Euryarchaeota;c__Methanobacteria	k__Archaea;p__Euryarchaeota;c__Methanomicrobia	k__Archaea;p__Euryarchaeota;c__Thermoplasmata	k__Bacteria;__;__	k__Bacteria;p__;c__	k__Bacteria;p__Acidobacteria;c__BPC102	k__Bacteria;p__Acidobacteria;c__Sva0725	k__Bacteria;p__Acidobacteria;c__[Chloracidobacteria]	k__Bacteria;p__Actinobacteria;c__	k__Bacteria;p__Actinobacteria;c__Acidimicrobiia	k__Bacteria;p__Actinobacteria;c__Actinobacteria	k__Bacteria;p__Actinobacteria;c__Thermoleophilia	k__Bacteria;p__Bacteroidetes;__	k__Bacteria;p__Bacteroidetes;c__Bacteroidia	k__Bacteria;p__Bacteroidetes;c__Cytophagia	k__Bacteria;p__Bacteroidetes;c__Flavobacteriia	k__Bacteria;p__Bacteroidetes;c__Sphingobacteriia	k__Bacteria;p__Bacteroidetes;c__[Saprospirae]	k__Bacteria;p__Caldiserica;c__OP5	k__Bacteria;p__Caldiserica;c__TTA-B1	k__Bacteria;p__Chlorobi;c__SJA-28	k__Bacteria;p__Chloroflexi;c__	k__Bacteria;p__Chloroflexi;c__Anaerolineae	k__Bacteria;p__Chloroflexi;c__Ellin6529	k__Bacteria;p__Chloroflexi;c__SHA-26	k__Bacteria;p__Cyanobacteria;c__4C0d-2	k__Bacteria;p__Cyanobacteria;c__Chloroplast	k__Bacteria;p__EM3;c__	k__Bacteria;p__Fibrobacteres;c__TG3	k__Bacteria;p__Firmicutes;c__Bacilli	k__Bacteria;p__Firmicutes;c__Clostridia	k__Bacteria;p__Firmicutes;c__Erysipelotrichi	k__Bacteria;p__Firmicutes;c__OPB54	k__Bacteria;p__NKB19;__	k__Bacteria;p__NKB19;c__TSBW08	k__Bacteria;p__OD1;c__	k__Bacteria;p__OD1;c__ABY1	k__Bacteria;p__OP1;c__OPB14	k__Bacteria;p__OP8;c__OP8_1	k__Bacteria;p__OP9;c__JS1	k__Bacteria;p__OP9;c__OPB46	k__Bacteria;p__Proteobacteria;__	k__Bacteria;p__Proteobacteria;c__Alphaproteobacteria	k__Bacteria;p__Proteobacteria;c__Betaproteobacteria	k__Bacteria;p__Proteobacteria;c__Deltaproteobacteria	k__Bacteria;p__Proteobacteria;c__Epsilonproteobacteria	k__Bacteria;p__Proteobacteria;c__Gammaproteobacteria	k__Bacteria;p__SAR406;c__AB16	k__Bacteria;p__SR1;c__
U341F-U806R-P1-NW4-1-14-40	25.0	537.0	0.0	23.0	5.0	0.0	26.0	0.0	13.0	63.0	218.0	0.0	85.0	1671.0	0.0	0.0	10.0	58.0	14.0	23.0	0.0	15.0	240.0	0.0	0.0	0.0	0.0	117.0	0.0	40.0	813.0	0.0	0.0	0.0	2.0	35.0	16.0	0.0	49.0	0.0	31.0	0.0	15.0	92.0	74.0	11.0	0.0	9.0	0.0
U341F-U806R-P1-NW4-1-14-41	51.0	1497.0	0.0	40.0	10.0	13.0	54.0	6.0	14.0	170.0	614.0	20.0	133.0	3457.0	0.0	30.0	0.0	113.0	66.0	71.0	33.0	0.0	644.0	7.0	0.0	8.0	0.0	332.0	0.0	76.0	2226.0	0.0	0.0	0.0	0.0	105.0	12.0	5.0	107.0	9.0	70.0	0.0	139.0	156.0	112.0	18.0	60.0	22.0	11.0
U341F-U806R-P1-NW4-1-27-100	17.0	910.0	15.0	58.0	19.0	13.0	35.0	0.0	54.0	47.0	370.0	23.0	115.0	5956.0	0.0	6.0	0.0	0.0	136.0	187.0	0.0	0.0	1231.0	0.0	0.0	0.0	0.0	754.0	0.0	13.0	1287.0	0.0	0.0	0.0	0.0	324.0	0.0	13.0	163.0	26.0	76.0	0.0	37.0	61.0	49.0	0.0	0.0	37.0	0.0
U341F-U806R-P1-NW4-1-29-104	0.0	280.0	10.0	171.0	51.0	6.0	134.0	0.0	93.0	72.0	623.0	63.0	321.0	5467.0	0.0	15.0	0.0	3.0	134.0	320.0	0.0	0.0	783.0	0.0	5.0	0.0	4.0	343.0	0.0	44.0	3833.0	0.0	0.0	8.0	14.0	624.0	20.0	48.0	205.0	43.0	129.0	4.0	45.0	228.0	114.0	0.0	40.0	138.0	0.0
U341F-U806R-P1-NW4-1-31-108	0.0	257.0	0.0	22.0	0.0	0.0	16.0	0.0	15.0	38.0	254.0	27.0	80.0	3601.0	0.0	6.0	0.0	0.0	56.0	63.0	0.0	0.0	717.0	0.0	0.0	0.0	0.0	588.0	0.0	0.0	956.0	0.0	0.0	0.0	0.0	93.0	0.0	6.0	96.0	8.0	44.0	0.0	10.0	43.0	36.0	0.0	29.0	13.0	0.0
U341F-U806R-P1-NW4-1-31-109	0.0	226.0	0.0	18.0	13.0	0.0	18.0	0.0	14.0	37.0	213.0	26.0	58.0	3316.0	0.0	0.0	0.0	0.0	66.0	147.0	0.0	0.0	1080.0	0.0	0.0	0.0	0.0	698.0	0.0	0.0	1123.0	0.0	0.0	0.0	0.0	114.0	5.0	0.0	152.0	17.0	82.0	0.0	25.0	53.0	22.0	0.0	0.0	11.0	0.0
U341F-U806R-P1-NW4-1-33-79	87.0	250.0	9.0	30.0	0.0	0.0	0.0	0.0	0.0	0.0	22.0	0.0	1934.0	1147.0	258.0	0.0	0.0	0.0	0.0	0.0	0.0	0.0	0.0	0.0	0.0	0.0	0.0	0.0	0.0	82.0	11829.0	0.0	79.0	0.0	0.0	0.0	0.0	0.0	0.0	0.0	50.0	0.0	37.0	0.0	0.0	0.0	0.0	0.0	0.0
U341F-U806R-P1-NW4-1-33-80	52.0	125.0	0.0	16.0	0.0	0.0	0.0	0.0	0.0	0.0	14.0	0.0	1241.0	765.0	153.0	0.0	0.0	0.0	0.0	0.0	0.0	0.0	0.0	0.0	0.0	0.0	0.0	0.0	0.0	74.0	8178.0	6.0	67.0	0.0	0.0	0.0	0.0	0.0	0.0	0.0	56.0	0.0	0.0	0.0	0.0	0.0	0.0	0.0	0.0
U341F-U806R-P1-NW4-1-34-82	27.0	90.0	0.0	28.0	0.0	0.0	0.0	0.0	0.0	0.0	0.0	0.0	492.0	604.0	0.0	0.0	0.0	0.0	0.0	0.0	0.0	0.0	0.0	0.0	0.0	0.0	0.0	0.0	42.0	16.0	3068.0	0.0	33.0	0.0	0.0	0.0	0.0	0.0	0.0	0.0	18.0	0.0	0.0	0.0	0.0	0.0	0.0	0.0	8.0
U341F-U806R-P1-NW4-1-34-83	49.0	143.0	0.0	55.0	0.0	0.0	0.0	0.0	0.0	0.0	23.0	0.0	745.0	962.0	107.0	0.0	0.0	0.0	0.0	0.0	0.0	0.0	0.0	0.0	0.0	0.0	0.0	0.0	48.0	16.0	5627.0	0.0	77.0	0.0	0.0	0.0	0.0	0.0	0.0	0.0	44.0	0.0	0.0	0.0	0.0	0.0	0.0	0.0	11.0
U341F-U806R-P1-NW4-1-36-88	20.0	145.0	8.0	56.0	0.0	0.0	0.0	0.0	0.0	0.0	0.0	0.0	903.0	826.0	109.0	0.0	0.0	0.0	0.0	0.0	0.0	0.0	0.0	0.0	0.0	0.0	0.0	0.0	105.0	53.0	8108.0	0.0	146.0	0.0	0.0	0.0	0.0	0.0	0.0	0.0	54.0	0.0	0.0	0.0	0.0	0.0	0.0	0.0	0.0
U341F-U806R-P1-NW4-1-36-89	20.0	269.0	6.0	61.0	0.0	0.0	0.0	0.0	0.0	0.0	41.0	0.0	1457.0	1048.0	191.0	0.0	0.0	0.0	0.0	0.0	0.0	0.0	0.0	0.0	0.0	0.0	0.0	0.0	64.0	42.0	10338.0	0.0	141.0	0.0	0.0	0.0	0.0	0.0	0.0	0.0	43.0	0.0	0.0	0.0	0.0	0.0	0.0	0.0	0.0
U341F-U806R-P1-NW4-1-38-94	0.0	82.0	0.0	0.0	0.0	0.0	0.0	0.0	0.0	0.0	10.0	0.0	657.0	469.0	92.0	0.0	0.0	0.0	0.0	0.0	0.0	0.0	0.0	0.0	0.0	0.0	0.0	0.0	12.0	47.0	3269.0	0.0	45.0	0.0	0.0	0.0	0.0	0.0	0.0	0.0	37.0	0.0	9.0	0.0	0.0	0.0	0.0	0.0	0.0
U341F-U806R-P1-NW4-1-38-95	10.0	178.0	0.0	2.0	0.0	0.0	0.0	0.0	0.0	0.0	0.0	0.0	1279.0	1128.0	159.0	0.0	0.0	0.0	0.0	0.0	0.0	0.0	0.0	0.0	0.0	0.0	0.0	0.0	24.0	28.0	4009.0	0.0	79.0	0.0	0.0	0.0	0.0	0.0	0.0	0.0	52.0	0.0	0.0	0.0	0.0	0.0	0.0	0.0	0.0
[truncated: 20 more columns]
