# Supplementary material for: Arsenic metabolism in technical biogas plants: possible consequences for resident microbiota and downstream units
Source: AMB Express. 2019 Nov 28;9:190. doi: 10.1186/s13568-019-0902-6 (PMC6882981; doi:10.1186/s13568-019-0902-6)
Supplement: Supplementary file 3 — Additional file 3. Additional electronic material (Qiime2 files). [file 13568_2019_902_MOESM3_ESM.qzv › efce6f8b-9ad8-46e7-a1e4-5087d1d706a9/data/level-3.jsonp]

load_data(3,["k__Archaea;p__Euryarchaeota;c__Methanobacteria", "k__Archaea;p__Euryarchaeota;c__Methanomicrobia", "k__Archaea;p__Euryarchaeota;c__Thermoplasmata", "k__Bacteria;__;__", "k__Bacteria;p__;c__", "k__Bacteria;p__Acidobacteria;c__BPC102", "k__Bacteria;p__Acidobacteria;c__Sva0725", "k__Bacteria;p__Acidobacteria;c__[Chloracidobacteria]", "k__Bacteria;p__Actinobacteria;c__", "k__Bacteria;p__Actinobacteria;c__Acidimicrobiia", "k__Bacteria;p__Actinobacteria;c__Actinobacteria", "k__Bacteria;p__Actinobacteria;c__Thermoleophilia", "k__Bacteria;p__Bacteroidetes;__", "k__Bacteria;p__Bacteroidetes;c__Bacteroidia", "k__Bacteria;p__Bacteroidetes;c__Cytophagia", "k__Bacteria;p__Bacteroidetes;c__Flavobacteriia", "k__Bacteria;p__Bacteroidetes;c__Sphingobacteriia", "k__Bacteria;p__Bacteroidetes;c__[Saprospirae]", "k__Bacteria;p__Caldiserica;c__OP5", "k__Bacteria;p__Caldiserica;c__TTA-B1", "k__Bacteria;p__Chlorobi;c__SJA-28", "k__Bacteria;p__Chloroflexi;c__", "k__Bacteria;p__Chloroflexi;c__Anaerolineae", "k__Bacteria;p__Chloroflexi;c__Ellin6529", "k__Bacteria;p__Chloroflexi;c__SHA-26", "k__Bacteria;p__Cyanobacteria;c__4C0d-2", "k__Bacteria;p__Cyanobacteria;c__Chloroplast", "k__Bacteria;p__EM3;c__", "k__Bacteria;p__Fibrobacteres;c__TG3", "k__Bacteria;p__Firmicutes;c__Bacilli", "k__Bacteria;p__Firmicutes;c__Clostridia", "k__Bacteria;p__Firmicutes;c__Erysipelotrichi", "k__Bacteria;p__Firmicutes;c__OPB54", "k__Bacteria;p__NKB19;__", "k__Bacteria;p__NKB19;c__TSBW08", "k__Bacteria;p__OD1;c__", "k__Bacteria;p__OD1;c__ABY1", "k__Bacteria;p__OP1;c__OPB14", "k__Bacteria;p__OP8;c__OP8_1", "k__Bacteria;p__OP9;c__JS1", "k__Bacteria;p__OP9;c__OPB46", "k__Bacteria;p__Proteobacteria;__", "k__Bacteria;p__Proteobacteria;c__Alphaproteobacteria", "k__Bacteria;p__Proteobacteria;c__Betaproteobacteria", "k__Bacteria;p__Proteobacteria;c__Deltaproteobacteria", "k__Bacteria;p__Proteobacteria;c__Epsilonproteobacteria", "k__Bacteria;p__Proteobacteria;c__Gammaproteobacteria", "k__Bacteria;p__SAR406;c__AB16", "k__Bacteria;p__SR1;c__", "k__Bacteria;p__Spirochaetes;c__Spirochaetes", "k__Bacteria;p__Spirochaetes;c__[Brachyspirae]", "k__Bacteria;p__Spirochaetes;c__[Leptospirae]", "k__Bacteria;p__Synergistetes;c__Synergistia", "k__Bacteria;p__TA06;c__", "k__Bacteria;p__TM6;c__SJA-4", "k__Bacteria;p__TM7;c__TM7-1", "k__Bacteria;p__TM7;c__TM7-3", "k__Bacteria;p__Tenericutes;c__Mollicutes", "k__Bacteria;p__Tenericutes;c__RF3", "k__Bacteria;p__Thermotogae;c__Thermotogae", "k__Bacteria;p__Verrucomicrobia;c__Verruco-5", "k__Bacteria;p__Verrucomicrobia;c__[Pedosphaerae]", "k__Bacteria;p__WS6;c__SC72", "k__Bacteria;p__WWE1;c__[Cloacamonae]", "k__Bacteria;p__[Thermi];c__Deinococci"],["index", "k__Archaea;p__Euryarchaeota;c__Methanobacteria", "k__Archaea;p__Euryarchaeota;c__Methanomicrobia", "k__Archaea;p__Euryarchaeota;c__Thermoplasmata", "k__Bacteria;__;__", "k__Bacteria;p__;c__", "k__Bacteria;p__Acidobacteria;c__BPC102", "k__Bacteria;p__Acidobacteria;c__Sva0725", "k__Bacteria;p__Acidobacteria;c__[Chloracidobacteria]", "k__Bacteria;p__Actinobacteria;c__", "k__Bacteria;p__Actinobacteria;c__Acidimicrobiia", "k__Bacteria;p__Actinobacteria;c__Actinobacteria", "k__Bacteria;p__Actinobacteria;c__Thermoleophilia", "k__Bacteria;p__Bacteroidetes;__", "k__Bacteria;p__Bacteroidetes;c__Bacteroidia", "k__Bacteria;p__Bacteroidetes;c__Cytophagia", "k__Bacteria;p__Bacteroidetes;c__Flavobacteriia", "k__Bacteria;p__Bacteroidetes;c__Sphingobacteriia", "k__Bacteria;p__Bacteroidetes;c__[Saprospirae]", "k__Bacteria;p__Caldiserica;c__OP5", "k__Bacteria;p__Caldiserica;c__TTA-B1", "k__Bacteria;p__Chlorobi;c__SJA-28", "k__Bacteria;p__Chloroflexi;c__", "k__Bacteria;p__Chloroflexi;c__Anaerolineae", "k__Bacteria;p__Chloroflexi;c__Ellin6529", "k__Bacteria;p__Chloroflexi;c__SHA-26", "k__Bacteria;p__Cyanobacteria;c__4C0d-2", "k__Bacteria;p__Cyanobacteria;c__Chloroplast", "k__Bacteria;p__EM3;c__", "k__Bacteria;p__Fibrobacteres;c__TG3", "k__Bacteria;p__Firmicutes;c__Bacilli", "k__Bacteria;p__Firmicutes;c__Clostridia", "k__Bacteria;p__Firmicutes;c__Erysipelotrichi", "k__Bacteria;p__Firmicutes;c__OPB54", "k__Bacteria;p__NKB19;__", "k__Bacteria;p__NKB19;c__TSBW08", "k__Bacteria;p__OD1;c__", "k__Bacteria;p__OD1;c__ABY1", "k__Bacteria;p__OP1;c__OPB14", "k__Bacteria;p__OP8;c__OP8_1", "k__Bacteria;p__OP9;c__JS1", "k__Bacteria;p__OP9;c__OPB46", "k__Bacteria;p__Proteobacteria;__", "k__Bacteria;p__Proteobacteria;c__Alphaproteobacteria", "k__Bacteria;p__Proteobacteria;c__Betaproteobacteria", "k__Bacteria;p__Proteobacteria;c__Deltaproteobacteria", "k__Bacteria;p__Proteobacteria;c__Epsilonproteobacteria", "k__Bacteria;p__Proteobacteria;c__Gammaproteobacteria", "k__Bacteria;p__SAR406;c__AB16", "k__Bacteria;p__SR1;c__", "k__Bacteria;p__Spirochaetes;c__Spirochaetes", "k__Bacteria;p__Spirochaetes;c__[Brachyspirae]", "k__Bacteria;p__Spirochaetes;c__[Leptospirae]", "k__Bacteria;p__Synergistetes;c__Synergistia", "k__Bacteria;p__TA06;c__", "k__Bacteria;p__TM6;c__SJA-4", "k__Bacteria;p__TM7;c__TM7-1", "k__Bacteria;p__TM7;c__TM7-3", "k__Bacteria;p__Tenericutes;c__Mollicutes", "k__Bacteria;p__Tenericutes;c__RF3", "k__Bacteria;p__Thermotogae;c__Thermotogae", "k__Bacteria;p__Verrucomicrobia;c__Verruco-5", "k__Bacteria;p__Verrucomicrobia;c__[Pedosphaerae]", "k__Bacteria;p__WS6;c__SC72", "k__Bacteria;p__WWE1;c__[Cloacamonae]", "k__Bacteria;p__[Thermi];c__Deinococci", "Process Day", "arsenite add.", "plant no.", "plant type"],[{"index":"U341F-U806R-P1-NW4-1-14-40","k__Archaea;p__Euryarchaeota;c__Methanobacteria":25.0,"k__Archaea;p__Euryarchaeota;c__Methanomicrobia":537.0,"k__Archaea;p__Euryarchaeota;c__Thermoplasmata":0.0,"k__Bacteria;__;__":23.0,"k__Bacteria;p__;c__":5.0,"k__Bacteria;p__Acidobacteria;c__BPC102":0.0,"k__Bacteria;p__Acidobacteria;c__Sva0725":26.0,"k__Bacteria;p__Acidobacteria;c__[Chloracidobacteria]":0.0,"k__Bacteria;p__Actinobacteria;c__":13.0,"k__Bacteria;p__Actinobacteria;c__Acidimicrobiia":63.0,"k__Bacteria;p__Actinobacteria;c__Actinobacteria":218.0,"k__Bacteria;p__Actinobacteria;c__Thermoleophilia":0.0,"k__Bacteria;p__Bacteroidetes;__":85.0,"k__Bacteria;p__Bacteroidetes;c__Bacteroidia":1671.0,"k__Bacteria;p__Bacteroidetes;c__Cytophagia":0.0,"k__Bacteria;p__Bacteroidetes;c__Flavobacteriia":0.0,"k__Bacteria;p__Bacteroidetes;c__Sphingobacteriia":10.0,"k__Bacteria;p__Bacteroidetes;c__[Saprospirae]":58.0,"k__Bacteria;p__Caldiserica;c__OP5":14.0,"k__Bacteria;p__Caldiserica;c__TTA-B1":23.0,"k__Bacteria;p__Chlorobi;c__SJA-28":0.0,"k__Bacteria;p__Chloroflexi;c__":15.0,"k__Bacteria;p__Chloroflexi;c__Anaerolineae":240.0,"k__Bacteria;p__Chloroflexi;c__Ellin6529":0.0,"k__Bacteria;p__Chloroflexi;c__SHA-26":0.0,"k__Bacteria;p__Cyanobacteria;c__4C0d-2":0.0,"k__Bacteria;p__Cyanobacteria;c__Chloroplast":0.0,"k__Bacteria;p__EM3;c__":117.0,"k__Bacteria;p__Fibrobacteres;c__TG3":0.0,"k__Bacteria;p__Firmicutes;c__Bacilli":40.0,"k__Bacteria;p__Firmicutes;c__Clostridia":813.0,"k__Bacteria;p__Firmicutes;c__Erysipelotrichi":0.0,"k__Bacteria;p__Firmicutes;c__OPB54":0.0,"k__Bacteria;p__NKB19;__":0.0,"k__Bacteria;p__NKB19;c__TSBW08":2.0,"k__Bacteria;p__OD1;c__":35.0,"k__Bacteria;p__OD1;c__ABY1":16.0,"k__Bacteria;p__OP1;c__OPB14":0.0,"k__Bacteria;p__OP8;c__OP8_1":49.0,"k__Bacteria;p__OP9;c__JS1":0.0,"k__Bacteria;p__OP9;c__OPB46":31.0,"k__Bacteria;p__Proteobacteria;__":0.0,"k__Bacteria;p__Proteobacteria;c__Alphaproteobacteria":15.0,"k__Bacteria;p__Proteobacteria;c__Betaproteobacteria":92.0,"k__Bacteria;p__Proteobacteria;c__Deltaproteobacteria":74.0,"k__Bacteria;p__Proteobacteria;c__Epsilonproteobacteria":11.0,"k__Bacteria;p__Proteobacteria;c__Gammaproteobacteria":0.0,"k__Bacteria;p__SAR406;c__AB16":9.0,"k__Bacteria;p__SR1;c__":0.0,"k__Bacteria;p__Spirochaetes;c__Spirochaetes":476.0,"k__Bacteria;p__Spirochaetes;c__[Brachyspirae]":0.0,"k__Bacteria;p__Spirochaetes;c__[Leptospirae]":19.0,"k__Bacteria;p__Synergistetes;c__Synergistia":32.0,"k__Bacteria;p__TA06;c__":5.0,"k__Bacteria;p__TM6;c__SJA-4":0.0,"k__Bacteria;p__TM7;c__TM7-1":22.0,"k__Bacteria;p__TM7;c__TM7-3":53.0,"k__Bacteria;p__Tenericutes;c__Mollicutes":0.0,"k__Bacteria;p__Tenericutes;c__RF3":0.0,"k__Bacteria;p__Thermotogae;c__Thermotogae":29.0,"k__Bacteria;p__Verrucomicrobia;c__Verruco-5":32.0,"k__Bacteria;p__Verrucomicrobia;c__[Pedosphaerae]":0.0,"k__Bacteria;p__WS6;c__SC72":0.0,"k__Bacteria;p__WWE1;c__[Cloacamonae]":753.0,"k__Bacteria;p__[Thermi];c__Deinococci":0.0,"Process Day":"01","arsenite add.":"As0","plant no.":"#14","plant type":"SSD"},{"index":"U341F-U806R-P1-NW4-1-14-41","k__Archaea;p__Euryarchaeota;c__Methanobacteria":51.0,"k__Archaea;p__Euryarchaeota;c__Methanomicrobia":1497.0,"k__Archaea;p__Euryarchaeota;c__Thermoplasmata":0.0,"k__Bacteria;__;__":40.0,"k__Bacteria;p__;c__":10.0,"k__Bacteria;p__Acidobacteria;c__BPC102":13.0,"k__Bacteria;p__Acidobacteria;c__Sva0725":54.0,"k__Bacteria;p__Acidobacteria;c__[Chloracidobacteria]":6.0,"k__Bacteria;p__Actinobacteria;c__":14.0,"k__Bacteria;p__Actinobacteria;c__Acidimicrobiia":170.0,"k__Bacteria;p__Actinobacteria;c__Actinobacteria":614.0,"k__Bacteria;p__Actinobacteria;c__Thermoleophilia":20.0,"k__Bacteria;p__Bacteroidetes;__":133.0,"k__Bacteria;p__Bacteroidetes;c__Bacteroidia":3457.0,"k__Bacteria;p__Bacteroidetes;c__Cytophagia":0.0,"k__Bacteria;p__Bacteroidetes;c__Flavobacteriia":30.0,"k__Bacteria;p__Bacteroidetes;c__Sphingobacteriia":0.0,"k__Bacteria;p__Bacteroidetes;c__[Saprospirae]":113.0,"k__Bacteria;p__Caldiserica;c__OP5":66.0,"k__Bacteria;p__Caldiserica;c__TTA-B1":71.0,"k__Bacteria;p__Chlorobi;c__SJA-28":33.0,"k__Bacteria;p__Chloroflexi;c__":0.0,"k__Bacteria;p__Chloroflexi;c__Anaerolineae":644.0,"k__Bacteria;p__Chloroflexi;c__Ellin6529":7.0,"k__Bacteria;p__Chloroflexi;c__SHA-26":0.0,"k__Bacteria;p__Cyanobacteria;c__4C0d-2":8.0,"k__Bacteria;p__Cyanobacteria;c__Chloroplast":0.0,"k__Bacteria;p__EM3;c__":332.0,"k__Bacteria;p__Fibrobacteres;c__TG3":0.0,"k__Bacteria;p__Firmicutes;c__Bacilli":76.0,"k__Bacteria;p__Firmicutes;c__Clostridia":2226.0,"k__Bacteria;p__Firmicutes;c__Erysipelotrichi":0.0,"k__Bacteria;p__Firmicutes;c__OPB54":0.0,"k__Bacteria;p__NKB19;__":0.0,"k__Bacteria;p__NKB19;c__TSBW08":0.0,"k__Bacteria;p__OD1;c__":105.0,"k__Bacteria;p__OD1;c__ABY1":12.0,"k__Bacteria;p__OP1;c__OPB14":5.0,"k__Bacteria;p__OP8;c__OP8_1":107.0,"k__Bacteria;p__OP9;c__JS1":9.0,"k__Bacteria;p__OP9;c__OPB46":70.0,"k__Bacteria;p__Proteobacteria;__":0.0,"k__Bacteria;p__Proteobacteria;c__Alphaproteobacteria":139.0,"k__Bacteria;p__Proteobacteria;c__Betaproteobacteria":156.0,"k__Bacteria;p__Proteobacteria;c__Deltaproteobacteria":112.0,"k__Bacteria;p__Proteobacteria;c__Epsilonproteobacteria":18.0,"k__Bacteria;p__Proteobacteria;c__Gammaproteobacteria":60.0,"k__Bacteria;p__SAR406;c__AB16":22.0,"k__Bacteria;p__SR1;c__":11.0,"k__Bacteria;p__Spirochaetes;c__Spirochaetes":822.0,"k__Bacteria;p__Spirochaetes;c__[Brachyspirae]":5.0,"k__Bacteria;p__Spirochaetes;c__[Leptospirae]":28.0,"k__Bacteria;p__Synergistetes;c__Synergistia":71.0,"k__Bacteria;p__TA06;c__":0.0,"k__Bacteria;p__TM6;c__SJA-4":0.0,"k__Bacteria;p__TM7;c__TM7-1":78.0,"k__Bacteria;p__TM7;c__TM7-3":133.0,"k__Bacteria;p__Tenericutes;c__Mollicutes":0.0,"k__Bacteria;p__Tenericutes;c__RF3":0.0,"k__Bacteria;p__Thermotogae;c__Thermotogae":35.0,"k__Bacteria;p__Verrucomicrobia;c__Verruco-5":31.0,"k__Bacteria;p__Verrucomicrobia;c__[Pedosphaerae]":13.0,"k__Bacteria;p__WS6;c__SC72":3.0,"k__Bacteria;p__WWE1;c__[Cloacamonae]":1396.0,"k__Bacteria;p__[Thermi];c__Deinococci":0.0,"Process Day":"01","arsenite add.":"As0","plant no.":"#14","plant type":"SSD"},{"index":"U341F-U806R-P1-NW4-1-27-100","k__Archaea;p__Euryarchaeota;c__Methanobacteria":17.0,"k__Archaea;p__Euryarchaeota;c__Methanomicrobia":910.0,"k__Archaea;p__Euryarchaeota;c__Thermoplasmata":15.0,"k__Bacteria;__;__":58.0,"k__Bacteria;p__;c__":19.0,"k__Bacteria;p__Acidobacteria;c__BPC102":13.0,"k__Bacteria;p__Acidobacteria;c__Sva0725":35.0,"k__Bacteria;p__Acidobacteria;c__[Chloracidobacteria]":0.0,"k__Bacteria;p__Actinobacteria;c__":54.0,"k__Bacteria;p__Actinobacteria;c__Acidimicrobiia":47.0,"k__Bacteria;p__Actinobacteria;c__Actinobacteria":370.0,"k__Bacteria;p__Actinobacteria;c__Thermoleophilia":23.0,"k__Bacteria;p__Bacteroidetes;__":115.0,"k__Bacteria;p__Bacteroidetes;c__Bacteroidia":5956.0,"k__Bacteria;p__Bacteroidetes;c__Cytophagia":0.0,"k__Bacteria;p__Bacteroidetes;c__Flavobacteriia":6.0,"k__Bacteria;p__Bacteroidetes;c__Sphingobacteriia":0.0,"k__Bacteria;p__Bacteroidetes;c__[Saprospirae]":0.0,"k__Bacteria;p__Caldiserica;c__OP5":136.0,"k__Bacteria;p__Caldiserica;c__TTA-B1":187.0,"k__Bacteria;p__Chlorobi;c__SJA-28":0.0,"k__Bacteria;p__Chloroflexi;c__":0.0,"k__Bacteria;p__Chloroflexi;c__Anaerolineae":1231.0,"k__Bacteria;p__Chloroflexi;c__Ellin6529":0.0,"k__Bacteria;p__Chloroflexi;c__SHA-26":0.0,"k__Bacteria;p__Cyanobacteria;c__4C0d-2":0.0,"k__Bacteria;p__Cyanobacteria;c__Chloroplast":0.0,"k__Bacteria;p__EM3;c__":754.0,"k__Bacteria;p__Fibrobacteres;c__TG3":0.0,"k__Bacteria;p__Firmicutes;c__Bacilli":13.0,"k__Bacteria;p__Firmicutes;c__Clostridia":1287.0,"k__Bacteria;p__Firmicutes;c__Erysipelotrichi":0.0,"k__Bacteria;p__Firmicutes;c__OPB54":0.0,"k__Bacteria;p__NKB19;__":0.0,"k__Bacteria;p__NKB19;c__TSBW08":0.0,"k__Bacteria;p__OD1;c__":324.0,"k__Bacteria;p__OD1;c__ABY1":0.0,"k__Bacteria;p__OP1;c__OPB14":13.0,"k__Bacteria;p__OP8;c__OP8_1":163.0,"k__Bacteria;p__OP9;c__JS1":26.0,"k__Bacteria;p__OP9;c__OPB46":76.0,"k__Bacteria;p__Proteobacteria;__":0.0,"k__Bacteria;p__Proteobacteria;c__Alphaproteobacteria":37.0,"k__Bacteria;p__Proteobacteria;c__Betaproteobacteria":61.0,"k__Bacteria;p__Proteobacteria;c__Deltaproteobacteria":49.0,"k__Bacteria;p__Proteobacteria;c__Epsilonproteobacteria":0.0,"k__Bacteria;p__Proteobacteria;c__Gammaproteobacteria":0.0,"k__Bacteria;p__SAR406;c__AB16":37.0,"k__Bacteria;p__SR1;c__":0.0,"k__Bacteria;p__Spirochaetes;c__Spirochaetes":1970.0,"k__Bacteria;p__Spirochaetes;c__[Brachyspirae]":0.0,"k__Bacteria;p__Spirochaetes;c__[Leptospirae]":0.0,"k__Bacteria;p__Synergistetes;c__Synergistia":93.0,"k__Bacteria;p__TA06;c__":39.0,"k__Bacteria;p__TM6;c__SJA-4":0.0,"k__Bacteria;p__TM7;c__TM7-1":28.0,"k__Bacteria;p__TM7;c__TM7-3":24.0,"k__Bacteria;p__Tenericutes;c__Mollicutes":0.0,"k__Bacteria;p__Tenericutes;c__RF3":0.0,"k__Bacteria;p__Thermotogae;c__Thermotogae":86.0,"k__Bacteria;p__Verrucomicrobia;c__Verruco-5":0.0,"k__Bacteria;p__Verrucomicrobia;c__[Pedosphaerae]":0.0,"k__Bacteria;p__WS6;c__SC72":0.0,"k__Bacteria;p__WWE1;c__[Cloacamonae]":3363.0,"k__Bacteria;p__[Thermi];c__Deinococci":0.0,"Process Day":"15","arsenite add.":"As0","plant no.":"#14","plant type":"SSD"},{"index":"U341F-U806R-P1-NW4-1-29-104","k__Archaea;p__Euryarchaeota;c__Methanobacteria":0.0,"k__Archaea;p__Euryarchaeota;c__Methanomicrobia":280.0,"k__Archaea;p__Euryarchaeota;c__Thermoplasmata":10.0,"k__Bacteria;__;__":171.0,"k__Bacteria;p__;c__":51.0,"k__Bacteria;p__Acidobacteria;c__BPC102":6.0,"k__Bacteria;p__Acidobacteria;c__Sva0725":134.0,"k__Bacteria;p__Acidobacteria;c__[Chloracidobacteria]":0.0,"k__Bacteria;p__Actinobacteria;c__":93.0,"k__Bacteria;p__Actinobacteria;c__Acidimicrobiia":72.0,"k__Bacteria;p__Actinobacteria;c__Actinobacteria":623.0,"k__Bacteria;p__Actinobacteria;c__Thermoleophilia":63.0,"k__Bacteria;p__Bacteroidetes;__":321.0,"k__Bacteria;p__Bacteroidetes;c__Bacteroidia":5467.0,"k__Bacteria;p__Bacteroidetes;c__Cytophagia":0.0,"k__Bacteria;p__Bacteroidetes;c__Flavobacteriia":15.0,"k__Bacteria;p__Bacteroidetes;c__Sphingobacteriia":0.0,"k__Bacteria;p__Bacteroidetes;c__[Saprospirae]":3.0,"k__Bacteria;p__Caldiserica;c__OP5":134.0,"k__Bacteria;p__Caldiserica;c__TTA-B1":320.0,"k__Bacteria;p__Chlorobi;c__SJA-28":0.0,"k__Bacteria;p__Chloroflexi;c__":0.0,"k__Bacteria;p__Chloroflexi;c__Anaerolineae":783.0,"k__Bacteria;p__Chloroflexi;c__Ellin6529":0.0,"k__Bacteria;p__Chloroflexi;c__SHA-26":5.0,"k__Bacteria;p__Cyanobacteria;c__4C0d-2":0.0,"k__Bacteria;p__Cyanobacteria;c__Chloroplast":4.0,"k__Bacteria;p__EM3;c__":343.0,"k__Bacteria;p__Fibrobacteres;c__TG3":0.0,"k__Bacteria;p__Firmicutes;c__Bacilli":44.0,"k__Bacteria;p__Firmicutes;c__Clostridia":3833.0,"k__Bacteria;p__Firmicutes;c__Erysipelotrichi":0.0,"k__Bacteria;p__Firmicutes;c__OPB54":0.0,"k__Bacteria;p__NKB19;__":8.0,"k__Bacteria;p__NKB19;c__TSBW08":14.0,"k__Bacteria;p__OD1;c__":624.0,"k__Bacteria;p__OD1;c__ABY1":20.0,"k__Bacteria;p__OP1;c__OPB14":48.0,"k__Bacteria;p__OP8;c__OP8_1":205.0,"k__Bacteria;p__OP9;c__JS1":43.0,"k__Bacteria;p__OP9;c__OPB46":129.0,"k__Bacteria;p__Proteobacteria;__":4.0,"k__Bacteria;p__Proteobacteria;c__Alphaproteobacteria":45.0,"k__Bacteria;p__Proteobacteria;c__Betaproteobacteria":228.0,"k__Bacteria;p__Proteobacteria;c__Deltaproteobacteria":114.0,"k__Bacteria;p__Proteobacteria;c__Epsilonproteobacteria":0.0,"k__Bacteria;p__Proteobacteria;c__Gammaproteobacteria":40.0,"k__Bacteria;p__SAR406;c__AB16":138.0,"k__Bacteria;p__SR1;c__":0.0,"k__Bacteria;p__Spirochaetes;c__Spirochaetes":1736.0,"k__Bacteria;p__Spirochaetes;c__[Brachyspirae]":7.0,"k__Bacteria;p__Spirochaetes;c__[Leptospirae]":6.0,"k__Bacteria;p__Synergistetes;c__Synergistia":175.0,"k__Bacteria;p__TA06;c__":58.0,"k__Bacteria;p__TM6;c__SJA-4":3.0,"k__Bacteria;p__TM7;c__TM7-1":47.0,"k__Bacteria;p__TM7;c__TM7-3":36.0,"k__Bacteria;p__Tenericutes;c__Mollicutes":0.0,"k__Bacteria;p__Tenericutes;c__RF3":0.0,"k__Bacteria;p__Thermotogae;c__Thermotogae":172.0,"k__Bacteria;p__Verrucomicrobia;c__Verruco-5":0.0,"k__Bacteria;p__Verrucomicrobia;c__[Pedosphaerae]":0.0,"k__Bacteria;p__WS6;c__SC72":0.0,"k__Bacteria;p__WWE1;c__[Cloacamonae]":3528.0,"k__Bacteria;p__[Thermi];c__Deinococci":0.0,"Process Day":"15","arsenite add.":"As30","plant no.":"#14","plant type":"SSD"},{"index":"U341F-U806R-P1-NW4-1-31-108","k__Archaea;p__Euryarchaeota;c__Methanobacteria":0.0,"k__Archaea;p__Euryarchaeota;c__Methanomicrobia":257.0,"k__Archaea;p__Euryarchaeota;c__Thermoplasmata":0.0,"k__Bacteria;__;__":22.0,"k__Bacteria;p__;c__":0.0,"k__Bacteria;p__Acidobacteria;c__BPC102":0.0,"k__Bacteria;p__Acidobacteria;c__Sva0725":16.0,"k__Bacteria;p__Acidobacteria;c__[Chloracidobacteria]":0.0,"k__Bacteria;p__Actinobacteria;c__":15.0,"k__Bacteria;p__Actinobacteria;c__Acidimicrobiia":38.0,"k__Bacteria;p__Actinobacteria;c__Actinobacteria":254.0,"k__Bacteria;p__Actinobacteria;c__Thermoleophilia":27.0,"k__Bacteria;p__Bacteroidetes;__":80.0,"k__Bacteria;p__Bacteroidetes;c__Bacteroidia":3601.0,"k__Bacteria;p__Bacteroidetes;c__Cytophagia":0.0,"k__Bacteria;p__Bacteroidetes;c__Flavobacteriia":6.0,"k__Bacteria;p__Bacteroidetes;c__Sphingobacteriia":0.0,"k__Bacteria;p__Bacteroidetes;c__[Saprospirae]":0.0,"k__Bacteria;p__Caldiserica;c__OP5":56.0,"k__Bacteria;p__Caldiserica;c__TTA-B1":63.0,"k__Bacteria;p__Chlorobi;c__SJA-28":0.0,"k__Bacteria;p__Chloroflexi;c__":0.0,"k__Bacteria;p__Chloroflexi;c__Anaerolineae":717.0,"k__Bacteria;p__Chloroflexi;c__Ellin6529":0.0,"k__Bacteria;p__Chloroflexi;c__SHA-26":0.0,"k__Bacteria;p__Cyanobacteria;c__4C0d-2":0.0,"k__Bacteria;p__Cyanobacteria;c__Chloroplast":0.0,"k__Bacteria;p__EM3;c__":588.0,"k__Bacteria;p__Fibrobacteres;c__TG3":0.0,"k__Bacteria;p__Firmicutes;c__Bacilli":0.0,"k__Bacteria;p__Firmicutes;c__Clostridia":956.0,"k__Bacteria;p__Firmicutes;c__Erysipelotrichi":0.0,"k__Bacteria;p__Firmicutes;c__OPB54":0.0,"k__Bacteria;p__NKB19;__":0.0,"k__Bacteria;p__NKB19;c__TSBW08":0.0,"k__Bacteria;p__OD1;c__":93.0,"k__Bacteria;p__OD1;c__ABY1":0.0,"k__Bacteria;p__OP1;c__OPB14":6.0,"k__Bacteria;p__OP8;c__OP8_1":96.0,"k__Bacteria;p__OP9;c__JS1":8.0,"k__Bacteria;p__OP9;c__OPB46":44.0,"k__Bacteria;p__Proteobacteria;__":0.0,"k__Bacteria;p__Proteobacteria;c__Alphaproteobacteria":10.0,"k__Bacteria;p__Proteobacteria;c__Betaproteobacteria":43.0,"k__Bacteria;p__Proteobacteria;c__Deltaproteobacteria":36.0,"k__Bacteria;p__Proteobacteria;c__Epsilonproteobacteria":0.0,"k__Bacteria;p__Proteobacteria;c__Gammaproteobacteria":29.0,"k__Bacteria;p__SAR406;c__AB16":13.0,"k__Bacteria;p__SR1;c__":0.0,"k__Bacteria;p__Spirochaetes;c__Spirochaetes":982.0,"k__Bacteria;p__Spirochaetes;c__[Brachyspirae]":0.0,"k__Bacteria;p__Spirochaetes;c__[Leptospirae]":0.0,"k__Bacteria;p__Synergistetes;c__Synergistia":29.0,"k__Bacteria;p__TA06;c__":5.0,"k__Bacteria;p__TM6;c__SJA-4":0.0,"k__Bacteria;p__TM7;c__TM7-1":40.0,"k__Bacteria;p__TM7;c__TM7-3":18.0,"k__Bacteria;p__Tenericutes;c__Mollicutes":0.0,"k__Bacteria;p__Tenericutes;c__RF3":0.0,"k__Bacteria;p__Thermotogae;c__Thermotogae":41.0,"k__Bacteria;p__Verrucomicrobia;c__Verruco-5":0.0,"k__Bacteria;p__Verrucomicrobia;c__[Pedosphaerae]":0.0,"k__Bacteria;p__WS6;c__SC72":0.0,"k__Bacteria;p__WWE1;c__[Cloacamonae]":1544.0,"k__Bacteria;p__[Thermi];c__Deinococci":0.0,"Process Day":"15","arsenite add.":"As60","plant no.":"#14","plant type":"SSD"},{"index":"U341F-U806R-P1-NW4-1-31-109","k__Archaea;p__Euryarchaeota;c__Methanobacteria":0.0,"k__Archaea;p__Euryarchaeota;c__Methanomicrobia":226.0,"k__Archaea;p__Euryarchaeota;c__Thermoplasmata":0.0,"k__Bacteria;__;__":18.0,"k__Bacteria;p__;c__":13.0,"k__Bacteria;p__Acidobacteria;c__BPC102":0.0,"k__Bacteria;p__Acidobacteria;c__Sva0725":18.0,"k__Bacteria;p__Acidobacteria;c__[Chloracidobacteria]":0.0,"k__Bacteria;p__Actinobacteria;c__":14.0,"k__Bacteria;p__Actinobacteria;c__Acidimicrobiia":37.0,"k__Bacteria;p__Actinobacteria;c__Actinobacteria":213.0,"k__Bacteria;p__Actinobacteria;c__Thermoleophilia":26.0,"k__Bacteria;p__Bacteroidetes;__":58.0,"k__Bacteria;p__Bacteroidetes;c__Bacteroidia":3316.0,"k__Bacteria;p__Bacteroidetes;c__Cytophagia":0.0,"k__Bacteria;p__Bacteroidetes;c__Flavobacteriia":0.0,"k__Bacteria;p__Bacteroidetes;c__Sphingobacteriia":0.0,"k__Bacteria;p__Bacteroidetes;c__[Saprospirae]":0.0,"k__Bacteria;p__Caldiserica;c__OP5":66.0,"k__Bacteria;p__Caldiserica;c__TTA-B1":147.0,"k__Bacteria;p__Chlorobi;c__SJA-28":0.0,"k__Bacteria;p__Chloroflexi;c__":0.0,"k__Bacteria;p__Chloroflexi;c__Anaerolineae":1080.0,"k__Bacteria;p__Chloroflexi;c__Ellin6529":0.0,"k__Bacteria;p__Chloroflexi;c__SHA-26":0.0,"k__Bacteria;p__Cyanobacteria;c__4C0d-2":0.0,"k__Bacteria;p__Cyanobacteria;c__Chloroplast":0.0,"k__Bacteria;p__EM3;c__":698.0,"k__Bacteria;p__Fibrobacteres;c__TG3":0.0,"k__Bacteria;p__Firmicutes;c__Bacilli":0.0,"k__Bacteria;p__Firmicutes;c__Clostridia":1123.0,"k__Bacteria;p__Firmicutes;c__Erysipelotrichi":0.0,"k__Bacteria;p__Firmicutes;c__OPB54":0.0,"k__Bacteria;p__NKB19;__":0.0,"k__Bacteria;p__NKB19;c__TSBW08":0.0,"k__Bacteria;p__OD1;c__":114.0,"k__Bacteria;p__OD1;c__ABY1":5.0,"k__Bacteria;p__OP1;c__OPB14":0.0,"k__Bacteria;p__OP8;c__OP8_1":152.0,"k__Bacteria;p__OP9;c__JS1":17.0,"k__Bacteria;p__OP9;c__OPB46":82.0,"k__Bacteria;p__Proteobacteria;__":0.0,"k__Bacteria;p__Proteobacteria;c__Alphaproteobacteria":25.0,"k__Bacteria;p__Proteobacteria;c__Betaproteobacteria":53.0,"k__Bacteria;p__Proteobacteria;c__Deltaproteobacteria":22.0,"k__Bacteria;p__Proteobacteria;c__Epsilonproteobacteria":0.0,"k__Bacteria;p__Proteobacteria;c__Gammaproteobacteria":0.0,"k__Bacteria;p__SAR406;c__AB16":11.0,"k__Bacteria;p__SR1;c__":0.0,"k__Bacteria;p__Spirochaetes;c__Spirochaetes":762.0,"k__Bacteria;p__Spirochaetes;c__[Brachyspirae]":0.0,"k__Bacteria;p__Spirochaetes;c__[Leptospirae]":0.0,"k__Bacteria;p__Synergistetes;c__Synergistia":22.0,"k__Bacteria;p__TA06;c__":15.0,"k__Bacteria;p__TM6;c__SJA-4":0.0,"k__Bacteria;p__TM7;c__TM7-1":44.0,"k__Bacteria;p__TM7;c__TM7-3":21.0,"k__Bacteria;p__Tenericutes;c__Mollicutes":0.0,"k__Bacteria;p__Tenericutes;c__RF3":0.0,"k__Bacteria;p__Thermotogae;c__Thermotogae":45.0,"k__Bacteria;p__Verrucomicrobia;c__Verruco-5":0.0,"k__Bacteria;p__Verrucomicrobia;c__[Pedosphaerae]":0.0,"k__Bacteria;p__WS6;c__SC72":4.0,"k__Bacteria;p__WWE1;c__[Cloacamonae]":1492.0,"k__Bacteria;p__[Thermi];c__Deinococci":0.0,"Process Day":"15","arsenite add.":"As60","plant no.":"#14","plant type":"SSD"},{"index":"U341F-U806R-P1-NW4-1-33-79","k__Archaea;p__Euryarchaeota;c__Methanobacteria":87.0,"k__Archaea;p__Euryarchaeota;c__Methanomicrobia":250.0,"k__Archaea;p__Euryarchaeota;c__Thermoplasmata":9.0,"k__Bacteria;__;__":30.0,"k__Bacteria;p__;c__":0.0,"k__Bacteria;p__Acidobacteria;c__BPC102":0.0,"k__Bacteria;p__Acidobacteria;c__Sva0725":0.0,"k__Bacteria;p__Acidobacteria;c__[Chloracidobacteria]":0.0,"k__Bacteria;p__Actinobacteria;c__":0.0,"k__Bacteria;p__Actinobacteria;c__Acidimicrobiia":0.0,"k__Bacteria;p__Actinobacteria;c__Actinobacteria":22.0,"k__Bacteria;p__Actinobacteria;c__Thermoleophilia":0.0,"k__Bacteria;p__Bacteroidetes;__":1934.0,"k__Bacteria;p__Bacteroidetes;c__Bacteroidia":1147.0,"k__Bacteria;p__Bacteroidetes;c__Cytophagia":258.0,"k__Bacteria;p__Bacteroidetes;c__Flavobacteriia":0.0,"k__Bacteria;p__Bacteroidetes;c__Sphingobacteriia":0.0,"k__Bacteria;p__Bacteroidetes;c__[Saprospirae]":0.0,"k__Bacteria;p__Caldiserica;c__OP5":0.0,"k__Bacteria;p__Caldiserica;c__TTA-B1":0.0,"k__Bacteria;p__Chlorobi;c__SJA-28":0.0,"k__Bacteria;p__Chloroflexi;c__":0.0,"k__Bacteria;p__Chloroflexi;c__Anaerolineae":0.0,"k__Bacteria;p__Chloroflexi;c__Ellin6529":0.0,"k__Bacteria;p__Chloroflexi;c__SHA-26":0.0,"k__Bacteria;p__Cyanobacteria;c__4C0d-2":0.0,"k__Bacteria;p__Cyanobacteria;c__Chloroplast":0.0,"k__Bacteria;p__EM3;c__":0.0,"k__Bacteria;p__Fibrobacteres;c__TG3":0.0,"k__Bacteria;p__Firmicutes;c__Bacilli":82.0,"k__Bacteria;p__Firmicutes;c__Clostridia":11829.0,"k__Bacteria;p__Firmicutes;c__Erysipelotrichi":0.0,"k__Bacteria;p__Firmicutes;c__OPB54":79.0,"k__Bacteria;p__NKB19;__":0.0,"k__Bacteria;p__NKB19;c__TSBW08":0.0,"k__Bacteria;p__OD1;c__":0.0,"k__Bacteria;p__OD1;c__ABY1":0.0,"k__Bacteria;p__OP1;c__OPB14":0.0,"k__Bacteria;p__OP8;c__OP8_1":0.0,"k__Bacteria;p__OP9;c__JS1":0.0,"k__Bacteria;p__OP9;c__OPB46":50.0,"k__Bacteria;p__Proteobacteria;__":0.0,"k__Bacteria;p__Proteobacteria;c__Alphaproteobacteria":37.0,"k__Bacteria;p__Proteobacteria;c__Betaproteobacteria":0.0,"k__Bacteria;p__Proteobacteria;c__Deltaproteobacteria":0.0,"k__Bacteria;p__Proteobacteria;c__Epsilonproteobacteria":0.0,"k__Bacteria;p__Proteobacteria;c__Gammaproteobacteria":0.0,"k__Bacteria;p__SAR406;c__AB16":0.0,"k__Bacteria;p__SR1;c__":0.0,"k__Bacteria;p__Spirochaetes;c__Spirochaetes":11.0,"k__Bacteria;p__Spirochaetes;c__[Brachyspirae]":0.0,"k__Bacteria;p__Spirochaetes;c__[Leptospirae]":0.0,"k__Bacteria;p__Synergistetes;c__Synergistia":197.0,"k__Bacteria;p__TA06;c__":0.0,"k__Bacteria;p__TM6;c__SJA-4":0.0,"k__Bacteria;p__TM7;c__TM7-1":0.0,"k__Bacteria;p__TM7;c__TM7-3":0.0,"k__Bacteria;p__Tenericutes;c__Mollicutes":0.0,"k__Bacteria;p__Tenericutes;c__RF3":379.0,"k__Bacteria;p__Thermotogae;c__Thermotogae":844.0,"k__Bacteria;p__Verrucomicrobia;c__Verruco-5":0.0,"k__Bacteria;p__Verrucomicrobia;c__[Pedosphaerae]":0.0,"k__Bacteria;p__WS6;c__SC72":0.0,"k__Bacteria;p__WWE1;c__[Cloacamonae]":9.0,"k__Bacteria;p__[Thermi];c__Deinococci":0.0,"Process Day":"01","arsenite add.":"As0","plant no.":"#01","plant type":"Biogas"},{"index":"U341F-U806R-P1-NW4-1-33-80","k__Archaea;p__Euryarchaeota;c__Methanobacteria":52.0,"k__Archaea;p__Euryarchaeota;c__Methanomicrobia":125.0,"k__Archaea;p__Euryarchaeota;c__Thermoplasmata":0.0,"k__Bacteria;__;__":16.0,"k__Bacteria;p__;c__":0.0,"k__Bacteria;p__Acidobacteria;c__BPC102":0.0,"k__Bacteria;p__Acidobacteria;c__Sva0725":0.0,"k__Bacteria;p__Acidobacteria;c__[Chloracidobacteria]":0.0,"k__Bacteria;p__Actinobacteria;c__":0.0,"k__Bacteria;p__Actinobacteria;c__Acidimicrobiia":0.0,"k__Bacteria;p__Actinobacteria;c__Actinobacteria":14.0,"k__Bacteria;p__Actinobacteria;c__Thermoleophilia":0.0,"k__Bacteria;p__Bacteroidetes;__":1241.0,"k__Bacteria;p__Bacteroidetes;c__Bacteroidia":765.0,"k__Bacteria;p__Bacteroidetes;c__Cytophagia":153.0,"k__Bacteria;p__Bacteroidetes;c__Flavobacteriia":0.0,"k__Bacteria;p__Bacteroidetes;c__Sphingobacteriia":0.0,"k__Bacteria;p__Bacteroidetes;c__[Saprospirae]":0.0,"k__Bacteria;p__Caldiserica;c__OP5":0.0,"k__Bacteria;p__Caldiserica;c__TTA-B1":0.0,"k__Bacteria;p__Chlorobi;c__SJA-28":0.0,"k__Bacteria;p__Chloroflexi;c__":0.0,"k__Bacteria;p__Chloroflexi;c__Anaerolineae":0.0,"k__Bacteria;p__Chloroflexi;c__Ellin6529":0.0,"k__Bacteria;p__Chloroflexi;c__SHA-26":0.0,"k__Bacteria;p__Cyanobacteria;c__4C0d-2":0.0,"k__Bacteria;p__Cyanobacteria;c__Chloroplast":0.0,"k__Bacteria;p__EM3;c__":0.0,"k__Bacteria;p__Fibrobacteres;c__TG3":0.0,"k__Bacteria;p__Firmicutes;c__Bacilli":74.0,"k__Bacteria;p__Firmicutes;c__Clostridia":8178.0,"k__Bacteria;p__Firmicutes;c__Erysipelotrichi":6.0,"k__Bacteria;p__Firmicutes;c__OPB54":67.0,"k__Bacteria;p__NKB19;__":0.0,"k__Bacteria;p__NKB19;c__TSBW08":0.0,"k__Bacteria;p__OD1;c__":0.0,"k__Bacteria;p__OD1;c__ABY1":0.0,"k__Bacteria;p__OP1;c__OPB14":0.0,"k__Bacteria;p__OP8;c__OP8_1":0.0,"k__Bacteria;p__OP9;c__JS1":0.0,"k__Bacteria;p__OP9;c__OPB46":56.0,"k__Bacteria;p__Proteobacteria;__":0.0,"k__Bacteria;p__Proteobacteria;c__Alphaproteobacteria":0.0,"k__Bacteria;p__Proteobacteria;c__Betaproteobacteria":0.0,"k__Bacteria;p__Proteobacteria;c__Deltaproteobacteria":0.0,"k__Bacteria;p__Proteobacteria;c__Epsilonproteobacteria":0.0,"k__Bacteria;p__Proteobacteria;c__Gammaproteobacteria":0.0,"k__Bacteria;p__SAR406;c__AB16":0.0,"k__Bacteria;p__SR1;c__":0.0,"k__Bacteria;p__Spirochaetes;c__Spirochaetes":0.0,"k__Bacteria;p__Spirochaetes;c__[Brachyspirae]":0.0,"k__Bacteria;p__Spirochaetes;c__[Leptospirae]":0.0,"k__Bacteria;p__Synergistetes;c__Synergistia":167.0,"k__Bacteria;p__TA06;c__":0.0,"k__Bacteria;p__TM6;c__SJA-4":0.0,"k__Bacteria;p__TM7;c__TM7-1":0.0,"k__Bacteria;p__TM7;c__TM7-3":0.0,"k__Bacteria;p__Tenericutes;c__Mollicutes":0.0,"k__Bacteria;p__Tenericutes;c__RF3":188.0,"k__Bacteria;p__Thermotogae;c__Thermotogae":688.0,"k__Bacteria;p__Verrucomicrobia;c__Verruco-5":0.0,"k__Bacteria;p__Verrucomicrobia;c__[Pedosphaerae]":0.0,"k__Bacteria;p__WS6;c__SC72":0.0,"k__Bacteria;p__WWE1;c__[Cloacamonae]":0.0,"k__Bacteria;p__[Thermi];c__Deinococci":0.0,"Process Day":"01","arsenite add.":"As0","plant no.":"#01","plant type":"Biogas"},{"index":"U341F-U806R-P1-NW4-1-34-82","k__Archaea;p__Euryarchaeota;c__Methanobacteria":27.0,"k__Archaea;p__Euryarchaeota;c__Methanomicrobia":90.0,"k__Archaea;p__Euryarchaeota;c__Thermoplasmata":0.0,"k__Bacteria;__;__":28.0,"k__Bacteria;p__;c__":0.0,"k__Bacteria;p__Acidobacteria;c__BPC102":0.0,"k__Bacteria;p__Acidobacteria;c__Sva0725":0.0,"k__Bacteria;p__Acidobacteria;c__[Chloracidobacteria]":0.0,"k__Bacteria;p__Actinobacteria;c__":0.0,"k__Bacteria;p__Actinobacteria;c__Acidimicrobiia":0.0,"k__Bacteria;p__Actinobacteria;c__Actinobacteria":0.0,"k__Bacteria;p__Actinobacteria;c__Thermoleophilia":0.0,"k__Bacteria;p__Bacteroidetes;__":492.0,"k__Bacteria;p__Bacteroidetes;c__Bacteroidia":604.0,"k__Bacteria;p__Bacteroidetes;c__Cytophagia":0.0,"k__Bacteria;p__Bacteroidetes;c__Flavobacteriia":0.0,"k__Bacteria;p__Bacteroidetes;c__Sphingobacteriia":0.0,"k__Bacteria;p__Bacteroidetes;c__[Saprospirae]":0.0,"k__Bacteria;p__Caldiserica;c__OP5":0.0,"k__Bacteria;p__Caldiserica;c__TTA-B1":0.0,"k__Bacteria;p__Chlorobi;c__SJA-28":0.0,"k__Bacteria;p__Chloroflexi;c__":0.0,"k__Bacteria;p__Chloroflexi;c__Anaerolineae":0.0,"k__Bacteria;p__Chloroflexi;c__Ellin6529":0.0,"k__Bacteria;p__Chloroflexi;c__SHA-26":0.0,"k__Bacteria;p__Cyanobacteria;c__4C0d-2":0.0,"k__Bacteria;p__Cyanobacteria;c__Chloroplast":0.0,"k__Bacteria;p__EM3;c__":0.0,"k__Bacteria;p__Fibrobacteres;c__TG3":42.0,"k__Bacteria;p__Firmicutes;c__Bacilli":16.0,"k__Bacteria;p__Firmicutes;c__Clostridia":3068.0,"k__Bacteria;p__Firmicutes;c__Erysipelotrichi":0.0,"k__Bacteria;p__Firmicutes;c__OPB54":33.0,"k__Bacteria;p__NKB19;__":0.0,"k__Bacteria;p__NKB19;c__TSBW08":0.0,"k__Bacteria;p__OD1;c__":0.0,"k__Bacteria;p__OD1;c__ABY1":0.0,"k__Bacteria;p__OP1;c__OPB14":0.0,"k__Bacteria;p__OP8;c__OP8_1":0.0,"k__Bacteria;p__OP9;c__JS1":0.0,"k__Bacteria;p__OP9;c__OPB46":18.0,"k__Bacteria;p__Proteobacteria;__":0.0,"k__Bacteria;p__Proteobacteria;c__Alphaproteobacteria":0.0,"k__Bacteria;p__Proteobacteria;c__Betaproteobacteria":0.0,"k__Bacteria;p__Proteobacteria;c__Deltaproteobacteria":0.0,"k__Bacteria;p__Proteobacteria;c__Epsilonproteobacteria":0.0,"k__Bacteria;p__Proteobacteria;c__Gammaproteobacteria":0.0,"k__Bacteria;p__SAR406;c__AB16":0.0,"k__Bacteria;p__SR1;c__":8.0,"k__Bacteria;p__Spirochaetes;c__Spirochaetes":0.0,"k__Bacteria;p__Spirochaetes;c__[Brachyspirae]":0.0,"k__Bacteria;p__Spirochaetes;c__[Leptospirae]":0.0,"k__Bacteria;p__Synergistetes;c__Synergistia":55.0,"k__Bacteria;p__TA06;c__":0.0,"k__Bacteria;p__TM6;c__SJA-4":0.0,"k__Bacteria;p__TM7;c__TM7-1":0.0,"k__Bacteria;p__TM7;c__TM7-3":0.0,"k__Bacteria;p__Tenericutes;c__Mollicutes":0.0,"k__Bacteria;p__Tenericutes;c__RF3":130.0,"k__Bacteria;p__Thermotogae;c__Thermotogae":355.0,"k__Bacteria;p__Verrucomicrobia;c__Verruco-5":0.0,"k__Bacteria;p__Verrucomicrobia;c__[Pedosphaerae]":0.0,"k__Bacteria;p__WS6;c__SC72":0.0,"k__Bacteria;p__WWE1;c__[Cloacamonae]":0.0,"k__Bacteria;p__[Thermi];c__Deinococci":0.0,"Process Day":"15","arsenite add.":"As0","plant no.":"#01","plant type":"Biogas"},{"index":"U341F-U806R-P1-NW4-1-34-83","k__Archaea;p__Euryarchaeota;c__Methanobacteria":49.0,"k__Archaea;p__Euryarchaeota;c__Methanomicrobia":143.0,"k__Archaea;p__Euryarchaeota;c__Thermoplasmata":0.0,"k__Bacteria;__;__":55.0,"k__Bacteria;p__;c__":0.0,"k__Bacteria;p__Acidobacteria;c__BPC102":0.0,"k__Bacteria;p__Acidobacteria;c__Sva0725":0.0,"k__Bacteria;p__Acidobacteria;c__[Chloracidobacteria]":0.0,"k__Bacteria;p__Actinobacteria;c__":0.0,"k__Bacteria;p__Actinobacteria;c__Acidimicrobiia":0.0,"k__Bacteria;p__Actinobacteria;c__Actinobacteria":23.0,"k__Bacteria;p__Actinobacteria;c__Thermoleophilia":0.0,"k__Bacteria;p__Bacteroidetes;__":745.0,"k__Bacteria;p__Bacteroidetes;c__Bacteroidia":962.0,"k__Bacteria;p__Bacteroidetes;c__Cytophagia":107.0,"k__Bacteria;p__Bacteroidetes;c__Flavobacteriia":0.0,"k__Bacteria;p__Bacteroidetes;c__Sphingobacteriia":0.0,"k__Bacteria;p__Bacteroidetes;c__[Saprospirae]":0.0,"k__Bacteria;p__Caldiserica;c__OP5":0.0,"k__Bacteria;p__Caldiserica;c__TTA-B1":0.0,"k__Bacteria;p__Chlorobi;c__SJA-28":0.0,"k__Bacteria;p__Chloroflexi;c__":0.0,"k__Bacteria;p__Chloroflexi;c__Anaerolineae":0.0,"k__Bacteria;p__Chloroflexi;c__Ellin6529":0.0,"k__Bacteria;p__Chloroflexi;c__SHA-26":0.0,"k__Bacteria;p__Cyanobacteria;c__4C0d-2":0.0,"k__Bacteria;p__Cyanobacteria;c__Chloroplast":0.0,"k__Bacteria;p__EM3;c__":0.0,"k__Bacteria;p__Fibrobacteres;c__TG3":48.0,"k__Bacteria;p__Firmicutes;c__Bacilli":16.0,"k__Bacteria;p__Firmicutes;c__Clostridia":5627.0,"k__Bacteria;p__Firmicutes;c__Erysipelotrichi":0.0,"k__Bacteria;p__Firmicutes;c__OPB54":77.0,"k__Bacteria;p__NKB19;__":0.0,"k__Bacteria;p__NKB19;c__TSBW08":0.0,"k__Bacteria;p__OD1;c__":0.0,"k__Bacteria;p__OD1;c__ABY1":0.0,"k__Bacteria;p__OP1;c__OPB14":0.0,"k__Bacteria;p__OP8;c__OP8_1":0.0,"k__Bacteria;p__OP9;c__JS1":0.0,"k__Bacteria;p__OP9;c__OPB46":44.0,"k__Bacteria;p__Proteobacteria;__":0.0,"k__Bacteria;p__Proteobacteria;c__Alphaproteobacteria":0.0,"k__Bacteria;p__Proteobacteria;c__Betaproteobacteria":0.0,"k__Bacteria;p__Proteobacteria;c__Deltaproteobacteria":0.0,"k__Bacteria;p__Proteobacteria;c__Epsilonproteobacteria":0.0,"k__Bacteria;p__Proteobacteria;c__Gammaproteobacteria":0.0,"k__Bacteria;p__SAR406;c__AB16":0.0,"k__Bacteria;p__SR1;c__":11.0,"k__Bacteria;p__Spirochaetes;c__Spirochaetes":0.0,"k__Bacteria;p__Spirochaetes;c__[Brachyspirae]":0.0,"k__Bacteria;p__Spirochaetes;c__[Leptospirae]":0.0,"k__Bacteria;p__Synergistetes;c__Synergistia":119.0,"k__Bacteria;p__TA06;c__":0.0,"k__Bacteria;p__TM6;c__SJA-4":0.0,"k__Bacteria;p__TM7;c__TM7-1":0.0,"k__Bacteria;p__TM7;c__TM7-3":0.0,"k__Bacteria;p__Tenericutes;c__Mollicutes":6.0,"k__Bacteria;p__Tenericutes;c__RF3":263.0,"k__Bacteria;p__Thermotogae;c__Thermotogae":570.0,"k__Bacteria;p__Verrucomicrobia;c__Verruco-5":0.0,"k__Bacteria;p__Verrucomicrobia;c__[Pedosphaerae]":0.0,"k__Bacteria;p__WS6;c__SC72":0.0,"k__Bacteria;p__WWE1;c__[Cloacamonae]":0.0,"k__Bacteria;p__[Thermi];c__Deinococci":0.0,"Process Day":"15","arsenite add.":"As0","plant no.":"#01","plant type":"Biogas"},{"index":"U341F-U806R-P1-NW4-1-36-88","k__Archaea;p__Euryarchaeota;c__Methanobacteria":20.0,"k__Archaea;p__Euryarchaeota;c__Methanomicrobia":145.0,"k__Archaea;p__Euryarchaeota;c__Thermoplasmata":8.0,"k__Bacteria;__;__":56.0,"k__Bacteria;p__;c__":0.0,"k__Bacteria;p__Acidobacteria;c__BPC102":0.0,"k__Bacteria;p__Acidobacteria;c__Sva0725":0.0,"k__Bacteria;p__Acidobacteria;c__[Chloracidobacteria]":0.0,"k__Bacteria;p__Actinobacteria;c__":0.0,"k__Bacteria;p__Actinobacteria;c__Acidimicrobiia":0.0,"k__Bacteria;p__Actinobacteria;c__Actinobacteria":0.0,"k__Bacteria;p__Actinobacteria;c__Thermoleophilia":0.0,"k__Bacteria;p__Bacteroidetes;__":903.0,"k__Bacteria;p__Bacteroidetes;c__Bacteroidia":826.0,"k__Bacteria;p__Bacteroidetes;c__Cytophagia":109.0,"k__Bacteria;p__Bacteroidetes;c__Flavobacteriia":0.0,"k__Bacteria;p__Bacteroidetes;c__Sphingobacteriia":0.0,"k__Bacteria;p__Bacteroidetes;c__[Saprospirae]":0.0,"k__Bacteria;p__Caldiserica;c__OP5":0.0,"k__Bacteria;p__Caldiserica;c__TTA-B1":0.0,"k__Bacteria;p__Chlorobi;c__SJA-28":0.0,"k__Bacteria;p__Chloroflexi;c__":0.0,"k__Bacteria;p__Chloroflexi;c__Anaerolineae":0.0,"k__Bacteria;p__Chloroflexi;c__Ellin6529":0.0,"k__Bacteria;p__Chloroflexi;c__SHA-26":0.0,"k__Bacteria;p__Cyanobacteria;c__4C0d-2":0.0,"k__Bacteria;p__Cyanobacteria;c__Chloroplast":0.0,"k__Bacteria;p__EM3;c__":0.0,"k__Bacteria;p__Fibrobacteres;c__TG3":105.0,"k__Bacteria;p__Firmicutes;c__Bacilli":53.0,"k__Bacteria;p__Firmicutes;c__Clostridia":8108.0,"k__Bacteria;p__Firmicutes;c__Erysipelotrichi":0.0,"k__Bacteria;p__Firmicutes;c__OPB54":146.0,"k__Bacteria;p__NKB19;__":0.0,"k__Bacteria;p__NKB19;c__TSBW08":0.0,"k__Bacteria;p__OD1;c__":0.0,"k__Bacteria;p__OD1;c__ABY1":0.0,"k__Bacteria;p__OP1;c__OPB14":0.0,"k__Bacteria;p__OP8;c__OP8_1":0.0,"k__Bacteria;p__OP9;c__JS1":0.0,"k__Bacteria;p__OP9;c__OPB46":54.0,"k__Bacteria;p__Proteobacteria;__":0.0,"k__Bacteria;p__Proteobacteria;c__Alphaproteobacteria":0.0,"k__Bacteria;p__Proteobacteria;c__Betaproteobacteria":0.0,"k__Bacteria;p__Proteobacteria;c__Deltaproteobacteria":0.0,"k__Bacteria;p__Proteobacteria;c__Epsilonproteobacteria":0.0,"k__Bacteria;p__Proteobacteria;c__Gammaproteobacteria":0.0,"k__Bacteria;p__SAR406;c__AB16":0.0,"k__Bacteria;p__SR1;c__":0.0,"k__Bacteria;p__Spirochaetes;c__Spirochaetes":0.0,"k__Bacteria;p__Spirochaetes;c__[Brachyspirae]":0.0,"k__Bacteria;p__Spirochaetes;c__[Leptospirae]":0.0,"k__Bacteria;p__Synergistetes;c__Synergistia":128.0,"k__Bacteria;p__TA06;c__":0.0,"k__Bacteria;p__TM6;c__SJA-4":0.0,"k__Bacteria;p__TM7;c__TM7-1":0.0,"k__Bacteria;p__TM7;c__TM7-3":0.0,"k__Bacteria;p__Tenericutes;c__Mollicutes":0.0,"k__Bacteria;p__Tenericutes;c__RF3":376.0,"k__Bacteria;p__Thermotogae;c__Thermotogae":536.0,"k__Bacteria;p__Verrucomicrobia;c__Verruco-5":0.0,"k__Bacteria;p__Verrucomicrobia;c__[Pedosphaerae]":0.0,"k__Bacteria;p__WS6;c__SC72":0.0,"k__Bacteria;p__WWE1;c__[Cloacamonae]":10.0,"k__Bacteria;p__[Thermi];c__Deinococci":0.0,"Process Day":"15","arsenite add.":"As30","plant no.":"#01","plant type":"Biogas"},{"index":"U341F-U806R-P1-NW4-1-36-89","k__Archaea;p__Euryarchaeota;c__Methanobacteria":20.0,"k__Archaea;p__Euryarchaeota;c__Methanomicrobia":269.0,"k__Archaea;p__Euryarchaeota;c__Thermoplasmata":6.0,"k__Bacteria;__;__":61.0,"k__Bacteria;p__;c__":0.0,"k__Bacteria;p__Acidobacteria;c__BPC102":0.0,"k__Bacteria;p__Acidobacteria;c__Sva0725":0.0,"k__Bacteria;p__Acidobacteria;c__[Chloracidobacteria]":0.0,"k__Bacteria;p__Actinobacteria;c__":0.0,"k__Bacteria;p__Actinobacteria;c__Acidimicrobiia":0.0,"k__Bacteria;p__Actinobacteria;c__Actinobacteria":41.0,"k__Bacteria;p__Actinobacteria;c__Thermoleophilia":0.0,"k__Bacteria;p__Bacteroidetes;__":1457.0,"k__Bacteria;p__Bacteroidetes;c__Bacteroidia":1048.0,"k__Bacteria;p__Bacteroidetes;c__Cytophagia":191.0,"k__Bacteria;p__Bacteroidetes;c__Flavobacteriia":0.0,"k__Bacteria;p__Bacteroidetes;c__Sphingobacteriia":0.0,"k__Bacteria;p__Bacteroidetes;c__[Saprospirae]":0.0,"k__Bacteria;p__Caldiserica;c__OP5":0.0,"k__Bacteria;p__Caldiserica;c__TTA-B1":0.0,"k__Bacteria;p__Chlorobi;c__SJA-28":0.0,"k__Bacteria;p__Chloroflexi;c__":0.0,"k__Bacteria;p__Chloroflexi;c__Anaerolineae":0.0,"k__Bacteria;p__Chloroflexi;c__Ellin6529":0.0,"k__Bacteria;p__Chloroflexi;c__SHA-26":0.0,"k__Bacteria;p__Cyanobacteria;c__4C0d-2":0.0,"k__Bacteria;p__Cyanobacteria;c__Chloroplast":0.0,"k__Bacteria;p__EM3;c__":0.0,"k__Bacteria;p__Fibrobacteres;c__TG3":64.0,"k__Bacteria;p__Firmicutes;c__Bacilli":42.0,"k__Bacteria;p__Firmicutes;c__Clostridia":10338.0,"k__Bacteria;p__Firmicutes;c__Erysipelotrichi":0.0,"k__Bacteria;p__Firmicutes;c__OPB54":141.0,"k__Bacteria;p__NKB19;__":0.0,"k__Bacteria;p__NKB19;c__TSBW08":0.0,"k__Bacteria;p__OD1;c__":0.0,"k__Bacteria;p__OD1;c__ABY1":0.0,"k__Bacteria;p__OP1;c__OPB14":0.0,"k__Bacteria;p__OP8;c__OP8_1":0.0,"k__Bacteria;p__OP9;c__JS1":0.0,"k__Bacteria;p__OP9;c__OPB46":43.0,"k__Bacteria;p__Proteobacteria;__":0.0,"k__Bacteria;p__Proteobacteria;c__Alphaproteobacteria":0.0,"k__Bacteria;p__Proteobacteria;c__Betaproteobacteria":0.0,"k__Bacteria;p__Proteobacteria;c__Deltaproteobacteria":0.0,"k__Bacteria;p__Proteobacteria;c__Epsilonproteobacteria":0.0,"k__Bacteria;p__Proteobacteria;c__Gammaproteobacteria":0.0,"k__Bacteria;p__SAR406;c__AB16":0.0,"k__Bacteria;p__SR1;c__":0.0,"k__Bacteria;p__Spirochaetes;c__Spirochaetes":4.0,"k__Bacteria;p__Spirochaetes;c__[Brachyspirae]":0.0,"k__Bacteria;p__Spirochaetes;c__[Leptospirae]":0.0,"k__Bacteria;p__Synergistetes;c__Synergistia":188.0,"k__Bacteria;p__TA06;c__":0.0,"k__Bacteria;p__TM6;c__SJA-4":0.0,"k__Bacteria;p__TM7;c__TM7-1":0.0,"k__Bacteria;p__TM7;c__TM7-3":0.0,"k__Bacteria;p__Tenericutes;c__Mollicutes":0.0,"k__Bacteria;p__Tenericutes;c__RF3":333.0,"k__Bacteria;p__Thermotogae;c__Thermotogae":1008.0,"k__Bacteria;p__Verrucomicrobia;c__Verruco-5":0.0,"k__Bacteria;p__Verrucomicrobia;c__[Pedosphaerae]":0.0,"k__Bacteria;p__WS6;c__SC72":0.0,"k__Bacteria;p__WWE1;c__[Cloacamonae]":0.0,"k__Bacteria;p__[Thermi];c__Deinococci":0.0,"Process Day":"15","arsenite add.":"As30","plant no.":"#01","plant type":"Biogas"},{"index":"U341F-U806R-P1-NW4-1-38-94","k__Archaea;p__Euryarchaeota;c__Methanobacteria":0.0,"k__Archaea;p__Euryarchaeota;c__Methanomicrobia":82.0,"k__Archaea;p__Euryarchaeota;c__Thermoplasmata":0.0,"k__Bacteria;__;__":0.0,"k__Bacteria;p__;c__":0.0,"k__Bacteria;p__Acidobacteria;c__BPC102":0.0,"k__Bacteria;p__Acidobacteria;c__Sva0725":0.0,"k__Bacteria;p__Acidobacteria;c__[Chloracidobacteria]":0.0,"k__Bacteria;p__Actinobacteria;c__":0.0,"k__Bacteria;p__Actinobacteria;c__Acidimicrobiia":0.0,"k__Bacteria;p__Actinobacteria;c__Actinobacteria":10.0,"k__Bacteria;p__Actinobacteria;c__Thermoleophilia":0.0,"k__Bacteria;p__Bacteroidetes;__":657.0,"k__Bacteria;p__Bacteroidetes;c__Bacteroidia":469.0,"k__Bacteria;p__Bacteroidetes;c__Cytophagia":92.0,"k__Bacteria;p__Bacteroidetes;c__Flavobacteriia":0.0,"k__Bacteria;p__Bacteroidetes;c__Sphingobacteriia":0.0,"k__Bacteria;p__Bacteroidetes;c__[Saprospirae]":0.0,"k__Bacteria;p__Caldiserica;c__OP5":0.0,"k__Bacteria;p__Caldiserica;c__TTA-B1":0.0,"k__Bacteria;p__Chlorobi;c__SJA-28":0.0,"k__Bacteria;p__Chloroflexi;c__":0.0,"k__Bacteria;p__Chloroflexi;c__Anaerolineae":0.0,"k__Bacteria;p__Chloroflexi;c__Ellin6529":0.0,"k__Bacteria;p__Chloroflexi;c__SHA-26":0.0,"k__Bacteria;p__Cyanobacteria;c__4C0d-2":0.0,"k__Bacteria;p__Cyanobacteria;c__Chloroplast":0.0,"k__Bacteria;p__EM3;c__":0.0,"k__Bacteria;p__Fibrobacteres;c__TG3":12.0,"k__Bacteria;p__Firmicutes;c__Bacilli":47.0,"k__Bacteria;p__Firmicutes;c__Clostridia":3269.0,"k__Bacteria;p__Firmicutes;c__Erysipelotrichi":0.0,"k__Bacteria;p__Firmicutes;c__OPB54":45.0,"k__Bacteria;p__NKB19;__":0.0,"k__Bacteria;p__NKB19;c__TSBW08":0.0,"k__Bacteria;p__OD1;c__":0.0,"k__Bacteria;p__OD1;c__ABY1":0.0,"k__Bacteria;p__OP1;c__OPB14":0.0,"k__Bacteria;p__OP8;c__OP8_1":0.0,"k__Bacteria;p__OP9;c__JS1":0.0,"k__Bacteria;p__OP9;c__OPB46":37.0,"k__Bacteria;p__Proteobacteria;__":0.0,"k__Bacteria;p__Proteobacteria;c__Alphaproteobacteria":9.0,"k__Bacteria;p__Proteobacteria;c__Betaproteobacteria":0.0,"k__Bacteria;p__Proteobacteria;c__Deltaproteobacteria":0.0,"k__Bacteria;p__Proteobacteria;c__Epsilonproteobacteria":0.0,"k__Bacteria;p__Proteobacteria;c__Gammaproteobacteria":0.0,"k__Bacteria;p__SAR406;c__AB16":0.0,"k__Bacteria;p__SR1;c__":0.0,"k__Bacteria;p__Spirochaetes;c__Spirochaetes":0.0,"k__Bacteria;p__Spirochaetes;c__[Brachyspirae]":0.0,"k__Bacteria;p__Spirochaetes;c__[Leptospirae]":0.0,"k__Bacteria;p__Synergistetes;c__Synergistia":68.0,"k__Bacteria;p__TA06;c__":0.0,"k__Bacteria;p__TM6;c__SJA-4":0.0,"k__Bacteria;p__TM7;c__TM7-1":0.0,"k__Bacteria;p__TM7;c__TM7-3":0.0,"k__Bacteria;p__Tenericutes;c__Mollicutes":0.0,"k__Bacteria;p__Tenericutes;c__RF3":127.0,"k__Bacteria;p__Thermotogae;c__Thermotogae":544.0,"k__Bacteria;p__Verrucomicrobia;c__Verruco-5":0.0,"k__Bacteria;p__Verrucomicrobia;c__[Pedosphaerae]":0.0,"k__Bacteria;p__WS6;c__SC72":0.0,"k__Bacteria;p__WWE1;c__[Cloacamonae]":0.0,"k__Bacteria;p__[Thermi];c__Deinococci":0.0,"Process Day":"15","arsenite add.":"As60","plant no.":"#01","plant type":"Biogas"},{"index":"U341F-U806R-P1-NW4-1-38-95","k__Archaea;p__Euryarchaeota;c__Methanobacteria":10.0,"k__Archaea;p__Euryarchaeota;c__Methanomicrobia":178.0,"k__Archaea;p__Euryarchaeota;c__Thermoplasmata":0.0,"k__Bacteria;__;__":2.0,"k__Bacteria;p__;c__":0.0,"k__Bacteria;p__Acidobacteria;c__BPC102":0.0,"k__Bacteria;p__Acidobacteria;c__Sva0725":0.0,"k__Bacteria;p__Acidobacteria;c__[Chloracidobacteria]":0.0,"k__Bacteria;p__Actinobacteria;c__":0.0,"k__Bacteria;p__Actinobacteria;c__Acidimicrobiia":0.0,"k__Bacteria;p__Actinobacteria;c__Actinobacteria":0.0,"k__Bacteria;p__Actinobacteria;c__Thermoleophilia":0.0,"k__Bacteria;p__Bacteroidetes;__":1279.0,"k__Bacteria;p__Bacteroidetes;c__Bacteroidia":1128.0,"k__Bacteria;p__Bacteroidetes;c__Cytophagia":159.0,"k__Bacteria;p__Bacteroidetes;c__Flavobacteriia":0.0,"k__Bacteria;p__Bacteroidetes;c__Sphingobacteriia":0.0,"k__Bacteria;p__Bacteroidetes;c__[Saprospirae]":0.0,"k__Bacteria;p__Caldiserica;c__OP5":0.0,"k__Bacteria;p__Caldiserica;c__TTA-B1":0.0,"k__Bacteria;p__Chlorobi;c__SJA-28":0.0,"k__Bacteria;p__Chloroflexi;c__":0.0,"k__Bacteria;p__Chloroflexi;c__Anaerolineae":0.0,"k__Bacteria;p__Chloroflexi;c__Ellin6529":0.0,"k__Bacteria;p__Chloroflexi;c__SHA-26":0.0,"k__Bacteria;p__Cyanobacteria;c__4C0d-2":0.0,"k__Bacteria;p__Cyanobacteria;c__Chloroplast":0.0,"k__Bacteria;p__EM3;c__":0.0,"k__Bacteria;p__Fibrobacteres;c__TG3":24.0,"k__Bacteria;p__Firmicutes;c__Bacilli":28.0,"k__Bacteria;p__Firmicutes;c__Clostridia":4009.0,"k__Bacteria;p__Firmicutes;c__Erysipelotrichi":0.0,"k__Bacteria;p__Firmicutes;c__OPB54":79.0,"k__Bacteria;p__NKB19;__":0.0,"k__Bacteria;p__NKB19;c__TSBW08":0.0,"k__Bacteria;p__OD1;c__":0.0,"k__Bacteria;p__OD1;c__ABY1":0.0,"k__Bacteria;p__OP1;c__OPB14":0.0,"k__Bacteria;p__OP8;c__OP8_1":0.0,"k__Bacteria;p__OP9;c__JS1":0.0,"k__Bacteria;p__OP9;c__OPB46":52.0,"k__Bacteria;p__Proteobacteria;__":0.0,"k__Bacteria;p__Proteobacteria;c__Alphaproteobacteria":0.0,"k__Bacteria;p__Proteobacteria;c__Betaproteobacteria":0.0,"k__Bacteria;p__Proteobacteria;c__Deltaproteobacteria":0.0,"k__Bacteria;p__Proteobacteria;c__Epsilonproteobacteria":0.0,"k__Bacteria;p__Proteobacteria;c__Gammaproteobacteria":0.0,"k__Bacteria;p__SAR406;c__AB16":0.0,"k__Bacteria;p__SR1;c__":0.0,"k__Bacteria;p__Spirochaetes;c__Spirochaetes":0.0,"k__Bacteria;p__Spirochaetes;c__[Brachyspirae]":0.0,"k__Bacteria;p__Spirochaetes;c__[Leptospirae]":0.0,"k__Bacteria;p__Synergistetes;c__Synergistia":96.0,"k__Bacteria;p__TA06;c__":0.0,"k__Bacteria;p__TM6;c__SJA-4":0.0,"k__Bacteria;p__TM7;c__TM7-1":0.0,"k__Bacteria;p__TM7;c__TM7-3":0.0,"k__Bacteria;p__Tenericutes;c__Mollicutes":0.0,"k__Bacteria;p__Tenericutes;c__RF3":231.0,"k__Bacteria;p__Thermotogae;c__Thermotogae":637.0,"k__Bacteria;p__Verrucomicrobia;c__Verruco-5":0.0,"k__Bacteria;p__Verrucomicrobia;c__[Pedosphaerae]":0.0,"k__Bacteria;p__WS6;c__SC72":0.0,"k__Bacteria;p__WWE1;c__[Cloacamonae]":0.0,"k__Bacteria;p__[Thermi];c__Deinococci":9.0,"Process Day":"15","arsenite add.":"As60","plant no.":"#01","plant type":"Biogas"}]);
