# Supplementary material for: Arsenic metabolism in technical biogas plants: possible consequences for resident microbiota and downstream units
Source: AMB Express. 2019 Nov 28;9:190. doi: 10.1186/s13568-019-0902-6 (PMC6882981; doi:10.1186/s13568-019-0902-6)
Supplement: Supplementary file 3 — Additional file 3. Additional electronic material (Qiime2 files). [file 13568_2019_902_MOESM3_ESM.qzv › efce6f8b-9ad8-46e7-a1e4-5087d1d706a9/data/level-4.csv]

index	k__Archaea;p__Euryarchaeota;c__Methanobacteria;o__Methanobacteriales	k__Archaea;p__Euryarchaeota;c__Methanomicrobia;o__Methanomicrobiales	k__Archaea;p__Euryarchaeota;c__Methanomicrobia;o__Methanosarcinales	k__Archaea;p__Euryarchaeota;c__Thermoplasmata;o__E2	k__Bacteria;__;__;__	k__Bacteria;p__;c__;o__	k__Bacteria;p__Acidobacteria;c__BPC102;o__B110	k__Bacteria;p__Acidobacteria;c__BPC102;o__MVS-40	k__Bacteria;p__Acidobacteria;c__Sva0725;o__Sva0725	k__Bacteria;p__Acidobacteria;c__[Chloracidobacteria];o__RB41	k__Bacteria;p__Actinobacteria;c__;o__	k__Bacteria;p__Actinobacteria;c__Acidimicrobiia;o__Acidimicrobiales	k__Bacteria;p__Actinobacteria;c__Actinobacteria;o__Actinomycetales	k__Bacteria;p__Actinobacteria;c__Actinobacteria;o__WCHB1-81	k__Bacteria;p__Actinobacteria;c__Thermoleophilia;o__Gaiellales	k__Bacteria;p__Actinobacteria;c__Thermoleophilia;o__Solirubrobacterales	k__Bacteria;p__Bacteroidetes;__;__	k__Bacteria;p__Bacteroidetes;c__Bacteroidia;o__Bacteroidales	k__Bacteria;p__Bacteroidetes;c__Cytophagia;o__Cytophagales	k__Bacteria;p__Bacteroidetes;c__Flavobacteriia;o__Flavobacteriales	k__Bacteria;p__Bacteroidetes;c__Sphingobacteriia;o__Sphingobacteriales	k__Bacteria;p__Bacteroidetes;c__[Saprospirae];o__[Saprospirales]	k__Bacteria;p__Caldiserica;c__OP5;o__WCHB1-02	k__Bacteria;p__Caldiserica;c__TTA-B1;o__	k__Bacteria;p__Chlorobi;c__SJA-28;o__	k__Bacteria;p__Chloroflexi;c__;o__	k__Bacteria;p__Chloroflexi;c__Anaerolineae;o__	k__Bacteria;p__Chloroflexi;c__Anaerolineae;o__Anaerolineales	k__Bacteria;p__Chloroflexi;c__Anaerolineae;o__Caldilineales	k__Bacteria;p__Chloroflexi;c__Anaerolineae;o__OPB11	k__Bacteria;p__Chloroflexi;c__Anaerolineae;o__SHA-20	k__Bacteria;p__Chloroflexi;c__Anaerolineae;o__WCHB1-50	k__Bacteria;p__Chloroflexi;c__Ellin6529;o__	k__Bacteria;p__Chloroflexi;c__SHA-26;o__	k__Bacteria;p__Cyanobacteria;c__4C0d-2;o__MLE1-12	k__Bacteria;p__Cyanobacteria;c__Chloroplast;o__Chlorophyta	k__Bacteria;p__EM3;c__;o__	k__Bacteria;p__Fibrobacteres;c__TG3;o__TG3-1	k__Bacteria;p__Firmicutes;c__Bacilli;o__Bacillales	k__Bacteria;p__Firmicutes;c__Bacilli;o__Lactobacillales	k__Bacteria;p__Firmicutes;c__Bacilli;o__Turicibacterales	k__Bacteria;p__Firmicutes;c__Clostridia;__	k__Bacteria;p__Firmicutes;c__Clostridia;o__	k__Bacteria;p__Firmicutes;c__Clostridia;o__BSA2B-08	k__Bacteria;p__Firmicutes;c__Clostridia;o__Clostridiales	k__Bacteria;p__Firmicutes;c__Clostridia;o__Halanaerobiales	k__Bacteria;p__Firmicutes;c__Clostridia;o__MBA08	k__Bacteria;p__Firmicutes;c__Clostridia;o__Natranaerobiales	k__Bacteria;p__Firmicutes;c__Clostridia;o__OPB54
U341F-U806R-P1-NW4-1-14-40	25.0	95.0	442.0	0.0	23.0	5.0	0.0	0.0	26.0	0.0	13.0	63.0	209.0	9.0	0.0	0.0	85.0	1671.0	0.0	0.0	10.0	58.0	14.0	23.0	0.0	15.0	0.0	208.0	0.0	9.0	23.0	0.0	0.0	0.0	0.0	0.0	117.0	0.0	0.0	40.0	0.0	0.0	0.0	0.0	598.0	0.0	0.0	0.0	14.0
U341F-U806R-P1-NW4-1-14-41	51.0	142.0	1355.0	0.0	40.0	10.0	0.0	13.0	54.0	6.0	14.0	170.0	578.0	36.0	4.0	16.0	133.0	3457.0	0.0	30.0	0.0	113.0	66.0	71.0	33.0	0.0	0.0	546.0	50.0	19.0	29.0	0.0	7.0	0.0	8.0	0.0	332.0	0.0	0.0	68.0	8.0	0.0	0.0	0.0	1838.0	0.0	22.0	0.0	16.0
U341F-U806R-P1-NW4-1-27-100	17.0	182.0	728.0	15.0	58.0	19.0	7.0	6.0	35.0	0.0	54.0	47.0	334.0	36.0	0.0	23.0	115.0	5956.0	0.0	6.0	0.0	0.0	136.0	187.0	0.0	0.0	0.0	1194.0	0.0	20.0	17.0	0.0	0.0	0.0	0.0	0.0	754.0	0.0	0.0	0.0	13.0	0.0	4.0	0.0	802.0	0.0	0.0	0.0	14.0
U341F-U806R-P1-NW4-1-29-104	0.0	130.0	150.0	10.0	171.0	51.0	0.0	6.0	134.0	0.0	93.0	72.0	599.0	24.0	17.0	46.0	321.0	5467.0	0.0	15.0	0.0	3.0	134.0	320.0	0.0	0.0	0.0	679.0	30.0	32.0	39.0	3.0	0.0	5.0	0.0	4.0	343.0	0.0	0.0	0.0	44.0	0.0	0.0	0.0	3006.0	0.0	0.0	0.0	15.0
U341F-U806R-P1-NW4-1-31-108	0.0	185.0	72.0	0.0	22.0	0.0	0.0	0.0	16.0	0.0	15.0	38.0	244.0	10.0	9.0	18.0	80.0	3601.0	0.0	6.0	0.0	0.0	56.0	63.0	0.0	0.0	0.0	708.0	0.0	9.0	0.0	0.0	0.0	0.0	0.0	0.0	588.0	0.0	0.0	0.0	0.0	0.0	0.0	0.0	594.0	0.0	0.0	0.0	9.0
U341F-U806R-P1-NW4-1-31-109	0.0	97.0	129.0	0.0	18.0	13.0	0.0	0.0	18.0	0.0	14.0	37.0	195.0	18.0	9.0	17.0	58.0	3316.0	0.0	0.0	0.0	0.0	66.0	147.0	0.0	0.0	6.0	1060.0	14.0	0.0	0.0	0.0	0.0	0.0	0.0	0.0	698.0	0.0	0.0	0.0	0.0	2.0	0.0	0.0	718.0	0.0	0.0	0.0	0.0
U341F-U806R-P1-NW4-1-33-79	87.0	228.0	22.0	9.0	30.0	0.0	0.0	0.0	0.0	0.0	0.0	0.0	22.0	0.0	0.0	0.0	1934.0	1147.0	258.0	0.0	0.0	0.0	0.0	0.0	0.0	0.0	0.0	0.0	0.0	0.0	0.0	0.0	0.0	0.0	0.0	0.0	0.0	0.0	0.0	67.0	15.0	10.0	14.0	10.0	3897.0	369.0	6250.0	82.0	94.0
U341F-U806R-P1-NW4-1-33-80	52.0	111.0	14.0	0.0	16.0	0.0	0.0	0.0	0.0	0.0	0.0	0.0	14.0	0.0	0.0	0.0	1241.0	765.0	153.0	0.0	0.0	0.0	0.0	0.0	0.0	0.0	0.0	0.0	0.0	0.0	0.0	0.0	0.0	0.0	0.0	0.0	0.0	0.0	0.0	62.0	12.0	15.0	9.0	0.0	2054.0	209.0	4926.0	91.0	34.0
U341F-U806R-P1-NW4-1-34-82	27.0	82.0	8.0	0.0	28.0	0.0	0.0	0.0	0.0	0.0	0.0	0.0	0.0	0.0	0.0	0.0	492.0	604.0	0.0	0.0	0.0	0.0	0.0	0.0	0.0	0.0	0.0	0.0	0.0	0.0	0.0	0.0	0.0	0.0	0.0	0.0	0.0	42.0	0.0	16.0	0.0	0.0	0.0	0.0	387.0	8.0	2293.0	25.0	12.0
U341F-U806R-P1-NW4-1-34-83	49.0	135.0	8.0	0.0	55.0	0.0	0.0	0.0	0.0	0.0	0.0	0.0	23.0	0.0	0.0	0.0	745.0	962.0	107.0	0.0	0.0	0.0	0.0	0.0	0.0	0.0	0.0	0.0	0.0	0.0	0.0	0.0	0.0	0.0	0.0	0.0	0.0	48.0	0.0	16.0	0.0	3.0	7.0	0.0	686.0	8.0	4162.0	32.0	24.0
U341F-U806R-P1-NW4-1-36-88	20.0	121.0	24.0	8.0	56.0	0.0	0.0	0.0	0.0	0.0	0.0	0.0	0.0	0.0	0.0	0.0	903.0	826.0	109.0	0.0	0.0	0.0	0.0	0.0	0.0	0.0	0.0	0.0	0.0	0.0	0.0	0.0	0.0	0.0	0.0	0.0	0.0	105.0	0.0	43.0	10.0	0.0	34.0	33.0	1318.0	26.0	5144.0	37.0	115.0
U341F-U806R-P1-NW4-1-36-89	20.0	246.0	23.0	6.0	61.0	0.0	0.0	0.0	0.0	0.0	0.0	0.0	41.0	0.0	0.0	0.0	1457.0	1048.0	191.0	0.0	0.0	0.0	0.0	0.0	0.0	0.0	0.0	0.0	0.0	0.0	0.0	0.0	0.0	0.0	0.0	0.0	0.0	64.0	7.0	35.0	0.0	5.0	30.0	30.0	1376.0	14.0	7276.0	76.0	64.0
U341F-U806R-P1-NW4-1-38-94	0.0	75.0	7.0	0.0	0.0	0.0	0.0	0.0	0.0	0.0	0.0	0.0	10.0	0.0	0.0	0.0	657.0	469.0	92.0	0.0	0.0	0.0	0.0	0.0	0.0	0.0	0.0	0.0	0.0	0.0	0.0	0.0	0.0	0.0	0.0	0.0	0.0	12.0	9.0	38.0	0.0	0.0	0.0	0.0	628.0	17.0	2149.0	15.0	23.0
U341F-U806R-P1-NW4-1-38-95	10.0	159.0	19.0	0.0	2.0	0.0	0.0	0.0	0.0	0.0	0.0	0.0	0.0	0.0	0.0	0.0	1279.0	1128.0	159.0	0.0	0.0	0.0	0.0	0.0	0.0	0.0	0.0	0.0	0.0	0.0	0.0	0.0	0.0	0.0	0.0	0.0	0.0	24.0	0.0	28.0	0.0	0.0	0.0	0.0	997.0	26.0	2307.0	31.0	0.0
[truncated: 56 more columns]
