# Supplementary material for: Arsenic metabolism in technical biogas plants: possible consequences for resident microbiota and downstream units
Source: AMB Express. 2019 Nov 28;9:190. doi: 10.1186/s13568-019-0902-6 (PMC6882981; doi:10.1186/s13568-019-0902-6)
Supplement: Supplementary file 3 — Additional file 3. Additional electronic material (Qiime2 files). [file 13568_2019_902_MOESM3_ESM.qzv › efce6f8b-9ad8-46e7-a1e4-5087d1d706a9/data/level-4.jsonp]

load_data(4,["k__Archaea;p__Euryarchaeota;c__Methanobacteria;o__Methanobacteriales", "k__Archaea;p__Euryarchaeota;c__Methanomicrobia;o__Methanomicrobiales", "k__Archaea;p__Euryarchaeota;c__Methanomicrobia;o__Methanosarcinales", "k__Archaea;p__Euryarchaeota;c__Thermoplasmata;o__E2", "k__Bacteria;__;__;__", "k__Bacteria;p__;c__;o__", "k__Bacteria;p__Acidobacteria;c__BPC102;o__B110", "k__Bacteria;p__Acidobacteria;c__BPC102;o__MVS-40", "k__Bacteria;p__Acidobacteria;c__Sva0725;o__Sva0725", "k__Bacteria;p__Acidobacteria;c__[Chloracidobacteria];o__RB41", "k__Bacteria;p__Actinobacteria;c__;o__", "k__Bacteria;p__Actinobacteria;c__Acidimicrobiia;o__Acidimicrobiales", "k__Bacteria;p__Actinobacteria;c__Actinobacteria;o__Actinomycetales", "k__Bacteria;p__Actinobacteria;c__Actinobacteria;o__WCHB1-81", "k__Bacteria;p__Actinobacteria;c__Thermoleophilia;o__Gaiellales", "k__Bacteria;p__Actinobacteria;c__Thermoleophilia;o__Solirubrobacterales", "k__Bacteria;p__Bacteroidetes;__;__", "k__Bacteria;p__Bacteroidetes;c__Bacteroidia;o__Bacteroidales", "k__Bacteria;p__Bacteroidetes;c__Cytophagia;o__Cytophagales", "k__Bacteria;p__Bacteroidetes;c__Flavobacteriia;o__Flavobacteriales", "k__Bacteria;p__Bacteroidetes;c__Sphingobacteriia;o__Sphingobacteriales", "k__Bacteria;p__Bacteroidetes;c__[Saprospirae];o__[Saprospirales]", "k__Bacteria;p__Caldiserica;c__OP5;o__WCHB1-02", "k__Bacteria;p__Caldiserica;c__TTA-B1;o__", "k__Bacteria;p__Chlorobi;c__SJA-28;o__", "k__Bacteria;p__Chloroflexi;c__;o__", "k__Bacteria;p__Chloroflexi;c__Anaerolineae;o__", "k__Bacteria;p__Chloroflexi;c__Anaerolineae;o__Anaerolineales", "k__Bacteria;p__Chloroflexi;c__Anaerolineae;o__Caldilineales", "k__Bacteria;p__Chloroflexi;c__Anaerolineae;o__OPB11", "k__Bacteria;p__Chloroflexi;c__Anaerolineae;o__SHA-20", "k__Bacteria;p__Chloroflexi;c__Anaerolineae;o__WCHB1-50", "k__Bacteria;p__Chloroflexi;c__Ellin6529;o__", "k__Bacteria;p__Chloroflexi;c__SHA-26;o__", "k__Bacteria;p__Cyanobacteria;c__4C0d-2;o__MLE1-12", "k__Bacteria;p__Cyanobacteria;c__Chloroplast;o__Chlorophyta", "k__Bacteria;p__EM3;c__;o__", "k__Bacteria;p__Fibrobacteres;c__TG3;o__TG3-1", "k__Bacteria;p__Firmicutes;c__Bacilli;o__Bacillales", "k__Bacteria;p__Firmicutes;c__Bacilli;o__Lactobacillales", "k__Bacteria;p__Firmicutes;c__Bacilli;o__Turicibacterales", "k__Bacteria;p__Firmicutes;c__Clostridia;__", "k__Bacteria;p__Firmicutes;c__Clostridia;o__", "k__Bacteria;p__Firmicutes;c__Clostridia;o__BSA2B-08", "k__Bacteria;p__Firmicutes;c__Clostridia;o__Clostridiales", "k__Bacteria;p__Firmicutes;c__Clostridia;o__Halanaerobiales", "k__Bacteria;p__Firmicutes;c__Clostridia;o__MBA08", "k__Bacteria;p__Firmicutes;c__Clostridia;o__Natranaerobiales", "k__Bacteria;p__Firmicutes;c__Clostridia;o__OPB54", "k__Bacteria;p__Firmicutes;c__Clostridia;o__SHA-98", "k__Bacteria;p__Firmicutes;c__Clostridia;o__Thermoanaerobacterales", "k__Bacteria;p__Firmicutes;c__Erysipelotrichi;o__Erysipelotrichales", "k__Bacteria;p__Firmicutes;c__OPB54;o__", "k__Bacteria;p__NKB19;__;__", "k__Bacteria;p__NKB19;c__TSBW08;o__", "k__Bacteria;p__OD1;c__;o__", "k__Bacteria;p__OD1;c__ABY1;o__", "k__Bacteria;p__OP1;c__OPB14;o__", "k__Bacteria;p__OP8;c__OP8_1;__", "k__Bacteria;p__OP8;c__OP8_1;o__", "k__Bacteria;p__OP9;c__JS1;o__BA021", "k__Bacteria;p__OP9;c__OPB46;o__OPB72", "k__Bacteria;p__OP9;c__OPB46;o__SHA-1", "k__Bacteria;p__Proteobacteria;__;__", "k__Bacteria;p__Proteobacteria;c__Alphaproteobacteria;o__Caulobacterales", "k__Bacteria;p__Proteobacteria;c__Alphaproteobacteria;o__Rhizobiales", "k__Bacteria;p__Proteobacteria;c__Alphaproteobacteria;o__Rhodobacterales", "k__Bacteria;p__Proteobacteria;c__Alphaproteobacteria;o__Rhodospirillales", "k__Bacteria;p__Proteobacteria;c__Alphaproteobacteria;o__Sphingomonadales", "k__Bacteria;p__Proteobacteria;c__Betaproteobacteria;__", "k__Bacteria;p__Proteobacteria;c__Betaproteobacteria;o__Burkholderiales", "k__Bacteria;p__Proteobacteria;c__Betaproteobacteria;o__Rhodocyclales", "k__Bacteria;p__Proteobacteria;c__Betaproteobacteria;o__SC-I-84", "k__Bacteria;p__Proteobacteria;c__Deltaproteobacteria;o__GW-28", "k__Bacteria;p__Proteobacteria;c__Deltaproteobacteria;o__Myxococcales", "k__Bacteria;p__Proteobacteria;c__Deltaproteobacteria;o__Syntrophobacterales", "k__Bacteria;p__Proteobacteria;c__Epsilonproteobacteria;o__Campylobacterales", "k__Bacteria;p__Proteobacteria;c__Gammaproteobacteria;o__Enterobacteriales", "k__Bacteria;p__Proteobacteria;c__Gammaproteobacteria;o__Pseudomonadales", "k__Bacteria;p__Proteobacteria;c__Gammaproteobacteria;o__Xanthomonadales", "k__Bacteria;p__SAR406;c__AB16;o__noFP_H7", "k__Bacteria;p__SR1;c__;o__", "k__Bacteria;p__Spirochaetes;c__Spirochaetes;o__M2PT2-76", "k__Bacteria;p__Spirochaetes;c__Spirochaetes;o__Spirochaetales", "k__Bacteria;p__Spirochaetes;c__[Brachyspirae];o__[Brachyspirales]", "k__Bacteria;p__Spirochaetes;c__[Leptospirae];o__[Leptospirales]", "k__Bacteria;p__Synergistetes;c__Synergistia;o__Synergistales", "k__Bacteria;p__TA06;c__;o__", "k__Bacteria;p__TM6;c__SJA-4;o__S1198", "k__Bacteria;p__TM7;c__TM7-1;o__", "k__Bacteria;p__TM7;c__TM7-3;__", "k__Bacteria;p__TM7;c__TM7-3;o__", "k__Bacteria;p__TM7;c__TM7-3;o__I025", "k__Bacteria;p__Tenericutes;c__Mollicutes;o__RF39", "k__Bacteria;p__Tenericutes;c__RF3;o__ML615J-28", "k__Bacteria;p__Thermotogae;c__Thermotogae;o__Thermotogales", "k__Bacteria;p__Verrucomicrobia;c__Verruco-5;o__LD1-PB3", "k__Bacteria;p__Verrucomicrobia;c__[Pedosphaerae];o__[Pedosphaerales]", "k__Bacteria;p__WS6;c__SC72;o__A-2AF", "k__Bacteria;p__WWE1;c__[Cloacamonae];o__[Cloacamonales]", "k__Bacteria;p__[Thermi];c__Deinococci;o__Deinococcales"],["index", "k__Archaea;p__Euryarchaeota;c__Methanobacteria;o__Methanobacteriales", "k__Archaea;p__Euryarchaeota;c__Methanomicrobia;o__Methanomicrobiales", "k__Archaea;p__Euryarchaeota;c__Methanomicrobia;o__Methanosarcinales", "k__Archaea;p__Euryarchaeota;c__Thermoplasmata;o__E2", "k__Bacteria;__;__;__", "k__Bacteria;p__;c__;o__", "k__Bacteria;p__Acidobacteria;c__BPC102;o__B110", "k__Bacteria;p__Acidobacteria;c__BPC102;o__MVS-40", "k__Bacteria;p__Acidobacteria;c__Sva0725;o__Sva0725", "k__Bacteria;p__Acidobacteria;c__[Chloracidobacteria];o__RB41", "k__Bacteria;p__Actinobacteria;c__;o__", "k__Bacteria;p__Actinobacteria;c__Acidimicrobiia;o__Acidimicrobiales", "k__Bacteria;p__Actinobacteria;c__Actinobacteria;o__Actinomycetales", "k__Bacteria;p__Actinobacteria;c__Actinobacteria;o__WCHB1-81", "k__Bacteria;p__Actinobacteria;c__Thermoleophilia;o__Gaiellales", "k__Bacteria;p__Actinobacteria;c__Thermoleophilia;o__Solirubrobacterales", "k__Bacteria;p__Bacteroidetes;__;__", "k__Bacteria;p__Bacteroidetes;c__Bacteroidia;o__Bacteroidales", "k__Bacteria;p__Bacteroidetes;c__Cytophagia;o__Cytophagales", "k__Bacteria;p__Bacteroidetes;c__Flavobacteriia;o__Flavobacteriales", "k__Bacteria;p__Bacteroidetes;c__Sphingobacteriia;o__Sphingobacteriales", "k__Bacteria;p__Bacteroidetes;c__[Saprospirae];o__[Saprospirales]", "k__Bacteria;p__Caldiserica;c__OP5;o__WCHB1-02", "k__Bacteria;p__Caldiserica;c__TTA-B1;o__", "k__Bacteria;p__Chlorobi;c__SJA-28;o__", "k__Bacteria;p__Chloroflexi;c__;o__", "k__Bacteria;p__Chloroflexi;c__Anaerolineae;o__", "k__Bacteria;p__Chloroflexi;c__Anaerolineae;o__Anaerolineales", "k__Bacteria;p__Chloroflexi;c__Anaerolineae;o__Caldilineales", "k__Bacteria;p__Chloroflexi;c__Anaerolineae;o__OPB11", "k__Bacteria;p__Chloroflexi;c__Anaerolineae;o__SHA-20", "k__Bacteria;p__Chloroflexi;c__Anaerolineae;o__WCHB1-50", "k__Bacteria;p__Chloroflexi;c__Ellin6529;o__", "k__Bacteria;p__Chloroflexi;c__SHA-26;o__", "k__Bacteria;p__Cyanobacteria;c__4C0d-2;o__MLE1-12", "k__Bacteria;p__Cyanobacteria;c__Chloroplast;o__Chlorophyta", "k__Bacteria;p__EM3;c__;o__", "k__Bacteria;p__Fibrobacteres;c__TG3;o__TG3-1", "k__Bacteria;p__Firmicutes;c__Bacilli;o__Bacillales", "k__Bacteria;p__Firmicutes;c__Bacilli;o__Lactobacillales", "k__Bacteria;p__Firmicutes;c__Bacilli;o__Turicibacterales", "k__Bacteria;p__Firmicutes;c__Clostridia;__", "k__Bacteria;p__Firmicutes;c__Clostridia;o__", "k__Bacteria;p__Firmicutes;c__Clostridia;o__BSA2B-08", "k__Bacteria;p__Firmicutes;c__Clostridia;o__Clostridiales", "k__Bacteria;p__Firmicutes;c__Clostridia;o__Halanaerobiales", "k__Bacteria;p__Firmicutes;c__Clostridia;o__MBA08", "k__Bacteria;p__Firmicutes;c__Clostridia;o__Natranaerobiales", "k__Bacteria;p__Firmicutes;c__Clostridia;o__OPB54", "k__Bacteria;p__Firmicutes;c__Clostridia;o__SHA-98", "k__Bacteria;p__Firmicutes;c__Clostridia;o__Thermoanaerobacterales", "k__Bacteria;p__Firmicutes;c__Erysipelotrichi;o__Erysipelotrichales", "k__Bacteria;p__Firmicutes;c__OPB54;o__", "k__Bacteria;p__NKB19;__;__", "k__Bacteria;p__NKB19;c__TSBW08;o__", "k__Bacteria;p__OD1;c__;o__", "k__Bacteria;p__OD1;c__ABY1;o__", "k__Bacteria;p__OP1;c__OPB14;o__", "k__Bacteria;p__OP8;c__OP8_1;__", "k__Bacteria;p__OP8;c__OP8_1;o__", "k__Bacteria;p__OP9;c__JS1;o__BA021", "k__Bacteria;p__OP9;c__OPB46;o__OPB72", "k__Bacteria;p__OP9;c__OPB46;o__SHA-1", "k__Bacteria;p__Proteobacteria;__;__", "k__Bacteria;p__Proteobacteria;c__Alphaproteobacteria;o__Caulobacterales", "k__Bacteria;p__Proteobacteria;c__Alphaproteobacteria;o__Rhizobiales", "k__Bacteria;p__Proteobacteria;c__Alphaproteobacteria;o__Rhodobacterales", "k__Bacteria;p__Proteobacteria;c__Alphaproteobacteria;o__Rhodospirillales", "k__Bacteria;p__Proteobacteria;c__Alphaproteobacteria;o__Sphingomonadales", "k__Bacteria;p__Proteobacteria;c__Betaproteobacteria;__", "k__Bacteria;p__Proteobacteria;c__Betaproteobacteria;o__Burkholderiales", "k__Bacteria;p__Proteobacteria;c__Betaproteobacteria;o__Rhodocyclales", "k__Bacteria;p__Proteobacteria;c__Betaproteobacteria;o__SC-I-84", "k__Bacteria;p__Proteobacteria;c__Deltaproteobacteria;o__GW-28", "k__Bacteria;p__Proteobacteria;c__Deltaproteobacteria;o__Myxococcales", "k__Bacteria;p__Proteobacteria;c__Deltaproteobacteria;o__Syntrophobacterales", "k__Bacteria;p__Proteobacteria;c__Epsilonproteobacteria;o__Campylobacterales", "k__Bacteria;p__Proteobacteria;c__Gammaproteobacteria;o__Enterobacteriales", "k__Bacteria;p__Proteobacteria;c__Gammaproteobacteria;o__Pseudomonadales", "k__Bacteria;p__Proteobacteria;c__Gammaproteobacteria;o__Xanthomonadales", "k__Bacteria;p__SAR406;c__AB16;o__noFP_H7", "k__Bacteria;p__SR1;c__;o__", "k__Bacteria;p__Spirochaetes;c__Spirochaetes;o__M2PT2-76", "k__Bacteria;p__Spirochaetes;c__Spirochaetes;o__Spirochaetales", "k__Bacteria;p__Spirochaetes;c__[Brachyspirae];o__[Brachyspirales]", "k__Bacteria;p__Spirochaetes;c__[Leptospirae];o__[Leptospirales]", "k__Bacteria;p__Synergistetes;c__Synergistia;o__Synergistales", "k__Bacteria;p__TA06;c__;o__", "k__Bacteria;p__TM6;c__SJA-4;o__S1198", "k__Bacteria;p__TM7;c__TM7-1;o__", "k__Bacteria;p__TM7;c__TM7-3;__", "k__Bacteria;p__TM7;c__TM7-3;o__", "k__Bacteria;p__TM7;c__TM7-3;o__I025", "k__Bacteria;p__Tenericutes;c__Mollicutes;o__RF39", "k__Bacteria;p__Tenericutes;c__RF3;o__ML615J-28", "k__Bacteria;p__Thermotogae;c__Thermotogae;o__Thermotogales", "k__Bacteria;p__Verrucomicrobia;c__Verruco-5;o__LD1-PB3", "k__Bacteria;p__Verrucomicrobia;c__[Pedosphaerae];o__[Pedosphaerales]", "k__Bacteria;p__WS6;c__SC72;o__A-2AF", "k__Bacteria;p__WWE1;c__[Cloacamonae];o__[Cloacamonales]", "k__Bacteria;p__[Thermi];c__Deinococci;o__Deinococcales", "Process Day", "arsenite add.", "plant no.", "plant type"],[{"index":"U341F-U806R-P1-NW4-1-14-40","k__Archaea;p__Euryarchaeota;c__Methanobacteria;o__Methanobacteriales":25.0,"k__Archaea;p__Euryarchaeota;c__Methanomicrobia;o__Methanomicrobiales":95.0,"k__Archaea;p__Euryarchaeota;c__Methanomicrobia;o__Methanosarcinales":442.0,"k__Archaea;p__Euryarchaeota;c__Thermoplasmata;o__E2":0.0,"k__Bacteria;__;__;__":23.0,"k__Bacteria;p__;c__;o__":5.0,"k__Bacteria;p__Acidobacteria;c__BPC102;o__B110":0.0,"k__Bacteria;p__Acidobacteria;c__BPC102;o__MVS-40":0.0,"k__Bacteria;p__Acidobacteria;c__Sva0725;o__Sva0725":26.0,"k__Bacteria;p__Acidobacteria;c__[Chloracidobacteria];o__RB41":0.0,"k__Bacteria;p__Actinobacteria;c__;o__":13.0,"k__Bacteria;p__Actinobacteria;c__Acidimicrobiia;o__Acidimicrobiales":63.0,"k__Bacteria;p__Actinobacteria;c__Actinobacteria;o__Actinomycetales":209.0,"k__Bacteria;p__Actinobacteria;c__Actinobacteria;o__WCHB1-81":9.0,"k__Bacteria;p__Actinobacteria;c__Thermoleophilia;o__Gaiellales":0.0,"k__Bacteria;p__Actinobacteria;c__Thermoleophilia;o__Solirubrobacterales":0.0,"k__Bacteria;p__Bacteroidetes;__;__":85.0,"k__Bacteria;p__Bacteroidetes;c__Bacteroidia;o__Bacteroidales":1671.0,"k__Bacteria;p__Bacteroidetes;c__Cytophagia;o__Cytophagales":0.0,"k__Bacteria;p__Bacteroidetes;c__Flavobacteriia;o__Flavobacteriales":0.0,"k__Bacteria;p__Bacteroidetes;c__Sphingobacteriia;o__Sphingobacteriales":10.0,"k__Bacteria;p__Bacteroidetes;c__[Saprospirae];o__[Saprospirales]":58.0,"k__Bacteria;p__Caldiserica;c__OP5;o__WCHB1-02":14.0,"k__Bacteria;p__Caldiserica;c__TTA-B1;o__":23.0,"k__Bacteria;p__Chlorobi;c__SJA-28;o__":0.0,"k__Bacteria;p__Chloroflexi;c__;o__":15.0,"k__Bacteria;p__Chloroflexi;c__Anaerolineae;o__":0.0,"k__Bacteria;p__Chloroflexi;c__Anaerolineae;o__Anaerolineales":208.0,"k__Bacteria;p__Chloroflexi;c__Anaerolineae;o__Caldilineales":0.0,"k__Bacteria;p__Chloroflexi;c__Anaerolineae;o__OPB11":9.0,"k__Bacteria;p__Chloroflexi;c__Anaerolineae;o__SHA-20":23.0,"k__Bacteria;p__Chloroflexi;c__Anaerolineae;o__WCHB1-50":0.0,"k__Bacteria;p__Chloroflexi;c__Ellin6529;o__":0.0,"k__Bacteria;p__Chloroflexi;c__SHA-26;o__":0.0,"k__Bacteria;p__Cyanobacteria;c__4C0d-2;o__MLE1-12":0.0,"k__Bacteria;p__Cyanobacteria;c__Chloroplast;o__Chlorophyta":0.0,"k__Bacteria;p__EM3;c__;o__":117.0,"k__Bacteria;p__Fibrobacteres;c__TG3;o__TG3-1":0.0,"k__Bacteria;p__Firmicutes;c__Bacilli;o__Bacillales":0.0,"k__Bacteria;p__Firmicutes;c__Bacilli;o__Lactobacillales":40.0,"k__Bacteria;p__Firmicutes;c__Bacilli;o__Turicibacterales":0.0,"k__Bacteria;p__Firmicutes;c__Clostridia;__":0.0,"k__Bacteria;p__Firmicutes;c__Clostridia;o__":0.0,"k__Bacteria;p__Firmicutes;c__Clostridia;o__BSA2B-08":0.0,"k__Bacteria;p__Firmicutes;c__Clostridia;o__Clostridiales":598.0,"k__Bacteria;p__Firmicutes;c__Clostridia;o__Halanaerobiales":0.0,"k__Bacteria;p__Firmicutes;c__Clostridia;o__MBA08":0.0,"k__Bacteria;p__Firmicutes;c__Clostridia;o__Natranaerobiales":0.0,"k__Bacteria;p__Firmicutes;c__Clostridia;o__OPB54":14.0,"k__Bacteria;p__Firmicutes;c__Clostridia;o__SHA-98":201.0,"k__Bacteria;p__Firmicutes;c__Clostridia;o__Thermoanaerobacterales":0.0,"k__Bacteria;p__Firmicutes;c__Erysipelotrichi;o__Erysipelotrichales":0.0,"k__Bacteria;p__Firmicutes;c__OPB54;o__":0.0,"k__Bacteria;p__NKB19;__;__":0.0,"k__Bacteria;p__NKB19;c__TSBW08;o__":2.0,"k__Bacteria;p__OD1;c__;o__":35.0,"k__Bacteria;p__OD1;c__ABY1;o__":16.0,"k__Bacteria;p__OP1;c__OPB14;o__":0.0,"k__Bacteria;p__OP8;c__OP8_1;__":49.0,"k__Bacteria;p__OP8;c__OP8_1;o__":0.0,"k__Bacteria;p__OP9;c__JS1;o__BA021":0.0,"k__Bacteria;p__OP9;c__OPB46;o__OPB72":14.0,"k__Bacteria;p__OP9;c__OPB46;o__SHA-1":17.0,"k__Bacteria;p__Proteobacteria;__;__":0.0,"k__Bacteria;p__Proteobacteria;c__Alphaproteobacteria;o__Caulobacterales":0.0,"k__Bacteria;p__Proteobacteria;c__Alphaproteobacteria;o__Rhizobiales":0.0,"k__Bacteria;p__Proteobacteria;c__Alphaproteobacteria;o__Rhodobacterales":0.0,"k__Bacteria;p__Proteobacteria;c__Alphaproteobacteria;o__Rhodospirillales":0.0,"k__Bacteria;p__Proteobacteria;c__Alphaproteobacteria;o__Sphingomonadales":15.0,"k__Bacteria;p__Proteobacteria;c__Betaproteobacteria;__":0.0,"k__Bacteria;p__Proteobacteria;c__Betaproteobacteria;o__Burkholderiales":92.0,"k__Bacteria;p__Proteobacteria;c__Betaproteobacteria;o__Rhodocyclales":0.0,"k__Bacteria;p__Proteobacteria;c__Betaproteobacteria;o__SC-I-84":0.0,"k__Bacteria;p__Proteobacteria;c__Deltaproteobacteria;o__GW-28":0.0,"k__Bacteria;p__Proteobacteria;c__Deltaproteobacteria;o__Myxococcales":0.0,"k__Bacteria;p__Proteobacteria;c__Deltaproteobacteria;o__Syntrophobacterales":74.0,"k__Bacteria;p__Proteobacteria;c__Epsilonproteobacteria;o__Campylobacterales":11.0,"k__Bacteria;p__Proteobacteria;c__Gammaproteobacteria;o__Enterobacteriales":0.0,"k__Bacteria;p__Proteobacteria;c__Gammaproteobacteria;o__Pseudomonadales":0.0,"k__Bacteria;p__Proteobacteria;c__Gammaproteobacteria;o__Xanthomonadales":0.0,"k__Bacteria;p__SAR406;c__AB16;o__noFP_H7":9.0,"k__Bacteria;p__SR1;c__;o__":0.0,"k__Bacteria;p__Spirochaetes;c__Spirochaetes;o__M2PT2-76":0.0,"k__Bacteria;p__Spirochaetes;c__Spirochaetes;o__Spirochaetales":476.0,"k__Bacteria;p__Spirochaetes;c__[Brachyspirae];o__[Brachyspirales]":0.0,"k__Bacteria;p__Spirochaetes;c__[Leptospirae];o__[Leptospirales]":19.0,"k__Bacteria;p__Synergistetes;c__Synergistia;o__Synergistales":32.0,"k__Bacteria;p__TA06;c__;o__":5.0,"k__Bacteria;p__TM6;c__SJA-4;o__S1198":0.0,"k__Bacteria;p__TM7;c__TM7-1;o__":22.0,"k__Bacteria;p__TM7;c__TM7-3;__":25.0,"k__Bacteria;p__TM7;c__TM7-3;o__":28.0,"k__Bacteria;p__TM7;c__TM7-3;o__I025":0.0,"k__Bacteria;p__Tenericutes;c__Mollicutes;o__RF39":0.0,"k__Bacteria;p__Tenericutes;c__RF3;o__ML615J-28":0.0,"k__Bacteria;p__Thermotogae;c__Thermotogae;o__Thermotogales":29.0,"k__Bacteria;p__Verrucomicrobia;c__Verruco-5;o__LD1-PB3":32.0,"k__Bacteria;p__Verrucomicrobia;c__[Pedosphaerae];o__[Pedosphaerales]":0.0,"k__Bacteria;p__WS6;c__SC72;o__A-2AF":0.0,"k__Bacteria;p__WWE1;c__[Cloacamonae];o__[Cloacamonales]":753.0,"k__Bacteria;p__[Thermi];c__Deinococci;o__Deinococcales":0.0,"Process Day":"01","arsenite add.":"As0","plant no.":"#14","plant type":"SSD"},{"index":"U341F-U806R-P1-NW4-1-14-41","k__Archaea;p__Euryarchaeota;c__Methanobacteria;o__Methanobacteriales":51.0,"k__Archaea;p__Euryarchaeota;c__Methanomicrobia;o__Methanomicrobiales":142.0,"k__Archaea;p__Euryarchaeota;c__Methanomicrobia;o__Methanosarcinales":1355.0,"k__Archaea;p__Euryarchaeota;c__Thermoplasmata;o__E2":0.0,"k__Bacteria;__;__;__":40.0,"k__Bacteria;p__;c__;o__":10.0,"k__Bacteria;p__Acidobacteria;c__BPC102;o__B110":0.0,"k__Bacteria;p__Acidobacteria;c__BPC102;o__MVS-40":13.0,"k__Bacteria;p__Acidobacteria;c__Sva0725;o__Sva0725":54.0,"k__Bacteria;p__Acidobacteria;c__[Chloracidobacteria];o__RB41":6.0,"k__Bacteria;p__Actinobacteria;c__;o__":14.0,"k__Bacteria;p__Actinobacteria;c__Acidimicrobiia;o__Acidimicrobiales":170.0,"k__Bacteria;p__Actinobacteria;c__Actinobacteria;o__Actinomycetales":578.0,"k__Bacteria;p__Actinobacteria;c__Actinobacteria;o__WCHB1-81":36.0,"k__Bacteria;p__Actinobacteria;c__Thermoleophilia;o__Gaiellales":4.0,"k__Bacteria;p__Actinobacteria;c__Thermoleophilia;o__Solirubrobacterales":16.0,"k__Bacteria;p__Bacteroidetes;__;__":133.0,"k__Bacteria;p__Bacteroidetes;c__Bacteroidia;o__Bacteroidales":3457.0,"k__Bacteria;p__Bacteroidetes;c__Cytophagia;o__Cytophagales":0.0,"k__Bacteria;p__Bacteroidetes;c__Flavobacteriia;o__Flavobacteriales":30.0,"k__Bacteria;p__Bacteroidetes;c__Sphingobacteriia;o__Sphingobacteriales":0.0,"k__Bacteria;p__Bacteroidetes;c__[Saprospirae];o__[Saprospirales]":113.0,"k__Bacteria;p__Caldiserica;c__OP5;o__WCHB1-02":66.0,"k__Bacteria;p__Caldiserica;c__TTA-B1;o__":71.0,"k__Bacteria;p__Chlorobi;c__SJA-28;o__":33.0,"k__Bacteria;p__Chloroflexi;c__;o__":0.0,"k__Bacteria;p__Chloroflexi;c__Anaerolineae;o__":0.0,"k__Bacteria;p__Chloroflexi;c__Anaerolineae;o__Anaerolineales":546.0,"k__Bacteria;p__Chloroflexi;c__Anaerolineae;o__Caldilineales":50.0,"k__Bacteria;p__Chloroflexi;c__Anaerolineae;o__OPB11":19.0,"k__Bacteria;p__Chloroflexi;c__Anaerolineae;o__SHA-20":29.0,"k__Bacteria;p__Chloroflexi;c__Anaerolineae;o__WCHB1-50":0.0,"k__Bacteria;p__Chloroflexi;c__Ellin6529;o__":7.0,"k__Bacteria;p__Chloroflexi;c__SHA-26;o__":0.0,"k__Bacteria;p__Cyanobacteria;c__4C0d-2;o__MLE1-12":8.0,"k__Bacteria;p__Cyanobacteria;c__Chloroplast;o__Chlorophyta":0.0,"k__Bacteria;p__EM3;c__;o__":332.0,"k__Bacteria;p__Fibrobacteres;c__TG3;o__TG3-1":0.0,"k__Bacteria;p__Firmicutes;c__Bacilli;o__Bacillales":0.0,"k__Bacteria;p__Firmicutes;c__Bacilli;o__Lactobacillales":68.0,"k__Bacteria;p__Firmicutes;c__Bacilli;o__Turicibacterales":8.0,"k__Bacteria;p__Firmicutes;c__Clostridia;__":0.0,"k__Bacteria;p__Firmicutes;c__Clostridia;o__":0.0,"k__Bacteria;p__Firmicutes;c__Clostridia;o__BSA2B-08":0.0,"k__Bacteria;p__Firmicutes;c__Clostridia;o__Clostridiales":1838.0,"k__Bacteria;p__Firmicutes;c__Clostridia;o__Halanaerobiales":0.0,"k__Bacteria;p__Firmicutes;c__Clostridia;o__MBA08":22.0,"k__Bacteria;p__Firmicutes;c__Clostridia;o__Natranaerobiales":0.0,"k__Bacteria;p__Firmicutes;c__Clostridia;o__OPB54":16.0,"k__Bacteria;p__Firmicutes;c__Clostridia;o__SHA-98":350.0,"k__Bacteria;p__Firmicutes;c__Clostridia;o__Thermoanaerobacterales":0.0,"k__Bacteria;p__Firmicutes;c__Erysipelotrichi;o__Erysipelotrichales":0.0,"k__Bacteria;p__Firmicutes;c__OPB54;o__":0.0,"k__Bacteria;p__NKB19;__;__":0.0,"k__Bacteria;p__NKB19;c__TSBW08;o__":0.0,"k__Bacteria;p__OD1;c__;o__":105.0,"k__Bacteria;p__OD1;c__ABY1;o__":12.0,"k__Bacteria;p__OP1;c__OPB14;o__":5.0,"k__Bacteria;p__OP8;c__OP8_1;__":107.0,"k__Bacteria;p__OP8;c__OP8_1;o__":0.0,"k__Bacteria;p__OP9;c__JS1;o__BA021":9.0,"k__Bacteria;p__OP9;c__OPB46;o__OPB72":23.0,"k__Bacteria;p__OP9;c__OPB46;o__SHA-1":47.0,"k__Bacteria;p__Proteobacteria;__;__":0.0,"k__Bacteria;p__Proteobacteria;c__Alphaproteobacteria;o__Caulobacterales":0.0,"k__Bacteria;p__Proteobacteria;c__Alphaproteobacteria;o__Rhizobiales":15.0,"k__Bacteria;p__Proteobacteria;c__Alphaproteobacteria;o__Rhodobacterales":67.0,"k__Bacteria;p__Proteobacteria;c__Alphaproteobacteria;o__Rhodospirillales":9.0,"k__Bacteria;p__Proteobacteria;c__Alphaproteobacteria;o__Sphingomonadales":48.0,"k__Bacteria;p__Proteobacteria;c__Betaproteobacteria;__":12.0,"k__Bacteria;p__Proteobacteria;c__Betaproteobacteria;o__Burkholderiales":113.0,"k__Bacteria;p__Proteobacteria;c__Betaproteobacteria;o__Rhodocyclales":19.0,"k__Bacteria;p__Proteobacteria;c__Betaproteobacteria;o__SC-I-84":12.0,"k__Bacteria;p__Proteobacteria;c__Deltaproteobacteria;o__GW-28":27.0,"k__Bacteria;p__Proteobacteria;c__Deltaproteobacteria;o__Myxococcales":9.0,"k__Bacteria;p__Proteobacteria;c__Deltaproteobacteria;o__Syntrophobacterales":76.0,"k__Bacteria;p__Proteobacteria;c__Epsilonproteobacteria;o__Campylobacterales":18.0,"k__Bacteria;p__Proteobacteria;c__Gammaproteobacteria;o__Enterobacteriales":15.0,"k__Bacteria;p__Proteobacteria;c__Gammaproteobacteria;o__Pseudomonadales":32.0,"k__Bacteria;p__Proteobacteria;c__Gammaproteobacteria;o__Xanthomonadales":13.0,"k__Bacteria;p__SAR406;c__AB16;o__noFP_H7":22.0,"k__Bacteria;p__SR1;c__;o__":11.0,"k__Bacteria;p__Spirochaetes;c__Spirochaetes;o__M2PT2-76":20.0,"k__Bacteria;p__Spirochaetes;c__Spirochaetes;o__Spirochaetales":802.0,"k__Bacteria;p__Spirochaetes;c__[Brachyspirae];o__[Brachyspirales]":5.0,"k__Bacteria;p__Spirochaetes;c__[Leptospirae];o__[Leptospirales]":28.0,"k__Bacteria;p__Synergistetes;c__Synergistia;o__Synergistales":71.0,"k__Bacteria;p__TA06;c__;o__":0.0,"k__Bacteria;p__TM6;c__SJA-4;o__S1198":0.0,"k__Bacteria;p__TM7;c__TM7-1;o__":78.0,"k__Bacteria;p__TM7;c__TM7-3;__":35.0,"k__Bacteria;p__TM7;c__TM7-3;o__":86.0,"k__Bacteria;p__TM7;c__TM7-3;o__I025":12.0,"k__Bacteria;p__Tenericutes;c__Mollicutes;o__RF39":0.0,"k__Bacteria;p__Tenericutes;c__RF3;o__ML615J-28":0.0,"k__Bacteria;p__Thermotogae;c__Thermotogae;o__Thermotogales":35.0,"k__Bacteria;p__Verrucomicrobia;c__Verruco-5;o__LD1-PB3":31.0,"k__Bacteria;p__Verrucomicrobia;c__[Pedosphaerae];o__[Pedosphaerales]":13.0,"k__Bacteria;p__WS6;c__SC72;o__A-2AF":3.0,"k__Bacteria;p__WWE1;c__[Cloacamonae];o__[Cloacamonales]":1396.0,"k__Bacteria;p__[Thermi];c__Deinococci;o__Deinococcales":0.0,"Process Day":"01","arsenite add.":"As0","plant no.":"#14","plant type":"SSD"},{"index":"U341F-U806R-P1-NW4-1-27-100","k__Archaea;p__Euryarchaeota;c__Methanobacteria;o__Methanobacteriales":17.0,"k__Archaea;p__Euryarchaeota;c__Methanomicrobia;o__Methanomicrobiales":182.0,"k__Archaea;p__Euryarchaeota;c__Methanomicrobia;o__Methanosarcinales":728.0,"k__Archaea;p__Euryarchaeota;c__Thermoplasmata;o__E2":15.0,"k__Bacteria;__;__;__":58.0,"k__Bacteria;p__;c__;o__":19.0,"k__Bacteria;p__Acidobacteria;c__BPC102;o__B110":7.0,"k__Bacteria;p__Acidobacteria;c__BPC102;o__MVS-40":6.0,"k__Bacteria;p__Acidobacteria;c__Sva0725;o__Sva0725":35.0,"k__Bacteria;p__Acidobacteria;c__[Chloracidobacteria];o__RB41":0.0,"k__Bacteria;p__Actinobacteria;c__;o__":54.0,"k__Bacteria;p__Actinobacteria;c__Acidimicrobiia;o__Acidimicrobiales":47.0,"k__Bacteria;p__Actinobacteria;c__Actinobacteria;o__Actinomycetales":334.0,"k__Bacteria;p__Actinobacteria;c__Actinobacteria;o__WCHB1-81":36.0,"k__Bacteria;p__Actinobacteria;c__Thermoleophilia;o__Gaiellales":0.0,"k__Bacteria;p__Actinobacteria;c__Thermoleophilia;o__Solirubrobacterales":23.0,"k__Bacteria;p__Bacteroidetes;__;__":115.0,"k__Bacteria;p__Bacteroidetes;c__Bacteroidia;o__Bacteroidales":5956.0,"k__Bacteria;p__Bacteroidetes;c__Cytophagia;o__Cytophagales":0.0,"k__Bacteria;p__Bacteroidetes;c__Flavobacteriia;o__Flavobacteriales":6.0,"k__Bacteria;p__Bacteroidetes;c__Sphingobacteriia;o__Sphingobacteriales":0.0,"k__Bacteria;p__Bacteroidetes;c__[Saprospirae];o__[Saprospirales]":0.0,"k__Bacteria;p__Caldiserica;c__OP5;o__WCHB1-02":136.0,"k__Bacteria;p__Caldiserica;c__TTA-B1;o__":187.0,"k__Bacteria;p__Chlorobi;c__SJA-28;o__":0.0,"k__Bacteria;p__Chloroflexi;c__;o__":0.0,"k__Bacteria;p__Chloroflexi;c__Anaerolineae;o__":0.0,"k__Bacteria;p__Chloroflexi;c__Anaerolineae;o__Anaerolineales":1194.0,"k__Bacteria;p__Chloroflexi;c__Anaerolineae;o__Caldilineales":0.0,"k__Bacteria;p__Chloroflexi;c__Anaerolineae;o__OPB11":20.0,"k__Bacteria;p__Chloroflexi;c__Anaerolineae;o__SHA-20":17.0,"k__Bacteria;p__Chloroflexi;c__Anaerolineae;o__WCHB1-50":0.0,"k__Bacteria;p__Chloroflexi;c__Ellin6529;o__":0.0,"k__Bacteria;p__Chloroflexi;c__SHA-26;o__":0.0,"k__Bacteria;p__Cyanobacteria;c__4C0d-2;o__MLE1-12":0.0,"k__Bacteria;p__Cyanobacteria;c__Chloroplast;o__Chlorophyta":0.0,"k__Bacteria;p__EM3;c__;o__":754.0,"k__Bacteria;p__Fibrobacteres;c__TG3;o__TG3-1":0.0,"k__Bacteria;p__Firmicutes;c__Bacilli;o__Bacillales":0.0,"k__Bacteria;p__Firmicutes;c__Bacilli;o__Lactobacillales":0.0,"k__Bacteria;p__Firmicutes;c__Bacilli;o__Turicibacterales":13.0,"k__Bacteria;p__Firmicutes;c__Clostridia;__":0.0,"k__Bacteria;p__Firmicutes;c__Clostridia;o__":4.0,"k__Bacteria;p__Firmicutes;c__Clostridia;o__BSA2B-08":0.0,"k__Bacteria;p__Firmicutes;c__Clostridia;o__Clostridiales":802.0,"k__Bacteria;p__Firmicutes;c__Clostridia;o__Halanaerobiales":0.0,"k__Bacteria;p__Firmicutes;c__Clostridia;o__MBA08":0.0,"k__Bacteria;p__Firmicutes;c__Clostridia;o__Natranaerobiales":0.0,"k__Bacteria;p__Firmicutes;c__Clostridia;o__OPB54":14.0,"k__Bacteria;p__Firmicutes;c__Clostridia;o__SHA-98":467.0,"k__Bacteria;p__Firmicutes;c__Clostridia;o__Thermoanaerobacterales":0.0,"k__Bacteria;p__Firmicutes;c__Erysipelotrichi;o__Erysipelotrichales":0.0,"k__Bacteria;p__Firmicutes;c__OPB54;o__":0.0,"k__Bacteria;p__NKB19;__;__":0.0,"k__Bacteria;p__NKB19;c__TSBW08;o__":0.0,"k__Bacteria;p__OD1;c__;o__":324.0,"k__Bacteria;p__OD1;c__ABY1;o__":0.0,"k__Bacteria;p__OP1;c__OPB14;o__":13.0,"k__Bacteria;p__OP8;c__OP8_1;__":103.0,"k__Bacteria;p__OP8;c__OP8_1;o__":60.0,"k__Bacteria;p__OP9;c__JS1;o__BA021":26.0,"k__Bacteria;p__OP9;c__OPB46;o__OPB72":34.0,"k__Bacteria;p__OP9;c__OPB46;o__SHA-1":42.0,"k__Bacteria;p__Proteobacteria;__;__":0.0,"k__Bacteria;p__Proteobacteria;c__Alphaproteobacteria;o__Caulobacterales":0.0,"k__Bacteria;p__Proteobacteria;c__Alphaproteobacteria;o__Rhizobiales":37.0,"k__Bacteria;p__Proteobacteria;c__Alphaproteobacteria;o__Rhodobacterales":0.0,"k__Bacteria;p__Proteobacteria;c__Alphaproteobacteria;o__Rhodospirillales":0.0,"k__Bacteria;p__Proteobacteria;c__Alphaproteobacteria;o__Sphingomonadales":0.0,"k__Bacteria;p__Proteobacteria;c__Betaproteobacteria;__":0.0,"k__Bacteria;p__Proteobacteria;c__Betaproteobacteria;o__Burkholderiales":36.0,"k__Bacteria;p__Proteobacteria;c__Betaproteobacteria;o__Rhodocyclales":0.0,"k__Bacteria;p__Proteobacteria;c__Betaproteobacteria;o__SC-I-84":25.0,"k__Bacteria;p__Proteobacteria;c__Deltaproteobacteria;o__GW-28":23.0,"k__Bacteria;p__Proteobacteria;c__Deltaproteobacteria;o__Myxococcales":0.0,"k__Bacteria;p__Proteobacteria;c__Deltaproteobacteria;o__Syntrophobacterales":26.0,"k__Bacteria;p__Proteobacteria;c__Epsilonproteobacteria;o__Campylobacterales":0.0,"k__Bacteria;p__Proteobacteria;c__Gammaproteobacteria;o__Enterobacteriales":0.0,"k__Bacteria;p__Proteobacteria;c__Gammaproteobacteria;o__Pseudomonadales":0.0,"k__Bacteria;p__Proteobacteria;c__Gammaproteobacteria;o__Xanthomonadales":0.0,"k__Bacteria;p__SAR406;c__AB16;o__noFP_H7":37.0,"k__Bacteria;p__SR1;c__;o__":0.0,"k__Bacteria;p__Spirochaetes;c__Spirochaetes;o__M2PT2-76":0.0,"k__Bacteria;p__Spirochaetes;c__Spirochaetes;o__Spirochaetales":1970.0,"k__Bacteria;p__Spirochaetes;c__[Brachyspirae];o__[Brachyspirales]":0.0,"k__Bacteria;p__Spirochaetes;c__[Leptospirae];o__[Leptospirales]":0.0,"k__Bacteria;p__Synergistetes;c__Synergistia;o__Synergistales":93.0,"k__Bacteria;p__TA06;c__;o__":39.0,"k__Bacteria;p__TM6;c__SJA-4;o__S1198":0.0,"k__Bacteria;p__TM7;c__TM7-1;o__":28.0,"k__Bacteria;p__TM7;c__TM7-3;__":0.0,"k__Bacteria;p__TM7;c__TM7-3;o__":24.0,"k__Bacteria;p__TM7;c__TM7-3;o__I025":0.0,"k__Bacteria;p__Tenericutes;c__Mollicutes;o__RF39":0.0,"k__Bacteria;p__Tenericutes;c__RF3;o__ML615J-28":0.0,"k__Bacteria;p__Thermotogae;c__Thermotogae;o__Thermotogales":86.0,"k__Bacteria;p__Verrucomicrobia;c__Verruco-5;o__LD1-PB3":0.0,"k__Bacteria;p__Verrucomicrobia;c__[Pedosphaerae];o__[Pedosphaerales]":0.0,"k__Bacteria;p__WS6;c__SC72;o__A-2AF":0.0,"k__Bacteria;p__WWE1;c__[Cloacamonae];o__[Cloacamonales]":3363.0,"k__Bacteria;p__[Thermi];c__Deinococci;o__Deinococcales":0.0,"Process Day":"15","arsenite add.":"As0","plant no.":"#14","plant type":"SSD"},{"index":"U341F-U806R-P1-NW4-1-29-104","k__Archaea;p__Euryarchaeota;c__Methanobacteria;o__Methanobacteriales":0.0,"k__Archaea;p__Euryarchaeota;c__Methanomicrobia;o__Methanomicrobiales":130.0,"k__Archaea;p__Euryarchaeota;c__Methanomicrobia;o__Methanosarcinales":150.0,"k__Archaea;p__Euryarchaeota;c__Thermoplasmata;o__E2":10.0,"k__Bacteria;__;__;__":171.0,"k__Bacteria;p__;c__;o__":51.0,"k__Bacteria;p__Acidobacteria;c__BPC102;o__B110":0.0,"k__Bacteria;p__Acidobacteria;c__BPC102;o__MVS-40":6.0,"k__Bacteria;p__Acidobacteria;c__Sva0725;o__Sva0725":134.0,"k__Bacteria;p__Acidobacteria;c__[Chloracidobacteria];o__RB41":0.0,"k__Bacteria;p__Actinobacteria;c__;o__":93.0,"k__Bacteria;p__Actinobacteria;c__Acidimicrobiia;o__Acidimicrobiales":72.0,"k__Bacteria;p__Actinobacteria;c__Actinobacteria;o__Actinomycetales":599.0,"k__Bacteria;p__Actinobacteria;c__Actinobacteria;o__WCHB1-81":24.0,"k__Bacteria;p__Actinobacteria;c__Thermoleophilia;o__Gaiellales":17.0,"k__Bacteria;p__Actinobacteria;c__Thermoleophilia;o__Solirubrobacterales":46.0,"k__Bacteria;p__Bacteroidetes;__;__":321.0,"k__Bacteria;p__Bacteroidetes;c__Bacteroidia;o__Bacteroidales":5467.0,"k__Bacteria;p__Bacteroidetes;c__Cytophagia;o__Cytophagales":0.0,"k__Bacteria;p__Bacteroidetes;c__Flavobacteriia;o__Flavobacteriales":15.0,"k__Bacteria;p__Bacteroidetes;c__Sphingobacteriia;o__Sphingobacteriales":0.0,"k__Bacteria;p__Bacteroidetes;c__[Saprospirae];o__[Saprospirales]":3.0,"k__Bacteria;p__Caldiserica;c__OP5;o__WCHB1-02":134.0,"k__Bacteria;p__Caldiserica;c__TTA-B1;o__":320.0,"k__Bacteria;p__Chlorobi;c__SJA-28;o__":0.0,"k__Bacteria;p__Chloroflexi;c__;o__":0.0,"k__Bacteria;p__Chloroflexi;c__Anaerolineae;o__":0.0,"k__Bacteria;p__Chloroflexi;c__Anaerolineae;o__Anaerolineales":679.0,"k__Bacteria;p__Chloroflexi;c__Anaerolineae;o__Caldilineales":30.0,"k__Bacteria;p__Chloroflexi;c__Anaerolineae;o__OPB11":32.0,"k__Bacteria;p__Chloroflexi;c__Anaerolineae;o__SHA-20":39.0,"k__Bacteria;p__Chloroflexi;c__Anaerolineae;o__WCHB1-50":3.0,"k__Bacteria;p__Chloroflexi;c__Ellin6529;o__":0.0,"k__Bacteria;p__Chloroflexi;c__SHA-26;o__":5.0,"k__Bacteria;p__Cyanobacteria;c__4C0d-2;o__MLE1-12":0.0,"k__Bacteria;p__Cyanobacteria;c__Chloroplast;o__Chlorophyta":4.0,"k__Bacteria;p__EM3;c__;o__":343.0,"k__Bacteria;p__Fibrobacteres;c__TG3;o__TG3-1":0.0,"k__Bacteria;p__Firmicutes;c__Bacilli;o__Bacillales":0.0,"k__Bacteria;p__Firmicutes;c__Bacilli;o__Lactobacillales":0.0,"k__Bacteria;p__Firmicutes;c__Bacilli;o__Turicibacterales":44.0,"k__Bacteria;p__Firmicutes;c__Clostridia;__":0.0,"k__Bacteria;p__Firmicutes;c__Clostridia;o__":0.0,"k__Bacteria;p__Firmicutes;c__Clostridia;o__BSA2B-08":0.0,"k__Bacteria;p__Firmicutes;c__Clostridia;o__Clostridiales":3006.0,"k__Bacteria;p__Firmicutes;c__Clostridia;o__Halanaerobiales":0.0,"k__Bacteria;p__Firmicutes;c__Clostridia;o__MBA08":0.0,"k__Bacteria;p__Firmicutes;c__Clostridia;o__Natranaerobiales":0.0,"k__Bacteria;p__Firmicutes;c__Clostridia;o__OPB54":15.0,"k__Bacteria;p__Firmicutes;c__Clostridia;o__SHA-98":798.0,"k__Bacteria;p__Firmicutes;c__Clostridia;o__Thermoanaerobacterales":14.0,"k__Bacteria;p__Firmicutes;c__Erysipelotrichi;o__Erysipelotrichales":0.0,"k__Bacteria;p__Firmicutes;c__OPB54;o__":0.0,"k__Bacteria;p__NKB19;__;__":8.0,"k__Bacteria;p__NKB19;c__TSBW08;o__":14.0,"k__Bacteria;p__OD1;c__;o__":624.0,"k__Bacteria;p__OD1;c__ABY1;o__":20.0,"k__Bacteria;p__OP1;c__OPB14;o__":48.0,"k__Bacteria;p__OP8;c__OP8_1;__":115.0,"k__Bacteria;p__OP8;c__OP8_1;o__":90.0,"k__Bacteria;p__OP9;c__JS1;o__BA021":43.0,"k__Bacteria;p__OP9;c__OPB46;o__OPB72":73.0,"k__Bacteria;p__OP9;c__OPB46;o__SHA-1":56.0,"k__Bacteria;p__Proteobacteria;__;__":4.0,"k__Bacteria;p__Proteobacteria;c__Alphaproteobacteria;o__Caulobacterales":4.0,"k__Bacteria;p__Proteobacteria;c__Alphaproteobacteria;o__Rhizobiales":10.0,"k__Bacteria;p__Proteobacteria;c__Alphaproteobacteria;o__Rhodobacterales":31.0,"k__Bacteria;p__Proteobacteria;c__Alphaproteobacteria;o__Rhodospirillales":0.0,"k__Bacteria;p__Proteobacteria;c__Alphaproteobacteria;o__Sphingomonadales":0.0,"k__Bacteria;p__Proteobacteria;c__Betaproteobacteria;__":15.0,"k__Bacteria;p__Proteobacteria;c__Betaproteobacteria;o__Burkholderiales":186.0,"k__Bacteria;p__Proteobacteria;c__Betaproteobacteria;o__Rhodocyclales":17.0,"k__Bacteria;p__Proteobacteria;c__Betaproteobacteria;o__SC-I-84":10.0,"k__Bacteria;p__Proteobacteria;c__Deltaproteobacteria;o__GW-28":28.0,"k__Bacteria;p__Proteobacteria;c__Deltaproteobacteria;o__Myxococcales":0.0,"k__Bacteria;p__Proteobacteria;c__Deltaproteobacteria;o__Syntrophobacterales":86.0,"k__Bacteria;p__Proteobacteria;c__Epsilonproteobacteria;o__Campylobacterales":0.0,"k__Bacteria;p__Proteobacteria;c__Gammaproteobacteria;o__Enterobacteriales":0.0,"k__Bacteria;p__Proteobacteria;c__Gammaproteobacteria;o__Pseudomonadales":28.0,"k__Bacteria;p__Proteobacteria;c__Gammaproteobacteria;o__Xanthomonadales":12.0,"k__Bacteria;p__SAR406;c__AB16;o__noFP_H7":138.0,"k__Bacteria;p__SR1;c__;o__":0.0,"k__Bacteria;p__Spirochaetes;c__Spirochaetes;o__M2PT2-76":0.0,"k__Bacteria;p__Spirochaetes;c__Spirochaetes;o__Spirochaetales":1736.0,"k__Bacteria;p__Spirochaetes;c__[Brachyspirae];o__[Brachyspirales]":7.0,"k__Bacteria;p__Spirochaetes;c__[Leptospirae];o__[Leptospirales]":6.0,"k__Bacteria;p__Synergistetes;c__Synergistia;o__Synergistales":175.0,"k__Bacteria;p__TA06;c__;o__":58.0,"k__Bacteria;p__TM6;c__SJA-4;o__S1198":3.0,"k__Bacteria;p__TM7;c__TM7-1;o__":47.0,"k__Bacteria;p__TM7;c__TM7-3;__":0.0,"k__Bacteria;p__TM7;c__TM7-3;o__":32.0,"k__Bacteria;p__TM7;c__TM7-3;o__I025":4.0,"k__Bacteria;p__Tenericutes;c__Mollicutes;o__RF39":0.0,"k__Bacteria;p__Tenericutes;c__RF3;o__ML615J-28":0.0,"k__Bacteria;p__Thermotogae;c__Thermotogae;o__Thermotogales":172.0,"k__Bacteria;p__Verrucomicrobia;c__Verruco-5;o__LD1-PB3":0.0,"k__Bacteria;p__Verrucomicrobia;c__[Pedosphaerae];o__[Pedosphaerales]":0.0,"k__Bacteria;p__WS6;c__SC72;o__A-2AF":0.0,"k__Bacteria;p__WWE1;c__[Cloacamonae];o__[Cloacamonales]":3528.0,"k__Bacteria;p__[Thermi];c__Deinococci;o__Deinococcales":0.0,"Process Day":"15","arsenite add.":"As30","plant no.":"#14","plant type":"SSD"},{"index":"U341F-U806R-P1-NW4-1-31-108","k__Archaea;p__Euryarchaeota;c__Methanobacteria;o__Methanobacteriales":0.0,"k__Archaea;p__Euryarchaeota;c__Methanomicrobia;o__Methanomicrobiales":185.0,"k__Archaea;p__Euryarchaeota;c__Methanomicrobia;o__Methanosarcinales":72.0,"k__Archaea;p__Euryarchaeota;c__Thermoplasmata;o__E2":0.0,"k__Bacteria;__;__;__":22.0,"k__Bacteria;p__;c__;o__":0.0,"k__Bacteria;p__Acidobacteria;c__BPC102;o__B110":0.0,"k__Bacteria;p__Acidobacteria;c__BPC102;o__MVS-40":0.0,"k__Bacteria;p__Acidobacteria;c__Sva0725;o__Sva0725":16.0,"k__Bacteria;p__Acidobacteria;c__[Chloracidobacteria];o__RB41":0.0,"k__Bacteria;p__Actinobacteria;c__;o__":15.0,"k__Bacteria;p__Actinobacteria;c__Acidimicrobiia;o__Acidimicrobiales":38.0,"k__Bacteria;p__Actinobacteria;c__Actinobacteria;o__Actinomycetales":244.0,"k__Bacteria;p__Actinobacteria;c__Actinobacteria;o__WCHB1-81":10.0,"k__Bacteria;p__Actinobacteria;c__Thermoleophilia;o__Gaiellales":9.0,"k__Bacteria;p__Actinobacteria;c__Thermoleophilia;o__Solirubrobacterales":18.0,"k__Bacteria;p__Bacteroidetes;__;__":80.0,"k__Bacteria;p__Bacteroidetes;c__Bacteroidia;o__Bacteroidales":3601.0,"k__Bacteria;p__Bacteroidetes;c__Cytophagia;o__Cytophagales":0.0,"k__Bacteria;p__Bacteroidetes;c__Flavobacteriia;o__Flavobacteriales":6.0,"k__Bacteria;p__Bacteroidetes;c__Sphingobacteriia;o__Sphingobacteriales":0.0,"k__Bacteria;p__Bacteroidetes;c__[Saprospirae];o__[Saprospirales]":0.0,"k__Bacteria;p__Caldiserica;c__OP5;o__WCHB1-02":56.0,"k__Bacteria;p__Caldiserica;c__TTA-B1;o__":63.0,"k__Bacteria;p__Chlorobi;c__SJA-28;o__":0.0,"k__Bacteria;p__Chloroflexi;c__;o__":0.0,"k__Bacteria;p__Chloroflexi;c__Anaerolineae;o__":0.0,"k__Bacteria;p__Chloroflexi;c__Anaerolineae;o__Anaerolineales":708.0,"k__Bacteria;p__Chloroflexi;c__Anaerolineae;o__Caldilineales":0.0,"k__Bacteria;p__Chloroflexi;c__Anaerolineae;o__OPB11":9.0,"k__Bacteria;p__Chloroflexi;c__Anaerolineae;o__SHA-20":0.0,"k__Bacteria;p__Chloroflexi;c__Anaerolineae;o__WCHB1-50":0.0,"k__Bacteria;p__Chloroflexi;c__Ellin6529;o__":0.0,"k__Bacteria;p__Chloroflexi;c__SHA-26;o__":0.0,"k__Bacteria;p__Cyanobacteria;c__4C0d-2;o__MLE1-12":0.0,"k__Bacteria;p__Cyanobacteria;c__Chloroplast;o__Chlorophyta":0.0,"k__Bacteria;p__EM3;c__;o__":588.0,"k__Bacteria;p__Fibrobacteres;c__TG3;o__TG3-1":0.0,"k__Bacteria;p__Firmicutes;c__Bacilli;o__Bacillales":0.0,"k__Bacteria;p__Firmicutes;c__Bacilli;o__Lactobacillales":0.0,"k__Bacteria;p__Firmicutes;c__Bacilli;o__Turicibacterales":0.0,"k__Bacteria;p__Firmicutes;c__Clostridia;__":0.0,"k__Bacteria;p__Firmicutes;c__Clostridia;o__":0.0,"k__Bacteria;p__Firmicutes;c__Clostridia;o__BSA2B-08":0.0,"k__Bacteria;p__Firmicutes;c__Clostridia;o__Clostridiales":594.0,"k__Bacteria;p__Firmicutes;c__Clostridia;o__Halanaerobiales":0.0,"k__Bacteria;p__Firmicutes;c__Clostridia;o__MBA08":0.0,"k__Bacteria;p__Firmicutes;c__Clostridia;o__Natranaerobiales":0.0,"k__Bacteria;p__Firmicutes;c__Clostridia;o__OPB54":9.0,"k__Bacteria;p__Firmicutes;c__Clostridia;o__SHA-98":353.0,"k__Bacteria;p__Firmicutes;c__Clostridia;o__Thermoanaerobacterales":0.0,"k__Bacteria;p__Firmicutes;c__Erysipelotrichi;o__Erysipelotrichales":0.0,"k__Bacteria;p__Firmicutes;c__OPB54;o__":0.0,"k__Bacteria;p__NKB19;__;__":0.0,"k__Bacteria;p__NKB19;c__TSBW08;o__":0.0,"k__Bacteria;p__OD1;c__;o__":93.0,"k__Bacteria;p__OD1;c__ABY1;o__":0.0,"k__Bacteria;p__OP1;c__OPB14;o__":6.0,"k__Bacteria;p__OP8;c__OP8_1;__":96.0,"k__Bacteria;p__OP8;c__OP8_1;o__":0.0,"k__Bacteria;p__OP9;c__JS1;o__BA021":8.0,"k__Bacteria;p__OP9;c__OPB46;o__OPB72":19.0,"k__Bacteria;p__OP9;c__OPB46;o__SHA-1":25.0,"k__Bacteria;p__Proteobacteria;__;__":0.0,"k__Bacteria;p__Proteobacteria;c__Alphaproteobacteria;o__Caulobacterales":0.0,"k__Bacteria;p__Proteobacteria;c__Alphaproteobacteria;o__Rhizobiales":10.0,"k__Bacteria;p__Proteobacteria;c__Alphaproteobacteria;o__Rhodobacterales":0.0,"k__Bacteria;p__Proteobacteria;c__Alphaproteobacteria;o__Rhodospirillales":0.0,"k__Bacteria;p__Proteobacteria;c__Alphaproteobacteria;o__Sphingomonadales":0.0,"k__Bacteria;p__Proteobacteria;c__Betaproteobacteria;__":0.0,"k__Bacteria;p__Proteobacteria;c__Betaproteobacteria;o__Burkholderiales":43.0,"k__Bacteria;p__Proteobacteria;c__Betaproteobacteria;o__Rhodocyclales":0.0,"k__Bacteria;p__Proteobacteria;c__Betaproteobacteria;o__SC-I-84":0.0,"k__Bacteria;p__Proteobacteria;c__Deltaproteobacteria;o__GW-28":29.0,"k__Bacteria;p__Proteobacteria;c__Deltaproteobacteria;o__Myxococcales":0.0,"k__Bacteria;p__Proteobacteria;c__Deltaproteobacteria;o__Syntrophobacterales":7.0,"k__Bacteria;p__Proteobacteria;c__Epsilonproteobacteria;o__Campylobacterales":0.0,"k__Bacteria;p__Proteobacteria;c__Gammaproteobacteria;o__Enterobacteriales":0.0,"k__Bacteria;p__Proteobacteria;c__Gammaproteobacteria;o__Pseudomonadales":0.0,"k__Bacteria;p__Proteobacteria;c__Gammaproteobacteria;o__Xanthomonadales":29.0,"k__Bacteria;p__SAR406;c__AB16;o__noFP_H7":13.0,"k__Bacteria;p__SR1;c__;o__":0.0,"k__Bacteria;p__Spirochaetes;c__Spirochaetes;o__M2PT2-76":0.0,"k__Bacteria;p__Spirochaetes;c__Spirochaetes;o__Spirochaetales":982.0,"k__Bacteria;p__Spirochaetes;c__[Brachyspirae];o__[Brachyspirales]":0.0,"k__Bacteria;p__Spirochaetes;c__[Leptospirae];o__[Leptospirales]":0.0,"k__Bacteria;p__Synergistetes;c__Synergistia;o__Synergistales":29.0,"k__Bacteria;p__TA06;c__;o__":5.0,"k__Bacteria;p__TM6;c__SJA-4;o__S1198":0.0,"k__Bacteria;p__TM7;c__TM7-1;o__":40.0,"k__Bacteria;p__TM7;c__TM7-3;__":0.0,"k__Bacteria;p__TM7;c__TM7-3;o__":18.0,"k__Bacteria;p__TM7;c__TM7-3;o__I025":0.0,"k__Bacteria;p__Tenericutes;c__Mollicutes;o__RF39":0.0,"k__Bacteria;p__Tenericutes;c__RF3;o__ML615J-28":0.0,"k__Bacteria;p__Thermotogae;c__Thermotogae;o__Thermotogales":41.0,"k__Bacteria;p__Verrucomicrobia;c__Verruco-5;o__LD1-PB3":0.0,"k__Bacteria;p__Verrucomicrobia;c__[Pedosphaerae];o__[Pedosphaerales]":0.0,"k__Bacteria;p__WS6;c__SC72;o__A-2AF":0.0,"k__Bacteria;p__WWE1;c__[Cloacamonae];o__[Cloacamonales]":1544.0,"k__Bacteria;p__[Thermi];c__Deinococci;o__Deinococcales":0.0,"Process Day":"15","arsenite add.":"As60","plant no.":"#14","plant type":"SSD"},{"index":"U341F-U806R-P1-NW4-1-31-109","k__Archaea;p__Euryarchaeota;c__Methanobacteria;o__Methanobacteriales":0.0,"k__Archaea;p__Euryarchaeota;c__Methanomicrobia;o__Methanomicrobiales":97.0,"k__Archaea;p__Euryarchaeota;c__Methanomicrobia;o__Methanosarcinales":129.0,"k__Archaea;p__Euryarchaeota;c__Thermoplasmata;o__E2":0.0,"k__Bacteria;__;__;__":18.0,"k__Bacteria;p__;c__;o__":13.0,"k__Bacteria;p__Acidobacteria;c__BPC102;o__B110":0.0,"k__Bacteria;p__Acidobacteria;c__BPC102;o__MVS-40":0.0,"k__Bacteria;p__Acidobacteria;c__Sva0725;o__Sva0725":18.0,"k__Bacteria;p__Acidobacteria;c__[Chloracidobacteria];o__RB41":0.0,"k__Bacteria;p__Actinobacteria;c__;o__":14.0,"k__Bacteria;p__Actinobacteria;c__Acidimicrobiia;o__Acidimicrobiales":37.0,"k__Bacteria;p__Actinobacteria;c__Actinobacteria;o__Actinomycetales":195.0,"k__Bacteria;p__Actinobacteria;c__Actinobacteria;o__WCHB1-81":18.0,"k__Bacteria;p__Actinobacteria;c__Thermoleophilia;o__Gaiellales":9.0,"k__Bacteria;p__Actinobacteria;c__Thermoleophilia;o__Solirubrobacterales":17.0,"k__Bacteria;p__Bacteroidetes;__;__":58.0,"k__Bacteria;p__Bacteroidetes;c__Bacteroidia;o__Bacteroidales":3316.0,"k__Bacteria;p__Bacteroidetes;c__Cytophagia;o__Cytophagales":0.0,"k__Bacteria;p__Bacteroidetes;c__Flavobacteriia;o__Flavobacteriales":0.0,"k__Bacteria;p__Bacteroidetes;c__Sphingobacteriia;o__Sphingobacteriales":0.0,"k__Bacteria;p__Bacteroidetes;c__[Saprospirae];o__[Saprospirales]":0.0,"k__Bacteria;p__Caldiserica;c__OP5;o__WCHB1-02":66.0,"k__Bacteria;p__Caldiserica;c__TTA-B1;o__":147.0,"k__Bacteria;p__Chlorobi;c__SJA-28;o__":0.0,"k__Bacteria;p__Chloroflexi;c__;o__":0.0,"k__Bacteria;p__Chloroflexi;c__Anaerolineae;o__":6.0,"k__Bacteria;p__Chloroflexi;c__Anaerolineae;o__Anaerolineales":1060.0,"k__Bacteria;p__Chloroflexi;c__Anaerolineae;o__Caldilineales":14.0,"k__Bacteria;p__Chloroflexi;c__Anaerolineae;o__OPB11":0.0,"k__Bacteria;p__Chloroflexi;c__Anaerolineae;o__SHA-20":0.0,"k__Bacteria;p__Chloroflexi;c__Anaerolineae;o__WCHB1-50":0.0,"k__Bacteria;p__Chloroflexi;c__Ellin6529;o__":0.0,"k__Bacteria;p__Chloroflexi;c__SHA-26;o__":0.0,"k__Bacteria;p__Cyanobacteria;c__4C0d-2;o__MLE1-12":0.0,"k__Bacteria;p__Cyanobacteria;c__Chloroplast;o__Chlorophyta":0.0,"k__Bacteria;p__EM3;c__;o__":698.0,"k__Bacteria;p__Fibrobacteres;c__TG3;o__TG3-1":0.0,"k__Bacteria;p__Firmicutes;c__Bacilli;o__Bacillales":0.0,"k__Bacteria;p__Firmicutes;c__Bacilli;o__Lactobacillales":0.0,"k__Bacteria;p__Firmicutes;c__Bacilli;o__Turicibacterales":0.0,"k__Bacteria;p__Firmicutes;c__Clostridia;__":2.0,"k__Bacteria;p__Firmicutes;c__Clostridia;o__":0.0,"k__Bacteria;p__Firmicutes;c__Clostridia;o__BSA2B-08":0.0,"k__Bacteria;p__Firmicutes;c__Clostridia;o__Clostridiales":718.0,"k__Bacteria;p__Firmicutes;c__Clostridia;o__Halanaerobiales":0.0,"k__Bacteria;p__Firmicutes;c__Clostridia;o__MBA08":0.0,"k__Bacteria;p__Firmicutes;c__Clostridia;o__Natranaerobiales":0.0,"k__Bacteria;p__Firmicutes;c__Clostridia;o__OPB54":0.0,"k__Bacteria;p__Firmicutes;c__Clostridia;o__SHA-98":403.0,"k__Bacteria;p__Firmicutes;c__Clostridia;o__Thermoanaerobacterales":0.0,"k__Bacteria;p__Firmicutes;c__Erysipelotrichi;o__Erysipelotrichales":0.0,"k__Bacteria;p__Firmicutes;c__OPB54;o__":0.0,"k__Bacteria;p__NKB19;__;__":0.0,"k__Bacteria;p__NKB19;c__TSBW08;o__":0.0,"k__Bacteria;p__OD1;c__;o__":114.0,"k__Bacteria;p__OD1;c__ABY1;o__":5.0,"k__Bacteria;p__OP1;c__OPB14;o__":0.0,"k__Bacteria;p__OP8;c__OP8_1;__":98.0,"k__Bacteria;p__OP8;c__OP8_1;o__":54.0,"k__Bacteria;p__OP9;c__JS1;o__BA021":17.0,"k__Bacteria;p__OP9;c__OPB46;o__OPB72":37.0,"k__Bacteria;p__OP9;c__OPB46;o__SHA-1":45.0,"k__Bacteria;p__Proteobacteria;__;__":0.0,"k__Bacteria;p__Proteobacteria;c__Alphaproteobacteria;o__Caulobacterales":0.0,"k__Bacteria;p__Proteobacteria;c__Alphaproteobacteria;o__Rhizobiales":25.0,"k__Bacteria;p__Proteobacteria;c__Alphaproteobacteria;o__Rhodobacterales":0.0,"k__Bacteria;p__Proteobacteria;c__Alphaproteobacteria;o__Rhodospirillales":0.0,"k__Bacteria;p__Proteobacteria;c__Alphaproteobacteria;o__Sphingomonadales":0.0,"k__Bacteria;p__Proteobacteria;c__Betaproteobacteria;__":0.0,"k__Bacteria;p__Proteobacteria;c__Betaproteobacteria;o__Burkholderiales":53.0,"k__Bacteria;p__Proteobacteria;c__Betaproteobacteria;o__Rhodocyclales":0.0,"k__Bacteria;p__Proteobacteria;c__Betaproteobacteria;o__SC-I-84":0.0,"k__Bacteria;p__Proteobacteria;c__Deltaproteobacteria;o__GW-28":13.0,"k__Bacteria;p__Proteobacteria;c__Deltaproteobacteria;o__Myxococcales":0.0,"k__Bacteria;p__Proteobacteria;c__Deltaproteobacteria;o__Syntrophobacterales":9.0,"k__Bacteria;p__Proteobacteria;c__Epsilonproteobacteria;o__Campylobacterales":0.0,"k__Bacteria;p__Proteobacteria;c__Gammaproteobacteria;o__Enterobacteriales":0.0,"k__Bacteria;p__Proteobacteria;c__Gammaproteobacteria;o__Pseudomonadales":0.0,"k__Bacteria;p__Proteobacteria;c__Gammaproteobacteria;o__Xanthomonadales":0.0,"k__Bacteria;p__SAR406;c__AB16;o__noFP_H7":11.0,"k__Bacteria;p__SR1;c__;o__":0.0,"k__Bacteria;p__Spirochaetes;c__Spirochaetes;o__M2PT2-76":0.0,"k__Bacteria;p__Spirochaetes;c__Spirochaetes;o__Spirochaetales":762.0,"k__Bacteria;p__Spirochaetes;c__[Brachyspirae];o__[Brachyspirales]":0.0,"k__Bacteria;p__Spirochaetes;c__[Leptospirae];o__[Leptospirales]":0.0,"k__Bacteria;p__Synergistetes;c__Synergistia;o__Synergistales":22.0,"k__Bacteria;p__TA06;c__;o__":15.0,"k__Bacteria;p__TM6;c__SJA-4;o__S1198":0.0,"k__Bacteria;p__TM7;c__TM7-1;o__":44.0,"k__Bacteria;p__TM7;c__TM7-3;__":0.0,"k__Bacteria;p__TM7;c__TM7-3;o__":21.0,"k__Bacteria;p__TM7;c__TM7-3;o__I025":0.0,"k__Bacteria;p__Tenericutes;c__Mollicutes;o__RF39":0.0,"k__Bacteria;p__Tenericutes;c__RF3;o__ML615J-28":0.0,"k__Bacteria;p__Thermotogae;c__Thermotogae;o__Thermotogales":45.0,"k__Bacteria;p__Verrucomicrobia;c__Verruco-5;o__LD1-PB3":0.0,"k__Bacteria;p__Verrucomicrobia;c__[Pedosphaerae];o__[Pedosphaerales]":0.0,"k__Bacteria;p__WS6;c__SC72;o__A-2AF":4.0,"k__Bacteria;p__WWE1;c__[Cloacamonae];o__[Cloacamonales]":1492.0,"k__Bacteria;p__[Thermi];c__Deinococci;o__Deinococcales":0.0,"Process Day":"15","arsenite add.":"As60","plant no.":"#14","plant type":"SSD"},{"index":"U341F-U806R-P1-NW4-1-33-79","k__Archaea;p__Euryarchaeota;c__Methanobacteria;o__Methanobacteriales":87.0,"k__Archaea;p__Euryarchaeota;c__Methanomicrobia;o__Methanomicrobiales":228.0,"k__Archaea;p__Euryarchaeota;c__Methanomicrobia;o__Methanosarcinales":22.0,"k__Archaea;p__Euryarchaeota;c__Thermoplasmata;o__E2":9.0,"k__Bacteria;__;__;__":30.0,"k__Bacteria;p__;c__;o__":0.0,"k__Bacteria;p__Acidobacteria;c__BPC102;o__B110":0.0,"k__Bacteria;p__Acidobacteria;c__BPC102;o__MVS-40":0.0,"k__Bacteria;p__Acidobacteria;c__Sva0725;o__Sva0725":0.0,"k__Bacteria;p__Acidobacteria;c__[Chloracidobacteria];o__RB41":0.0,"k__Bacteria;p__Actinobacteria;c__;o__":0.0,"k__Bacteria;p__Actinobacteria;c__Acidimicrobiia;o__Acidimicrobiales":0.0,"k__Bacteria;p__Actinobacteria;c__Actinobacteria;o__Actinomycetales":22.0,"k__Bacteria;p__Actinobacteria;c__Actinobacteria;o__WCHB1-81":0.0,"k__Bacteria;p__Actinobacteria;c__Thermoleophilia;o__Gaiellales":0.0,"k__Bacteria;p__Actinobacteria;c__Thermoleophilia;o__Solirubrobacterales":0.0,"k__Bacteria;p__Bacteroidetes;__;__":1934.0,"k__Bacteria;p__Bacteroidetes;c__Bacteroidia;o__Bacteroidales":1147.0,"k__Bacteria;p__Bacteroidetes;c__Cytophagia;o__Cytophagales":258.0,"k__Bacteria;p__Bacteroidetes;c__Flavobacteriia;o__Flavobacteriales":0.0,"k__Bacteria;p__Bacteroidetes;c__Sphingobacteriia;o__Sphingobacteriales":0.0,"k__Bacteria;p__Bacteroidetes;c__[Saprospirae];o__[Saprospirales]":0.0,"k__Bacteria;p__Caldiserica;c__OP5;o__WCHB1-02":0.0,"k__Bacteria;p__Caldiserica;c__TTA-B1;o__":0.0,"k__Bacteria;p__Chlorobi;c__SJA-28;o__":0.0,"k__Bacteria;p__Chloroflexi;c__;o__":0.0,"k__Bacteria;p__Chloroflexi;c__Anaerolineae;o__":0.0,"k__Bacteria;p__Chloroflexi;c__Anaerolineae;o__Anaerolineales":0.0,"k__Bacteria;p__Chloroflexi;c__Anaerolineae;o__Caldilineales":0.0,"k__Bacteria;p__Chloroflexi;c__Anaerolineae;o__OPB11":0.0,"k__Bacteria;p__Chloroflexi;c__Anaerolineae;o__SHA-20":0.0,"k__Bacteria;p__Chloroflexi;c__Anaerolineae;o__WCHB1-50":0.0,"k__Bacteria;p__Chloroflexi;c__Ellin6529;o__":0.0,"k__Bacteria;p__Chloroflexi;c__SHA-26;o__":0.0,"k__Bacteria;p__Cyanobacteria;c__4C0d-2;o__MLE1-12":0.0,"k__Bacteria;p__Cyanobacteria;c__Chloroplast;o__Chlorophyta":0.0,"k__Bacteria;p__EM3;c__;o__":0.0,"k__Bacteria;p__Fibrobacteres;c__TG3;o__TG3-1":0.0,"k__Bacteria;p__Firmicutes;c__Bacilli;o__Bacillales":0.0,"k__Bacteria;p__Firmicutes;c__Bacilli;o__Lactobacillales":67.0,"k__Bacteria;p__Firmicutes;c__Bacilli;o__Turicibacterales":15.0,"k__Bacteria;p__Firmicutes;c__Clostridia;__":10.0,"k__Bacteria;p__Firmicutes;c__Clostridia;o__":14.0,"k__Bacteria;p__Firmicutes;c__Clostridia;o__BSA2B-08":10.0,"k__Bacteria;p__Firmicutes;c__Clostridia;o__Clostridiales":3897.0,"k__Bacteria;p__Firmicutes;c__Clostridia;o__Halanaerobiales":369.0,"k__Bacteria;p__Firmicutes;c__Clostridia;o__MBA08":6250.0,"k__Bacteria;p__Firmicutes;c__Clostridia;o__Natranaerobiales":82.0,"k__Bacteria;p__Firmicutes;c__Clostridia;o__OPB54":94.0,"k__Bacteria;p__Firmicutes;c__Clostridia;o__SHA-98":805.0,"k__Bacteria;p__Firmicutes;c__Clostridia;o__Thermoanaerobacterales":298.0,"k__Bacteria;p__Firmicutes;c__Erysipelotrichi;o__Erysipelotrichales":0.0,"k__Bacteria;p__Firmicutes;c__OPB54;o__":79.0,"k__Bacteria;p__NKB19;__;__":0.0,"k__Bacteria;p__NKB19;c__TSBW08;o__":0.0,"k__Bacteria;p__OD1;c__;o__":0.0,"k__Bacteria;p__OD1;c__ABY1;o__":0.0,"k__Bacteria;p__OP1;c__OPB14;o__":0.0,"k__Bacteria;p__OP8;c__OP8_1;__":0.0,"k__Bacteria;p__OP8;c__OP8_1;o__":0.0,"k__Bacteria;p__OP9;c__JS1;o__BA021":0.0,"k__Bacteria;p__OP9;c__OPB46;o__OPB72":50.0,"k__Bacteria;p__OP9;c__OPB46;o__SHA-1":0.0,"k__Bacteria;p__Proteobacteria;__;__":0.0,"k__Bacteria;p__Proteobacteria;c__Alphaproteobacteria;o__Caulobacterales":0.0,"k__Bacteria;p__Proteobacteria;c__Alphaproteobacteria;o__Rhizobiales":37.0,"k__Bacteria;p__Proteobacteria;c__Alphaproteobacteria;o__Rhodobacterales":0.0,"k__Bacteria;p__Proteobacteria;c__Alphaproteobacteria;o__Rhodospirillales":0.0,"k__Bacteria;p__Proteobacteria;c__Alphaproteobacteria;o__Sphingomonadales":0.0,"k__Bacteria;p__Proteobacteria;c__Betaproteobacteria;__":0.0,"k__Bacteria;p__Proteobacteria;c__Betaproteobacteria;o__Burkholderiales":0.0,"k__Bacteria;p__Proteobacteria;c__Betaproteobacteria;o__Rhodocyclales":0.0,"k__Bacteria;p__Proteobacteria;c__Betaproteobacteria;o__SC-I-84":0.0,"k__Bacteria;p__Proteobacteria;c__Deltaproteobacteria;o__GW-28":0.0,"k__Bacteria;p__Proteobacteria;c__Deltaproteobacteria;o__Myxococcales":0.0,"k__Bacteria;p__Proteobacteria;c__Deltaproteobacteria;o__Syntrophobacterales":0.0,"k__Bacteria;p__Proteobacteria;c__Epsilonproteobacteria;o__Campylobacterales":0.0,"k__Bacteria;p__Proteobacteria;c__Gammaproteobacteria;o__Enterobacteriales":0.0,"k__Bacteria;p__Proteobacteria;c__Gammaproteobacteria;o__Pseudomonadales":0.0,"k__Bacteria;p__Proteobacteria;c__Gammaproteobacteria;o__Xanthomonadales":0.0,"k__Bacteria;p__SAR406;c__AB16;o__noFP_H7":0.0,"k__Bacteria;p__SR1;c__;o__":0.0,"k__Bacteria;p__Spirochaetes;c__Spirochaetes;o__M2PT2-76":0.0,"k__Bacteria;p__Spirochaetes;c__Spirochaetes;o__Spirochaetales":11.0,"k__Bacteria;p__Spirochaetes;c__[Brachyspirae];o__[Brachyspirales]":0.0,"k__Bacteria;p__Spirochaetes;c__[Leptospirae];o__[Leptospirales]":0.0,"k__Bacteria;p__Synergistetes;c__Synergistia;o__Synergistales":197.0,"k__Bacteria;p__TA06;c__;o__":0.0,"k__Bacteria;p__TM6;c__SJA-4;o__S1198":0.0,"k__Bacteria;p__TM7;c__TM7-1;o__":0.0,"k__Bacteria;p__TM7;c__TM7-3;__":0.0,"k__Bacteria;p__TM7;c__TM7-3;o__":0.0,"k__Bacteria;p__TM7;c__TM7-3;o__I025":0.0,"k__Bacteria;p__Tenericutes;c__Mollicutes;o__RF39":0.0,"k__Bacteria;p__Tenericutes;c__RF3;o__ML615J-28":379.0,"k__Bacteria;p__Thermotogae;c__Thermotogae;o__Thermotogales":844.0,"k__Bacteria;p__Verrucomicrobia;c__Verruco-5;o__LD1-PB3":0.0,"k__Bacteria;p__Verrucomicrobia;c__[Pedosphaerae];o__[Pedosphaerales]":0.0,"k__Bacteria;p__WS6;c__SC72;o__A-2AF":0.0,"k__Bacteria;p__WWE1;c__[Cloacamonae];o__[Cloacamonales]":9.0,"k__Bacteria;p__[Thermi];c__Deinococci;o__Deinococcales":0.0,"Process Day":"01","arsenite add.":"As0","plant no.":"#01","plant type":"Biogas"},{"index":"U341F-U806R-P1-NW4-1-33-80","k__Archaea;p__Euryarchaeota;c__Methanobacteria;o__Methanobacteriales":52.0,"k__Archaea;p__Euryarchaeota;c__Methanomicrobia;o__Methanomicrobiales":111.0,"k__Archaea;p__Euryarchaeota;c__Methanomicrobia;o__Methanosarcinales":14.0,"k__Archaea;p__Euryarchaeota;c__Thermoplasmata;o__E2":0.0,"k__Bacteria;__;__;__":16.0,"k__Bacteria;p__;c__;o__":0.0,"k__Bacteria;p__Acidobacteria;c__BPC102;o__B110":0.0,"k__Bacteria;p__Acidobacteria;c__BPC102;o__MVS-40":0.0,"k__Bacteria;p__Acidobacteria;c__Sva0725;o__Sva0725":0.0,"k__Bacteria;p__Acidobacteria;c__[Chloracidobacteria];o__RB41":0.0,"k__Bacteria;p__Actinobacteria;c__;o__":0.0,"k__Bacteria;p__Actinobacteria;c__Acidimicrobiia;o__Acidimicrobiales":0.0,"k__Bacteria;p__Actinobacteria;c__Actinobacteria;o__Actinomycetales":14.0,"k__Bacteria;p__Actinobacteria;c__Actinobacteria;o__WCHB1-81":0.0,"k__Bacteria;p__Actinobacteria;c__Thermoleophilia;o__Gaiellales":0.0,"k__Bacteria;p__Actinobacteria;c__Thermoleophilia;o__Solirubrobacterales":0.0,"k__Bacteria;p__Bacteroidetes;__;__":1241.0,"k__Bacteria;p__Bacteroidetes;c__Bacteroidia;o__Bacteroidales":765.0,"k__Bacteria;p__Bacteroidetes;c__Cytophagia;o__Cytophagales":153.0,"k__Bacteria;p__Bacteroidetes;c__Flavobacteriia;o__Flavobacteriales":0.0,"k__Bacteria;p__Bacteroidetes;c__Sphingobacteriia;o__Sphingobacteriales":0.0,"k__Bacteria;p__Bacteroidetes;c__[Saprospirae];o__[Saprospirales]":0.0,"k__Bacteria;p__Caldiserica;c__OP5;o__WCHB1-02":0.0,"k__Bacteria;p__Caldiserica;c__TTA-B1;o__":0.0,"k__Bacteria;p__Chlorobi;c__SJA-28;o__":0.0,"k__Bacteria;p__Chloroflexi;c__;o__":0.0,"k__Bacteria;p__Chloroflexi;c__Anaerolineae;o__":0.0,"k__Bacteria;p__Chloroflexi;c__Anaerolineae;o__Anaerolineales":0.0,"k__Bacteria;p__Chloroflexi;c__Anaerolineae;o__Caldilineales":0.0,"k__Bacteria;p__Chloroflexi;c__Anaerolineae;o__OPB11":0.0,"k__Bacteria;p__Chloroflexi;c__Anaerolineae;o__SHA-20":0.0,"k__Bacteria;p__Chloroflexi;c__Anaerolineae;o__WCHB1-50":0.0,"k__Bacteria;p__Chloroflexi;c__Ellin6529;o__":0.0,"k__Bacteria;p__Chloroflexi;c__SHA-26;o__":0.0,"k__Bacteria;p__Cyanobacteria;c__4C0d-2;o__MLE1-12":0.0,"k__Bacteria;p__Cyanobacteria;c__Chloroplast;o__Chlorophyta":0.0,"k__Bacteria;p__EM3;c__;o__":0.0,"k__Bacteria;p__Fibrobacteres;c__TG3;o__TG3-1":0.0,"k__Bacteria;p__Firmicutes;c__Bacilli;o__Bacillales":0.0,"k__Bacteria;p__Firmicutes;c__Bacilli;o__Lactobacillales":62.0,"k__Bacteria;p__Firmicutes;c__Bacilli;o__Turicibacterales":12.0,"k__Bacteria;p__Firmicutes;c__Clostridia;__":15.0,"k__Bacteria;p__Firmicutes;c__Clostridia;o__":9.0,"k__Bacteria;p__Firmicutes;c__Clostridia;o__BSA2B-08":0.0,"k__Bacteria;p__Firmicutes;c__Clostridia;o__Clostridiales":2054.0,"k__Bacteria;p__Firmicutes;c__Clostridia;o__Halanaerobiales":209.0,"k__Bacteria;p__Firmicutes;c__Clostridia;o__MBA08":4926.0,"k__Bacteria;p__Firmicutes;c__Clostridia;o__Natranaerobiales":91.0,"k__Bacteria;p__Firmicutes;c__Clostridia;o__OPB54":34.0,"k__Bacteria;p__Firmicutes;c__Clostridia;o__SHA-98":617.0,"k__Bacteria;p__Firmicutes;c__Clostridia;o__Thermoanaerobacterales":223.0,"k__Bacteria;p__Firmicutes;c__Erysipelotrichi;o__Erysipelotrichales":6.0,"k__Bacteria;p__Firmicutes;c__OPB54;o__":67.0,"k__Bacteria;p__NKB19;__;__":0.0,"k__Bacteria;p__NKB19;c__TSBW08;o__":0.0,"k__Bacteria;p__OD1;c__;o__":0.0,"k__Bacteria;p__OD1;c__ABY1;o__":0.0,"k__Bacteria;p__OP1;c__OPB14;o__":0.0,"k__Bacteria;p__OP8;c__OP8_1;__":0.0,"k__Bacteria;p__OP8;c__OP8_1;o__":0.0,"k__Bacteria;p__OP9;c__JS1;o__BA021":0.0,"k__Bacteria;p__OP9;c__OPB46;o__OPB72":56.0,"k__Bacteria;p__OP9;c__OPB46;o__SHA-1":0.0,"k__Bacteria;p__Proteobacteria;__;__":0.0,"k__Bacteria;p__Proteobacteria;c__Alphaproteobacteria;o__Caulobacterales":0.0,"k__Bacteria;p__Proteobacteria;c__Alphaproteobacteria;o__Rhizobiales":0.0,"k__Bacteria;p__Proteobacteria;c__Alphaproteobacteria;o__Rhodobacterales":0.0,"k__Bacteria;p__Proteobacteria;c__Alphaproteobacteria;o__Rhodospirillales":0.0,"k__Bacteria;p__Proteobacteria;c__Alphaproteobacteria;o__Sphingomonadales":0.0,"k__Bacteria;p__Proteobacteria;c__Betaproteobacteria;__":0.0,"k__Bacteria;p__Proteobacteria;c__Betaproteobacteria;o__Burkholderiales":0.0,"k__Bacteria;p__Proteobacteria;c__Betaproteobacteria;o__Rhodocyclales":0.0,"k__Bacteria;p__Proteobacteria;c__Betaproteobacteria;o__SC-I-84":0.0,"k__Bacteria;p__Proteobacteria;c__Deltaproteobacteria;o__GW-28":0.0,"k__Bacteria;p__Proteobacteria;c__Deltaproteobacteria;o__Myxococcales":0.0,"k__Bacteria;p__Proteobacteria;c__Deltaproteobacteria;o__Syntrophobacterales":0.0,"k__Bacteria;p__Proteobacteria;c__Epsilonproteobacteria;o__Campylobacterales":0.0,"k__Bacteria;p__Proteobacteria;c__Gammaproteobacteria;o__Enterobacteriales":0.0,"k__Bacteria;p__Proteobacteria;c__Gammaproteobacteria;o__Pseudomonadales":0.0,"k__Bacteria;p__Proteobacteria;c__Gammaproteobacteria;o__Xanthomonadales":0.0,"k__Bacteria;p__SAR406;c__AB16;o__noFP_H7":0.0,"k__Bacteria;p__SR1;c__;o__":0.0,"k__Bacteria;p__Spirochaetes;c__Spirochaetes;o__M2PT2-76":0.0,"k__Bacteria;p__Spirochaetes;c__Spirochaetes;o__Spirochaetales":0.0,"k__Bacteria;p__Spirochaetes;c__[Brachyspirae];o__[Brachyspirales]":0.0,"k__Bacteria;p__Spirochaetes;c__[Leptospirae];o__[Leptospirales]":0.0,"k__Bacteria;p__Synergistetes;c__Synergistia;o__Synergistales":167.0,"k__Bacteria;p__TA06;c__;o__":0.0,"k__Bacteria;p__TM6;c__SJA-4;o__S1198":0.0,"k__Bacteria;p__TM7;c__TM7-1;o__":0.0,"k__Bacteria;p__TM7;c__TM7-3;__":0.0,"k__Bacteria;p__TM7;c__TM7-3;o__":0.0,"k__Bacteria;p__TM7;c__TM7-3;o__I025":0.0,"k__Bacteria;p__Tenericutes;c__Mollicutes;o__RF39":0.0,"k__Bacteria;p__Tenericutes;c__RF3;o__ML615J-28":188.0,"k__Bacteria;p__Thermotogae;c__Thermotogae;o__Thermotogales":688.0,"k__Bacteria;p__Verrucomicrobia;c__Verruco-5;o__LD1-PB3":0.0,"k__Bacteria;p__Verrucomicrobia;c__[Pedosphaerae];o__[Pedosphaerales]":0.0,"k__Bacteria;p__WS6;c__SC72;o__A-2AF":0.0,"k__Bacteria;p__WWE1;c__[Cloacamonae];o__[Cloacamonales]":0.0,"k__Bacteria;p__[Thermi];c__Deinococci;o__Deinococcales":0.0,"Process Day":"01","arsenite add.":"As0","plant no.":"#01","plant type":"Biogas"},{"index":"U341F-U806R-P1-NW4-1-34-82","k__Archaea;p__Euryarchaeota;c__Methanobacteria;o__Methanobacteriales":27.0,"k__Archaea;p__Euryarchaeota;c__Methanomicrobia;o__Methanomicrobiales":82.0,"k__Archaea;p__Euryarchaeota;c__Methanomicrobia;o__Methanosarcinales":8.0,"k__Archaea;p__Euryarchaeota;c__Thermoplasmata;o__E2":0.0,"k__Bacteria;__;__;__":28.0,"k__Bacteria;p__;c__;o__":0.0,"k__Bacteria;p__Acidobacteria;c__BPC102;o__B110":0.0,"k__Bacteria;p__Acidobacteria;c__BPC102;o__MVS-40":0.0,"k__Bacteria;p__Acidobacteria;c__Sva0725;o__Sva0725":0.0,"k__Bacteria;p__Acidobacteria;c__[Chloracidobacteria];o__RB41":0.0,"k__Bacteria;p__Actinobacteria;c__;o__":0.0,"k__Bacteria;p__Actinobacteria;c__Acidimicrobiia;o__Acidimicrobiales":0.0,"k__Bacteria;p__Actinobacteria;c__Actinobacteria;o__Actinomycetales":0.0,"k__Bacteria;p__Actinobacteria;c__Actinobacteria;o__WCHB1-81":0.0,"k__Bacteria;p__Actinobacteria;c__Thermoleophilia;o__Gaiellales":0.0,"k__Bacteria;p__Actinobacteria;c__Thermoleophilia;o__Solirubrobacterales":0.0,"k__Bacteria;p__Bacteroidetes;__;__":492.0,"k__Bacteria;p__Bacteroidetes;c__Bacteroidia;o__Bacteroidales":604.0,"k__Bacteria;p__Bacteroidetes;c__Cytophagia;o__Cytophagales":0.0,"k__Bacteria;p__Bacteroidetes;c__Flavobacteriia;o__Flavobacteriales":0.0,"k__Bacteria;p__Bacteroidetes;c__Sphingobacteriia;o__Sphingobacteriales":0.0,"k__Bacteria;p__Bacteroidetes;c__[Saprospirae];o__[Saprospirales]":0.0,"k__Bacteria;p__Caldiserica;c__OP5;o__WCHB1-02":0.0,"k__Bacteria;p__Caldiserica;c__TTA-B1;o__":0.0,"k__Bacteria;p__Chlorobi;c__SJA-28;o__":0.0,"k__Bacteria;p__Chloroflexi;c__;o__":0.0,"k__Bacteria;p__Chloroflexi;c__Anaerolineae;o__":0.0,"k__Bacteria;p__Chloroflexi;c__Anaerolineae;o__Anaerolineales":0.0,"k__Bacteria;p__Chloroflexi;c__Anaerolineae;o__Caldilineales":0.0,"k__Bacteria;p__Chloroflexi;c__Anaerolineae;o__OPB11":0.0,"k__Bacteria;p__Chloroflexi;c__Anaerolineae;o__SHA-20":0.0,"k__Bacteria;p__Chloroflexi;c__Anaerolineae;o__WCHB1-50":0.0,"k__Bacteria;p__Chloroflexi;c__Ellin6529;o__":0.0,"k__Bacteria;p__Chloroflexi;c__SHA-26;o__":0.0,"k__Bacteria;p__Cyanobacteria;c__4C0d-2;o__MLE1-12":0.0,"k__Bacteria;p__Cyanobacteria;c__Chloroplast;o__Chlorophyta":0.0,"k__Bacteria;p__EM3;c__;o__":0.0,"k__Bacteria;p__Fibrobacteres;c__TG3;o__TG3-1":42.0,"k__Bacteria;p__Firmicutes;c__Bacilli;o__Bacillales":0.0,"k__Bacteria;p__Firmicutes;c__Bacilli;o__Lactobacillales":16.0,"k__Bacteria;p__Firmicutes;c__Bacilli;o__Turicibacterales":0.0,"k__Bacteria;p__Firmicutes;c__Clostridia;__":0.0,"k__Bacteria;p__Firmicutes;c__Clostridia;o__":0.0,"k__Bacteria;p__Firmicutes;c__Clostridia;o__BSA2B-08":0.0,"k__Bacteria;p__Firmicutes;c__Clostridia;o__Clostridiales":387.0,"k__Bacteria;p__Firmicutes;c__Clostridia;o__Halanaerobiales":8.0,"k__Bacteria;p__Firmicutes;c__Clostridia;o__MBA08":2293.0,"k__Bacteria;p__Firmicutes;c__Clostridia;o__Natranaerobiales":25.0,"k__Bacteria;p__Firmicutes;c__Clostridia;o__OPB54":12.0,"k__Bacteria;p__Firmicutes;c__Clostridia;o__SHA-98":281.0,"k__Bacteria;p__Firmicutes;c__Clostridia;o__Thermoanaerobacterales":62.0,"k__Bacteria;p__Firmicutes;c__Erysipelotrichi;o__Erysipelotrichales":0.0,"k__Bacteria;p__Firmicutes;c__OPB54;o__":33.0,"k__Bacteria;p__NKB19;__;__":0.0,"k__Bacteria;p__NKB19;c__TSBW08;o__":0.0,"k__Bacteria;p__OD1;c__;o__":0.0,"k__Bacteria;p__OD1;c__ABY1;o__":0.0,"k__Bacteria;p__OP1;c__OPB14;o__":0.0,"k__Bacteria;p__OP8;c__OP8_1;__":0.0,"k__Bacteria;p__OP8;c__OP8_1;o__":0.0,"k__Bacteria;p__OP9;c__JS1;o__BA021":0.0,"k__Bacteria;p__OP9;c__OPB46;o__OPB72":18.0,"k__Bacteria;p__OP9;c__OPB46;o__SHA-1":0.0,"k__Bacteria;p__Proteobacteria;__;__":0.0,"k__Bacteria;p__Proteobacteria;c__Alphaproteobacteria;o__Caulobacterales":0.0,"k__Bacteria;p__Proteobacteria;c__Alphaproteobacteria;o__Rhizobiales":0.0,"k__Bacteria;p__Proteobacteria;c__Alphaproteobacteria;o__Rhodobacterales":0.0,"k__Bacteria;p__Proteobacteria;c__Alphaproteobacteria;o__Rhodospirillales":0.0,"k__Bacteria;p__Proteobacteria;c__Alphaproteobacteria;o__Sphingomonadales":0.0,"k__Bacteria;p__Proteobacteria;c__Betaproteobacteria;__":0.0,"k__Bacteria;p__Proteobacteria;c__Betaproteobacteria;o__Burkholderiales":0.0,"k__Bacteria;p__Proteobacteria;c__Betaproteobacteria;o__Rhodocyclales":0.0,"k__Bacteria;p__Proteobacteria;c__Betaproteobacteria;o__SC-I-84":0.0,"k__Bacteria;p__Proteobacteria;c__Deltaproteobacteria;o__GW-28":0.0,"k__Bacteria;p__Proteobacteria;c__Deltaproteobacteria;o__Myxococcales":0.0,"k__Bacteria;p__Proteobacteria;c__Deltaproteobacteria;o__Syntrophobacterales":0.0,"k__Bacteria;p__Proteobacteria;c__Epsilonproteobacteria;o__Campylobacterales":0.0,"k__Bacteria;p__Proteobacteria;c__Gammaproteobacteria;o__Enterobacteriales":0.0,"k__Bacteria;p__Proteobacteria;c__Gammaproteobacteria;o__Pseudomonadales":0.0,"k__Bacteria;p__Proteobacteria;c__Gammaproteobacteria;o__Xanthomonadales":0.0,"k__Bacteria;p__SAR406;c__AB16;o__noFP_H7":0.0,"k__Bacteria;p__SR1;c__;o__":8.0,"k__Bacteria;p__Spirochaetes;c__Spirochaetes;o__M2PT2-76":0.0,"k__Bacteria;p__Spirochaetes;c__Spirochaetes;o__Spirochaetales":0.0,"k__Bacteria;p__Spirochaetes;c__[Brachyspirae];o__[Brachyspirales]":0.0,"k__Bacteria;p__Spirochaetes;c__[Leptospirae];o__[Leptospirales]":0.0,"k__Bacteria;p__Synergistetes;c__Synergistia;o__Synergistales":55.0,"k__Bacteria;p__TA06;c__;o__":0.0,"k__Bacteria;p__TM6;c__SJA-4;o__S1198":0.0,"k__Bacteria;p__TM7;c__TM7-1;o__":0.0,"k__Bacteria;p__TM7;c__TM7-3;__":0.0,"k__Bacteria;p__TM7;c__TM7-3;o__":0.0,"k__Bacteria;p__TM7;c__TM7-3;o__I025":0.0,"k__Bacteria;p__Tenericutes;c__Mollicutes;o__RF39":0.0,"k__Bacteria;p__Tenericutes;c__RF3;o__ML615J-28":130.0,"k__Bacteria;p__Thermotogae;c__Thermotogae;o__Thermotogales":355.0,"k__Bacteria;p__Verrucomicrobia;c__Verruco-5;o__LD1-PB3":0.0,"k__Bacteria;p__Verrucomicrobia;c__[Pedosphaerae];o__[Pedosphaerales]":0.0,"k__Bacteria;p__WS6;c__SC72;o__A-2AF":0.0,"k__Bacteria;p__WWE1;c__[Cloacamonae];o__[Cloacamonales]":0.0,"k__Bacteria;p__[Thermi];c__Deinococci;o__Deinococcales":0.0,"Process Day":"15","arsenite add.":"As0","plant no.":"#01","plant type":"Biogas"},{"index":"U341F-U806R-P1-NW4-1-34-83","k__Archaea;p__Euryarchaeota;c__Methanobacteria;o__Methanobacteriales":49.0,"k__Archaea;p__Euryarchaeota;c__Methanomicrobia;o__Methanomicrobiales":135.0,"k__Archaea;p__Euryarchaeota;c__Methanomicrobia;o__Methanosarcinales":8.0,"k__Archaea;p__Euryarchaeota;c__Thermoplasmata;o__E2":0.0,"k__Bacteria;__;__;__":55.0,"k__Bacteria;p__;c__;o__":0.0,"k__Bacteria;p__Acidobacteria;c__BPC102;o__B110":0.0,"k__Bacteria;p__Acidobacteria;c__BPC102;o__MVS-40":0.0,"k__Bacteria;p__Acidobacteria;c__Sva0725;o__Sva0725":0.0,"k__Bacteria;p__Acidobacteria;c__[Chloracidobacteria];o__RB41":0.0,"k__Bacteria;p__Actinobacteria;c__;o__":0.0,"k__Bacteria;p__Actinobacteria;c__Acidimicrobiia;o__Acidimicrobiales":0.0,"k__Bacteria;p__Actinobacteria;c__Actinobacteria;o__Actinomycetales":23.0,"k__Bacteria;p__Actinobacteria;c__Actinobacteria;o__WCHB1-81":0.0,"k__Bacteria;p__Actinobacteria;c__Thermoleophilia;o__Gaiellales":0.0,"k__Bacteria;p__Actinobacteria;c__Thermoleophilia;o__Solirubrobacterales":0.0,"k__Bacteria;p__Bacteroidetes;__;__":745.0,"k__Bacteria;p__Bacteroidetes;c__Bacteroidia;o__Bacteroidales":962.0,"k__Bacteria;p__Bacteroidetes;c__Cytophagia;o__Cytophagales":107.0,"k__Bacteria;p__Bacteroidetes;c__Flavobacteriia;o__Flavobacteriales":0.0,"k__Bacteria;p__Bacteroidetes;c__Sphingobacteriia;o__Sphingobacteriales":0.0,"k__Bacteria;p__Bacteroidetes;c__[Saprospirae];o__[Saprospirales]":0.0,"k__Bacteria;p__Caldiserica;c__OP5;o__WCHB1-02":0.0,"k__Bacteria;p__Caldiserica;c__TTA-B1;o__":0.0,"k__Bacteria;p__Chlorobi;c__SJA-28;o__":0.0,"k__Bacteria;p__Chloroflexi;c__;o__":0.0,"k__Bacteria;p__Chloroflexi;c__Anaerolineae;o__":0.0,"k__Bacteria;p__Chloroflexi;c__Anaerolineae;o__Anaerolineales":0.0,"k__Bacteria;p__Chloroflexi;c__Anaerolineae;o__Caldilineales":0.0,"k__Bacteria;p__Chloroflexi;c__Anaerolineae;o__OPB11":0.0,"k__Bacteria;p__Chloroflexi;c__Anaerolineae;o__SHA-20":0.0,"k__Bacteria;p__Chloroflexi;c__Anaerolineae;o__WCHB1-50":0.0,"k__Bacteria;p__Chloroflexi;c__Ellin6529;o__":0.0,"k__Bacteria;p__Chloroflexi;c__SHA-26;o__":0.0,"k__Bacteria;p__Cyanobacteria;c__4C0d-2;o__MLE1-12":0.0,"k__Bacteria;p__Cyanobacteria;c__Chloroplast;o__Chlorophyta":0.0,"k__Bacteria;p__EM3;c__;o__":0.0,"k__Bacteria;p__Fibrobacteres;c__TG3;o__TG3-1":48.0,"k__Bacteria;p__Firmicutes;c__Bacilli;o__Bacillales":0.0,"k__Bacteria;p__Firmicutes;c__Bacilli;o__Lactobacillales":16.0,"k__Bacteria;p__Firmicutes;c__Bacilli;o__Turicibacterales":0.0,"k__Bacteria;p__Firmicutes;c__Clostridia;__":3.0,"k__Bacteria;p__Firmicutes;c__Clostridia;o__":7.0,"k__Bacteria;p__Firmicutes;c__Clostridia;o__BSA2B-08":0.0,"k__Bacteria;p__Firmicutes;c__Clostridia;o__Clostridiales":686.0,"k__Bacteria;p__Firmicutes;c__Clostridia;o__Halanaerobiales":8.0,"k__Bacteria;p__Firmicutes;c__Clostridia;o__MBA08":4162.0,"k__Bacteria;p__Firmicutes;c__Clostridia;o__Natranaerobiales":32.0,"k__Bacteria;p__Firmicutes;c__Clostridia;o__OPB54":24.0,"k__Bacteria;p__Firmicutes;c__Clostridia;o__SHA-98":613.0,"k__Bacteria;p__Firmicutes;c__Clostridia;o__Thermoanaerobacterales":92.0,"k__Bacteria;p__Firmicutes;c__Erysipelotrichi;o__Erysipelotrichales":0.0,"k__Bacteria;p__Firmicutes;c__OPB54;o__":77.0,"k__Bacteria;p__NKB19;__;__":0.0,"k__Bacteria;p__NKB19;c__TSBW08;o__":0.0,"k__Bacteria;p__OD1;c__;o__":0.0,"k__Bacteria;p__OD1;c__ABY1;o__":0.0,"k__Bacteria;p__OP1;c__OPB14;o__":0.0,"k__Bacteria;p__OP8;c__OP8_1;__":0.0,"k__Bacteria;p__OP8;c__OP8_1;o__":0.0,"k__Bacteria;p__OP9;c__JS1;o__BA021":0.0,"k__Bacteria;p__OP9;c__OPB46;o__OPB72":44.0,"k__Bacteria;p__OP9;c__OPB46;o__SHA-1":0.0,"k__Bacteria;p__Proteobacteria;__;__":0.0,"k__Bacteria;p__Proteobacteria;c__Alphaproteobacteria;o__Caulobacterales":0.0,"k__Bacteria;p__Proteobacteria;c__Alphaproteobacteria;o__Rhizobiales":0.0,"k__Bacteria;p__Proteobacteria;c__Alphaproteobacteria;o__Rhodobacterales":0.0,"k__Bacteria;p__Proteobacteria;c__Alphaproteobacteria;o__Rhodospirillales":0.0,"k__Bacteria;p__Proteobacteria;c__Alphaproteobacteria;o__Sphingomonadales":0.0,"k__Bacteria;p__Proteobacteria;c__Betaproteobacteria;__":0.0,"k__Bacteria;p__Proteobacteria;c__Betaproteobacteria;o__Burkholderiales":0.0,"k__Bacteria;p__Proteobacteria;c__Betaproteobacteria;o__Rhodocyclales":0.0,"k__Bacteria;p__Proteobacteria;c__Betaproteobacteria;o__SC-I-84":0.0,"k__Bacteria;p__Proteobacteria;c__Deltaproteobacteria;o__GW-28":0.0,"k__Bacteria;p__Proteobacteria;c__Deltaproteobacteria;o__Myxococcales":0.0,"k__Bacteria;p__Proteobacteria;c__Deltaproteobacteria;o__Syntrophobacterales":0.0,"k__Bacteria;p__Proteobacteria;c__Epsilonproteobacteria;o__Campylobacterales":0.0,"k__Bacteria;p__Proteobacteria;c__Gammaproteobacteria;o__Enterobacteriales":0.0,"k__Bacteria;p__Proteobacteria;c__Gammaproteobacteria;o__Pseudomonadales":0.0,"k__Bacteria;p__Proteobacteria;c__Gammaproteobacteria;o__Xanthomonadales":0.0,"k__Bacteria;p__SAR406;c__AB16;o__noFP_H7":0.0,"k__Bacteria;p__SR1;c__;o__":11.0,"k__Bacteria;p__Spirochaetes;c__Spirochaetes;o__M2PT2-76":0.0,"k__Bacteria;p__Spirochaetes;c__Spirochaetes;o__Spirochaetales":0.0,"k__Bacteria;p__Spirochaetes;c__[Brachyspirae];o__[Brachyspirales]":0.0,"k__Bacteria;p__Spirochaetes;c__[Leptospirae];o__[Leptospirales]":0.0,"k__Bacteria;p__Synergistetes;c__Synergistia;o__Synergistales":119.0,"k__Bacteria;p__TA06;c__;o__":0.0,"k__Bacteria;p__TM6;c__SJA-4;o__S1198":0.0,"k__Bacteria;p__TM7;c__TM7-1;o__":0.0,"k__Bacteria;p__TM7;c__TM7-3;__":0.0,"k__Bacteria;p__TM7;c__TM7-3;o__":0.0,"k__Bacteria;p__TM7;c__TM7-3;o__I025":0.0,"k__Bacteria;p__Tenericutes;c__Mollicutes;o__RF39":6.0,"k__Bacteria;p__Tenericutes;c__RF3;o__ML615J-28":263.0,"k__Bacteria;p__Thermotogae;c__Thermotogae;o__Thermotogales":570.0,"k__Bacteria;p__Verrucomicrobia;c__Verruco-5;o__LD1-PB3":0.0,"k__Bacteria;p__Verrucomicrobia;c__[Pedosphaerae];o__[Pedosphaerales]":0.0,"k__Bacteria;p__WS6;c__SC72;o__A-2AF":0.0,"k__Bacteria;p__WWE1;c__[Cloacamonae];o__[Cloacamonales]":0.0,"k__Bacteria;p__[Thermi];c__Deinococci;o__Deinococcales":0.0,"Process Day":"15","arsenite add.":"As0","plant no.":"#01","plant type":"Biogas"},{"index":"U341F-U806R-P1-NW4-1-36-88","k__Archaea;p__Euryarchaeota;c__Methanobacteria;o__Methanobacteriales":20.0,"k__Archaea;p__Euryarchaeota;c__Methanomicrobia;o__Methanomicrobiales":121.0,"k__Archaea;p__Euryarchaeota;c__Methanomicrobia;o__Methanosarcinales":24.0,"k__Archaea;p__Euryarchaeota;c__Thermoplasmata;o__E2":8.0,"k__Bacteria;__;__;__":56.0,"k__Bacteria;p__;c__;o__":0.0,"k__Bacteria;p__Acidobacteria;c__BPC102;o__B110":0.0,"k__Bacteria;p__Acidobacteria;c__BPC102;o__MVS-40":0.0,"k__Bacteria;p__Acidobacteria;c__Sva0725;o__Sva0725":0.0,"k__Bacteria;p__Acidobacteria;c__[Chloracidobacteria];o__RB41":0.0,"k__Bacteria;p__Actinobacteria;c__;o__":0.0,"k__Bacteria;p__Actinobacteria;c__Acidimicrobiia;o__Acidimicrobiales":0.0,"k__Bacteria;p__Actinobacteria;c__Actinobacteria;o__Actinomycetales":0.0,"k__Bacteria;p__Actinobacteria;c__Actinobacteria;o__WCHB1-81":0.0,"k__Bacteria;p__Actinobacteria;c__Thermoleophilia;o__Gaiellales":0.0,"k__Bacteria;p__Actinobacteria;c__Thermoleophilia;o__Solirubrobacterales":0.0,"k__Bacteria;p__Bacteroidetes;__;__":903.0,"k__Bacteria;p__Bacteroidetes;c__Bacteroidia;o__Bacteroidales":826.0,"k__Bacteria;p__Bacteroidetes;c__Cytophagia;o__Cytophagales":109.0,"k__Bacteria;p__Bacteroidetes;c__Flavobacteriia;o__Flavobacteriales":0.0,"k__Bacteria;p__Bacteroidetes;c__Sphingobacteriia;o__Sphingobacteriales":0.0,"k__Bacteria;p__Bacteroidetes;c__[Saprospirae];o__[Saprospirales]":0.0,"k__Bacteria;p__Caldiserica;c__OP5;o__WCHB1-02":0.0,"k__Bacteria;p__Caldiserica;c__TTA-B1;o__":0.0,"k__Bacteria;p__Chlorobi;c__SJA-28;o__":0.0,"k__Bacteria;p__Chloroflexi;c__;o__":0.0,"k__Bacteria;p__Chloroflexi;c__Anaerolineae;o__":0.0,"k__Bacteria;p__Chloroflexi;c__Anaerolineae;o__Anaerolineales":0.0,"k__Bacteria;p__Chloroflexi;c__Anaerolineae;o__Caldilineales":0.0,"k__Bacteria;p__Chloroflexi;c__Anaerolineae;o__OPB11":0.0,"k__Bacteria;p__Chloroflexi;c__Anaerolineae;o__SHA-20":0.0,"k__Bacteria;p__Chloroflexi;c__Anaerolineae;o__WCHB1-50":0.0,"k__Bacteria;p__Chloroflexi;c__Ellin6529;o__":0.0,"k__Bacteria;p__Chloroflexi;c__SHA-26;o__":0.0,"k__Bacteria;p__Cyanobacteria;c__4C0d-2;o__MLE1-12":0.0,"k__Bacteria;p__Cyanobacteria;c__Chloroplast;o__Chlorophyta":0.0,"k__Bacteria;p__EM3;c__;o__":0.0,"k__Bacteria;p__Fibrobacteres;c__TG3;o__TG3-1":105.0,"k__Bacteria;p__Firmicutes;c__Bacilli;o__Bacillales":0.0,"k__Bacteria;p__Firmicutes;c__Bacilli;o__Lactobacillales":43.0,"k__Bacteria;p__Firmicutes;c__Bacilli;o__Turicibacterales":10.0,"k__Bacteria;p__Firmicutes;c__Clostridia;__":0.0,"k__Bacteria;p__Firmicutes;c__Clostridia;o__":34.0,"k__Bacteria;p__Firmicutes;c__Clostridia;o__BSA2B-08":33.0,"k__Bacteria;p__Firmicutes;c__Clostridia;o__Clostridiales":1318.0,"k__Bacteria;p__Firmicutes;c__Clostridia;o__Halanaerobiales":26.0,"k__Bacteria;p__Firmicutes;c__Clostridia;o__MBA08":5144.0,"k__Bacteria;p__Firmicutes;c__Clostridia;o__Natranaerobiales":37.0,"k__Bacteria;p__Firmicutes;c__Clostridia;o__OPB54":115.0,"k__Bacteria;p__Firmicutes;c__Clostridia;o__SHA-98":1159.0,"k__Bacteria;p__Firmicutes;c__Clostridia;o__Thermoanaerobacterales":242.0,"k__Bacteria;p__Firmicutes;c__Erysipelotrichi;o__Erysipelotrichales":0.0,"k__Bacteria;p__Firmicutes;c__OPB54;o__":146.0,"k__Bacteria;p__NKB19;__;__":0.0,"k__Bacteria;p__NKB19;c__TSBW08;o__":0.0,"k__Bacteria;p__OD1;c__;o__":0.0,"k__Bacteria;p__OD1;c__ABY1;o__":0.0,"k__Bacteria;p__OP1;c__OPB14;o__":0.0,"k__Bacteria;p__OP8;c__OP8_1;__":0.0,"k__Bacteria;p__OP8;c__OP8_1;o__":0.0,"k__Bacteria;p__OP9;c__JS1;o__BA021":0.0,"k__Bacteria;p__OP9;c__OPB46;o__OPB72":54.0,"k__Bacteria;p__OP9;c__OPB46;o__SHA-1":0.0,"k__Bacteria;p__Proteobacteria;__;__":0.0,"k__Bacteria;p__Proteobacteria;c__Alphaproteobacteria;o__Caulobacterales":0.0,"k__Bacteria;p__Proteobacteria;c__Alphaproteobacteria;o__Rhizobiales":0.0,"k__Bacteria;p__Proteobacteria;c__Alphaproteobacteria;o__Rhodobacterales":0.0,"k__Bacteria;p__Proteobacteria;c__Alphaproteobacteria;o__Rhodospirillales":0.0,"k__Bacteria;p__Proteobacteria;c__Alphaproteobacteria;o__Sphingomonadales":0.0,"k__Bacteria;p__Proteobacteria;c__Betaproteobacteria;__":0.0,"k__Bacteria;p__Proteobacteria;c__Betaproteobacteria;o__Burkholderiales":0.0,"k__Bacteria;p__Proteobacteria;c__Betaproteobacteria;o__Rhodocyclales":0.0,"k__Bacteria;p__Proteobacteria;c__Betaproteobacteria;o__SC-I-84":0.0,"k__Bacteria;p__Proteobacteria;c__Deltaproteobacteria;o__GW-28":0.0,"k__Bacteria;p__Proteobacteria;c__Deltaproteobacteria;o__Myxococcales":0.0,"k__Bacteria;p__Proteobacteria;c__Deltaproteobacteria;o__Syntrophobacterales":0.0,"k__Bacteria;p__Proteobacteria;c__Epsilonproteobacteria;o__Campylobacterales":0.0,"k__Bacteria;p__Proteobacteria;c__Gammaproteobacteria;o__Enterobacteriales":0.0,"k__Bacteria;p__Proteobacteria;c__Gammaproteobacteria;o__Pseudomonadales":0.0,"k__Bacteria;p__Proteobacteria;c__Gammaproteobacteria;o__Xanthomonadales":0.0,"k__Bacteria;p__SAR406;c__AB16;o__noFP_H7":0.0,"k__Bacteria;p__SR1;c__;o__":0.0,"k__Bacteria;p__Spirochaetes;c__Spirochaetes;o__M2PT2-76":0.0,"k__Bacteria;p__Spirochaetes;c__Spirochaetes;o__Spirochaetales":0.0,"k__Bacteria;p__Spirochaetes;c__[Brachyspirae];o__[Brachyspirales]":0.0,"k__Bacteria;p__Spirochaetes;c__[Leptospirae];o__[Leptospirales]":0.0,"k__Bacteria;p__Synergistetes;c__Synergistia;o__Synergistales":128.0,"k__Bacteria;p__TA06;c__;o__":0.0,"k__Bacteria;p__TM6;c__SJA-4;o__S1198":0.0,"k__Bacteria;p__TM7;c__TM7-1;o__":0.0,"k__Bacteria;p__TM7;c__TM7-3;__":0.0,"k__Bacteria;p__TM7;c__TM7-3;o__":0.0,"k__Bacteria;p__TM7;c__TM7-3;o__I025":0.0,"k__Bacteria;p__Tenericutes;c__Mollicutes;o__RF39":0.0,"k__Bacteria;p__Tenericutes;c__RF3;o__ML615J-28":376.0,"k__Bacteria;p__Thermotogae;c__Thermotogae;o__Thermotogales":536.0,"k__Bacteria;p__Verrucomicrobia;c__Verruco-5;o__LD1-PB3":0.0,"k__Bacteria;p__Verrucomicrobia;c__[Pedosphaerae];o__[Pedosphaerales]":0.0,"k__Bacteria;p__WS6;c__SC72;o__A-2AF":0.0,"k__Bacteria;p__WWE1;c__[Cloacamonae];o__[Cloacamonales]":10.0,"k__Bacteria;p__[Thermi];c__Deinococci;o__Deinococcales":0.0,"Process Day":"15","arsenite add.":"As30","plant no.":"#01","plant type":"Biogas"},{"index":"U341F-U806R-P1-NW4-1-36-89","k__Archaea;p__Euryarchaeota;c__Methanobacteria;o__Methanobacteriales":20.0,"k__Archaea;p__Euryarchaeota;c__Methanomicrobia;o__Methanomicrobiales":246.0,"k__Archaea;p__Euryarchaeota;c__Methanomicrobia;o__Methanosarcinales":23.0,"k__Archaea;p__Euryarchaeota;c__Thermoplasmata;o__E2":6.0,"k__Bacteria;__;__;__":61.0,"k__Bacteria;p__;c__;o__":0.0,"k__Bacteria;p__Acidobacteria;c__BPC102;o__B110":0.0,"k__Bacteria;p__Acidobacteria;c__BPC102;o__MVS-40":0.0,"k__Bacteria;p__Acidobacteria;c__Sva0725;o__Sva0725":0.0,"k__Bacteria;p__Acidobacteria;c__[Chloracidobacteria];o__RB41":0.0,"k__Bacteria;p__Actinobacteria;c__;o__":0.0,"k__Bacteria;p__Actinobacteria;c__Acidimicrobiia;o__Acidimicrobiales":0.0,"k__Bacteria;p__Actinobacteria;c__Actinobacteria;o__Actinomycetales":41.0,"k__Bacteria;p__Actinobacteria;c__Actinobacteria;o__WCHB1-81":0.0,"k__Bacteria;p__Actinobacteria;c__Thermoleophilia;o__Gaiellales":0.0,"k__Bacteria;p__Actinobacteria;c__Thermoleophilia;o__Solirubrobacterales":0.0,"k__Bacteria;p__Bacteroidetes;__;__":1457.0,"k__Bacteria;p__Bacteroidetes;c__Bacteroidia;o__Bacteroidales":1048.0,"k__Bacteria;p__Bacteroidetes;c__Cytophagia;o__Cytophagales":191.0,"k__Bacteria;p__Bacteroidetes;c__Flavobacteriia;o__Flavobacteriales":0.0,"k__Bacteria;p__Bacteroidetes;c__Sphingobacteriia;o__Sphingobacteriales":0.0,"k__Bacteria;p__Bacteroidetes;c__[Saprospirae];o__[Saprospirales]":0.0,"k__Bacteria;p__Caldiserica;c__OP5;o__WCHB1-02":0.0,"k__Bacteria;p__Caldiserica;c__TTA-B1;o__":0.0,"k__Bacteria;p__Chlorobi;c__SJA-28;o__":0.0,"k__Bacteria;p__Chloroflexi;c__;o__":0.0,"k__Bacteria;p__Chloroflexi;c__Anaerolineae;o__":0.0,"k__Bacteria;p__Chloroflexi;c__Anaerolineae;o__Anaerolineales":0.0,"k__Bacteria;p__Chloroflexi;c__Anaerolineae;o__Caldilineales":0.0,"k__Bacteria;p__Chloroflexi;c__Anaerolineae;o__OPB11":0.0,"k__Bacteria;p__Chloroflexi;c__Anaerolineae;o__SHA-20":0.0,"k__Bacteria;p__Chloroflexi;c__Anaerolineae;o__WCHB1-50":0.0,"k__Bacteria;p__Chloroflexi;c__Ellin6529;o__":0.0,"k__Bacteria;p__Chloroflexi;c__SHA-26;o__":0.0,"k__Bacteria;p__Cyanobacteria;c__4C0d-2;o__MLE1-12":0.0,"k__Bacteria;p__Cyanobacteria;c__Chloroplast;o__Chlorophyta":0.0,"k__Bacteria;p__EM3;c__;o__":0.0,"k__Bacteria;p__Fibrobacteres;c__TG3;o__TG3-1":64.0,"k__Bacteria;p__Firmicutes;c__Bacilli;o__Bacillales":7.0,"k__Bacteria;p__Firmicutes;c__Bacilli;o__Lactobacillales":35.0,"k__Bacteria;p__Firmicutes;c__Bacilli;o__Turicibacterales":0.0,"k__Bacteria;p__Firmicutes;c__Clostridia;__":5.0,"k__Bacteria;p__Firmicutes;c__Clostridia;o__":30.0,"k__Bacteria;p__Firmicutes;c__Clostridia;o__BSA2B-08":30.0,"k__Bacteria;p__Firmicutes;c__Clostridia;o__Clostridiales":1376.0,"k__Bacteria;p__Firmicutes;c__Clostridia;o__Halanaerobiales":14.0,"k__Bacteria;p__Firmicutes;c__Clostridia;o__MBA08":7276.0,"k__Bacteria;p__Firmicutes;c__Clostridia;o__Natranaerobiales":76.0,"k__Bacteria;p__Firmicutes;c__Clostridia;o__OPB54":64.0,"k__Bacteria;p__Firmicutes;c__Clostridia;o__SHA-98":1234.0,"k__Bacteria;p__Firmicutes;c__Clostridia;o__Thermoanaerobacterales":233.0,"k__Bacteria;p__Firmicutes;c__Erysipelotrichi;o__Erysipelotrichales":0.0,"k__Bacteria;p__Firmicutes;c__OPB54;o__":141.0,"k__Bacteria;p__NKB19;__;__":0.0,"k__Bacteria;p__NKB19;c__TSBW08;o__":0.0,"k__Bacteria;p__OD1;c__;o__":0.0,"k__Bacteria;p__OD1;c__ABY1;o__":0.0,"k__Bacteria;p__OP1;c__OPB14;o__":0.0,"k__Bacteria;p__OP8;c__OP8_1;__":0.0,"k__Bacteria;p__OP8;c__OP8_1;o__":0.0,"k__Bacteria;p__OP9;c__JS1;o__BA021":0.0,"k__Bacteria;p__OP9;c__OPB46;o__OPB72":43.0,"k__Bacteria;p__OP9;c__OPB46;o__SHA-1":0.0,"k__Bacteria;p__Proteobacteria;__;__":0.0,"k__Bacteria;p__Proteobacteria;c__Alphaproteobacteria;o__Caulobacterales":0.0,"k__Bacteria;p__Proteobacteria;c__Alphaproteobacteria;o__Rhizobiales":0.0,"k__Bacteria;p__Proteobacteria;c__Alphaproteobacteria;o__Rhodobacterales":0.0,"k__Bacteria;p__Proteobacteria;c__Alphaproteobacteria;o__Rhodospirillales":0.0,"k__Bacteria;p__Proteobacteria;c__Alphaproteobacteria;o__Sphingomonadales":0.0,"k__Bacteria;p__Proteobacteria;c__Betaproteobacteria;__":0.0,"k__Bacteria;p__Proteobacteria;c__Betaproteobacteria;o__Burkholderiales":0.0,"k__Bacteria;p__Proteobacteria;c__Betaproteobacteria;o__Rhodocyclales":0.0,"k__Bacteria;p__Proteobacteria;c__Betaproteobacteria;o__SC-I-84":0.0,"k__Bacteria;p__Proteobacteria;c__Deltaproteobacteria;o__GW-28":0.0,"k__Bacteria;p__Proteobacteria;c__Deltaproteobacteria;o__Myxococcales":0.0,"k__Bacteria;p__Proteobacteria;c__Deltaproteobacteria;o__Syntrophobacterales":0.0,"k__Bacteria;p__Proteobacteria;c__Epsilonproteobacteria;o__Campylobacterales":0.0,"k__Bacteria;p__Proteobacteria;c__Gammaproteobacteria;o__Enterobacteriales":0.0,"k__Bacteria;p__Proteobacteria;c__Gammaproteobacteria;o__Pseudomonadales":0.0,"k__Bacteria;p__Proteobacteria;c__Gammaproteobacteria;o__Xanthomonadales":0.0,"k__Bacteria;p__SAR406;c__AB16;o__noFP_H7":0.0,"k__Bacteria;p__SR1;c__;o__":0.0,"k__Bacteria;p__Spirochaetes;c__Spirochaetes;o__M2PT2-76":0.0,"k__Bacteria;p__Spirochaetes;c__Spirochaetes;o__Spirochaetales":4.0,"k__Bacteria;p__Spirochaetes;c__[Brachyspirae];o__[Brachyspirales]":0.0,"k__Bacteria;p__Spirochaetes;c__[Leptospirae];o__[Leptospirales]":0.0,"k__Bacteria;p__Synergistetes;c__Synergistia;o__Synergistales":188.0,"k__Bacteria;p__TA06;c__;o__":0.0,"k__Bacteria;p__TM6;c__SJA-4;o__S1198":0.0,"k__Bacteria;p__TM7;c__TM7-1;o__":0.0,"k__Bacteria;p__TM7;c__TM7-3;__":0.0,"k__Bacteria;p__TM7;c__TM7-3;o__":0.0,"k__Bacteria;p__TM7;c__TM7-3;o__I025":0.0,"k__Bacteria;p__Tenericutes;c__Mollicutes;o__RF39":0.0,"k__Bacteria;p__Tenericutes;c__RF3;o__ML615J-28":333.0,"k__Bacteria;p__Thermotogae;c__Thermotogae;o__Thermotogales":1008.0,"k__Bacteria;p__Verrucomicrobia;c__Verruco-5;o__LD1-PB3":0.0,"k__Bacteria;p__Verrucomicrobia;c__[Pedosphaerae];o__[Pedosphaerales]":0.0,"k__Bacteria;p__WS6;c__SC72;o__A-2AF":0.0,"k__Bacteria;p__WWE1;c__[Cloacamonae];o__[Cloacamonales]":0.0,"k__Bacteria;p__[Thermi];c__Deinococci;o__Deinococcales":0.0,"Process Day":"15","arsenite add.":"As30","plant no.":"#01","plant type":"Biogas"},{"index":"U341F-U806R-P1-NW4-1-38-94","k__Archaea;p__Euryarchaeota;c__Methanobacteria;o__Methanobacteriales":0.0,"k__Archaea;p__Euryarchaeota;c__Methanomicrobia;o__Methanomicrobiales":75.0,"k__Archaea;p__Euryarchaeota;c__Methanomicrobia;o__Methanosarcinales":7.0,"k__Archaea;p__Euryarchaeota;c__Thermoplasmata;o__E2":0.0,"k__Bacteria;__;__;__":0.0,"k__Bacteria;p__;c__;o__":0.0,"k__Bacteria;p__Acidobacteria;c__BPC102;o__B110":0.0,"k__Bacteria;p__Acidobacteria;c__BPC102;o__MVS-40":0.0,"k__Bacteria;p__Acidobacteria;c__Sva0725;o__Sva0725":0.0,"k__Bacteria;p__Acidobacteria;c__[Chloracidobacteria];o__RB41":0.0,"k__Bacteria;p__Actinobacteria;c__;o__":0.0,"k__Bacteria;p__Actinobacteria;c__Acidimicrobiia;o__Acidimicrobiales":0.0,"k__Bacteria;p__Actinobacteria;c__Actinobacteria;o__Actinomycetales":10.0,"k__Bacteria;p__Actinobacteria;c__Actinobacteria;o__WCHB1-81":0.0,"k__Bacteria;p__Actinobacteria;c__Thermoleophilia;o__Gaiellales":0.0,"k__Bacteria;p__Actinobacteria;c__Thermoleophilia;o__Solirubrobacterales":0.0,"k__Bacteria;p__Bacteroidetes;__;__":657.0,"k__Bacteria;p__Bacteroidetes;c__Bacteroidia;o__Bacteroidales":469.0,"k__Bacteria;p__Bacteroidetes;c__Cytophagia;o__Cytophagales":92.0,"k__Bacteria;p__Bacteroidetes;c__Flavobacteriia;o__Flavobacteriales":0.0,"k__Bacteria;p__Bacteroidetes;c__Sphingobacteriia;o__Sphingobacteriales":0.0,"k__Bacteria;p__Bacteroidetes;c__[Saprospirae];o__[Saprospirales]":0.0,"k__Bacteria;p__Caldiserica;c__OP5;o__WCHB1-02":0.0,"k__Bacteria;p__Caldiserica;c__TTA-B1;o__":0.0,"k__Bacteria;p__Chlorobi;c__SJA-28;o__":0.0,"k__Bacteria;p__Chloroflexi;c__;o__":0.0,"k__Bacteria;p__Chloroflexi;c__Anaerolineae;o__":0.0,"k__Bacteria;p__Chloroflexi;c__Anaerolineae;o__Anaerolineales":0.0,"k__Bacteria;p__Chloroflexi;c__Anaerolineae;o__Caldilineales":0.0,"k__Bacteria;p__Chloroflexi;c__Anaerolineae;o__OPB11":0.0,"k__Bacteria;p__Chloroflexi;c__Anaerolineae;o__SHA-20":0.0,"k__Bacteria;p__Chloroflexi;c__Anaerolineae;o__WCHB1-50":0.0,"k__Bacteria;p__Chloroflexi;c__Ellin6529;o__":0.0,"k__Bacteria;p__Chloroflexi;c__SHA-26;o__":0.0,"k__Bacteria;p__Cyanobacteria;c__4C0d-2;o__MLE1-12":0.0,"k__Bacteria;p__Cyanobacteria;c__Chloroplast;o__Chlorophyta":0.0,"k__Bacteria;p__EM3;c__;o__":0.0,"k__Bacteria;p__Fibrobacteres;c__TG3;o__TG3-1":12.0,"k__Bacteria;p__Firmicutes;c__Bacilli;o__Bacillales":9.0,"k__Bacteria;p__Firmicutes;c__Bacilli;o__Lactobacillales":38.0,"k__Bacteria;p__Firmicutes;c__Bacilli;o__Turicibacterales":0.0,"k__Bacteria;p__Firmicutes;c__Clostridia;__":0.0,"k__Bacteria;p__Firmicutes;c__Clostridia;o__":0.0,"k__Bacteria;p__Firmicutes;c__Clostridia;o__BSA2B-08":0.0,"k__Bacteria;p__Firmicutes;c__Clostridia;o__Clostridiales":628.0,"k__Bacteria;p__Firmicutes;c__Clostridia;o__Halanaerobiales":17.0,"k__Bacteria;p__Firmicutes;c__Clostridia;o__MBA08":2149.0,"k__Bacteria;p__Firmicutes;c__Clostridia;o__Natranaerobiales":15.0,"k__Bacteria;p__Firmicutes;c__Clostridia;o__OPB54":23.0,"k__Bacteria;p__Firmicutes;c__Clostridia;o__SHA-98":332.0,"k__Bacteria;p__Firmicutes;c__Clostridia;o__Thermoanaerobacterales":105.0,"k__Bacteria;p__Firmicutes;c__Erysipelotrichi;o__Erysipelotrichales":0.0,"k__Bacteria;p__Firmicutes;c__OPB54;o__":45.0,"k__Bacteria;p__NKB19;__;__":0.0,"k__Bacteria;p__NKB19;c__TSBW08;o__":0.0,"k__Bacteria;p__OD1;c__;o__":0.0,"k__Bacteria;p__OD1;c__ABY1;o__":0.0,"k__Bacteria;p__OP1;c__OPB14;o__":0.0,"k__Bacteria;p__OP8;c__OP8_1;__":0.0,"k__Bacteria;p__OP8;c__OP8_1;o__":0.0,"k__Bacteria;p__OP9;c__JS1;o__BA021":0.0,"k__Bacteria;p__OP9;c__OPB46;o__OPB72":37.0,"k__Bacteria;p__OP9;c__OPB46;o__SHA-1":0.0,"k__Bacteria;p__Proteobacteria;__;__":0.0,"k__Bacteria;p__Proteobacteria;c__Alphaproteobacteria;o__Caulobacterales":0.0,"k__Bacteria;p__Proteobacteria;c__Alphaproteobacteria;o__Rhizobiales":9.0,"k__Bacteria;p__Proteobacteria;c__Alphaproteobacteria;o__Rhodobacterales":0.0,"k__Bacteria;p__Proteobacteria;c__Alphaproteobacteria;o__Rhodospirillales":0.0,"k__Bacteria;p__Proteobacteria;c__Alphaproteobacteria;o__Sphingomonadales":0.0,"k__Bacteria;p__Proteobacteria;c__Betaproteobacteria;__":0.0,"k__Bacteria;p__Proteobacteria;c__Betaproteobacteria;o__Burkholderiales":0.0,"k__Bacteria;p__Proteobacteria;c__Betaproteobacteria;o__Rhodocyclales":0.0,"k__Bacteria;p__Proteobacteria;c__Betaproteobacteria;o__SC-I-84":0.0,"k__Bacteria;p__Proteobacteria;c__Deltaproteobacteria;o__GW-28":0.0,"k__Bacteria;p__Proteobacteria;c__Deltaproteobacteria;o__Myxococcales":0.0,"k__Bacteria;p__Proteobacteria;c__Deltaproteobacteria;o__Syntrophobacterales":0.0,"k__Bacteria;p__Proteobacteria;c__Epsilonproteobacteria;o__Campylobacterales":0.0,"k__Bacteria;p__Proteobacteria;c__Gammaproteobacteria;o__Enterobacteriales":0.0,"k__Bacteria;p__Proteobacteria;c__Gammaproteobacteria;o__Pseudomonadales":0.0,"k__Bacteria;p__Proteobacteria;c__Gammaproteobacteria;o__Xanthomonadales":0.0,"k__Bacteria;p__SAR406;c__AB16;o__noFP_H7":0.0,"k__Bacteria;p__SR1;c__;o__":0.0,"k__Bacteria;p__Spirochaetes;c__Spirochaetes;o__M2PT2-76":0.0,"k__Bacteria;p__Spirochaetes;c__Spirochaetes;o__Spirochaetales":0.0,"k__Bacteria;p__Spirochaetes;c__[Brachyspirae];o__[Brachyspirales]":0.0,"k__Bacteria;p__Spirochaetes;c__[Leptospirae];o__[Leptospirales]":0.0,"k__Bacteria;p__Synergistetes;c__Synergistia;o__Synergistales":68.0,"k__Bacteria;p__TA06;c__;o__":0.0,"k__Bacteria;p__TM6;c__SJA-4;o__S1198":0.0,"k__Bacteria;p__TM7;c__TM7-1;o__":0.0,"k__Bacteria;p__TM7;c__TM7-3;__":0.0,"k__Bacteria;p__TM7;c__TM7-3;o__":0.0,"k__Bacteria;p__TM7;c__TM7-3;o__I025":0.0,"k__Bacteria;p__Tenericutes;c__Mollicutes;o__RF39":0.0,"k__Bacteria;p__Tenericutes;c__RF3;o__ML615J-28":127.0,"k__Bacteria;p__Thermotogae;c__Thermotogae;o__Thermotogales":544.0,"k__Bacteria;p__Verrucomicrobia;c__Verruco-5;o__LD1-PB3":0.0,"k__Bacteria;p__Verrucomicrobia;c__[Pedosphaerae];o__[Pedosphaerales]":0.0,"k__Bacteria;p__WS6;c__SC72;o__A-2AF":0.0,"k__Bacteria;p__WWE1;c__[Cloacamonae];o__[Cloacamonales]":0.0,"k__Bacteria;p__[Thermi];c__Deinococci;o__Deinococcales":0.0,"Process Day":"15","arsenite add.":"As60","plant no.":"#01","plant type":"Biogas"},{"index":"U341F-U806R-P1-NW4-1-38-95","k__Archaea;p__Euryarchaeota;c__Methanobacteria;o__Methanobacteriales":10.0,"k__Archaea;p__Euryarchaeota;c__Methanomicrobia;o__Methanomicrobiales":159.0,"k__Archaea;p__Euryarchaeota;c__Methanomicrobia;o__Methanosarcinales":19.0,"k__Archaea;p__Euryarchaeota;c__Thermoplasmata;o__E2":0.0,"k__Bacteria;__;__;__":2.0,"k__Bacteria;p__;c__;o__":0.0,"k__Bacteria;p__Acidobacteria;c__BPC102;o__B110":0.0,"k__Bacteria;p__Acidobacteria;c__BPC102;o__MVS-40":0.0,"k__Bacteria;p__Acidobacteria;c__Sva0725;o__Sva0725":0.0,"k__Bacteria;p__Acidobacteria;c__[Chloracidobacteria];o__RB41":0.0,"k__Bacteria;p__Actinobacteria;c__;o__":0.0,"k__Bacteria;p__Actinobacteria;c__Acidimicrobiia;o__Acidimicrobiales":0.0,"k__Bacteria;p__Actinobacteria;c__Actinobacteria;o__Actinomycetales":0.0,"k__Bacteria;p__Actinobacteria;c__Actinobacteria;o__WCHB1-81":0.0,"k__Bacteria;p__Actinobacteria;c__Thermoleophilia;o__Gaiellales":0.0,"k__Bacteria;p__Actinobacteria;c__Thermoleophilia;o__Solirubrobacterales":0.0,"k__Bacteria;p__Bacteroidetes;__;__":1279.0,"k__Bacteria;p__Bacteroidetes;c__Bacteroidia;o__Bacteroidales":1128.0,"k__Bacteria;p__Bacteroidetes;c__Cytophagia;o__Cytophagales":159.0,"k__Bacteria;p__Bacteroidetes;c__Flavobacteriia;o__Flavobacteriales":0.0,"k__Bacteria;p__Bacteroidetes;c__Sphingobacteriia;o__Sphingobacteriales":0.0,"k__Bacteria;p__Bacteroidetes;c__[Saprospirae];o__[Saprospirales]":0.0,"k__Bacteria;p__Caldiserica;c__OP5;o__WCHB1-02":0.0,"k__Bacteria;p__Caldiserica;c__TTA-B1;o__":0.0,"k__Bacteria;p__Chlorobi;c__SJA-28;o__":0.0,"k__Bacteria;p__Chloroflexi;c__;o__":0.0,"k__Bacteria;p__Chloroflexi;c__Anaerolineae;o__":0.0,"k__Bacteria;p__Chloroflexi;c__Anaerolineae;o__Anaerolineales":0.0,"k__Bacteria;p__Chloroflexi;c__Anaerolineae;o__Caldilineales":0.0,"k__Bacteria;p__Chloroflexi;c__Anaerolineae;o__OPB11":0.0,"k__Bacteria;p__Chloroflexi;c__Anaerolineae;o__SHA-20":0.0,"k__Bacteria;p__Chloroflexi;c__Anaerolineae;o__WCHB1-50":0.0,"k__Bacteria;p__Chloroflexi;c__Ellin6529;o__":0.0,"k__Bacteria;p__Chloroflexi;c__SHA-26;o__":0.0,"k__Bacteria;p__Cyanobacteria;c__4C0d-2;o__MLE1-12":0.0,"k__Bacteria;p__Cyanobacteria;c__Chloroplast;o__Chlorophyta":0.0,"k__Bacteria;p__EM3;c__;o__":0.0,"k__Bacteria;p__Fibrobacteres;c__TG3;o__TG3-1":24.0,"k__Bacteria;p__Firmicutes;c__Bacilli;o__Bacillales":0.0,"k__Bacteria;p__Firmicutes;c__Bacilli;o__Lactobacillales":28.0,"k__Bacteria;p__Firmicutes;c__Bacilli;o__Turicibacterales":0.0,"k__Bacteria;p__Firmicutes;c__Clostridia;__":0.0,"k__Bacteria;p__Firmicutes;c__Clostridia;o__":0.0,"k__Bacteria;p__Firmicutes;c__Clostridia;o__BSA2B-08":0.0,"k__Bacteria;p__Firmicutes;c__Clostridia;o__Clostridiales":997.0,"k__Bacteria;p__Firmicutes;c__Clostridia;o__Halanaerobiales":26.0,"k__Bacteria;p__Firmicutes;c__Clostridia;o__MBA08":2307.0,"k__Bacteria;p__Firmicutes;c__Clostridia;o__Natranaerobiales":31.0,"k__Bacteria;p__Firmicutes;c__Clostridia;o__OPB54":0.0,"k__Bacteria;p__Firmicutes;c__Clostridia;o__SHA-98":528.0,"k__Bacteria;p__Firmicutes;c__Clostridia;o__Thermoanaerobacterales":120.0,"k__Bacteria;p__Firmicutes;c__Erysipelotrichi;o__Erysipelotrichales":0.0,"k__Bacteria;p__Firmicutes;c__OPB54;o__":79.0,"k__Bacteria;p__NKB19;__;__":0.0,"k__Bacteria;p__NKB19;c__TSBW08;o__":0.0,"k__Bacteria;p__OD1;c__;o__":0.0,"k__Bacteria;p__OD1;c__ABY1;o__":0.0,"k__Bacteria;p__OP1;c__OPB14;o__":0.0,"k__Bacteria;p__OP8;c__OP8_1;__":0.0,"k__Bacteria;p__OP8;c__OP8_1;o__":0.0,"k__Bacteria;p__OP9;c__JS1;o__BA021":0.0,"k__Bacteria;p__OP9;c__OPB46;o__OPB72":52.0,"k__Bacteria;p__OP9;c__OPB46;o__SHA-1":0.0,"k__Bacteria;p__Proteobacteria;__;__":0.0,"k__Bacteria;p__Proteobacteria;c__Alphaproteobacteria;o__Caulobacterales":0.0,"k__Bacteria;p__Proteobacteria;c__Alphaproteobacteria;o__Rhizobiales":0.0,"k__Bacteria;p__Proteobacteria;c__Alphaproteobacteria;o__Rhodobacterales":0.0,"k__Bacteria;p__Proteobacteria;c__Alphaproteobacteria;o__Rhodospirillales":0.0,"k__Bacteria;p__Proteobacteria;c__Alphaproteobacteria;o__Sphingomonadales":0.0,"k__Bacteria;p__Proteobacteria;c__Betaproteobacteria;__":0.0,"k__Bacteria;p__Proteobacteria;c__Betaproteobacteria;o__Burkholderiales":0.0,"k__Bacteria;p__Proteobacteria;c__Betaproteobacteria;o__Rhodocyclales":0.0,"k__Bacteria;p__Proteobacteria;c__Betaproteobacteria;o__SC-I-84":0.0,"k__Bacteria;p__Proteobacteria;c__Deltaproteobacteria;o__GW-28":0.0,"k__Bacteria;p__Proteobacteria;c__Deltaproteobacteria;o__Myxococcales":0.0,"k__Bacteria;p__Proteobacteria;c__Deltaproteobacteria;o__Syntrophobacterales":0.0,"k__Bacteria;p__Proteobacteria;c__Epsilonproteobacteria;o__Campylobacterales":0.0,"k__Bacteria;p__Proteobacteria;c__Gammaproteobacteria;o__Enterobacteriales":0.0,"k__Bacteria;p__Proteobacteria;c__Gammaproteobacteria;o__Pseudomonadales":0.0,"k__Bacteria;p__Proteobacteria;c__Gammaproteobacteria;o__Xanthomonadales":0.0,"k__Bacteria;p__SAR406;c__AB16;o__noFP_H7":0.0,"k__Bacteria;p__SR1;c__;o__":0.0,"k__Bacteria;p__Spirochaetes;c__Spirochaetes;o__M2PT2-76":0.0,"k__Bacteria;p__Spirochaetes;c__Spirochaetes;o__Spirochaetales":0.0,"k__Bacteria;p__Spirochaetes;c__[Brachyspirae];o__[Brachyspirales]":0.0,"k__Bacteria;p__Spirochaetes;c__[Leptospirae];o__[Leptospirales]":0.0,"k__Bacteria;p__Synergistetes;c__Synergistia;o__Synergistales":96.0,"k__Bacteria;p__TA06;c__;o__":0.0,"k__Bacteria;p__TM6;c__SJA-4;o__S1198":0.0,"k__Bacteria;p__TM7;c__TM7-1;o__":0.0,"k__Bacteria;p__TM7;c__TM7-3;__":0.0,"k__Bacteria;p__TM7;c__TM7-3;o__":0.0,"k__Bacteria;p__TM7;c__TM7-3;o__I025":0.0,"k__Bacteria;p__Tenericutes;c__Mollicutes;o__RF39":0.0,"k__Bacteria;p__Tenericutes;c__RF3;o__ML615J-28":231.0,"k__Bacteria;p__Thermotogae;c__Thermotogae;o__Thermotogales":637.0,"k__Bacteria;p__Verrucomicrobia;c__Verruco-5;o__LD1-PB3":0.0,"k__Bacteria;p__Verrucomicrobia;c__[Pedosphaerae];o__[Pedosphaerales]":0.0,"k__Bacteria;p__WS6;c__SC72;o__A-2AF":0.0,"k__Bacteria;p__WWE1;c__[Cloacamonae];o__[Cloacamonales]":0.0,"k__Bacteria;p__[Thermi];c__Deinococci;o__Deinococcales":9.0,"Process Day":"15","arsenite add.":"As60","plant no.":"#01","plant type":"Biogas"}]);
