# Supplementary material for: Arsenic metabolism in technical biogas plants: possible consequences for resident microbiota and downstream units
Source: AMB Express. 2019 Nov 28;9:190. doi: 10.1186/s13568-019-0902-6 (PMC6882981; doi:10.1186/s13568-019-0902-6)
Supplement: Supplementary file 3 — Additional file 3. Additional electronic material (Qiime2 files). [file 13568_2019_902_MOESM3_ESM.qzv › efce6f8b-9ad8-46e7-a1e4-5087d1d706a9/data/level-5.csv]

index	k__Archaea;p__Euryarchaeota;c__Methanobacteria;o__Methanobacteriales;f__Methanobacteriaceae	k__Archaea;p__Euryarchaeota;c__Methanobacteria;o__Methanobacteriales;f__WSA2	k__Archaea;p__Euryarchaeota;c__Methanomicrobia;o__Methanomicrobiales;f__Methanomicrobiaceae	k__Archaea;p__Euryarchaeota;c__Methanomicrobia;o__Methanomicrobiales;f__Methanoregulaceae	k__Archaea;p__Euryarchaeota;c__Methanomicrobia;o__Methanomicrobiales;f__Methanospirillaceae	k__Archaea;p__Euryarchaeota;c__Methanomicrobia;o__Methanosarcinales;f__Methanosaetaceae	k__Archaea;p__Euryarchaeota;c__Methanomicrobia;o__Methanosarcinales;f__Methanosarcinaceae	k__Archaea;p__Euryarchaeota;c__Thermoplasmata;o__E2;f__[Methanomassiliicoccaceae]	k__Bacteria;__;__;__;__	k__Bacteria;p__;c__;o__;f__	k__Bacteria;p__Acidobacteria;c__BPC102;o__B110;f__	k__Bacteria;p__Acidobacteria;c__BPC102;o__MVS-40;f__	k__Bacteria;p__Acidobacteria;c__Sva0725;o__Sva0725;f__	k__Bacteria;p__Acidobacteria;c__[Chloracidobacteria];o__RB41;f__Ellin6075	k__Bacteria;p__Actinobacteria;c__;o__;f__	k__Bacteria;p__Actinobacteria;c__Acidimicrobiia;o__Acidimicrobiales;f__C111	k__Bacteria;p__Actinobacteria;c__Acidimicrobiia;o__Acidimicrobiales;f__Microthrixaceae	k__Bacteria;p__Actinobacteria;c__Actinobacteria;o__Actinomycetales;__	k__Bacteria;p__Actinobacteria;c__Actinobacteria;o__Actinomycetales;f__	k__Bacteria;p__Actinobacteria;c__Actinobacteria;o__Actinomycetales;f__Corynebacteriaceae	k__Bacteria;p__Actinobacteria;c__Actinobacteria;o__Actinomycetales;f__Intrasporangiaceae	k__Bacteria;p__Actinobacteria;c__Actinobacteria;o__Actinomycetales;f__Microbacteriaceae	k__Bacteria;p__Actinobacteria;c__Actinobacteria;o__Actinomycetales;f__Mycobacteriaceae	k__Bacteria;p__Actinobacteria;c__Actinobacteria;o__Actinomycetales;f__Nocardioidaceae	k__Bacteria;p__Actinobacteria;c__Actinobacteria;o__WCHB1-81;f__At425_EubF1	k__Bacteria;p__Actinobacteria;c__Thermoleophilia;o__Gaiellales;f__	k__Bacteria;p__Actinobacteria;c__Thermoleophilia;o__Solirubrobacterales;f__	k__Bacteria;p__Actinobacteria;c__Thermoleophilia;o__Solirubrobacterales;f__Patulibacteraceae	k__Bacteria;p__Bacteroidetes;__;__;__	k__Bacteria;p__Bacteroidetes;c__Bacteroidia;o__Bacteroidales;f__	k__Bacteria;p__Bacteroidetes;c__Bacteroidia;o__Bacteroidales;f__Bacteroidaceae	k__Bacteria;p__Bacteroidetes;c__Bacteroidia;o__Bacteroidales;f__Marinilabiaceae	k__Bacteria;p__Bacteroidetes;c__Bacteroidia;o__Bacteroidales;f__Porphyromonadaceae	k__Bacteria;p__Bacteroidetes;c__Bacteroidia;o__Bacteroidales;f__Rikenellaceae	k__Bacteria;p__Bacteroidetes;c__Cytophagia;o__Cytophagales;f__	k__Bacteria;p__Bacteroidetes;c__Flavobacteriia;o__Flavobacteriales;f__Cryomorphaceae	k__Bacteria;p__Bacteroidetes;c__Flavobacteriia;o__Flavobacteriales;f__Flavobacteriaceae	k__Bacteria;p__Bacteroidetes;c__Flavobacteriia;o__Flavobacteriales;f__[Weeksellaceae]	k__Bacteria;p__Bacteroidetes;c__Sphingobacteriia;o__Sphingobacteriales;f__	k__Bacteria;p__Bacteroidetes;c__[Saprospirae];o__[Saprospirales];f__Saprospiraceae	k__Bacteria;p__Caldiserica;c__OP5;o__WCHB1-02;f__SHBZ1169	k__Bacteria;p__Caldiserica;c__TTA-B1;o__;f__	k__Bacteria;p__Chlorobi;c__SJA-28;o__;f__	k__Bacteria;p__Chloroflexi;c__;o__;f__	k__Bacteria;p__Chloroflexi;c__Anaerolineae;o__;f__	k__Bacteria;p__Chloroflexi;c__Anaerolineae;o__Anaerolineales;f__Anaerolinaceae	k__Bacteria;p__Chloroflexi;c__Anaerolineae;o__Caldilineales;f__Caldilineaceae	k__Bacteria;p__Chloroflexi;c__Anaerolineae;o__OPB11;f__	k__Bacteria;p__Chloroflexi;c__Anaerolineae;o__SHA-20;f__
U341F-U806R-P1-NW4-1-14-40	0.0	25.0	0.0	62.0	33.0	442.0	0.0	0.0	23.0	5.0	0.0	0.0	26.0	0.0	13.0	31.0	32.0	0.0	19.0	0.0	190.0	0.0	0.0	0.0	9.0	0.0	0.0	0.0	85.0	1268.0	18.0	0.0	237.0	148.0	0.0	0.0	0.0	0.0	10.0	58.0	14.0	23.0	0.0	15.0	0.0	208.0	0.0	9.0	23.0
U341F-U806R-P1-NW4-1-14-41	4.0	47.0	0.0	85.0	57.0	1355.0	0.0	0.0	40.0	10.0	0.0	13.0	54.0	6.0	14.0	120.0	50.0	13.0	41.0	0.0	524.0	0.0	0.0	0.0	36.0	4.0	10.0	6.0	133.0	2702.0	16.0	3.0	391.0	345.0	0.0	12.0	18.0	0.0	0.0	113.0	66.0	71.0	33.0	0.0	0.0	546.0	50.0	19.0	29.0
U341F-U806R-P1-NW4-1-27-100	0.0	17.0	25.0	126.0	31.0	728.0	0.0	15.0	58.0	19.0	7.0	6.0	35.0	0.0	54.0	28.0	19.0	0.0	18.0	0.0	306.0	10.0	0.0	0.0	36.0	0.0	23.0	0.0	115.0	5766.0	8.0	0.0	178.0	4.0	0.0	0.0	0.0	6.0	0.0	0.0	136.0	187.0	0.0	0.0	0.0	1194.0	0.0	20.0	17.0
U341F-U806R-P1-NW4-1-29-104	0.0	0.0	13.0	84.0	33.0	150.0	0.0	10.0	171.0	51.0	0.0	6.0	134.0	0.0	93.0	72.0	0.0	0.0	82.0	0.0	469.0	0.0	27.0	21.0	24.0	17.0	46.0	0.0	321.0	4873.0	10.0	0.0	584.0	0.0	0.0	5.0	0.0	10.0	0.0	3.0	134.0	320.0	0.0	0.0	0.0	679.0	30.0	32.0	39.0
U341F-U806R-P1-NW4-1-31-108	0.0	0.0	15.0	139.0	31.0	72.0	0.0	0.0	22.0	0.0	0.0	0.0	16.0	0.0	15.0	25.0	13.0	0.0	40.0	0.0	191.0	13.0	0.0	0.0	10.0	9.0	18.0	0.0	80.0	3516.0	0.0	0.0	85.0	0.0	0.0	0.0	0.0	6.0	0.0	0.0	56.0	63.0	0.0	0.0	0.0	708.0	0.0	9.0	0.0
U341F-U806R-P1-NW4-1-31-109	0.0	0.0	12.0	66.0	19.0	129.0	0.0	0.0	18.0	13.0	0.0	0.0	18.0	0.0	14.0	24.0	13.0	0.0	0.0	0.0	195.0	0.0	0.0	0.0	18.0	9.0	17.0	0.0	58.0	3198.0	7.0	0.0	111.0	0.0	0.0	0.0	0.0	0.0	0.0	0.0	66.0	147.0	0.0	0.0	6.0	1060.0	14.0	0.0	0.0
U341F-U806R-P1-NW4-1-33-79	87.0	0.0	228.0	0.0	0.0	0.0	22.0	9.0	30.0	0.0	0.0	0.0	0.0	0.0	0.0	0.0	0.0	0.0	0.0	22.0	0.0	0.0	0.0	0.0	0.0	0.0	0.0	0.0	1934.0	34.0	12.0	54.0	1047.0	0.0	258.0	0.0	0.0	0.0	0.0	0.0	0.0	0.0	0.0	0.0	0.0	0.0	0.0	0.0	0.0
U341F-U806R-P1-NW4-1-33-80	52.0	0.0	111.0	0.0	0.0	0.0	14.0	0.0	16.0	0.0	0.0	0.0	0.0	0.0	0.0	0.0	0.0	0.0	0.0	14.0	0.0	0.0	0.0	0.0	0.0	0.0	0.0	0.0	1241.0	0.0	10.0	23.0	732.0	0.0	153.0	0.0	0.0	0.0	0.0	0.0	0.0	0.0	0.0	0.0	0.0	0.0	0.0	0.0	0.0
U341F-U806R-P1-NW4-1-34-82	27.0	0.0	82.0	0.0	0.0	0.0	8.0	0.0	28.0	0.0	0.0	0.0	0.0	0.0	0.0	0.0	0.0	0.0	0.0	0.0	0.0	0.0	0.0	0.0	0.0	0.0	0.0	0.0	492.0	40.0	206.0	37.0	321.0	0.0	0.0	0.0	0.0	0.0	0.0	0.0	0.0	0.0	0.0	0.0	0.0	0.0	0.0	0.0	0.0
U341F-U806R-P1-NW4-1-34-83	49.0	0.0	135.0	0.0	0.0	0.0	8.0	0.0	55.0	0.0	0.0	0.0	0.0	0.0	0.0	0.0	0.0	0.0	0.0	23.0	0.0	0.0	0.0	0.0	0.0	0.0	0.0	0.0	745.0	95.0	328.0	88.0	451.0	0.0	107.0	0.0	0.0	0.0	0.0	0.0	0.0	0.0	0.0	0.0	0.0	0.0	0.0	0.0	0.0
U341F-U806R-P1-NW4-1-36-88	20.0	0.0	121.0	0.0	0.0	0.0	24.0	8.0	56.0	0.0	0.0	0.0	0.0	0.0	0.0	0.0	0.0	0.0	0.0	0.0	0.0	0.0	0.0	0.0	0.0	0.0	0.0	0.0	903.0	116.0	114.0	117.0	479.0	0.0	109.0	0.0	0.0	0.0	0.0	0.0	0.0	0.0	0.0	0.0	0.0	0.0	0.0	0.0	0.0
U341F-U806R-P1-NW4-1-36-89	20.0	0.0	246.0	0.0	0.0	0.0	23.0	6.0	61.0	0.0	0.0	0.0	0.0	0.0	0.0	0.0	0.0	0.0	0.0	41.0	0.0	0.0	0.0	0.0	0.0	0.0	0.0	0.0	1457.0	87.0	172.0	83.0	706.0	0.0	191.0	0.0	0.0	0.0	0.0	0.0	0.0	0.0	0.0	0.0	0.0	0.0	0.0	0.0	0.0
U341F-U806R-P1-NW4-1-38-94	0.0	0.0	75.0	0.0	0.0	0.0	7.0	0.0	0.0	0.0	0.0	0.0	0.0	0.0	0.0	0.0	0.0	0.0	0.0	10.0	0.0	0.0	0.0	0.0	0.0	0.0	0.0	0.0	657.0	27.0	25.0	39.0	378.0	0.0	92.0	0.0	0.0	0.0	0.0	0.0	0.0	0.0	0.0	0.0	0.0	0.0	0.0	0.0	0.0
U341F-U806R-P1-NW4-1-38-95	10.0	0.0	159.0	0.0	0.0	0.0	19.0	0.0	2.0	0.0	0.0	0.0	0.0	0.0	0.0	0.0	0.0	0.0	0.0	0.0	0.0	0.0	0.0	0.0	0.0	0.0	0.0	0.0	1279.0	87.0	112.0	108.0	821.0	0.0	159.0	0.0	0.0	0.0	0.0	0.0	0.0	0.0	0.0	0.0	0.0	0.0	0.0	0.0	0.0
[truncated: 111 more columns]
