# Supplementary material for: Arsenic metabolism in technical biogas plants: possible consequences for resident microbiota and downstream units
Source: AMB Express. 2019 Nov 28;9:190. doi: 10.1186/s13568-019-0902-6 (PMC6882981; doi:10.1186/s13568-019-0902-6)
Supplement: Supplementary file 3 — Additional file 3. Additional electronic material (Qiime2 files). [file 13568_2019_902_MOESM3_ESM.qzv › efce6f8b-9ad8-46e7-a1e4-5087d1d706a9/data/level-6.csv]

index	k__Archaea;p__Euryarchaeota;c__Methanobacteria;o__Methanobacteriales;f__Methanobacteriaceae;g__Methanobacterium	k__Archaea;p__Euryarchaeota;c__Methanobacteria;o__Methanobacteriales;f__Methanobacteriaceae;g__Methanobrevibacter	k__Archaea;p__Euryarchaeota;c__Methanobacteria;o__Methanobacteriales;f__Methanobacteriaceae;g__Methanothermobacter	k__Archaea;p__Euryarchaeota;c__Methanobacteria;o__Methanobacteriales;f__WSA2;g__	k__Archaea;p__Euryarchaeota;c__Methanomicrobia;o__Methanomicrobiales;f__Methanomicrobiaceae;g__Methanoculleus	k__Archaea;p__Euryarchaeota;c__Methanomicrobia;o__Methanomicrobiales;f__Methanoregulaceae;g__Methanolinea	k__Archaea;p__Euryarchaeota;c__Methanomicrobia;o__Methanomicrobiales;f__Methanospirillaceae;g__Methanospirillum	k__Archaea;p__Euryarchaeota;c__Methanomicrobia;o__Methanosarcinales;f__Methanosaetaceae;g__Methanosaeta	k__Archaea;p__Euryarchaeota;c__Methanomicrobia;o__Methanosarcinales;f__Methanosarcinaceae;g__Methanosarcina	k__Archaea;p__Euryarchaeota;c__Thermoplasmata;o__E2;f__[Methanomassiliicoccaceae];g__	k__Archaea;p__Euryarchaeota;c__Thermoplasmata;o__E2;f__[Methanomassiliicoccaceae];g__Methanomassiliicoccus	k__Bacteria;__;__;__;__;__	k__Bacteria;p__;c__;o__;f__;g__	k__Bacteria;p__Acidobacteria;c__BPC102;o__B110;f__;g__	k__Bacteria;p__Acidobacteria;c__BPC102;o__MVS-40;f__;g__	k__Bacteria;p__Acidobacteria;c__Sva0725;o__Sva0725;f__;g__	k__Bacteria;p__Acidobacteria;c__[Chloracidobacteria];o__RB41;f__Ellin6075;g__	k__Bacteria;p__Actinobacteria;c__;o__;f__;g__	k__Bacteria;p__Actinobacteria;c__Acidimicrobiia;o__Acidimicrobiales;f__C111;g__	k__Bacteria;p__Actinobacteria;c__Acidimicrobiia;o__Acidimicrobiales;f__Microthrixaceae;g__Candidatus Microthrix	k__Bacteria;p__Actinobacteria;c__Actinobacteria;o__Actinomycetales;__;__	k__Bacteria;p__Actinobacteria;c__Actinobacteria;o__Actinomycetales;f__;g__	k__Bacteria;p__Actinobacteria;c__Actinobacteria;o__Actinomycetales;f__Corynebacteriaceae;g__Corynebacterium	k__Bacteria;p__Actinobacteria;c__Actinobacteria;o__Actinomycetales;f__Intrasporangiaceae;g__	k__Bacteria;p__Actinobacteria;c__Actinobacteria;o__Actinomycetales;f__Microbacteriaceae;__	k__Bacteria;p__Actinobacteria;c__Actinobacteria;o__Actinomycetales;f__Mycobacteriaceae;g__Mycobacterium	k__Bacteria;p__Actinobacteria;c__Actinobacteria;o__Actinomycetales;f__Nocardioidaceae;g__	k__Bacteria;p__Actinobacteria;c__Actinobacteria;o__Actinomycetales;f__Nocardioidaceae;g__Propionicimonas	k__Bacteria;p__Actinobacteria;c__Actinobacteria;o__WCHB1-81;f__At425_EubF1;g__	k__Bacteria;p__Actinobacteria;c__Thermoleophilia;o__Gaiellales;f__;g__	k__Bacteria;p__Actinobacteria;c__Thermoleophilia;o__Solirubrobacterales;f__;g__	k__Bacteria;p__Actinobacteria;c__Thermoleophilia;o__Solirubrobacterales;f__Patulibacteraceae;g__	k__Bacteria;p__Bacteroidetes;__;__;__;__	k__Bacteria;p__Bacteroidetes;c__Bacteroidia;o__Bacteroidales;f__;g__	k__Bacteria;p__Bacteroidetes;c__Bacteroidia;o__Bacteroidales;f__Bacteroidaceae;g__	k__Bacteria;p__Bacteroidetes;c__Bacteroidia;o__Bacteroidales;f__Marinilabiaceae;g__	k__Bacteria;p__Bacteroidetes;c__Bacteroidia;o__Bacteroidales;f__Porphyromonadaceae;g__	k__Bacteria;p__Bacteroidetes;c__Bacteroidia;o__Bacteroidales;f__Porphyromonadaceae;g__Paludibacter	k__Bacteria;p__Bacteroidetes;c__Bacteroidia;o__Bacteroidales;f__Rikenellaceae;g__Blvii28	k__Bacteria;p__Bacteroidetes;c__Cytophagia;o__Cytophagales;f__;g__	k__Bacteria;p__Bacteroidetes;c__Flavobacteriia;o__Flavobacteriales;f__Cryomorphaceae;g__	k__Bacteria;p__Bacteroidetes;c__Flavobacteriia;o__Flavobacteriales;f__Flavobacteriaceae;g__Flavobacterium	k__Bacteria;p__Bacteroidetes;c__Flavobacteriia;o__Flavobacteriales;f__[Weeksellaceae];g__Cloacibacterium	k__Bacteria;p__Bacteroidetes;c__Sphingobacteriia;o__Sphingobacteriales;f__;g__	k__Bacteria;p__Bacteroidetes;c__[Saprospirae];o__[Saprospirales];f__Saprospiraceae;g__	k__Bacteria;p__Caldiserica;c__OP5;o__WCHB1-02;f__SHBZ1169;g__	k__Bacteria;p__Caldiserica;c__TTA-B1;o__;f__;g__	k__Bacteria;p__Chlorobi;c__SJA-28;o__;f__;g__	k__Bacteria;p__Chloroflexi;c__;o__;f__;g__
U341F-U806R-P1-NW4-1-14-40	0.0	0.0	0.0	25.0	0.0	62.0	33.0	442.0	0.0	0.0	0.0	23.0	5.0	0.0	0.0	26.0	0.0	13.0	31.0	32.0	0.0	19.0	0.0	190.0	0.0	0.0	0.0	0.0	9.0	0.0	0.0	0.0	85.0	1268.0	18.0	0.0	78.0	159.0	148.0	0.0	0.0	0.0	0.0	10.0	58.0	14.0	23.0	0.0	15.0
U341F-U806R-P1-NW4-1-14-41	0.0	4.0	0.0	47.0	0.0	85.0	57.0	1355.0	0.0	0.0	0.0	40.0	10.0	0.0	13.0	54.0	6.0	14.0	120.0	50.0	13.0	41.0	0.0	524.0	0.0	0.0	0.0	0.0	36.0	4.0	10.0	6.0	133.0	2702.0	16.0	3.0	177.0	214.0	345.0	0.0	12.0	18.0	0.0	0.0	113.0	66.0	71.0	33.0	0.0
U341F-U806R-P1-NW4-1-27-100	0.0	0.0	0.0	17.0	25.0	126.0	31.0	728.0	0.0	15.0	0.0	58.0	19.0	7.0	6.0	35.0	0.0	54.0	28.0	19.0	0.0	18.0	0.0	306.0	10.0	0.0	0.0	0.0	36.0	0.0	23.0	0.0	115.0	5766.0	8.0	0.0	57.0	121.0	4.0	0.0	0.0	0.0	6.0	0.0	0.0	136.0	187.0	0.0	0.0
U341F-U806R-P1-NW4-1-29-104	0.0	0.0	0.0	0.0	13.0	84.0	33.0	150.0	0.0	10.0	0.0	171.0	51.0	0.0	6.0	134.0	0.0	93.0	72.0	0.0	0.0	82.0	0.0	469.0	0.0	27.0	12.0	9.0	24.0	17.0	46.0	0.0	321.0	4873.0	10.0	0.0	206.0	378.0	0.0	0.0	5.0	0.0	10.0	0.0	3.0	134.0	320.0	0.0	0.0
U341F-U806R-P1-NW4-1-31-108	0.0	0.0	0.0	0.0	15.0	139.0	31.0	72.0	0.0	0.0	0.0	22.0	0.0	0.0	0.0	16.0	0.0	15.0	25.0	13.0	0.0	40.0	0.0	191.0	13.0	0.0	0.0	0.0	10.0	9.0	18.0	0.0	80.0	3516.0	0.0	0.0	18.0	67.0	0.0	0.0	0.0	0.0	6.0	0.0	0.0	56.0	63.0	0.0	0.0
U341F-U806R-P1-NW4-1-31-109	0.0	0.0	0.0	0.0	12.0	66.0	19.0	129.0	0.0	0.0	0.0	18.0	13.0	0.0	0.0	18.0	0.0	14.0	24.0	13.0	0.0	0.0	0.0	195.0	0.0	0.0	0.0	0.0	18.0	9.0	17.0	0.0	58.0	3198.0	7.0	0.0	33.0	78.0	0.0	0.0	0.0	0.0	0.0	0.0	0.0	66.0	147.0	0.0	0.0
U341F-U806R-P1-NW4-1-33-79	0.0	16.0	71.0	0.0	228.0	0.0	0.0	0.0	22.0	0.0	9.0	30.0	0.0	0.0	0.0	0.0	0.0	0.0	0.0	0.0	0.0	0.0	22.0	0.0	0.0	0.0	0.0	0.0	0.0	0.0	0.0	0.0	1934.0	34.0	12.0	54.0	1047.0	0.0	0.0	258.0	0.0	0.0	0.0	0.0	0.0	0.0	0.0	0.0	0.0
U341F-U806R-P1-NW4-1-33-80	0.0	0.0	52.0	0.0	111.0	0.0	0.0	0.0	14.0	0.0	0.0	16.0	0.0	0.0	0.0	0.0	0.0	0.0	0.0	0.0	0.0	0.0	14.0	0.0	0.0	0.0	0.0	0.0	0.0	0.0	0.0	0.0	1241.0	0.0	10.0	23.0	732.0	0.0	0.0	153.0	0.0	0.0	0.0	0.0	0.0	0.0	0.0	0.0	0.0
U341F-U806R-P1-NW4-1-34-82	0.0	10.0	17.0	0.0	82.0	0.0	0.0	0.0	8.0	0.0	0.0	28.0	0.0	0.0	0.0	0.0	0.0	0.0	0.0	0.0	0.0	0.0	0.0	0.0	0.0	0.0	0.0	0.0	0.0	0.0	0.0	0.0	492.0	40.0	206.0	37.0	321.0	0.0	0.0	0.0	0.0	0.0	0.0	0.0	0.0	0.0	0.0	0.0	0.0
U341F-U806R-P1-NW4-1-34-83	4.0	12.0	33.0	0.0	135.0	0.0	0.0	0.0	8.0	0.0	0.0	55.0	0.0	0.0	0.0	0.0	0.0	0.0	0.0	0.0	0.0	0.0	23.0	0.0	0.0	0.0	0.0	0.0	0.0	0.0	0.0	0.0	745.0	95.0	328.0	88.0	451.0	0.0	0.0	107.0	0.0	0.0	0.0	0.0	0.0	0.0	0.0	0.0	0.0
U341F-U806R-P1-NW4-1-36-88	0.0	20.0	0.0	0.0	121.0	0.0	0.0	0.0	24.0	0.0	8.0	56.0	0.0	0.0	0.0	0.0	0.0	0.0	0.0	0.0	0.0	0.0	0.0	0.0	0.0	0.0	0.0	0.0	0.0	0.0	0.0	0.0	903.0	116.0	114.0	117.0	470.0	9.0	0.0	109.0	0.0	0.0	0.0	0.0	0.0	0.0	0.0	0.0	0.0
U341F-U806R-P1-NW4-1-36-89	0.0	14.0	6.0	0.0	246.0	0.0	0.0	0.0	23.0	0.0	6.0	61.0	0.0	0.0	0.0	0.0	0.0	0.0	0.0	0.0	0.0	0.0	41.0	0.0	0.0	0.0	0.0	0.0	0.0	0.0	0.0	0.0	1457.0	87.0	172.0	83.0	696.0	10.0	0.0	191.0	0.0	0.0	0.0	0.0	0.0	0.0	0.0	0.0	0.0
U341F-U806R-P1-NW4-1-38-94	0.0	0.0	0.0	0.0	75.0	0.0	0.0	0.0	7.0	0.0	0.0	0.0	0.0	0.0	0.0	0.0	0.0	0.0	0.0	0.0	0.0	0.0	10.0	0.0	0.0	0.0	0.0	0.0	0.0	0.0	0.0	0.0	657.0	27.0	25.0	39.0	378.0	0.0	0.0	92.0	0.0	0.0	0.0	0.0	0.0	0.0	0.0	0.0	0.0
U341F-U806R-P1-NW4-1-38-95	0.0	10.0	0.0	0.0	159.0	0.0	0.0	0.0	19.0	0.0	0.0	2.0	0.0	0.0	0.0	0.0	0.0	0.0	0.0	0.0	0.0	0.0	0.0	0.0	0.0	0.0	0.0	0.0	0.0	0.0	0.0	0.0	1279.0	87.0	112.0	108.0	821.0	0.0	0.0	159.0	0.0	0.0	0.0	0.0	0.0	0.0	0.0	0.0	0.0
[truncated: 151 more columns]
