# Supplementary material for: Arsenic metabolism in technical biogas plants: possible consequences for resident microbiota and downstream units
Source: AMB Express. 2019 Nov 28;9:190. doi: 10.1186/s13568-019-0902-6 (PMC6882981; doi:10.1186/s13568-019-0902-6)
Supplement: Supplementary file 3 — Additional file 3. Additional electronic material (Qiime2 files). [file 13568_2019_902_MOESM3_ESM.qzv › efce6f8b-9ad8-46e7-a1e4-5087d1d706a9/data/level-7.csv]

index	k__Archaea;p__Euryarchaeota;c__Methanobacteria;o__Methanobacteriales;f__Methanobacteriaceae;g__Methanobacterium;s__	k__Archaea;p__Euryarchaeota;c__Methanobacteria;o__Methanobacteriales;f__Methanobacteriaceae;g__Methanobrevibacter;s__	k__Archaea;p__Euryarchaeota;c__Methanobacteria;o__Methanobacteriales;f__Methanobacteriaceae;g__Methanothermobacter;s__thermautotrophicus	k__Archaea;p__Euryarchaeota;c__Methanobacteria;o__Methanobacteriales;f__WSA2;g__;s__	k__Archaea;p__Euryarchaeota;c__Methanomicrobia;o__Methanomicrobiales;f__Methanomicrobiaceae;g__Methanoculleus;s__	k__Archaea;p__Euryarchaeota;c__Methanomicrobia;o__Methanomicrobiales;f__Methanoregulaceae;g__Methanolinea;s__	k__Archaea;p__Euryarchaeota;c__Methanomicrobia;o__Methanomicrobiales;f__Methanospirillaceae;g__Methanospirillum;s__	k__Archaea;p__Euryarchaeota;c__Methanomicrobia;o__Methanosarcinales;f__Methanosaetaceae;g__Methanosaeta;s__	k__Archaea;p__Euryarchaeota;c__Methanomicrobia;o__Methanosarcinales;f__Methanosarcinaceae;g__Methanosarcina;s__	k__Archaea;p__Euryarchaeota;c__Thermoplasmata;o__E2;f__[Methanomassiliicoccaceae];g__;s__	k__Archaea;p__Euryarchaeota;c__Thermoplasmata;o__E2;f__[Methanomassiliicoccaceae];g__Methanomassiliicoccus;s__	k__Bacteria;__;__;__;__;__;__	k__Bacteria;p__;c__;o__;f__;g__;s__	k__Bacteria;p__Acidobacteria;c__BPC102;o__B110;f__;g__;s__	k__Bacteria;p__Acidobacteria;c__BPC102;o__MVS-40;f__;g__;s__	k__Bacteria;p__Acidobacteria;c__Sva0725;o__Sva0725;f__;g__;s__	k__Bacteria;p__Acidobacteria;c__[Chloracidobacteria];o__RB41;f__Ellin6075;g__;s__	k__Bacteria;p__Actinobacteria;c__;o__;f__;g__;s__	k__Bacteria;p__Actinobacteria;c__Acidimicrobiia;o__Acidimicrobiales;f__C111;g__;s__	k__Bacteria;p__Actinobacteria;c__Acidimicrobiia;o__Acidimicrobiales;f__Microthrixaceae;g__Candidatus Microthrix;s__parvicella	k__Bacteria;p__Actinobacteria;c__Actinobacteria;o__Actinomycetales;__;__;__	k__Bacteria;p__Actinobacteria;c__Actinobacteria;o__Actinomycetales;f__;g__;s__	k__Bacteria;p__Actinobacteria;c__Actinobacteria;o__Actinomycetales;f__Corynebacteriaceae;g__Corynebacterium;s__	k__Bacteria;p__Actinobacteria;c__Actinobacteria;o__Actinomycetales;f__Intrasporangiaceae;g__;s__	k__Bacteria;p__Actinobacteria;c__Actinobacteria;o__Actinomycetales;f__Microbacteriaceae;__;__	k__Bacteria;p__Actinobacteria;c__Actinobacteria;o__Actinomycetales;f__Mycobacteriaceae;g__Mycobacterium;s__	k__Bacteria;p__Actinobacteria;c__Actinobacteria;o__Actinomycetales;f__Nocardioidaceae;g__;s__	k__Bacteria;p__Actinobacteria;c__Actinobacteria;o__Actinomycetales;f__Nocardioidaceae;g__Propionicimonas;s__	k__Bacteria;p__Actinobacteria;c__Actinobacteria;o__WCHB1-81;f__At425_EubF1;g__;s__	k__Bacteria;p__Actinobacteria;c__Thermoleophilia;o__Gaiellales;f__;g__;s__	k__Bacteria;p__Actinobacteria;c__Thermoleophilia;o__Solirubrobacterales;f__;g__;s__	k__Bacteria;p__Actinobacteria;c__Thermoleophilia;o__Solirubrobacterales;f__Patulibacteraceae;g__;s__	k__Bacteria;p__Bacteroidetes;__;__;__;__;__	k__Bacteria;p__Bacteroidetes;c__Bacteroidia;o__Bacteroidales;f__;g__;s__	k__Bacteria;p__Bacteroidetes;c__Bacteroidia;o__Bacteroidales;f__Bacteroidaceae;g__;s__	k__Bacteria;p__Bacteroidetes;c__Bacteroidia;o__Bacteroidales;f__Marinilabiaceae;g__;s__	k__Bacteria;p__Bacteroidetes;c__Bacteroidia;o__Bacteroidales;f__Porphyromonadaceae;g__;s__	k__Bacteria;p__Bacteroidetes;c__Bacteroidia;o__Bacteroidales;f__Porphyromonadaceae;g__Paludibacter;s__	k__Bacteria;p__Bacteroidetes;c__Bacteroidia;o__Bacteroidales;f__Rikenellaceae;g__Blvii28;s__	k__Bacteria;p__Bacteroidetes;c__Cytophagia;o__Cytophagales;f__;g__;s__	k__Bacteria;p__Bacteroidetes;c__Flavobacteriia;o__Flavobacteriales;f__Cryomorphaceae;g__;s__	k__Bacteria;p__Bacteroidetes;c__Flavobacteriia;o__Flavobacteriales;f__Flavobacteriaceae;g__Flavobacterium;s__	k__Bacteria;p__Bacteroidetes;c__Flavobacteriia;o__Flavobacteriales;f__[Weeksellaceae];g__Cloacibacterium;s__	k__Bacteria;p__Bacteroidetes;c__Sphingobacteriia;o__Sphingobacteriales;f__;g__;s__	k__Bacteria;p__Bacteroidetes;c__[Saprospirae];o__[Saprospirales];f__Saprospiraceae;g__;s__	k__Bacteria;p__Caldiserica;c__OP5;o__WCHB1-02;f__SHBZ1169;g__;s__	k__Bacteria;p__Caldiserica;c__TTA-B1;o__;f__;g__;s__	k__Bacteria;p__Chlorobi;c__SJA-28;o__;f__;g__;s__	k__Bacteria;p__Chloroflexi;c__;o__;f__;g__;s__
U341F-U806R-P1-NW4-1-14-40	0.0	0.0	0.0	25.0	0.0	62.0	33.0	442.0	0.0	0.0	0.0	23.0	5.0	0.0	0.0	26.0	0.0	13.0	31.0	32.0	0.0	19.0	0.0	190.0	0.0	0.0	0.0	0.0	9.0	0.0	0.0	0.0	85.0	1268.0	18.0	0.0	78.0	159.0	148.0	0.0	0.0	0.0	0.0	10.0	58.0	14.0	23.0	0.0	15.0
U341F-U806R-P1-NW4-1-14-41	0.0	4.0	0.0	47.0	0.0	85.0	57.0	1355.0	0.0	0.0	0.0	40.0	10.0	0.0	13.0	54.0	6.0	14.0	120.0	50.0	13.0	41.0	0.0	524.0	0.0	0.0	0.0	0.0	36.0	4.0	10.0	6.0	133.0	2702.0	16.0	3.0	177.0	214.0	345.0	0.0	12.0	18.0	0.0	0.0	113.0	66.0	71.0	33.0	0.0
U341F-U806R-P1-NW4-1-27-100	0.0	0.0	0.0	17.0	25.0	126.0	31.0	728.0	0.0	15.0	0.0	58.0	19.0	7.0	6.0	35.0	0.0	54.0	28.0	19.0	0.0	18.0	0.0	306.0	10.0	0.0	0.0	0.0	36.0	0.0	23.0	0.0	115.0	5766.0	8.0	0.0	57.0	121.0	4.0	0.0	0.0	0.0	6.0	0.0	0.0	136.0	187.0	0.0	0.0
U341F-U806R-P1-NW4-1-29-104	0.0	0.0	0.0	0.0	13.0	84.0	33.0	150.0	0.0	10.0	0.0	171.0	51.0	0.0	6.0	134.0	0.0	93.0	72.0	0.0	0.0	82.0	0.0	469.0	0.0	27.0	12.0	9.0	24.0	17.0	46.0	0.0	321.0	4873.0	10.0	0.0	206.0	378.0	0.0	0.0	5.0	0.0	10.0	0.0	3.0	134.0	320.0	0.0	0.0
U341F-U806R-P1-NW4-1-31-108	0.0	0.0	0.0	0.0	15.0	139.0	31.0	72.0	0.0	0.0	0.0	22.0	0.0	0.0	0.0	16.0	0.0	15.0	25.0	13.0	0.0	40.0	0.0	191.0	13.0	0.0	0.0	0.0	10.0	9.0	18.0	0.0	80.0	3516.0	0.0	0.0	18.0	67.0	0.0	0.0	0.0	0.0	6.0	0.0	0.0	56.0	63.0	0.0	0.0
U341F-U806R-P1-NW4-1-31-109	0.0	0.0	0.0	0.0	12.0	66.0	19.0	129.0	0.0	0.0	0.0	18.0	13.0	0.0	0.0	18.0	0.0	14.0	24.0	13.0	0.0	0.0	0.0	195.0	0.0	0.0	0.0	0.0	18.0	9.0	17.0	0.0	58.0	3198.0	7.0	0.0	33.0	78.0	0.0	0.0	0.0	0.0	0.0	0.0	0.0	66.0	147.0	0.0	0.0
U341F-U806R-P1-NW4-1-33-79	0.0	16.0	71.0	0.0	228.0	0.0	0.0	0.0	22.0	0.0	9.0	30.0	0.0	0.0	0.0	0.0	0.0	0.0	0.0	0.0	0.0	0.0	22.0	0.0	0.0	0.0	0.0	0.0	0.0	0.0	0.0	0.0	1934.0	34.0	12.0	54.0	1047.0	0.0	0.0	258.0	0.0	0.0	0.0	0.0	0.0	0.0	0.0	0.0	0.0
U341F-U806R-P1-NW4-1-33-80	0.0	0.0	52.0	0.0	111.0	0.0	0.0	0.0	14.0	0.0	0.0	16.0	0.0	0.0	0.0	0.0	0.0	0.0	0.0	0.0	0.0	0.0	14.0	0.0	0.0	0.0	0.0	0.0	0.0	0.0	0.0	0.0	1241.0	0.0	10.0	23.0	732.0	0.0	0.0	153.0	0.0	0.0	0.0	0.0	0.0	0.0	0.0	0.0	0.0
U341F-U806R-P1-NW4-1-34-82	0.0	10.0	17.0	0.0	82.0	0.0	0.0	0.0	8.0	0.0	0.0	28.0	0.0	0.0	0.0	0.0	0.0	0.0	0.0	0.0	0.0	0.0	0.0	0.0	0.0	0.0	0.0	0.0	0.0	0.0	0.0	0.0	492.0	40.0	206.0	37.0	321.0	0.0	0.0	0.0	0.0	0.0	0.0	0.0	0.0	0.0	0.0	0.0	0.0
U341F-U806R-P1-NW4-1-34-83	4.0	12.0	33.0	0.0	135.0	0.0	0.0	0.0	8.0	0.0	0.0	55.0	0.0	0.0	0.0	0.0	0.0	0.0	0.0	0.0	0.0	0.0	23.0	0.0	0.0	0.0	0.0	0.0	0.0	0.0	0.0	0.0	745.0	95.0	328.0	88.0	451.0	0.0	0.0	107.0	0.0	0.0	0.0	0.0	0.0	0.0	0.0	0.0	0.0
U341F-U806R-P1-NW4-1-36-88	0.0	20.0	0.0	0.0	121.0	0.0	0.0	0.0	24.0	0.0	8.0	56.0	0.0	0.0	0.0	0.0	0.0	0.0	0.0	0.0	0.0	0.0	0.0	0.0	0.0	0.0	0.0	0.0	0.0	0.0	0.0	0.0	903.0	116.0	114.0	117.0	470.0	9.0	0.0	109.0	0.0	0.0	0.0	0.0	0.0	0.0	0.0	0.0	0.0
U341F-U806R-P1-NW4-1-36-89	0.0	14.0	6.0	0.0	246.0	0.0	0.0	0.0	23.0	0.0	6.0	61.0	0.0	0.0	0.0	0.0	0.0	0.0	0.0	0.0	0.0	0.0	41.0	0.0	0.0	0.0	0.0	0.0	0.0	0.0	0.0	0.0	1457.0	87.0	172.0	83.0	696.0	10.0	0.0	191.0	0.0	0.0	0.0	0.0	0.0	0.0	0.0	0.0	0.0
U341F-U806R-P1-NW4-1-38-94	0.0	0.0	0.0	0.0	75.0	0.0	0.0	0.0	7.0	0.0	0.0	0.0	0.0	0.0	0.0	0.0	0.0	0.0	0.0	0.0	0.0	0.0	10.0	0.0	0.0	0.0	0.0	0.0	0.0	0.0	0.0	0.0	657.0	27.0	25.0	39.0	378.0	0.0	0.0	92.0	0.0	0.0	0.0	0.0	0.0	0.0	0.0	0.0	0.0
U341F-U806R-P1-NW4-1-38-95	0.0	10.0	0.0	0.0	159.0	0.0	0.0	0.0	19.0	0.0	0.0	2.0	0.0	0.0	0.0	0.0	0.0	0.0	0.0	0.0	0.0	0.0	0.0	0.0	0.0	0.0	0.0	0.0	0.0	0.0	0.0	0.0	1279.0	87.0	112.0	108.0	821.0	0.0	0.0	159.0	0.0	0.0	0.0	0.0	0.0	0.0	0.0	0.0	0.0
[truncated: 154 more columns]
