# Supplementary material for: Arsenic metabolism in technical biogas plants: possible consequences for resident microbiota and downstream units
Source: AMB Express. 2019 Nov 28;9:190. doi: 10.1186/s13568-019-0902-6 (PMC6882981; doi:10.1186/s13568-019-0902-6)
Supplement: Supplementary file 3 — Additional file 3. Additional electronic material (Qiime2 files). [file 13568_2019_902_MOESM3_ESM.qzv › efce6f8b-9ad8-46e7-a1e4-5087d1d706a9/provenance/action/metadata.tsv]

#SampleID	Process Day	arsenite add.	plant no.	plant type
#q2:types	categorical	categorical	categorical	categorical
U341F-U806R-P1-NW4-1-33-79	01	As0	#01	Biogas
U341F-U806R-P1-NW4-1-33-80	01	As0	#01	Biogas
U341F-U806R-P1-NW4-1-34-82	15	As0	#01	Biogas
U341F-U806R-P1-NW4-1-34-83	15	As0	#01	Biogas
U341F-U806R-P1-NW4-1-36-88	15	As30	#01	Biogas
U341F-U806R-P1-NW4-1-36-89	15	As30	#01	Biogas
U341F-U806R-P1-NW4-1-38-94	15	As60	#01	Biogas
U341F-U806R-P1-NW4-1-38-95	15	As60	#01	Biogas
U341F-U806R-P1-NW4-1-14-40	01	As0	#14	SSD
U341F-U806R-P1-NW4-1-14-41	01	As0	#14	SSD
U341F-U806R-P1-NW4-1-27-100	15	As0	#14	SSD
U341F-U806R-P1-NW4-1-29-104	15	As30	#14	SSD
U341F-U806R-P1-NW4-1-31-108	15	As60	#14	SSD
U341F-U806R-P1-NW4-1-31-109	15	As60	#14	SSD
