# Supplementary material for: Arsenic metabolism in technical biogas plants: possible consequences for resident microbiota and downstream units
Source: AMB Express. 2019 Nov 28;9:190. doi: 10.1186/s13568-019-0902-6 (PMC6882981; doi:10.1186/s13568-019-0902-6)
Supplement: Supplementary file 3 — Additional file 3. Additional electronic material (Qiime2 files). [file 13568_2019_902_MOESM3_ESM.qzv › efce6f8b-9ad8-46e7-a1e4-5087d1d706a9/provenance/artifacts/efe37421-68f1-4a86-8818-59f4b04bed12/metadata.yaml]

uuid: efe37421-68f1-4a86-8818-59f4b04bed12
type: SampleData[PairedEndSequencesWithQuality]
format: SingleLanePerSamplePairedEndFastqDirFmt
